# Supplementary material for: p90 Ribosomal S6 kinases play a significant role in early gene regulation in the cardiomyocyte response to Gq-protein-coupled receptor stimuli, endothelin-1 and α1-adrenergic receptor agonists
Source: Oxford University Press journal article supplement (doi:10.1042/bj20121371), 2012-12-11
Supplement: bj4500351add.pdf [file bj4500351add.pdf]

## Supplemental Table S1A Antibodies used for immunoblotting

CST, Cell Signaling Technologies Inc.; SCBT, Santa Cruz Biotechnology Inc.

| Primary Antibodies                                                                                              | Source(Cat. no.) | Species | Dilution |
|-----------------------------------------------------------------------------------------------------------------|------------------|---------|----------|
| Total ERK1/2                                                                                                    | CST (#9102)      | Rabbit  | 1/1000   |
| Phospho-ERK1(Thr <sup>203</sup> /Tyr <sup>205</sup> )/<br>Phospho-ERK2(Thr <sup>183</sup> /Tyr <sup>185</sup> ) | CST (#4377)      | Rabbit  | 1/1000   |
| RSK1/RSK2/RSK3 (32D7)<br>(Total RSKs)                                                                           | CST (#9355)      | Rabbit  | 1/750    |
| RSK1                                                                                                            | CST (#9333)      | Rabbit  | 1/750    |
| RSK2                                                                                                            | CST (#9340)      | Rabbit  | 1/750    |
| Phospho-p90RSK(Thr <sup>573</sup> )                                                                             | CST (#9346)      | Rabbit  | 1/750    |
| Phospho-p90RSK (Thr <sup>359</sup> /Ser <sup>363</sup> )                                                        | CST (#9340)      | Rabbit  | 1/750    |
| Phospho-p90RSK (Ser <sup>380</sup> )                                                                            | CST (#9341)      | Rabbit  | 1/750    |
| Total MKK1/2                                                                                                    | CST (#9122)      | Rabbit  | 1/1000   |
| Phospho-MKK1/2(Ser <sup>217/221</sup> )                                                                         | CST (#9121)      | Rabbit  | 1/1000   |
| Total AMPK                                                                                                      | CST (#2603)      | Rabbit  | 1/1000   |
| Phospho-AMPK(Thr <sup>172</sup> )                                                                               | CST (#2535)      | Rabbit  | 1/1000   |
| RSK1(C-21)                                                                                                      | SCBT (sc-231)    | Goat    | 1/200    |
| RSK2(C-19)                                                                                                      | SCBT (sc-1430)   | Goat    | 1/200    |

## Supplemental Table S1B Primers used for qPCR

mRNA sequences were from the Rat Genome Database viewed at <http://www.ncbi.nlm.nih.gov/entrez> (gene symbols are given with accession numbers).

| Gene Symbol, Accession no.                    | Size (bp) | Position                  | Forward primer               | Reverse primer                |
|-----------------------------------------------|-----------|---------------------------|------------------------------|-------------------------------|
| Arc, NM_019361.1                              | 85        | 2207-2291                 | CCGTCCTCCTCTCTTGA            | CACCTCCTCTTTGTAATCCTATTTTCTC  |
| Areg, NM_017123.1                             | 58        | 222-279                   | TGGTCTTAGGCTCAGGCCATT        | CCAGAGCTGGTCCCATTG            |
| Atf3, NM_012912.1                             | 108       | 302-409                   | TCGCCATCCAGAACAAGCA          | GGGCCACCTCAGACTTGGT           |
| Ch25h, NM_001025415.1                         | 100       | 404-503                   | GCTCTTCGACACCGAGATCTTC       | GGAGGACGAGTTCTGGTGATG         |
| Cicf1, NM_207615.2                            | 99        | 373-471                   | AACCTATGACCTCACCCGCTAC       | TTGAAGTCAGGCTCGTTGAAAGG       |
| Dusp10, NM_001105734                          | 137       | 1279-1415                 | GCCACAGACAGCAACAAGCAGAAC     | ATGACAATGGTGGCAGAACGGGAC      |
| Dusp4, NM_022199                              | 114       | 783-896                   | GGAAGCCATCGAATACATAGACGCAG   | TTCATCATCAGGTAGGCCAGGCAG      |
| Dusp5, NM_133578.1                            | 72        | 882-953                   | CGACATTAGCTCCCACTTTCAA       | AGGACCTTGCCTCCCTCTTC          |
| Edn1, NM_012548                               | 92        | 520-611                   | CAGTGTGCTCACCAAAAAGACAAGA    | TTTACGCCTTTCTGCATGGTACTT      |
| Egr1, NM_012551.2                             | 84        | 198-281                   | ACAACCCTACGAGCACCTG          | GGATAACTTGTCTCCACCAG          |
| Egr2, NM_053633.1                             | 102       | 507-608                   | CTGGAGATGGCATGATCAACA        | TCTGGTTCTAGGGCGCAGAGA         |
| Egr3, NM_017086.1                             | 96        | 66-161                    | CAATCTGTACCCCGAGGAGATC       | ACATTCTCTGTAGCCATCTGAGTGTA    |
| Ets1, NM_012555                               | 94        | 443-536                   | GTTTCACAAAAGAGCAGCAGCGAC     | TTCACAGCCCACATCACCCAATCC      |
| Fos, NM_022197                                | 111       | 226-336                   | ACAGCCTTTCTACTACCATTCCC      | GGATAAAGTTGGCACTAGAGACGG      |
| Fosb, NM_001256509.1                          | 70        | 847-916                   | CGTCGGAGGGAGCTGACA           | CCAGCTCTGCCTTTTCTCTT          |
| Fos1, NM_012953.1                             | 71        | 324-394                   | GCAGCAGAAGTTCCACCTTGT        | GCACCATCCACTGCAATTCC          |
| Gclc, NM_012815.2                             | 78        | 882-957                   | TGCCCAATTGTTATGGCTTTG        | TCCCCACGCACAATCAAT            |
| Gapdh, NM_017008.3                            | 93        | 552-644                   | CCAAGGTCATCCATGACAACCT       | AGGGCCATCCACAGTCTT            |
| Gpr3, NM_153727.1                             | 81        | 789-869                   | CGCCAACTCTCCTCTCTCTAC        | GCGTAATGACCGGGTTGAT           |
| Has1, NM_172323                               | 119       | 1059-1177                 | CACATTTGGGGATGACAGGCAC       | TCAGCCAACGAAGGAAAGAGGAG       |
| Has2, NM_013153                               | 147       | 1086-1232                 | ATGTACACCGCCTTCAGAGCAC       | AACATCTCCCCAACACCTCC          |
| Hbegf, NM_012945.1                            | 101       | 538-638                   | ACTGTGATCTGTCTGTCTTCTTGTC    | CCAACTTCACTTTCTCCTCACTTTC     |
| Hmgcr, NM_013134.2                            | 65        | 2301-2365                 | CATGCTGCCAACATCGTCA          | CCCACATTCTGTGCTGCATC          |
| IL11, NM_133519.4                             | 80        | 209-288                   | CTTCAGACCCTCGTGACATC         | TGCAGCTAGTTGCCGTGTGT          |
| Klf4, NM_053713.1                             | 138       | 1159-1296                 | GCAAGTCCCCTCTCTCCATTATC      | CCACAGCCTGCATAGTACAAG         |
| Klf5, NM_053394.2                             | 153       | 442-594                   | TTCCCCGGAGACGATCTGAAAC       | TGAAATTATCGGAAGTGGAGGAAGC     |
| Lif, NM_022196                                | 139       | 170-308                   | GCAGTGCCAATGCCCTCTTTATTTT    | ACCAACTTGGTCTTCTCTGTCCC       |
| Mdm2, NM_001108099.1                          | 69        | 211-279                   | TCCGACCACCGTGCTTCT           | TCGGTAGACACAGACATGTTGGTA      |
| Myc, NM_012603                                | 117       | 516-632                   | GCTCCTCGCGTATTTTGAAGCCTG     | CGAGTCGTAGTCGAGGTCATAGTTCC    |
| Nr4a1, NM_024388                              | 146       | 1190-1335                 | TACCAATCTCCTCACGTCCCTC       | GCAAGTCATAAAATTGCTGCACGTC     |
| Nr4a2, NM_019328                              | 114       | 1452-1565                 | TGTTCTACGCTTAGCATAAGGTCC     | GAATCAATCCATTCCCCAAAGCCAC     |
| Nr4a3, NM_031628.1, NM_017352                 | 81        | 1770-1850, 1557-1637      | CGGGATGGTGAAGGAAGTTGTG       | AGTGGGCTCTTTGGTTTGAAG         |
| Olr1, NM_133306                               | 115       | 852-966                   | ACTGGGAAAAAGTCGGGAGAATTG     | AATGGGGAGGTGGAATGGGAAG        |
| Pim1, NM_017034                               | 112       | 712-823                   | TGCGGAGATATTCCATTTGAGCAC     | TCAGGGACAGGCACCATCTAATAAG     |
| Plk2, NM_031821.1                             | 92        | 1046-1137                 | GCACCTTGATAGCCAGCATGCT       | TGAAGCCCTGCAGAAAGAAGTC        |
| Ptgs2, NM_017232.3                            | 90        | 1393-1482                 | GAAGAAGTTACAGGAGAGAAAGAAATGG | CAGCAGGGCGGGATACAGT           |
| Rasd1, XM_340809.4                            | 94        | 314-407                   | GCGGCGAAGTCTACCAGTTG         | AAAACGTCTCCTGTGAGGATAGAGA     |
| Ras11b, NM_001002830.2                        | 82        | 344-425                   | GAACGAAATGCAGGTAACCTCTACA    | CTGGAGTGTCTGGACCTGAA          |
| Rgs2, NM_053453.2                             | 90        | 209-298                   | TCAAGCCTTCTCCTGAGGAAGC       | ACGCTCTGAATGCAGCAAGC          |
| Ripk2, NM_001191865                           | 142       | 666-807                   | TCACGGAGCTACAAATCTGCAC       | TGGACAACACTTCCCACATGATAAC     |
| Rnd3, NM_001007641.1                          | 117       | 411-527                   | CTGTGGGACACTTCAGGTTT         | GACACTGTCCAGAGTTTCTG          |
| Sgk1, NM_001193568, NM_001193569, NM_019232.3 | 80        | 883-862, 821-900, 795-874 | GGAGAACATCGAGCACAATGGGACAAC  | GCTTATGGAGAACCTCAGGAGCGAGATAC |
| Sik1, NM_021693                               | 94        | 493-586                   | ACAACCATCATCTGCCACCG         | TTCCCCAAATCCAAAATCTGCCAGC     |

## Supplemental Table S2 Changes in transcript expression induced by PD184352 or BI-D1870

Cardiomyocytes were exposed to 2  $\mu$ M PD184352 or 10  $\mu$ M BI-D1870 for 70 min or were unstimulated (Control). RNA expression analysis was performed using Affymetrix rat exon 1.0 ST arrays and GeneSpring 12.0. The raw data for controls are given and results are the mean fold change relative to the controls (n=3). Statistical analysis was performed by one-way ANOVA with SNK post-test using a Benjamini and Hochberg false discovery rate correction (FDR<0.05) \* PD184352 vs control; # BI-D1870 vs control.

| Probeset ID | Gene Symbol | Gene Title                                                              | Raw data (Control) | PD184352 | BI-D1870 |   |
|-------------|-------------|-------------------------------------------------------------------------|--------------------|----------|----------|---|
| 7091079     | Adamts1     | ADAM metalloproteinase with thrombospondin type 1 motif, 1              | 1011               | 0.787    | 0.496    | # |
| 7343686     | Adamts15    | ADAM metalloproteinase with thrombospondin type 1 motif, 15             | 451                | 1.323    | 0.610    | # |
| 7035427     | Adm         | Adrenomedullin                                                          | 440                | 1.097    | 0.374    | # |
| 7221853     | Adora2a     | Adenosine A2a receptor                                                  | 325                | 0.945    | 0.612    | # |
| 7068434     | Adora2b     | Adenosine A2B receptor                                                  | 342                | 0.995    | 0.606    | # |
| 7339834     | Amotl2      | Angiomotin like 2                                                       | 248                | 1.025    | 0.662    | # |
| 7229539     | Aplnr       | Apelin receptor                                                         | 422                | 0.798    | 0.460    | # |
| 7328919     | Arc         | Activity-regulated cytoskeleton-associated protein                      | 67                 | 1.010    | 2.254    | # |
| 7218259     | Arid5b      | AT rich interactive domain 5B (Mrf1 like)                               | 671                | 0.948    | 0.639    | # |
| 7224825     | Arrdc3      | Arrestin domain containing 3                                            | 1403               | 0.789    | 0.571    | # |
| 7115455     | Atf3        | Activating transcription factor 3                                       | 599                | 1.161    | 2.728    | # |
| 7318949     | Atf4        | Activating transcription factor 4 (tax-responsive enhancer element B67) | 1343               | 1.103    | 1.551    | # |
| 7105894     | B3galt2     | UDP-Gal:betaGlcNAc beta 1,3-galactosyltransferase, polypeptide 2        | 332                | 0.958    | 0.594    | # |
| 7346390     | Bbs4        | Bardet-Biedl syndrome 4                                                 | 186                | 1.099    | 1.579    | # |
| 7246720     | Bcl2l1      | Bcl2-like 1                                                             | 102                | 0.795    | 0.636    | # |
| 7048723     | Bcl3        | B-cell CLL/lymphoma 3                                                   | 423                | 1.229    | 0.501    | # |
| 7271485     | Bhlhe41     | Basic helix-loop-helix family, member e41                               | 206                | 1.273    | 0.536    | # |
| 7341999     | Birc3       | Baculoviral IAP repeat-containing 3                                     | 181                | 1.068    | 0.653    | # |
| 7137201     | Bmp4        | Bone morphogenetic protein 4                                            | 259                | 0.969    | 0.658    | # |
| 7111272     | Btg2        | BTG family, member 2                                                    | 448                | 0.740    | 1.918    | # |
| 7204662     | Card6       | Caspase recruitment domain family, member 6                             | 651                | 0.855    | 0.658    | # |
| 7041913     | Ccnj        | Cyclin J                                                                | 356                | 1.008    | 0.654    | # |
| 7113283     | Cct6a       | Chaperonin containing Tcp1, subunit 6A (zeta 1)                         | 1150               | 1.008    | 0.121    | # |
| 7059858     | Cdc42ep2    | CDC42 effector protein (Rho GTPase binding) 2                           | 403                | 0.913    | 0.455    | # |
| 7145493     | Cdkn2aip    | CDKN2A interacting protein                                              | 212                | 1.117    | 2.218    | # |
| 7231595     | Chac1       | ChaC, cation transport regulator homolog 1 (E. coli)                    | 450                | 1.089    | 1.668    | # |
| 7258873     | Clec2g      | C-type lectin domain family 2, member g                                 | 602                | 0.906    | 0.395    | # |
| 7353440     | Cnm4        | Cyclin M4                                                               | 188                | 1.072    | 1.730    | # |
| 7350918     | Csrnp1      | Cysteine-serine-rich nuclear protein 1                                  | 269                | 1.140    | 1.658    | # |
| 7331805     | Csrnp2      | Cysteine-serine-rich nuclear protein 2                                  | 158                | 1.191    | 1.691    | # |
| 7235787     | Cstf1       | Cleavage stimulation factor, 3' pre-RNA, subunit 1                      | 495                | 0.940    | 0.636    | # |
| 7110790     | Cxcr4       | Chemokine (C-X-C motif) receptor 4                                      | 759                | 0.693    | 0.628    | # |
| 7357534     | Cxcr7       | Chemokine (C-X-C motif) receptor 7                                      | 2808               | 1.095    | 0.583    | # |
| 7299086     | Dact1       | Dapper, antagonist of beta-catenin, homolog 1 (Xenopus laevis)          | 416                | 1.116    | 0.509    | # |

|         |              |                                                                                             |      |       |       |   |
|---------|--------------|---------------------------------------------------------------------------------------------|------|-------|-------|---|
| 7315869 | Ddit3        | DNA-damage inducible transcript 3                                                           | 328  | 1.139 | 2.427 | # |
| 7212476 | Ddx20        | DEAD (Asp-Glu-Ala-Asp) box polypeptide 20                                                   | 339  | 1.087 | 0.633 | # |
| 7146093 | Dlc1         | Deleted in liver cancer 1                                                                   | 472  | 0.804 | 0.655 | # |
| 7107035 | Dnm3         | Dynamin 3                                                                                   | 253  | 1.043 | 0.347 | # |
| 7108644 | Dusp10       | Dual specificity phosphatase 10                                                             | 374  | 1.097 | 0.626 | # |
| 7163221 | Edn1         | Endothelin 1                                                                                | 180  | 0.826 | 0.653 | # |
| 7188693 | Enc1         | Ectodermal-neural cortex 1                                                                  | 570  | 0.900 | 0.543 | # |
| 7198615 | F3           | Coagulation factor III (thromboplastin, tissue factor)                                      | 158  | 1.090 | 0.638 | # |
| 7297136 | Fam110c      | Family with sequence similarity 110, member C                                               | 140  | 1.092 | 0.595 | # |
| 7348271 | Fam46a       | Family with sequence similarity 46, member A                                                | 926  | 0.903 | 0.339 | # |
| 7045890 | Fbxo5        | F-box protein 5                                                                             | 98   | 1.089 | 0.665 | # |
| 7376314 | Fgf16        | Fibroblast growth factor 16                                                                 | 264  | 0.889 | 0.569 | # |
| 7279359 | Fhl3         | Four and a half LIM domains 3                                                               | 677  | 0.672 | 0.658 | # |
| 7300295 | Fos          | FBJ osteosarcoma oncogene                                                                   | 175  | 0.815 | 2.153 | # |
| 7048605 | Fosb         | FBJ osteosarcoma oncogene B                                                                 | 95   | 1.346 | 2.295 | # |
| 7246735 | Foxs1        | Forkhead box S1                                                                             | 343  | 0.745 | 0.444 | # |
| 7158860 | Fzd8         | Frizzled homolog 8 (Drosophila)                                                             | 417  | 0.918 | 0.658 | # |
| 7115625 | G0s2         | G0/G1switch 2                                                                               | 508  | 0.998 | 0.577 | # |
| 7163357 | Gcnt2        | Glucosaminyl (N-acetyl) transferase 2, I-branching enzyme                                   | 135  | 0.904 | 0.612 | # |
| 7335470 | H2afx        | H2A histone family, member X                                                                | 1202 | 1.079 | 1.831 | # |
| 7084517 | H3f3b        | H3 histone, family 3B                                                                       | 2359 | 1.137 | 1.869 | # |
| 7157777 | Hist1h1t     | Histone cluster 1, H1t                                                                      | 57   | 1.133 | 7.278 | # |
| 7157872 | Hist1h4b     | Histone cluster 1, H4b                                                                      | 568  | 1.139 | 2.373 | # |
| 7197073 | Hist2h2be    | Histone cluster 2, H2be                                                                     | 137  | 1.105 | 2.320 | # |
| 7157786 | Hist2h3c     | Histone cluster 2, H3c                                                                      | 52   | 1.032 | 4.485 | # |
| 7269087 | Hsn2         | Hereditary sensory neuropathy, type II                                                      | 109  | 1.020 | 1.741 | # |
| 7133438 | Htr2a        | 5-hydroxytryptamine (serotonin) receptor 2A                                                 | 778  | 0.701 | 0.559 | # |
| 7333461 | Icam4        | Intercellular adhesion molecule 4, Landsteiner-Wiener blood group                           | 86   | 1.000 | 1.783 | # |
| 7194929 | Il12a        | Interleukin 12a                                                                             | 99   | 0.710 | 0.585 | # |
| 7199369 | Ints12       | integrator complex subunit 12                                                               | 543  | 1.006 | 0.625 | # |
| 7364446 | Irs1         | Insulin receptor substrate 1                                                                | 432  | 0.871 | 0.658 | # |
| 7311391 | Itgb8        | Integrin, beta 8                                                                            | 332  | 0.918 | 0.615 | # |
| 7041047 | Jak2         | Janus kinase 2                                                                              | 160  | 0.710 | 0.455 | # |
| 7288744 | Jun          | Jun proto-oncogene                                                                          | 440  | 1.116 | 3.392 | # |
| 7179739 | Junb         | Jun B proto-oncogene                                                                        | 295  | 0.980 | 1.781 | # |
| 7356519 | Kcne4        | Potassium voltage-gated channel, Isk-related subfamily, gene 4                              | 546  | 1.177 | 0.550 | # |
| 7073296 | Kcnj2        | Potassium inwardly-rectifying channel, subfamily J, member 2                                | 490  | 0.427 | 0.427 | # |
| 7149521 | Klf2         | Kruppel-like factor 2 (lung)                                                                | 173  | 1.371 | 4.566 | # |
| 7286480 | Klf4         | Kruppel-like factor 4 (gut)                                                                 | 275  | 1.079 | 1.599 | # |
| 7327859 | Kihl38       | Kelch-like 38 (Drosophila)                                                                  | 151  | 1.142 | 0.642 | # |
| 7057647 | LOC100360446 | Zinc finger and SCAN domain containing 2-like                                               | 147  | 0.990 | 0.632 | # |
| 7157787 | LOC502940    | Pro-histogranin                                                                             | 45   | 0.990 | 5.205 | # |
| 7177292 | LOC679129    | Similar to Peroxisomal biogenesis factor 19 (Peroxin-19) (Peroxisomal farnesylated protein) | 169  | 1.046 | 0.551 | # |
| 7263342 | LOC688916    | Hypothetical protein LOC688916                                                              | 154  | 1.027 | 0.579 | # |
| 7133360 | Lpar6        | Lysophosphatidic acid receptor 6                                                            | 799  | 0.985 | 0.560 | # |

|         |                        |                                                                                 |     |       |        |   |
|---------|------------------------|---------------------------------------------------------------------------------|-----|-------|--------|---|
| 7088871 | Lrrc33                 | Leucine rich repeat containing 33                                               | 360 | 0.669 | 0.611  | # |
| 7118006 | Lrrc66                 | Leucine rich repeat containing 66                                               | 52  | 1.050 | 1.816  | # |
| 7216760 | Ly6g5b                 | Lymphocyte antigen 6 complex, locus G5B                                         | 67  | 1.342 | 2.063  | # |
| 7374315 | MGC95208               | Similar to 4930453N24Rik protein                                                | 694 | 0.958 | 0.600  | # |
| 7070818 | Mir301a                | MicroRNA mir-301a                                                               | 158 | 0.989 | 0.661  | # |
| 7290692 | Mir30c-1 ///<br>Mir30e | MicroRNA mir-30c-1 /// MicroRNA mir-30e                                         | 98  | 1.110 | 0.622  | # |
| 7250666 | Mterf                  | Mitochondrial transcription termination factor                                  | 139 | 1.000 | 0.609  | # |
| 7304727 | Mycn                   | v-myc myelocytomatosis viral related oncogene, neuroblastoma derived (avian)    | 181 | 0.713 | 0.638  | # |
| 7156535 | Nedd9                  | Neural precursor cell expressed, developmentally down-regulated 9               | 472 | 1.314 | 0.574  | # |
| 7197523 | Ngf                    | Nerve growth factor (beta polypeptide)                                          | 104 | 0.834 | 0.624  | # |
| 7320920 | Nr4a1                  | Nuclear receptor subfamily 4, group A, member 1                                 | 234 | 1.150 | 12.279 | # |
| 7239111 | Nr4a2                  | Nuclear receptor subfamily 4, group A, member 2                                 | 155 | 1.267 | 2.867  | # |
| 7274931 | Nr4a3                  | Nuclear receptor subfamily 4, group A, member 3                                 | 141 | 0.869 | 1.955  | # |
| 7104982 | Nuak2                  | NUAK family, SNF1-like kinase, 2                                                | 202 | 1.212 | 0.566  | # |
| 7354355 | Obfc2a                 | Oligonucleotide/oligosaccharide-binding fold containing 2A                      | 592 | 0.959 | 0.600  | # |
| 7286860 | Olr854                 | Olfactory receptor 854                                                          | 28  | 1.099 | 1.639  | # |
| 7296159 | Osr1                   | Odd-skipped related 1 (Drosophila)                                              | 452 | 1.330 | 0.420  | # |
| 7208307 | Pcdh18                 | Protocadherin 18                                                                | 535 | 1.018 | 0.512  | # |
| 7255389 | Pcgf1                  | Polycomb group ring finger 1                                                    | 362 | 1.085 | 0.557  | # |
| 7159665 | Pfkfb3                 | 6-phosphofructo-2-kinase/fructose-2,6-biphosphatase 3                           | 271 | 1.341 | 0.584  | # |
| 7308833 | Pgf                    | Placental growth factor                                                         | 356 | 1.449 | 0.660  | # |
| 7042529 | Pprc1                  | Peroxisome proliferator-activated receptor gamma, coactivator-related 1         | 292 | 0.904 | 0.635  | # |
| 7308969 | Pqcp                   | Polyglutamine-containing protein                                                | 553 | 1.025 | 0.566  | # |
| 7152038 | Pragmin                | Pragma of Rnd2                                                                  | 224 | 0.793 | 0.648  | # |
| 7204681 | Ptger4                 | Prostaglandin E receptor 4 (subtype EP4)                                        | 306 | 0.673 | 0.442  | # |
| 7061758 | Ranbp6                 | RAN binding protein 6                                                           | 333 | 0.984 | 0.499  | # |
| 7329428 | Rbm9                   | RNA binding motif protein 9                                                     | 251 | 1.006 | 0.646  | # |
| 7057923 | RGD1305014             | Similar to RIKEN cDNA 2310057M21                                                | 222 | 0.977 | 0.532  | # |
| 7280458 | RGD1359529             | Similar to chromosome 1 open reading frame 63                                   | 737 | 1.068 | 1.581  | # |
| 7197076 | RGD1563516             | Similar to histone protein Hist2h3c1                                            | 135 | 1.094 | 2.337  | # |
| 7157785 | RGD1564767             | Histone H2a                                                                     | 104 | 1.131 | 2.040  | # |
| 7113758 | Rgs4                   | Regulator of G-protein signaling 4                                              | 468 | 1.423 | 0.510  | # |
| 7304448 | Rhob                   | Ras homolog gene family, member B                                               | 575 | 1.280 | 5.709  | # |
| 7075385 | Rnf151                 | Ring finger protein 151                                                         | 91  | 0.851 | 1.832  | # |
| 7141425 | Rnf219                 | Ring finger protein 219                                                         | 187 | 0.905 | 0.666  | # |
| 7160191 | Rpp38                  | Ribonuclease P/MRP 38 subunit (human)                                           | 172 | 0.902 | 0.635  | # |
| 7178179 | Rrad                   | Ras-related associated with diabetes                                            | 471 | 0.939 | 0.400  | # |
| 7055461 | Rrp8                   | Ribosomal RNA processing 8, methyltransferase, homolog (yeast)                  | 235 | 0.864 | 0.636  | # |
| 7342926 | S1pr2                  | Sphingosine-1-phosphate receptor 2                                              | 727 | 0.983 | 0.631  | # |
| 7137751 | Sall2                  | Sal-like 2 (Drosophila)                                                         | 138 | 0.995 | 0.614  | # |
| 7232029 | Sema6d                 | Sema domain, transmembrane domain (TM), and cytoplasmic domain, (semaphorin) 6D | 285 | 0.787 | 0.661  | # |

|         |                 |                                                                                                               |      |       |       |   |
|---------|-----------------|---------------------------------------------------------------------------------------------------------------|------|-------|-------|---|
| 7106913 | Serpinc1        | Serine (or cysteine) peptidase inhibitor, clade C (antithrombin), member 1                                    | 58   | 0.883 | 1.621 | # |
| 7101220 | Serpine1        | Serine (or cysteine) peptidase inhibitor, clade E, member 1                                                   | 944  | 0.719 | 1.582 | # |
| 7029999 | Sertad1         | SERTA domain containing 1                                                                                     | 191  | 1.080 | 1.513 | # |
| 7045121 | Sgk1            | Serum/glucocorticoid regulated kinase 1                                                                       | 909  | 0.836 | 0.563 | # |
| 7226284 | Sh2d3c          | SH2 domain containing 3C                                                                                      | 318  | 0.792 | 0.654 | # |
| 7157791 | Slc17a2 Slc17a3 | Solute carrier family 17 (sodium phosphate), member 2   solute carrier family 17 (sodium phosphate), member 3 | 65   | 0.985 | 1.549 | # |
| 7053013 | Slco3a1         | Solute carrier organic anion transporter family, member 3a1                                                   | 152  | 0.820 | 0.525 | # |
| 7191852 | Snx16           | Sorting nexin 16                                                                                              | 126  | 0.976 | 0.595 | # |
| 7084788 | Socs3           | Suppressor of cytokine signaling 3                                                                            | 827  | 1.175 | 0.478 | # |
| 7132725 | Sox7            | SRY (sex determining region Y)-box 7                                                                          | 175  | 0.829 | 0.598 | # |
| 7193228 | Spry1           | Sprouty homolog 1, antagonist of FGF signaling (Drosophila)                                                   | 528  | 0.699 | 0.618 | # |
| 7258354 | Spsb2           | SplA/ryanodine receptor domain and SOCS box containing 2                                                      | 129  | 1.046 | 0.597 | # |
| 7233921 | Srxn1           | Sulfiredoxin 1 homolog (S. cerevisiae)                                                                        | 120  | 1.039 | 1.871 | # |
| 7133039 | Stc1            | Stanniocalcin 1                                                                                               | 1359 | 1.048 | 0.606 | # |
| 7232526 | Stk35           | Serine/threonine kinase 35                                                                                    | 390  | 1.086 | 0.644 | # |
| 7025936 | Tcf21           | Transcription factor 21                                                                                       | 583  | 0.924 | 0.385 | # |
| 7366702 | Tgif1           | TGF $\beta$ -induced factor homeobox 1                                                                        | 1578 | 0.774 | 0.372 | # |
| 7276021 | Tlr4            | Toll-like receptor 4                                                                                          | 403  | 0.683 | 0.591 | # |
| 7202800 | Tmem171         | Transmembrane protein 171                                                                                     | 132  | 1.048 | 0.636 | # |
| 7292877 | Tnfrsf1b        | Tumor necrosis factor receptor superfamily, member 1b                                                         | 604  | 0.934 | 0.652 | # |
| 7071308 | Tob1            | Transducer of ErbB-2.1                                                                                        | 608  | 1.254 | 1.587 | # |
| 7054758 | Tsku            | Tsukushin                                                                                                     | 494  | 1.067 | 0.648 | # |
| 7197113 | Txnip           | Thioredoxin interacting protein                                                                               | 1972 | 1.425 | 1.812 | # |
| 7113823 | Uap1            | UDP-N-acetylglucosamine pyrophosphorylase 1                                                                   | 347  | 0.904 | 1.591 | # |
| 7034150 | Unknown         | Unknown                                                                                                       | 432  | 0.811 | 0.632 | # |
| 7040414 | Unknown         | Unknown                                                                                                       | 120  | 0.655 | 0.606 | # |
| 7043386 | Unknown         | Unknown                                                                                                       | 121  | 1.057 | 0.608 | # |
| 7054400 | Unknown         | Unknown                                                                                                       | 410  | 0.960 | 0.572 | # |
| 7077262 | Unknown         | Unknown                                                                                                       | 195  | 1.018 | 1.834 | # |
| 7080234 | Unknown         | Unknown                                                                                                       | 76   | 0.958 | 3.794 | # |
| 7081328 | Unknown         | Unknown                                                                                                       | 104  | 1.107 | 0.559 | # |
| 7083509 | Unknown         | Unknown                                                                                                       | 69   | 1.005 | 1.673 | # |
| 7088940 | Unknown         | Unknown                                                                                                       | 71   | 1.037 | 2.718 | # |
| 7091841 | Unknown         | Unknown                                                                                                       | 88   | 1.163 | 0.629 | # |
| 7092568 | Unknown         | Unknown                                                                                                       | 55   | 0.848 | 2.562 | # |
| 7105681 | Unknown         | Unknown                                                                                                       | 180  | 0.598 | 0.340 | # |
| 7109374 | Unknown         | Unknown                                                                                                       | 133  | 0.685 | 0.513 | # |
| 7113691 | Unknown         | Unknown                                                                                                       | 214  | 1.244 | 0.590 | # |
| 7113707 | Unknown         | Unknown                                                                                                       | 620  | 1.030 | 0.323 | # |
| 7145048 | Unknown         | Unknown                                                                                                       | 481  | 0.979 | 0.365 | # |
| 7152220 | Unknown         | Unknown                                                                                                       | 37   | 1.512 | 1.716 | # |
| 7157921 | Unknown         | Unknown                                                                                                       | 144  | 0.945 | 2.935 | # |
| 7158264 | Unknown         | Unknown                                                                                                       | 35   | 1.035 | 1.505 | # |
| 7159984 | Unknown         | Unknown                                                                                                       | 64   | 1.191 | 2.182 | # |
| 7164765 | Unknown         | Unknown                                                                                                       | 108  | 0.949 | 1.564 | # |

|         |         |                                          |      |       |       |   |
|---------|---------|------------------------------------------|------|-------|-------|---|
| 7173133 | Unknown | Unknown                                  | 403  | 0.870 | 0.433 | # |
| 7173511 | Unknown | Unknown                                  | 172  | 1.035 | 0.661 | # |
| 7187974 | Unknown | Unknown                                  | 57   | 0.890 | 0.578 | # |
| 7194002 | Unknown | Unknown                                  | 158  | 0.860 | 0.480 | # |
| 7205580 | Unknown | Unknown                                  | 254  | 1.014 | 0.599 | # |
| 7209283 | Unknown | Unknown                                  | 72   | 0.924 | 1.643 | # |
| 7209914 | Unknown | Unknown                                  | 169  | 0.871 | 0.562 | # |
| 7228743 | Unknown | Unknown                                  | 98   | 0.804 | 0.655 | # |
| 7229859 | Unknown | Unknown                                  | 106  | 1.151 | 1.553 | # |
| 7252783 | Unknown | Unknown                                  | 63   | 1.144 | 1.871 | # |
| 7259007 | Unknown | Unknown                                  | 93   | 0.879 | 0.525 | # |
| 7270654 | Unknown | Unknown                                  | 77   | 0.930 | 0.645 | # |
| 7277650 | Unknown | Unknown                                  | 101  | 1.091 | 0.619 | # |
| 7287843 | Unknown | Unknown                                  | 71   | 0.838 | 0.601 | # |
| 7288050 | Unknown | Unknown                                  | 307  | 0.986 | 0.457 | # |
| 7292063 | Unknown | Unknown                                  | 47   | 1.165 | 1.649 | # |
| 7292143 | Unknown | Unknown                                  | 59   | 1.033 | 1.633 | # |
| 7315377 | Unknown | Unknown                                  | 53   | 1.066 | 1.508 | # |
| 7318841 | Unknown | Unknown                                  | 46   | 0.834 | 1.696 | # |
| 7319177 | Unknown | Unknown                                  | 445  | 1.175 | 0.479 | # |
| 7327300 | Unknown | Unknown                                  | 184  | 0.899 | 0.332 | # |
| 7327468 | Unknown | Unknown                                  | 398  | 0.768 | 0.503 | # |
| 7327469 | Unknown | Unknown                                  | 206  | 0.744 | 0.600 | # |
| 7328512 | Unknown | Unknown                                  | 238  | 0.801 | 0.539 | # |
| 7335235 | Unknown | Unknown                                  | 1138 | 0.691 | 0.425 | # |
| 7343801 | Unknown | Unknown                                  | 111  | 0.749 | 0.618 | # |
| 7350634 | Unknown | Unknown                                  | 156  | 0.820 | 0.589 | # |
| 7355170 | Unknown | Unknown                                  | 134  | 1.008 | 0.607 | # |
| 7356789 | Unknown | Unknown                                  | 80   | 0.905 | 2.098 | # |
| 7361426 | Unknown | Unknown                                  | 107  | 0.972 | 2.151 | # |
| 7361747 | Unknown | Unknown                                  | 158  | 1.004 | 0.446 | # |
| 7364445 | Unknown | Unknown                                  | 109  | 0.757 | 0.477 | # |
| 7366359 | Unknown | Unknown                                  | 202  | 0.950 | 0.584 | # |
| 7368920 | Unknown | Unknown                                  | 46   | 1.059 | 1.760 | # |
| 7370451 | Unknown | Unknown                                  | 118  | 1.414 | 1.696 | # |
| 7370467 | Unknown | Unknown                                  | 234  | 0.997 | 2.787 | # |
| 7372037 | Unknown | Unknown                                  | 78   | 1.042 | 2.810 | # |
| 7375683 | Unknown | Unknown                                  | 54   | 1.165 | 1.839 | # |
| 7268578 | Vgll4   | Vestigial like 4 (Drosophila)            | 635  | 0.965 | 0.666 | # |
| 7335234 | Vof16   | Ischemia related factor vof-16           | 672  | 0.688 | 0.427 | # |
| 7035407 | Wee1    | Wee 1 homolog (S. pombe)                 | 334  | 1.017 | 0.626 | # |
| 7349142 | Zbtb38  | Zinc finger and BTB domain containing 38 | 336  | 1.078 | 0.605 | # |
| 7290942 | Zc3h12a | Zinc finger CCCH type containing 12A     | 346  | 0.769 | 0.637 | # |
| 7168453 | Zfp35   | Zinc finger protein 35                   | 185  | 0.965 | 0.592 | # |
| 7049312 | Zfp36   | Zinc finger protein 36                   | 574  | 0.961 | 2.441 | # |
| 7191656 | Zfp455  | Zinc finger protein 455                  | 264  | 1.005 | 0.544 | # |

|         |            |                                                                                |      |       |       |    |
|---------|------------|--------------------------------------------------------------------------------|------|-------|-------|----|
| 7220309 | Zfp57      | Zinc finger protein 57                                                         | 276  | 0.963 | 0.496 | #  |
| 7153504 | Zfp828     | Zinc finger protein 828                                                        | 281  | 0.881 | 0.590 | #  |
| 7041917 | Znf518a    | Zinc finger protein 518A                                                       | 131  | 0.967 | 0.580 | #  |
| 7175874 | Znf608     | Zinc finger protein 608                                                        | 257  | 0.774 | 0.598 | #  |
| 7080749 | Ccl3       | Chemokine (C-C motif) ligand 3                                                 | 842  | 0.610 | 0.721 | *  |
| 7222772 | Chst3      | Carbohydrate (chondroitin 6) sulfotransferase 3                                | 104  | 1.560 | 1.194 | *  |
| 7071906 | Csf3       | Colony stimulating factor 3 (granulocyte)                                      | 139  | 0.661 | 0.706 | *  |
| 7044959 | Ctgf       | Connective tissue growth factor                                                | 2178 | 0.614 | 0.682 | *  |
| 7123885 | Cxcl1      | Chemokine (C-X-C motif) ligand 1 (melanoma growth stimulating activity, alpha) | 1582 | 0.576 | 1.205 | *  |
| 7123883 | Cxcl2      | Chemokine (C-X-C motif) ligand 2                                               | 233  | 0.608 | 0.817 | *  |
| 7302739 | Cyp1b1     | Cytochrome P450, family 1, subfamily b, polypeptide 1                          | 1349 | 1.563 | 0.853 | *  |
| 7215359 | Cyr61      | Cysteine-rich, angiogenic inducer, 61                                          | 2677 | 0.606 | 1.544 | *  |
| 7231589 | Dll4       | Delta-like 4 (Drosophila)                                                      | 381  | 0.369 | 0.840 | *  |
| 7043230 | Dusp5      | Dual specificity phosphatase 5                                                 | 480  | 0.509 | 1.374 | *  |
| 7222466 | Egr2       | Early growth response 2                                                        | 216  | 0.471 | 1.392 | *  |
| 7133143 | Egr3       | Early growth response 3                                                        | 252  | 0.399 | 1.117 | *  |
| 7281135 | Epha2      | Eph receptor A2                                                                | 187  | 0.549 | 0.678 | *  |
| 7281719 | Errfi1     | ERBB receptor feedback inhibitor 1                                             | 2644 | 0.659 | 0.737 | *  |
| 7260080 | Il6        | Interleukin 6                                                                  | 162  | 0.412 | 0.716 | *  |
| 7147838 | Irs2       | Insulin receptor substrate 2                                                   | 288  | 0.621 | 0.817 | *  |
| 7073296 | Kcnj2      | Potassium inwardly-rectifying channel, subfamily J, member 2                   | 490  | 0.427 | 0.427 | *  |
| 7166280 | Klf6       | Kruppel-like factor 6                                                          | 755  | 0.616 | 1.314 | *  |
| 7105681 | Mir181b-1  | MicroRNA mir-181b-1                                                            | 180  | 0.598 | 0.340 | *  |
| 7225165 | Nrarp      | Notch-regulated ankyrin repeat protein                                         | 187  | 0.605 | 0.826 | *  |
| 7120384 | Pik3ip1    | Phosphoinositide-3-kinase interacting protein 1                                | 445  | 1.625 | 0.892 | *  |
| 7290290 | Plk3       | Polo-like kinase 3 (Drosophila)                                                | 244  | 0.492 | 1.145 | *  |
| 7224182 | Prdm1      | PR domain containing 1, with ZNF domain                                        | 90   | 0.644 | 0.917 | *  |
| 7106132 | Ptgs2      | Prostaglandin-endoperoxide synthase 2                                          | 368  | 0.648 | 1.545 | *  |
| 7294961 | RGD1565310 | Similar to RIKEN cDNA 1110018J12                                               | 105  | 1.998 | 0.600 | *  |
| 7112009 | Rgs2       | Regulator of G-protein signaling 2                                             | 421  | 0.537 | 0.954 | *  |
| 7141508 | Spry2      | Sprouty homolog 2 (Drosophila)                                                 | 793  | 0.269 | 0.827 | *  |
| 7216733 | Tnf        | Tumor necrosis factor (TNF superfamily, member 2)                              | 121  | 0.663 | 0.786 | *  |
| 7317342 | Trib1      | Tribbles homolog 1 (Drosophila)                                                | 269  | 0.525 | 0.850 | *  |
| 7031802 | Unknown    | Unknown                                                                        | 113  | 0.564 | 0.815 | *  |
| 7225362 | Unknown    | Unknown                                                                        | 100  | 0.619 | 1.069 | *  |
| 7294269 | Unknown    | Unknown                                                                        | 55   | 1.718 | 1.026 | *  |
| 7369143 | Unknown    | Unknown                                                                        | 105  | 0.628 | 1.262 | *  |
| 7384266 | Unknown    | Unknown                                                                        | 68   | 1.543 | 1.311 | *  |
| 7070340 | Ccl7       | Chemokine (C-C motif) ligand 7                                                 | 1575 | 0.597 | 0.512 | *# |
| 7062006 | Ch25h      | Cholesterol 25-hydroxylase                                                     | 163  | 0.490 | 0.476 | *# |
| 7152119 | Dusp4      | Dual specificity phosphatase 4                                                 | 398  | 0.544 | 0.566 | *# |
| 7314286 | Dusp6      | Dual specificity phosphatase 6                                                 | 1599 | 0.053 | 0.403 | *# |
| 7169197 | Egr1       | Early growth response 1                                                        | 3468 | 0.077 | 3.172 | *# |
| 7322066 | Gadd45b    | Growth arrest and DNA-damage-inducible, beta                                   | 593  | 1.761 | 2.005 | *# |
| 7327675 | Has2       | Hyaluronan synthase 2                                                          | 633  | 0.609 | 0.306 | *# |
| 7179800 | Ier2       | Immediate early response 2                                                     | 204  | 0.592 | 4.463 | *# |



|         |         |                                                                 |      |       |       |    |
|---------|---------|-----------------------------------------------------------------|------|-------|-------|----|
| 7244755 | Il1a    | Interleukin 1 alpha                                             | 170  | 0.534 | 0.588 | *# |
| 7120521 | Lif     | Leukemia inhibitory factor (cholinergic differentiation factor) | 325  | 0.585 | 1.710 | *# |
| 7317471 | Myc     | Myelocytomatosis oncogene                                       | 236  | 0.474 | 0.520 | *# |
| 7261911 | Pdk4    | Pyruvate dehydrogenase kinase, isozyme 4                        | 215  | 1.595 | 1.539 | *# |
| 7314872 | Phlda1  | Pleckstrin homology-like domain, family A, member 1             | 863  | 0.303 | 1.591 | *# |
| 7189518 | Plk2    | Polo-like kinase 2 (Drosophila)                                 | 1934 | 0.583 | 0.605 | *# |
| 7106414 | Rgs16   | Regulator of G-protein signaling 16                             | 603  | 0.598 | 0.448 | *# |
| 7244657 | Unknown | Unknown                                                         | 217  | 0.594 | 0.572 | *# |

### Supplemental Table S3 Effects of PD184352 or BI-D1870 on expression of RNAs induced by ET-1

Analysis was performed using Affymetrix rat exon 1.0 ST microarrays and GeneSpring 12.0, identifying transcripts that were significantly changed by ET-1 at 1 h and then establishing the effects of PD184352 or BI-D1870. The raw data for controls are given and results at each time are the mean fold change relative to the controls (n=3). Statistical analysis for ET-1-responsive transcripts was performed by Student's T-test using a Benjamini and Hochberg false discovery rate correction (FDR<0.05). Identification of significant difference in the presence of PD184352 or BI-D1870 was performed with one-way ANOVA with SNK post-test using a Benjamini and Hochberg false discovery rate correction (FDR<0.05). RNAs were clustered according to effects of inhibitors (cluster 1, inhibited by either PD184352 or BI-D1870; cluster 2, inhibited by PD184352 and not inhibited by BI-D1870; cluster 3, inhibited by PD184352 and enhanced by BI-D1870). \*FDR<0.05 for ET-1 vs ET-1+PD184352; # FDR<0.05 for ET-1 vs ET-1+BI-D1870

| Transcript cluster ID | Gene Symbol | Gene Title                                                                        | Raw data (Control) | PD184352 | BI-D1870 | ET-1  | PD184352 + ET-1 | BI-D1870 + ET-1 | % inhibition PD184352 | % inhibition BI-D1870 | Cluster |    |
|-----------------------|-------------|-----------------------------------------------------------------------------------|--------------------|----------|----------|-------|-----------------|-----------------|-----------------------|-----------------------|---------|----|
| 7091079               | Adamts1     | ADAM metalloproteinase with thrombospondin type 1 motif, 1                        | 1011               | 0.787    | 0.496    | 2.329 | 1.646           | 0.878           | 35.36                 | 71.27                 | 1       | ** |
| 7123129               | Agpat9      | 1-acylglycerol-3-phosphate O-acyltransferase 9                                    | 107                | 1.005    | 0.934    | 2.069 | 1.022           | 1.202           | 98.47                 | 74.95                 | 1       | ** |
| 7275485               | Akap2       | A kinase (PRKA) anchor protein 2                                                  | 1087               | 0.924    | 0.936    | 1.767 | 1.251           | 1.091           | 57.43                 | 79.67                 | 1       | ** |
| 7213945               | Alpk1       | Alpha-kinase 1                                                                    | 161                | 1.070    | 0.926    | 1.581 | 1.322           | 0.920           | 56.57                 | 101.07                | 1       | ** |
| 7060990               | Anxa1       | Annexin A1                                                                        | 978                | 1.056    | 0.958    | 2.287 | 1.267           | 1.195           | 83.59                 | 81.61                 | 1       | ** |
| 7123848               | Areg        | Amphiregulin                                                                      | 156                | 0.855    | 0.976    | 2.968 | 1.160           | 1.135           | 84.50                 | 91.92                 | 1       | ** |
| 7142915               | Arhgef3     | Rho guanine nucleotide exchange factor (GEF) 3                                    | 197                | 0.918    | 0.927    | 2.851 | 1.231           | 0.985           | 83.10                 | 96.86                 | 1       | ** |
| 7218259               | Arid5b      | AT rich interactive domain 5B (Mrf1 like)                                         | 671                | 0.948    | 0.639    | 1.781 | 1.270           | 0.836           | 58.79                 | 74.79                 | 1       | ** |
| 7105894               | B3galt2     | UDP-Gal:betaGlcNAc beta 1,3-galactosyltransferase, polypeptide 2                  | 332                | 0.958    | 0.594    | 1.588 | 1.076           | 0.567           | 79.83                 | 104.61                | 1       | ** |
| 7232862               | Bmp2        | Bone morphogenetic protein 2                                                      | 255                | 0.911    | 0.728    | 2.462 | 1.188           | 1.599           | 81.04                 | 40.44                 | 1       | ** |
| 7193902               | Ccrn4l      | CCR4 carbon catabolite repression 4-like (S. cerevisiae)                          | 222                | 0.871    | 1.059    | 6.898 | 2.202           | 2.719           | 77.43                 | 71.86                 | 1       | ** |
| 7242411               | Cd44        | Cd44 antigen                                                                      | 443                | 0.931    | 1.063    | 2.269 | 1.158           | 1.571           | 82.05                 | 59.95                 | 1       | ** |
| 7110888               | Cd55        | Cd55 antigen                                                                      | 245                | 0.970    | 0.924    | 1.633 | 0.885           | 1.057           | 113.48                | 78.91                 | 1       | ** |
| 7025269               | Cited2      | Cbp/p300-interacting transactivator, with Glu/Asp-rich carboxy-terminal domain, 2 | 1997               | 0.905    | 0.763    | 3.119 | 1.993           | 2.389           | 48.61                 | 23.28                 | 1       | ** |
| 7045969               | Cnksr3      | Cnksr family member 3                                                             | 316                | 0.933    | 0.775    | 1.524 | 1.274           | 0.897           | 35.02                 | 76.70                 | 1       | ** |
| 7077481               | Csf2        | Colony stimulating factor 2 (granulocyte-macrophage)                              | 35                 | 0.985    | 1.049    | 1.611 | 1.044           | 1.106           | 90.35                 | 90.65                 | 1       | ** |
| 7108644               | Dusp10      | Dual specificity phosphatase 10                                                   | 374                | 1.097    | 0.626    | 3.478 | 1.160           | 1.241           | 97.45                 | 75.17                 | 1       | ** |
| 7152119               | Dusp4       | Dual specificity phosphatase 4                                                    | 398                | 0.544    | 0.566    | 1.957 | 0.766           | 0.796           | 76.78                 | 75.96                 | 1       | ** |
| 7314286               | Dusp6       | Dual specificity phosphatase 6                                                    | 1599               | 0.053    | 0.403    | 2.142 | 0.147           | 0.841           | 91.72                 | 61.65                 | 1       | ** |
| 7163221               | Edn1        | Endothelin 1                                                                      | 180                | 0.826    | 0.653    | 2.927 | 1.526           | 1.302           | 63.65                 | 66.33                 | 1       | ** |
| 7147985               | Efnb2       | Ephrin B2                                                                         | 232                | 1.055    | 0.939    | 1.563 | 1.061           | 1.129           | 98.88                 | 66.30                 | 1       | ** |
| 7259141               | Emp1        | Epithelial membrane protein 1                                                     | 2218               | 0.961    | 0.985    | 2.134 | 1.083           | 1.059           | 89.22                 | 93.49                 | 1       | ** |
| 7281135               | Epha2       | Eph receptor A2                                                                   | 187                | 0.549    | 0.678    | 2.111 | 0.767           | 1.493           | 80.36                 | 26.67                 | 1       | ** |
| 7123853               | Ereg        | Epiregulin                                                                        | 222                | 0.789    | 1.309    | 4.888 | 1.444           | 3.611           | 83.14                 | 40.80                 | 1       | ** |
| 7281719               | Errfi1      | ERBB receptor feedback inhibitor 1                                                | 2644               | 0.659    | 0.737    | 3.615 | 1.776           | 2.728           | 57.27                 | 23.89                 | 1       | ** |

|         |                      |                                                                                                 |     |       |       |       |       |       |        |        |   |    |
|---------|----------------------|-------------------------------------------------------------------------------------------------|-----|-------|-------|-------|-------|-------|--------|--------|---|----|
| 7334452 | Ets1                 | v-ets erythroblastosis virus E26 oncogene homolog 1 (avian)                                     | 946 | 0.888 | 0.763 | 1.738 | 0.996 | 1.056 | 85.42  | 60.37  | 1 | ** |
| 7198615 | F3                   | Coagulation factor III (thromboplastin, tissue factor)                                          | 158 | 1.090 | 0.638 | 3.488 | 2.236 | 1.086 | 53.96  | 82.00  | 1 | ** |
| 7297136 | Fam110c              | Family with sequence similarity 110, member C                                                   | 140 | 1.092 | 0.595 | 3.770 | 2.502 | 0.857 | 49.09  | 90.53  | 1 | ** |
| 7260805 | Fgl2                 | Fibrinogen-like 2                                                                               | 317 | 1.040 | 0.927 | 1.932 | 1.200 | 1.171 | 82.92  | 73.81  | 1 | ** |
| 7039170 | Fosl1                | Fos-like antigen 1                                                                              | 279 | 0.672 | 0.699 | 6.216 | 1.139 | 1.189 | 91.04  | 90.60  | 1 | ** |
| 7299050 | Frmf6                | FERM domain containing 6                                                                        | 243 | 0.957 | 1.072 | 1.596 | 1.079 | 1.361 | 79.43  | 51.65  | 1 | ** |
| 7204090 | Fst                  | Follistatin                                                                                     | 263 | 0.796 | 0.823 | 4.306 | 1.091 | 0.930 | 91.08  | 96.76  | 1 | ** |
| 7163357 | Gcnt2                | Glucosaminyl (N-acetyl) transferase 2, l-branching enzyme                                       | 135 | 0.904 | 0.612 | 1.743 | 1.422 | 0.806 | 30.30  | 73.86  | 1 | ** |
| 7187674 | Glrx1                | Glutaredoxin 1                                                                                  | 328 | 1.101 | 1.063 | 1.782 | 1.008 | 1.070 | 111.94 | 99.04  | 1 | ** |
| 7248966 | Gmeb2                | Glucocorticoid modulatory element binding protein 2                                             | 245 | 1.023 | 0.835 | 1.568 | 1.147 | 0.942 | 78.22  | 81.12  | 1 | ** |
| 7280238 | Gpr3                 | G protein-coupled receptor 3                                                                    | 126 | 0.978 | 0.798 | 2.046 | 1.167 | 1.439 | 81.92  | 38.69  | 1 | ** |
| 7243216 | Grem1                | Gremlin 1, cysteine knot superfamily, homolog (Xenopus laevis)                                  | 91  | 0.902 | 0.842 | 1.861 | 1.380 | 0.944 | 44.48  | 88.17  | 1 | ** |
| 7327675 | Has2                 | Hyaluronan synthase 2                                                                           | 633 | 0.609 | 0.306 | 8.374 | 3.782 | 0.651 | 56.97  | 95.32  | 1 | ** |
| 7174562 | Hbegf                | Heparin-binding EGF-like growth factor                                                          | 488 | 0.798 | 0.774 | 3.676 | 1.662 | 2.573 | 67.68  | 32.75  | 1 | ** |
| 7266497 | Hk2                  | Hexokinase 2                                                                                    | 541 | 0.850 | 0.804 | 1.719 | 0.915 | 0.930 | 91.00  | 82.53  | 1 | ** |
| 7202670 | Hmgcr                | 3-hydroxy-3-methylglutaryl-Coenzyme A reductase                                                 | 713 | 0.952 | 0.940 | 1.691 | 1.235 | 1.186 | 59.12  | 64.50  | 1 | ** |
| 7150903 | Hpgd                 | hydroxyprostaglandin dehydrogenase 15 (NAD)                                                     | 51  | 1.137 | 0.934 | 1.571 | 1.086 | 0.943 | 109.07 | 98.45  | 1 | ** |
| 7216806 | Hspa1b Hspa1a Hspa1l | Heat shock 70kD protein 1B (mapped)   heat shock 70kD protein 1A   heat shock protein 1-like    | 86  | 1.045 | 1.090 | 2.629 | 1.795 | 1.704 | 53.98  | 62.27  | 1 | ** |
| 7133438 | Htr2a                | 5-hydroxytryptamine (serotonin) receptor 2A                                                     | 778 | 0.701 | 0.559 | 1.622 | 0.885 | 0.764 | 70.34  | 67.12  | 1 | ** |
| 7194929 | Il12a                | Interleukin 12a                                                                                 | 99  | 0.710 | 0.585 | 1.528 | 0.892 | 0.692 | 65.63  | 79.85  | 1 | ** |
| 7353844 | Il1rl1               | Interleukin 1 receptor-like 1                                                                   | 428 | 1.065 | 1.003 | 2.991 | 1.098 | 1.655 | 98.36  | 67.25  | 1 | ** |
| 7192049 | Il7                  | Interleukin 7                                                                                   | 75  | 0.959 | 0.917 | 1.558 | 0.937 | 0.987 | 104.03 | 87.52  | 1 | ** |
| 7165193 | Inhba                | Inhibin beta-A                                                                                  | 310 | 0.694 | 0.706 | 6.472 | 2.227 | 1.489 | 71.99  | 85.68  | 1 | ** |
| 7134502 | Klf5                 | Kruppel-like factor 5                                                                           | 334 | 1.059 | 0.853 | 2.308 | 1.157 | 0.955 | 92.50  | 92.17  | 1 | ** |
| 7210664 | Lmna                 | Lamin A                                                                                         | 802 | 1.074 | 0.997 | 1.609 | 1.285 | 1.149 | 65.36  | 75.03  | 1 | ** |
| 7352509 | LOC688459            | Hypothetical protein LOC688459                                                                  | 51  | 0.974 | 0.892 | 2.968 | 1.190 | 1.085 | 89.05  | 90.18  | 1 | ** |
| 7318753 | Maff                 | v-maf musculoaponeurotic fibrosarcoma oncogene homolog F (avian)                                | 151 | 0.859 | 0.946 | 2.073 | 1.050 | 1.558 | 82.18  | 42.96  | 1 | ** |
| 7100653 | Mafk                 | v-maf musculoaponeurotic fibrosarcoma oncogene homolog K (avian)                                | 729 | 0.739 | 0.916 | 1.745 | 1.108 | 1.123 | 50.32  | 72.23  | 1 | ** |
| 7067118 | Mgat1                | Mannosyl (alpha-1,3-)-glycoprotein beta-1,2-N-acetylglucosaminyltransferase                     | 363 | 1.019 | 0.938 | 1.976 | 1.382 | 0.949 | 62.80  | 98.92  | 1 | ** |
| 7070060 | Mir193               | MicroRNA mir-193                                                                                | 118 | 0.993 | 0.642 | 2.329 | 1.370 | 0.760 | 71.56  | 91.13  | 1 | ** |
| 7135292 | Mir19b-1             | MicroRNA mir-19b-1                                                                              | 41  | 0.845 | 0.901 | 1.506 | 1.043 | 0.751 | 60.88  | 129.57 | 1 | ** |
| 7373217 | Mir222               | MicroRNA mir-222                                                                                | 37  | 1.039 | 1.007 | 2.970 | 0.979 | 1.603 | 103.07 | 69.76  | 1 | ** |
| 7288447 | Mir31                | MicroRNA mir-31                                                                                 | 102 | 0.680 | 0.602 | 2.354 | 1.140 | 0.827 | 66.06  | 83.41  | 1 | ** |
| 7211447 | Mllt11               | Myeloid/lymphoid or mixed-lineage leukemia (trithorax homolog, Drosophila); translocated to, 11 | 506 | 0.955 | 0.665 | 1.608 | 1.142 | 0.734 | 69.27  | 88.67  | 1 | ** |
| 7274970 | Murc                 | Muscle-related coiled-coil protein                                                              | 145 | 1.014 | 0.972 | 1.684 | 1.048 | 0.929 | 95.02  | 106.29 | 1 | ** |
| 7317471 | Myc                  | Myelocytomatosis oncogene                                                                       | 236 | 0.474 | 0.520 | 2.908 | 1.056 | 1.498 | 69.47  | 48.76  | 1 | ** |
| 7297245 | Nampt                | Nicotinamide phosphoribosyltransferase                                                          | 535 | 1.045 | 1.007 | 1.536 | 0.948 | 1.191 | 117.94 | 65.89  | 1 | ** |
| 7197523 | Ngf                  | Nerve growth factor (beta polypeptide)                                                          | 104 | 0.834 | 0.624 | 1.716 | 0.831 | 0.891 | 100.36 | 62.73  | 1 | ** |
| 7235566 | Pard6b               | Par-6 (partitioning defective 6) homolog beta (C. elegans)                                      | 103 | 1.110 | 1.100 | 3.545 | 1.136 | 1.631 | 98.97  | 79.10  | 1 | ** |
| 7283909 | Pdp1                 | Pyruvate dehydrogenase phosphatase catalytic                                                    | 603 | 0.928 | 0.761 | 1.701 | 0.759 | 0.687 | 124.00 | 110.49 | 1 | ** |

|         |             |                                                                                |      |       |       |        |       |       |        |        |   |    |
|---------|-------------|--------------------------------------------------------------------------------|------|-------|-------|--------|-------|-------|--------|--------|---|----|
|         |             | subunit 1                                                                      |      |       |       |        |       |       |        |        |   |    |
| 7121583 | Peli1       | Pellino 1                                                                      | 115  | 0.970 | 1.139 | 1.611  | 1.303 | 1.363 | 45.52  | 63.41  | 1 | ** |
| 7068987 | Per1        | Period homolog 1 (Drosophila)                                                  | 175  | 1.035 | 0.966 | 1.506  | 1.277 | 1.070 | 52.28  | 79.52  | 1 | ** |
| 7278671 | Pik3r3      | Phosphoinositide-3-kinase, regulatory subunit 3 (gamma)                        | 352  | 1.088 | 0.885 | 1.545  | 1.130 | 1.021 | 92.41  | 75.09  | 1 | ** |
| 7152038 | Pragmin     | Pragma of Rnd2                                                                 | 224  | 0.793 | 0.648 | 1.969  | 0.826 | 0.704 | 96.55  | 94.27  | 1 | ** |
| 7048738 | PVR         | Poliovirus receptor                                                            | 1193 | 0.843 | 1.040 | 1.858  | 1.088 | 1.603 | 71.44  | 34.33  | 1 | ** |
| 7064324 | RGD1308127  | Similar to 2700078E11Rik protein                                               | 472  | 0.967 | 0.891 | 1.649  | 1.028 | 1.140 | 90.59  | 61.53  | 1 | ** |
| 7284153 | Ripk2       | Receptor-interacting serine-threonine kinase 2                                 | 437  | 0.923 | 0.855 | 2.704  | 0.945 | 1.038 | 98.72  | 89.30  | 1 | ** |
| 7220337 | Rnf39       | Ring finger protein 39                                                         | 161  | 0.882 | 0.763 | 1.548  | 0.991 | 0.775 | 80.02  | 97.76  | 1 | ** |
| 7196707 | S100a10     | S100 calcium binding protein A10                                               | 865  | 1.154 | 1.176 | 1.744  | 1.188 | 1.474 | 95.55  | 60.00  | 1 | ** |
| 7144691 | Sc4mol      | Sterol-C4-methyl oxidase-like                                                  | 1802 | 0.997 | 0.856 | 1.534  | 1.058 | 1.080 | 88.52  | 58.25  | 1 | ** |
| 7103916 | Serpinb2    | Serine (or cysteine) peptidase inhibitor, clade B, member 2                    | 224  | 0.777 | 1.122 | 14.648 | 1.463 | 4.071 | 94.97  | 78.39  | 1 | ** |
| 7045121 | Sgk1        | Serum/glucocorticoid regulated kinase 1                                        | 909  | 0.836 | 0.563 | 3.087  | 0.905 | 1.287 | 96.68  | 65.31  | 1 | ** |
| 7170785 | Slc12a2     | Solute carrier family 12 (sodium/potassium/chloride transporters), member 2    | 370  | 0.971 | 0.974 | 1.924  | 1.289 | 1.048 | 65.58  | 91.97  | 1 | ** |
| 7232493 | Slc20a1     | Solute carrier family 20 (phosphate transporter), member 1                     | 1253 | 0.845 | 0.784 | 1.640  | 0.949 | 1.022 | 83.80  | 62.81  | 1 | ** |
| 7269356 | Slc2a3      | Solute carrier family 2 (facilitated glucose transporter), member 3            | 230  | 0.871 | 1.002 | 1.565  | 0.879 | 1.113 | 98.46  | 80.38  | 1 | ** |
| 7136592 | Slc4a7      | Solute carrier family 4, sodium bicarbonate cotransporter, member 7            | 147  | 0.994 | 1.180 | 1.795  | 1.162 | 1.363 | 78.81  | 76.92  | 1 | ** |
| 7096358 | Slc7a1      | Solute carrier family 7 (cationic amino acid transporter, y+ system), member 1 | 767  | 0.984 | 0.838 | 1.603  | 1.261 | 0.979 | 54.12  | 76.58  | 1 | ** |
| 7187663 | Snrpd1 EII2 | Small nuclear ribonucleoprotein D1   elongation factor RNA polymerase II 2     | 254  | 1.009 | 1.037 | 2.330  | 1.264 | 1.657 | 80.83  | 53.37  | 1 | ** |
| 7141508 | Spry2       | Sprouty homolog 2 (Drosophila)                                                 | 793  | 0.269 | 0.827 | 2.108  | 0.804 | 1.267 | 51.70  | 60.27  | 1 | ** |
| 7265169 | Spty2d1     | SPT2, Suppressor of Ty, domain containing 1 (S. cerevisiae)                    | 175  | 1.001 | 0.983 | 1.504  | 1.100 | 1.168 | 80.22  | 63.33  | 1 | ** |
| 7308910 | Tgfb3       | Transforming growth factor, beta 3                                             | 444  | 1.027 | 0.949 | 2.085  | 1.280 | 0.937 | 76.69  | 101.09 | 1 | ** |
| 7246265 | Thbd        | Thrombomodulin                                                                 | 83   | 0.911 | 0.750 | 1.796  | 1.123 | 0.892 | 73.40  | 82.28  | 1 | ** |
| 7287386 | Tnfsf15     | Tumor necrosis factor (ligand) superfamily, member 15                          | 189  | 0.901 | 0.841 | 1.903  | 1.345 | 0.793 | 50.89  | 105.34 | 1 | ** |
| 7106964 | Tnfsf18     | Tumor necrosis factor (ligand) superfamily, member 18                          | 91   | 0.897 | 0.957 | 7.906  | 1.598 | 1.436 | 89.85  | 93.07  | 1 | ** |
| 7297329 | Twist1      | Twist homolog 1 (Drosophila)                                                   | 282  | 0.985 | 0.813 | 3.588  | 1.217 | 1.059 | 91.05  | 90.49  | 1 | ** |
| 7061626 | Unknown     | Unknown                                                                        | 56   | 0.862 | 0.703 | 1.557  | 0.931 | 0.714 | 87.65  | 98.05  | 1 | ** |
| 7085832 | Unknown     | Unknown                                                                        | 121  | 0.650 | 0.587 | 1.531  | 0.762 | 0.752 | 78.94  | 68.91  | 1 | ** |
| 7105586 | Unknown     | Unknown                                                                        | 327  | 0.918 | 0.694 | 2.623  | 1.058 | 0.837 | 91.40  | 91.14  | 1 | ** |
| 7111633 | Unknown     | Unknown                                                                        | 104  | 0.863 | 0.914 | 1.961  | 1.197 | 0.891 | 65.25  | 102.34 | 1 | ** |
| 7212310 | Unknown     | Unknown                                                                        | 246  | 1.251 | 0.713 | 2.197  | 1.317 | 1.022 | 94.45  | 74.15  | 1 | ** |
| 7235911 | Unknown     | Unknown                                                                        | 176  | 0.954 | 0.817 | 1.646  | 1.110 | 0.723 | 75.88  | 114.49 | 1 | ** |
| 7244657 | Unknown     | Unknown                                                                        | 217  | 0.594 | 0.572 | 2.127  | 0.810 | 0.808 | 80.81  | 79.04  | 1 | ** |
| 7268354 | Unknown     | Unknown                                                                        | 67   | 0.939 | 0.889 | 2.116  | 1.222 | 1.305 | 74.70  | 62.73  | 1 | ** |
| 7270654 | Unknown     | Unknown                                                                        | 77   | 0.930 | 0.645 | 1.516  | 0.835 | 0.595 | 118.26 | 109.67 | 1 | ** |
| 7297222 | Unknown     | Unknown                                                                        | 177  | 0.958 | 0.751 | 2.738  | 0.962 | 0.772 | 99.79  | 98.82  | 1 | ** |
| 7297247 | Unknown     | Unknown                                                                        | 173  | 1.017 | 0.909 | 2.978  | 1.020 | 1.728 | 99.85  | 58.60  | 1 | ** |
| 7327468 | Unknown     | Unknown                                                                        | 398  | 0.768 | 0.503 | 1.527  | 1.022 | 0.887 | 51.86  | 27.19  | 1 | ** |
| 7327469 | Unknown     | Unknown                                                                        | 206  | 0.744 | 0.600 | 1.551  | 1.037 | 0.855 | 46.79  | 53.71  | 1 | ** |
| 7335235 | Unknown     | Unknown                                                                        | 1138 | 0.691 | 0.425 | 2.664  | 1.014 | 0.604 | 80.62  | 89.20  | 1 | ** |
| 7361747 | Unknown     | Unknown                                                                        | 158  | 1.004 | 0.446 | 1.688  | 1.339 | 0.774 | 51.16  | 52.32  | 1 | ** |

|         |                             |                                                                                     |      |       |       |        |       |        |        |        |   |    |
|---------|-----------------------------|-------------------------------------------------------------------------------------|------|-------|-------|--------|-------|--------|--------|--------|---|----|
| 7136062 | Vcl                         | Vinculin                                                                            | 1093 | 0.997 | 1.018 | 1.783  | 1.443 | 1.259  | 43.01  | 69.15  | 1 | ** |
| 7151046 | Vegfc                       | vascular endothelial growth factor C                                                | 169  | 1.014 | 0.965 | 1.564  | 1.274 | 0.894  | 53.87  | 112.63 | 1 | ** |
| 7085544 | Vgll3                       | Vestigial like 3 (Drosophila)                                                       | 651  | 0.969 | 0.913 | 2.358  | 1.760 | 1.090  | 41.76  | 87.01  | 1 | ** |
| 7128932 | Rel                         | Rel v-rel reticuloendotheliosis viral oncogene homolog (avian)                      | 206  | 1.078 | 0.951 | 2.022  | 1.520 | 1.109  | 56.71  | 84.57  | 1 | ** |
| 7105589 | Zfp281                      | Zinc finger protein 281                                                             | 659  | 0.763 | 0.707 | 2.166  | 1.082 | 0.937  | 72.67  | 80.27  | 1 | ** |
| 7197294 | Znf697                      | Zinc finger protein 697                                                             | 263  | 0.781 | 0.956 | 2.076  | 1.132 | 1.420  | 67.35  | 56.91  | 1 | ** |
| 7370009 | Ankrd57                     | Ankyrin repeat domain 57                                                            | 149  | 0.876 | 0.998 | 1.636  | 1.168 | 1.401  | 54.12  | 36.67  | 2 | *  |
| 7160453 | Arl5b                       | ADP-ribosylation factor-like 5B                                                     | 375  | 0.875 | 0.983 | 1.813  | 1.165 | 1.516  | 64.34  | 34.41  | 2 | *  |
| 7024628 | Atp13a3 LOC678704 LOC292449 | ATPase type 13A3   hypothetical protein LOC678704   similar to hypothetical protein | 268  | 0.908 | 1.047 | 1.591  | 0.918 | 1.217  | 98.36  | 71.18  | 2 | *  |
| 7145493 | Cdkn2aip                    | CDKN2A interacting protein                                                          | 212  | 1.117 | 2.218 | 1.525  | 1.239 | 2.766  | 76.75  | -4.42  | 2 | ** |
| 7039008 | Cicf1                       | Cardiotrophin-like cytokine factor 1                                                | 152  | 0.869 | 0.906 | 1.535  | 0.919 | 1.369  | 90.61  | 13.64  | 2 | *  |
| 7354636 | Coq10b                      | Coenzyme Q10 homolog B (S. cerevisiae)                                              | 316  | 0.939 | 1.399 | 2.261  | 1.592 | 2.588  | 48.18  | 5.76   | 2 | *  |
| 7350918 | Csrp1                       | Cysteine-serine-rich nuclear protein 1                                              | 269  | 1.140 | 1.658 | 4.430  | 2.264 | 5.023  | 67.23  | 1.90   | 2 | ** |
| 7133143 | Egr3                        | Early growth response 3                                                             | 252  | 0.399 | 1.117 | 17.163 | 1.398 | 13.662 | 93.82  | 22.38  | 2 | *  |
| 7345585 | Fdx1                        | Ferredoxin 1                                                                        | 198  | 0.918 | 1.038 | 3.649  | 1.087 | 5.210  | 93.61  | -57.49 | 2 | *  |
| 7252051 | Flnc                        | Filamin C, gamma                                                                    | 1068 | 0.989 | 0.959 | 1.564  | 0.943 | 1.416  | 108.19 | 18.99  | 2 | *  |
| 7048605 | Fosb                        | FBJ osteosarcoma oncogene B                                                         | 95   | 1.346 | 2.295 | 24.665 | 6.815 | 29.434 | 76.89  | -14.68 | 2 | *  |
| 7333460 | Icam1                       | Intercellular adhesion molecule 1                                                   | 1512 | 0.833 | 1.169 | 1.756  | 1.269 | 1.759  | 42.30  | 21.97  | 2 | *  |
| 7112556 | Ier5                        | Immediate early response 5                                                          | 342  | 0.910 | 1.054 | 1.800  | 1.235 | 1.908  | 59.33  | -6.74  | 2 | *  |
| 7028549 | Il11                        | Interleukin 11                                                                      | 184  | 0.862 | 1.312 | 2.013  | 1.158 | 2.179  | 70.74  | 14.36  | 2 | *  |
| 7260080 | Il6                         | Interleukin 6                                                                       | 162  | 0.412 | 0.716 | 4.749  | 2.562 | 4.670  | 42.67  | -5.44  | 2 | *  |
| 7147838 | Irs2                        | Insulin receptor substrate 2                                                        | 288  | 0.621 | 0.817 | 1.728  | 1.164 | 1.315  | 25.54  | 31.52  | 2 | *  |
| 7286480 | Klf4                        | Kruppel-like factor 4 (gut)                                                         | 275  | 1.079 | 1.599 | 3.635  | 2.551 | 4.224  | 44.15  | 0.38   | 2 | ** |
| 7257290 | Lmcd1                       | LIM and cysteine-rich domains 1                                                     | 683  | 0.910 | 0.805 | 3.072  | 1.831 | 2.661  | 55.53  | 10.41  | 2 | *  |
| 7335998 | LOC363060                   | Similar to RIKEN cDNA 1600029D21                                                    | 168  | 0.885 | 1.096 | 1.718  | 1.043 | 1.650  | 77.96  | 22.80  | 2 | *  |
| 7325416 | Mdm2                        | Mdm2 p53 binding protein homolog (mouse)                                            | 250  | 1.056 | 0.978 | 1.644  | 1.082 | 1.692  | 95.95  | -10.86 | 2 | *  |
| 7194351 | Mei1 Tsc22d2                | Meiosis inhibitor 1   TSC22 domain family, member 2                                 | 326  | 0.948 | 1.041 | 2.165  | 1.237 | 2.472  | 75.18  | -22.82 | 2 | *  |
| 7185182 | Nqo1                        | NAD(P)H dehydrogenase, quinone 1                                                    | 278  | 1.143 | 1.090 | 1.515  | 1.234 | 1.231  | 82.32  | 72.78  | 2 | *  |
| 7270053 | Olr1                        | Oxidized low density lipoprotein (lectin-like) receptor 1                           | 1942 | 0.816 | 1.247 | 1.536  | 1.051 | 1.955  | 56.09  | -32.19 | 2 | *  |
| 7189518 | Plk2                        | Polo-like kinase 2 (Drosophila)                                                     | 1934 | 0.583 | 0.605 | 2.925  | 1.700 | 2.358  | 41.94  | 8.94   | 2 | *  |
| 7106132 | Ptgs2                       | Prostaglandin-endoperoxide synthase 2                                               | 368  | 0.648 | 1.545 | 8.007  | 2.554 | 10.021 | 72.80  | -20.96 | 2 | *  |
| 7112009 | Rgs2                        | Regulator of G-protein signaling 2                                                  | 421  | 0.537 | 0.954 | 5.498  | 1.966 | 4.588  | 68.23  | 19.19  | 2 | *  |
| 7331581 | Rnd1                        | Rho family GTPase 1                                                                 | 622  | 0.948 | 0.938 | 2.207  | 1.454 | 1.739  | 58.04  | 33.59  | 2 | *  |
| 7238766 | Rnd3                        | Rho family GTPase 3                                                                 | 885  | 0.825 | 0.778 | 1.830  | 0.940 | 1.642  | 86.11  | -4.10  | 2 | *  |
| 7029999 | Sertad1                     | SERTA domain containing 1                                                           | 191  | 1.080 | 1.513 | 1.590  | 1.088 | 1.890  | 98.68  | 36.07  | 2 | *  |
| 7214260 | Sgms2                       | Sphingomyelin synthase 2                                                            | 125  | 0.988 | 0.970 | 1.777  | 0.953 | 1.428  | 104.45 | 41.06  | 2 | *  |
| 7221460 | Sik1                        | Salt-inducible kinase 1                                                             | 727  | 0.941 | 1.047 | 2.044  | 1.245 | 2.154  | 70.83  | -6.05  | 2 | *  |
| 7261795 | Tfpi2                       | Tissue factor pathway inhibitor 2                                                   | 154  | 0.713 | 0.826 | 2.044  | 0.838 | 2.198  | 88.05  | -31.41 | 2 | *  |
| 7075088 | Tnfrsf12a                   | Tumor necrosis factor receptor superfamily, member 12a                              | 1569 | 0.917 | 1.177 | 1.767  | 1.263 | 1.594  | 54.94  | 45.57  | 2 | *  |
| 7272734 | Tp53inp1                    | Tumor protein p53 inducible nuclear protein 1                                       | 978  | 1.058 | 0.960 | 1.532  | 1.177 | 1.013  | 77.61  | 89.99  | 2 | *  |
| 7113823 | Uap1                        | UDP-N-acetylglucosamine pyrophosphorylase 1                                         | 347  | 0.904 | 1.591 | 3.229  | 1.237 | 3.030  | 85.04  | 35.42  | 2 | *  |
| 7118521 | Ugdh                        | UDP-glucose dehydrogenase                                                           | 815  | 1.025 | 1.013 | 1.552  | 1.205 | 1.452  | 67.34  | 20.50  | 2 | *  |
| 7135004 | Unknown                     | Unknown                                                                             | 41   | 0.850 | 1.401 | 1.503  | 0.904 | 1.416  | 89.19  | 96.95  | 2 | *  |
| 7194194 | Unknown                     | Unknown                                                                             | 93   | 1.225 | 0.740 | 2.485  | 1.334 | 1.785  | 92.68  | 29.61  | 2 | *  |
| 7350922 | Xirp1                       | Xin actin-binding repeat containing 1                                               | 857  | 0.820 | 0.981 | 1.929  | 0.997 | 2.334  | 80.89  | -45.62 | 2 | *  |
| 7096947 | Zfand2a                     | Zinc finger, AN1-type domain 2A                                                     | 710  | 0.969 | 1.181 | 1.709  | 1.172 | 1.584  | 71.31  | 43.07  | 2 | *  |

|         |            |                                                                                     |      |       |       |       |       |        |        |         |      |    |
|---------|------------|-------------------------------------------------------------------------------------|------|-------|-------|-------|-------|--------|--------|---------|------|----|
| 7259100 | Apold1     | Apolipoprotein L domain containing 1                                                | 198  | 1.027 | 1.185 | 2.040 | 1.460 | 2.967  | 58.43  | -71.30  | 3    | ** |
| 7328919 | Arc        | Activity-regulated cytoskeleton-associated protein                                  | 67   | 1.010 | 2.254 | 7.297 | 1.464 | 25.754 | 92.79  | -273.17 | 3    | ** |
| 7111272 | Btg2       | BTG family, member 2                                                                | 448  | 0.740 | 1.918 | 5.348 | 2.093 | 9.128  | 68.87  | -65.85  | 3    | ** |
| 7043230 | Dusp5      | Dual specificity phosphatase 5                                                      | 480  | 0.509 | 1.374 | 4.689 | 0.821 | 7.689  | 91.53  | -71.15  | 3    | ** |
| 7222466 | Egr2       | Early growth response 2                                                             | 216  | 0.471 | 1.392 | 5.083 | 0.736 | 7.508  | 93.49  | -49.81  | 3    | ** |
| 7300295 | Fos        | FBJ osteosarcoma oncogene                                                           | 175  | 0.815 | 2.153 | 2.896 | 2.083 | 13.849 | 33.16  | -516.92 | 3    | ** |
| 7265600 | Gadd45a    | Growth arrest and DNA-damage-inducible, alpha                                       | 617  | 0.989 | 1.303 | 1.815 | 0.928 | 2.475  | 107.39 | -43.87  | 3    | ** |
| 7338247 | Gclc       | Glutamate-cysteine ligase, catalytic subunit                                        | 989  | 0.982 | 1.118 | 1.651 | 1.000 | 2.476  | 97.31  | -108.58 | 3    | ** |
| 7120521 | Lif        | Leukemia inhibitory factor (cholinergic differentiation factor)                     | 325  | 0.585 | 1.710 | 4.964 | 1.107 | 7.272  | 86.85  | -40.32  | 3    | ** |
| 7239111 | Nr4a2      | Nuclear receptor subfamily 4, group A, member 2                                     | 155  | 1.267 | 2.867 | 9.338 | 3.863 | 30.993 | 68.86  | -237.31 | 3    | ** |
| 7274931 | Nr4a3      | Nuclear receptor subfamily 4, group A, member 3                                     | 141  | 0.869 | 1.955 | 7.160 | 3.525 | 15.172 | 56.88  | -114.58 | 3    | ** |
| 7314872 | Phlda1     | Pleckstrin homology-like domain, family A, member 1                                 | 863  | 0.303 | 1.591 | 4.220 | 0.621 | 5.931  | 90.11  | -34.79  | 3    | ** |
| 7217331 | Pim1       | Pim-1 oncogene                                                                      | 1911 | 1.198 | 0.832 | 1.653 | 1.462 | 2.180  | 59.58  | -106.37 | 3    | ** |
| 7051029 | Ppp1r15a   | Protein phosphatase 1, regulatory (inhibitor) subunit 15A                           | 368  | 0.884 | 1.395 | 2.040 | 1.676 | 2.849  | 23.83  | -39.89  | 3    | ** |
| 7354851 | Ptp4a1     | Protein tyrosine phosphatase 4a1                                                    | 921  | 1.044 | 1.138 | 1.827 | 1.027 | 2.572  | 102.11 | -73.37  | 3    | ** |
| 7308679 | RGD1306119 | Similar to transcriptional regulating protein 132                                   | 223  | 0.996 | 1.308 | 1.529 | 0.934 | 2.198  | 111.74 | -68.35  | 3    | ** |
| 7375057 | Sat1       | Spermidine/spermine N1-acetyl transferase 1                                         | 463  | 0.989 | 1.452 | 2.466 | 1.208 | 3.413  | 85.08  | -33.71  | 3    | ** |
| 7233921 | Srxn1      | Sulfiredoxin 1 homolog (S. cerevisiae)                                              | 120  | 1.039 | 1.871 | 2.154 | 1.313 | 6.781  | 76.23  | -325.59 | 3    | ** |
| 7323040 | Timp3      | TIMP metalloproteinase inhibitor 3                                                  | 1753 | 0.971 | 0.973 | 1.669 | 1.300 | 2.188  | 50.89  | -81.41  | 3    | ** |
| 7317342 | Trib1      | Tribbles homolog 1 (Drosophila)                                                     | 269  | 0.525 | 0.850 | 2.721 | 0.878 | 4.552  | 79.45  | -115.10 | 3    | ** |
| 7049312 | Zfp36      | Zinc finger protein 36                                                              | 574  | 0.961 | 2.441 | 2.569 | 1.792 | 5.794  | 47.02  | -113.77 | 3    | ** |
| 7327038 | Abra       | Actin-binding Rho activating protein                                                | 87   | 0.948 | 0.800 | 1.798 | 1.268 | 0.972  | 59.95  | 78.38   | None | #  |
| 7160892 | Apbb1ip    | Amyloid beta (A4) precursor protein-binding, family B, member 1 interacting protein | 103  | 0.998 | 0.856 | 1.509 | 1.285 | 0.842  | 43.78  | 102.72  | None | #  |
| 7353382 | Arid5a     | AT rich interactive domain 5A (Mrf1 like)                                           | 374  | 0.832 | 1.121 | 1.545 | 1.431 | 1.994  | -9.91  | -60.31  | None | #  |
| 7115455 | Atf3       | Activating transcription factor 3                                                   | 599  | 1.161 | 2.728 | 7.194 | 4.575 | 15.559 | 44.89  | -107.15 | None | #  |
| 7301401 | Bdkrb1     | Bradykinin receptor B1                                                              | 47   | 1.062 | 0.997 | 1.506 | 1.311 | 1.061  | 50.96  | 87.33   | None | #  |
| 7070340 | Ccl7       | Chemokine (C-C motif) ligand 7                                                      | 1575 | 0.597 | 0.512 | 1.530 | 1.041 | 0.803  | 16.09  | 45.17   | None | ** |
| 7209338 | Ccnl1      | Cyclin L1                                                                           | 785  | 1.072 | 1.373 | 1.885 | 1.761 | 3.176  | 22.20  | -103.75 | None | #  |
| 7062006 | Ch25h      | Cholesterol 25-hydroxylase                                                          | 163  | 0.490 | 0.476 | 6.261 | 5.967 | 1.552  | -4.10  | 79.55   | None | #  |
| 7231595 | Chac1      | ChaC, cation transport regulator homolog 1 (E. coli)                                | 450  | 1.089 | 1.668 | 2.106 | 2.194 | 3.815  | 0.02   | -94.24  | None | #  |
| 7044959 | Ctgf       | Connective tissue growth factor                                                     | 2178 | 0.614 | 0.682 | 2.556 | 2.252 | 1.474  | -5.30  | 49.10   | None | #  |
| 7215359 | Cyr61      | Cysteine-rich, angiogenic inducer, 61                                               | 2677 | 0.606 | 1.544 | 3.667 | 3.512 | 4.367  | -8.97  | -5.85   | None | #  |
| 7066011 | Dusp1      | Dual specificity phosphatase 1                                                      | 1479 | 0.694 | 0.840 | 2.686 | 2.151 | 2.976  | 13.62  | -26.70  | None | *  |
| 7169197 | Egr1       | Early growth response 1                                                             | 3468 | 0.077 | 3.172 | 2.984 | 0.164 | 3.929  | 95.61  | 61.83   | None | *  |
| 7202562 | F2rl1      | Coagulation factor II (thrombin) receptor-like 1                                    | 226  | 0.965 | 0.783 | 1.567 | 1.452 | 0.854  | 14.02  | 87.44   | None | #  |
| 7024951 | Fbxo30     | F-box protein 30                                                                    | 305  | 0.941 | 0.792 | 1.508 | 1.349 | 1.066  | 19.67  | 45.86   | None | #  |
| 7162363 | Gadd45g    | Growth arrest and DNA-damage-inducible, gamma                                       | 946  | 1.038 | 1.480 | 2.381 | 1.885 | 3.891  | 38.62  | -74.63  | None | #  |
| 7137256 | Gch1       | GTP cyclohydrolase 1                                                                | 58   | 0.998 | 1.039 | 1.537 | 1.358 | 1.228  | 32.89  | 64.66   | None | #  |
| 7324926 | Glpr1      | GLI pathogenesis-related 1                                                          | 281  | 1.113 | 1.020 | 1.537 | 1.385 | 1.081  | 49.35  | 88.60   | None | #  |
| 7047218 | Has1       | Hyaluronan synthase 1                                                               | 76   | 1.482 | 0.811 | 2.461 | 2.637 | 1.452  | 20.88  | 56.09   | None | #  |
| 7166170 | Idi1       | Isopentenyl-diphosphate delta isomerase 1                                           | 623  | 1.070 | 1.102 | 1.663 | 1.239 | 1.791  | 74.47  | -4.04   | None | #  |
| 7179800 | Ier2       | Immediate early response 2                                                          | 204  | 0.592 | 4.463 | 2.451 | 0.900 | 12.749 | 78.75  | -471.11 | None | ** |
| 7353831 | Il1rl2     | Interleukin 1 receptor-like 2                                                       | 107  | 0.926 | 0.950 | 1.584 | 1.422 | 1.028  | 15.06  | 86.63   | None | #  |
| 7229388 | Itgav      | Integrin, alpha V                                                                   | 124  | 1.156 | 0.971 | 1.749 | 1.477 | 1.125  | 57.16  | 79.40   | None | #  |

|         |           |                                                                                   |      |       |        |        |        |        |         |         |      |    |
|---------|-----------|-----------------------------------------------------------------------------------|------|-------|--------|--------|--------|--------|---------|---------|------|----|
| 7288744 | Jun       | Jun proto-oncogene                                                                | 440  | 1.116 | 3.392  | 2.349  | 3.374  | 8.345  | -67.37  | -267.23 | None | ** |
| 7149521 | Klf2      | Kruppel-like factor 2 (lung)                                                      | 173  | 1.371 | 4.566  | 2.083  | 3.537  | 5.917  | -100.13 | -24.85  | None | ** |
| 7166280 | Klf6      | Kruppel-like factor 6                                                             | 755  | 0.616 | 1.314  | 3.005  | 2.246  | 3.038  | 18.70   | 14.00   | None | *  |
| 7187867 | Lysmd3    | LysM, putative peptidoglycan-binding, domain containing 3                         | 251  | 1.177 | 0.910  | 1.559  | 1.369  | 0.954  | 65.59   | 92.03   | None | #  |
| 7266023 | Mat2a     | Methionine adenosyltransferase II, alpha                                          | 2389 | 1.113 | 0.844  | 1.589  | 1.363  | 1.501  | 57.72   | -11.46  | None | #  |
| 7383823 | Morc4     | MORC family CW-type zinc finger 4                                                 | 215  | 1.121 | 0.902  | 1.661  | 1.432  | 0.992  | 53.00   | 86.31   | None | #  |
| 7155813 | Nfil3     | Nuclear factor, interleukin 3 regulated                                           | 114  | 1.278 | 1.160  | 2.798  | 2.767  | 1.937  | 17.22   | 56.81   | None | #  |
| 7059690 | Npas4     | Neuronal PAS domain protein 4                                                     | 65   | 0.936 | 0.920  | 2.020  | 2.453  | 0.964  | -48.75  | 95.69   | None | #  |
| 7320920 | Nr4a1     | Nuclear receptor subfamily 4, group A, member 1                                   | 234  | 1.150 | 12.279 | 18.433 | 13.496 | 34.449 | 29.18   | -27.17  | None | ** |
| 7365259 | Per2      | Period homolog 2 (Drosophila)                                                     | 199  | 0.927 | 0.824  | 1.836  | 1.671  | 0.857  | 11.05   | 96.04   | None | #  |
| 7290290 | Plk3      | Polo-like kinase 3 (Drosophila)                                                   | 244  | 0.492 | 1.145  | 1.533  | 1.156  | 2.275  | -24.53  | -111.80 | None | ** |
| 7197221 | Prkab2    | Protein kinase, AMP-activated, beta 2 non-catalytic subunit                       | 147  | 1.113 | 1.308  | 1.755  | 1.721  | 1.427  | 19.49   | 84.26   | None | #  |
| 7124933 | Ras11b    | RAS-like family 11 member B                                                       | 1201 | 0.983 | 0.895  | 1.850  | 2.106  | 1.341  | -32.10  | 47.49   | None | #  |
| 7304448 | Rhob      | Ras homolog gene family, member B                                                 | 575  | 1.280 | 5.709  | 2.561  | 4.382  | 9.829  | -98.69  | -163.91 | None | ** |
| 7101220 | Serpine1  | Serine (or cysteine) peptidase inhibitor, clade E, member 1                       | 944  | 0.719 | 1.582  | 7.690  | 5.122  | 6.892  | 34.17   | 20.62   | None | #  |
| 7237652 | Slc25a25  | Solute carrier family 25 (mitochondrial carrier, phosphate carrier), member 25    | 140  | 0.929 | 0.972  | 1.752  | 2.005  | 1.653  | -43.20  | 9.38    | None | *  |
| 7351949 | Srf       | Serum response factor (c-fos serum response element-binding transcription factor) | 1479 | 0.958 | 1.023  | 1.644  | 1.553  | 1.459  | 7.64    | 32.34   | None | #  |
| 7133039 | Stc1      | Stanniocalcin 1                                                                   | 1359 | 1.048 | 0.606  | 1.581  | 1.606  | 0.821  | 4.02    | 63.06   | None | #  |
| 7345054 | Tagln     | Transgelin                                                                        | 2599 | 1.118 | 1.053  | 1.602  | 1.487  | 1.248  | 38.59   | 67.64   | None | #  |
| 7327525 | Tnfrsf11b | Tumor necrosis factor receptor superfamily, member 11b                            | 1719 | 0.936 | 0.830  | 1.802  | 1.700  | 0.873  | 4.76    | 94.63   | None | #  |
| 7184926 | Tppp3     | Tubulin polymerization-promoting protein family member 3                          | 257  | 1.148 | 0.906  | 1.561  | 2.021  | 0.939  | -55.55  | 94.03   | None | #  |
| 7200422 | Unknown   | Unknown                                                                           | 128  | 1.052 | 1.204  | 2.236  | 2.023  | 1.776  | 21.42   | 53.75   | None | #  |
| 7205580 | Unknown   | Unknown                                                                           | 254  | 1.014 | 0.599  | 1.701  | 1.686  | 0.942  | 4.17    | 50.97   | None | #  |
| 7335234 | Vof16     | Ischemia related factor vof-16                                                    | 672  | 0.688 | 0.427  | 2.880  | 1.106  | 0.540  | 77.81   | 93.98   | None | #  |

## Supplemental Table S4 Changes in transcript expression induced by PE at 2, 4 and 24 h

RNA expression analysis was performed using Affymetrix rat expression 230 2.0 microarrays and GeneSpring 12.0. The raw data for controls are given and results at each time are the mean fold change relative to the controls (n=3). K-means clustering was performed to identify upregulated (U0-U7) and downregulated (D0-D3) groups. Statistical analysis was performed by one-way ANOVA with SNK post-test using a Benjamini and Hochberg false discovery rate correction (FDR<0.05) \* 2 h vs control; # 4 h vs control; † 24 h v control

| Probeset ID  | Gene Symbol | Gene Title                                                                                   | Raw data (Control) | 2 h   | 4 h   | 24 h  | Statistical significance | Cluster |
|--------------|-------------|----------------------------------------------------------------------------------------------|--------------------|-------|-------|-------|--------------------------|---------|
| 1369027_at   | A4galt      | Alpha 1,4-galactosyltransferase                                                              | 144                | 1.143 | 1.603 | 1.249 | #                        | U6      |
| 1390783_at   | Abca8a      | ATP-binding cassette, sub-family A (ABC1), member 8a                                         | 173                | 1.133 | 1.012 | 0.654 | †                        | D0      |
| 1390455_at   | Abhd2       | Abhydrolase domain containing 2                                                              | 180                | 1.981 | 2.211 | 1.888 | *#†                      | U0      |
| 1387101_at   | Acsl4       | Acyl-CoA synthetase long-chain family member 4                                               | 607                | 1.550 | 1.343 | 1.446 | ---                      | U4      |
| 1389189_at   | Actn1       | Actinin, alpha 1                                                                             | 1561               | 1.268 | 1.565 | 1.639 | ---                      | U0      |
| 1393730_at   | Adamts4     | ADAM metalloproteinase with thrombospondin type 1 motif, 4                                   | 185                | 1.653 | 1.080 | 0.880 | *                        | U3      |
| 1394483_at   | Adamts5     | A disintegrin-like and metalloprotease (reprolysin type) with thrombospondin type 1 motif, 5 | 269                | 0.726 | 0.572 | 0.938 | ---                      | D2      |
| 1376481_at   | Adamts9     | A disintegrin-like and metalloprotease (reprolysin type) with thrombospondin type 1 motif, 9 | 176                | 2.010 | 1.898 | 1.148 | *#                       | U1      |
| 1374677_at   | Adss1       | Adenylosuccinate synthase like 1                                                             | 409                | 1.189 | 1.103 | 0.611 | †                        | D0      |
| 1384022_at   | Agfg1       | ArfGAP with FG repeats 1                                                                     | 558                | 1.181 | 1.565 | 1.324 | *#†                      | U6      |
| 1395414_at   | Agl         | Amylo-1,6-glucosidase, 4-alpha-glucanotransferase                                            | 100                | 0.983 | 0.603 | 0.712 | #                        | D3      |
| 1372276_at   | Agpat3      | 1-acylglycerol-3-phosphate O-acyltransferase 3                                               | 86                 | 1.442 | 2.398 | 0.981 | *#                       | U2      |
| 1382041_at   | Agpat3      | 1-acylglycerol-3-phosphate O-acyltransferase 3                                               | 401                | 1.280 | 1.713 | 1.129 | #                        | U6      |
| 1382227_at   | Agpat3      | 1-acylglycerol-3-phosphate O-acyltransferase 3                                               | 173                | 1.413 | 2.262 | 1.099 | *#                       | U6      |
| 1369291_at   | Agtr1a      | Angiotensin II receptor, type 1a                                                             | 84                 | 0.926 | 0.646 | 0.820 | #                        | D3      |
| 1369146_a_at | Ahr         | Aryl hydrocarbon receptor                                                                    | 78                 | 1.018 | 0.992 | 1.506 | †                        | U5      |
| 1371824_at   | Ak3l1       | Adenylate kinase 3-like 1                                                                    | 84                 | 1.452 | 1.936 | 1.345 | #                        | U6      |
| 1388070_a_at | Akap1       | A kinase (PRKA) anchor protein 1                                                             | 288                | 0.774 | 0.629 | 0.828 | #                        | D3      |
| 1386764_at   | Akap2       | A kinase (PRKA) anchor protein 2                                                             | 109                | 2.000 | 1.581 | 1.175 | *                        | U1      |
| 1386998_at   | Aldoc       | Aldolase C, fructose-bisphosphate                                                            | 663                | 1.025 | 0.992 | 0.604 | †                        | D0      |
| 1368342_at   | Ampd3       | Adenosine monophosphate deaminase 3                                                          | 237                | 0.869 | 0.608 | 0.533 | #†                       | D1      |
| 1388924_at   | Angptl4     | Angiopietin-like 4                                                                           | 165                | 1.900 | 1.168 | 1.028 | *                        | U3      |
| 1389398_at   | Ank1        | Ankyrin 1, erythrocytic                                                                      | 223                | 1.013 | 0.800 | 0.638 | #†                       | D1      |
| 1373250_at   | Anln        | Anillin, actin binding protein                                                               | 231                | 1.075 | 1.153 | 1.506 | †                        | U5      |
| 1367974_at   | Anxa3       | Annexin A3                                                                                   | 100                | 1.149 | 1.511 | 1.053 | #                        | U6      |
| 1387376_at   | Aox1        | Aldehyde oxidase 1                                                                           | 225                | 1.151 | 0.879 | 0.556 | †                        | D0      |
| 1398616_at   | Ap1s2       | Adaptor-related protein complex 1, sigma 2 subunit                                           | 633                | 1.151 | 1.071 | 0.603 | †                        | D0      |
| 1377750_at   | Arhgef3     | Rho guanine nucleotide exchange factor (GEF) 3                                               | 136                | 2.198 | 1.820 | 1.344 | *#†                      | U4      |
| 1379311_at   | Arid5a      | AT rich interactive domain 5A (Mrf1 like)                                                    | 95                 | 1.858 | 1.322 | 1.001 | *                        | U3      |
| 1397437_at   | Arid5a      | AT rich interactive domain 5A (Mrf1 like)                                                    | 53                 | 1.721 | 1.315 | 1.086 | *                        | U3      |
| 1369268_at   | Atf3        | Activating transcription factor 3                                                            | 50                 | 2.747 | 1.537 | 1.221 | *                        | U3      |
| 1373287_at   | Atoh8       | Atonal homolog 8 (Drosophila)                                                                | 294                | 0.646 | 0.940 | 0.962 | *                        | D2      |
| 1385361_at   | Atp10a      | ATPase, class V, type 10A                                                                    | 48                 | 1.589 | 1.170 | 1.282 | *#†                      | U3      |
| 1368701_at   | Atp1a3      | ATPase, Na <sup>+</sup> /K <sup>+</sup> transporting, alpha 3 polypeptide                    | 219                | 0.986 | 0.889 | 0.606 | †                        | D0      |
| 1379906_at   | Atp1b2      | ATPase, Na <sup>+</sup> /K <sup>+</sup> transporting, beta 2 polypeptide                     | 376                | 1.010 | 0.878 | 0.632 | †                        | D0      |



|              |                          |                                                                  |      |       |       |       |     |    |
|--------------|--------------------------|------------------------------------------------------------------|------|-------|-------|-------|-----|----|
| 1370050_at   | Atp2b1                   | ATPase, Ca++ transporting, plasma membrane 1                     | 407  | 1.826 | 1.560 | 1.105 | *#  | U1 |
| 1386426_at   | Atp2b1                   | ATPase, Ca++ transporting, plasma membrane 1                     | 431  | 1.963 | 1.624 | 1.207 | *   | U1 |
| 1381382_at   | Atp6ap1l                 | ATPase, H+ transporting, lysosomal accessory protein 1-like      | 227  | 1.011 | 0.907 | 0.626 | †   | D0 |
| 1378134_at   | Atp8b1                   | ATPase, Class I, type 8B, member 1                               | 75   | 2.389 | 1.328 | 1.191 | *   | U3 |
| 1391693_at   | Atp8b1                   | ATPase, Class I, type 8B, member 1                               | 73   | 2.479 | 1.190 | 0.955 | *   | U3 |
| 1370252_at   | Avpi1                    | arginine vasopressin-induced 1                                   | 1017 | 1.146 | 1.345 | 1.518 | --- | U0 |
| 1389402_at   | Axud1                    | AXIN1 up-regulated 1                                             | 145  | 2.414 | 1.732 | 1.321 | *#  | U1 |
| 1387206_at   | B4galt6                  | UDP-Gal:betaGlcNAc beta 1,4-galactosyltransferase, polypeptide 6 | 452  | 1.148 | 1.512 | 1.346 | #   | U0 |
| 1387938_at   | Baalc                    | Brain and acute leukemia, cytoplasmic                            | 49   | 1.458 | 1.982 | 0.962 | *#  | U2 |
| 1389047_at   | Bag2                     | Bcl2-associated athanogene 2                                     | 386  | 1.428 | 1.656 | 1.366 | #   | U6 |
| 1374113_at   | Baz1a                    | Bromodomain adjacent to zinc finger domain, 1A                   | 163  | 1.741 | 1.533 | 1.176 | *#  | U1 |
| 1370869_at   | Bcat1                    | Branched chain aminotransferase 1, cytosolic                     | 856  | 1.434 | 1.529 | 1.657 | †   | U0 |
| 1373494_at   | Bcr                      | Breakpoint cluster region                                        | 384  | 2.329 | 2.232 | 1.314 | *#  | U4 |
| 1372613_at   | Bdh2                     | 3-hydroxybutyrate dehydrogenase, type 2                          | 333  | 1.047 | 0.981 | 0.630 | †   | D0 |
| 1370649_at   | Bdkrb2 ///<br>RGD1308470 | Bradykinin receptor B2 /// similar to RIKEN cDNA 4933433P14 gene | 106  | 1.670 | 1.793 | 1.218 | *#† | U2 |
| 1370650_s_at | Bdkrb2 ///<br>RGD1308470 | Bradykinin receptor B2 /// similar to RIKEN cDNA 4933433P14 gene | 60   | 2.440 | 2.793 | 1.545 | *#  | U4 |
| 1371120_s_at | Bdkrb2 ///<br>RGD1308470 | Bradykinin receptor B2 /// similar to RIKEN cDNA 4933433P14 gene | 44   | 1.751 | 1.575 | 1.215 | *#  | U4 |
| 1398270_at   | Bmp2                     | Bone morphogenetic protein 2                                     | 106  | 2.134 | 2.264 | 1.586 | *#† | U4 |
| 1389403_at   | Bmp7                     | Bone morphogenetic protein 7                                     | 182  | 1.348 | 1.654 | 1.689 | #†  | U0 |
| 1386994_at   | Btg2                     | B-cell translocation gene 2, anti-proliferative                  | 361  | 1.865 | 1.845 | 1.281 | *#  | U4 |
| 1386995_at   | Btg2                     | B-cell translocation gene 2, anti-proliferative                  | 252  | 2.606 | 1.977 | 1.239 | *#  | U1 |
| 1374654_at   | Btrc                     | Beta-transducin repeat containing                                | 254  | 1.621 | 1.260 | 0.985 | *   | U1 |
| 1389569_at   | Bxdc2                    | Brix domain containing 2                                         | 350  | 1.529 | 1.528 | 1.235 | --- | U4 |
| 1395479_at   | Bxdc2                    | Brix domain containing 2                                         | 159  | 1.194 | 1.570 | 1.224 | #   | U6 |
| 1372293_at   | C2cd4d                   | C2 calcium-dependent domain containing 4D                        | 3633 | 1.069 | 1.185 | 1.836 | †   | U5 |
| 1372536_at   | Cabc1                    | Chaperone, ABC1 activity of bc1 complex homolog (S. pombe)       | 286  | 0.922 | 0.783 | 0.590 | †   | D1 |
| 1370178_at   | Cacnb2                   | Calcium channel, voltage-dependent, beta 2 subunit               | 378  | 1.581 | 1.295 | 1.183 | *   | U3 |
| 1391030_at   | Camta1                   | Calmodulin-binding transcription activator 1                     | 443  | 1.532 | 2.269 | 1.683 | #   | U6 |
| 1397536_at   | Camta1                   | Calmodulin-binding transcription activator 1                     | 234  | 1.369 | 1.948 | 1.586 | *#† | U6 |
| 1368131_at   | Capn6                    | Calpain 6                                                        | 282  | 1.172 | 1.115 | 0.661 | †   | D0 |
| 1371027_at   | Cblb                     | Cas-Br-M (murine) ecotropic retroviral transforming sequence b   | 356  | 1.635 | 1.283 | 1.059 | *   | U1 |
| 1368037_at   | Cbr1                     | Carbonyl reductase 1                                             | 571  | 1.502 | 1.545 | 1.011 | *#  | U2 |
| 1373085_at   | Cbr3                     | Carbonyl reductase 3                                             | 126  | 2.302 | 1.492 | 1.119 | *#  | U3 |
| 1390101_at   | Ccdc107                  | Coiled-coil domain containing 107                                | 343  | 1.194 | 1.155 | 1.602 | †   | U5 |
| 1376104_at   | Ccdc165                  | Coiled-coil domain containing 165                                | 80   | 1.748 | 1.613 | 1.185 | *#  | U1 |
| 1376850_a_at | Ccl27                    | Chemokine (C-C motif) ligand 27                                  | 95   | 1.092 | 1.225 | 1.830 | †   | U5 |
| 1384268_at   | Ccnyl1                   | Cyclin Y-like 1                                                  | 216  | 1.323 | 1.659 | 1.305 | #   | U6 |
| 1377869_at   | Ccrn4l                   | CCR4 carbon catabolite repression 4-like (S. cerevisiae)         | 137  | 4.884 | 2.921 | 1.297 | *#  | U1 |
| 1369953_a_at | Cd24                     | CD24 molecule                                                    | 190  | 1.913 | 1.630 | 1.273 | *#† | U4 |
| 1367689_a_at | Cd36                     | CD36 molecule (thrombospondin receptor)                          | 1102 | 1.096 | 0.816 | 0.607 | †   | D1 |
| 1386901_at   | Cd36                     | CD36 molecule (thrombospondin receptor)                          | 1798 | 0.992 | 0.962 | 0.651 | †   | D0 |
| 1376866_at   | Cd3eap                   | CD3E antigen, epsilon polypeptide-associated protein             | 91   | 1.349 | 1.608 | 1.306 | #   | U6 |
| 1368921_a_at | Cd44                     | Cd44 molecule                                                    | 400  | 1.501 | 1.787 | 1.257 | *#† | U6 |
| 1387952_a_at | Cd44                     | Cd44 molecule                                                    | 437  | 1.667 | 1.704 | 1.328 | *#  | U4 |
| 1375910_at   | Cdc42ep3                 | CDC42 effector protein (Rho GTPase binding) 3                    | 885  | 1.503 | 1.687 | 1.202 | *#  | U2 |
| 1374139_at   | Cdr2                     | Cerebellar degeneration-related 2                                | 237  | 1.371 | 1.554 | 1.468 | --- | U0 |
| 1380063_at   | Ch25h                    | Cholesterol 25-hydroxylase                                       | 84   | 2.394 | 2.732 | 1.121 | *#  | U2 |
| 1379300_at   | Chst2                    | Carbohydrate sulfotransferase 2                                  | 102  | 1.536 | 1.622 | 1.206 | *#  | U2 |
| 1386615_at   | Chst2                    | Carbohydrate sulfotransferase 2                                  | 182  | 1.598 | 1.733 | 1.131 | *#  | U2 |

|              |         |                                                                                        |      |       |       |       |     |    |
|--------------|---------|----------------------------------------------------------------------------------------|------|-------|-------|-------|-----|----|
| 1367601_at   | Cited2  | Cbp/p300-interacting transactivator, with Glu/Asp-rich carboxy-terminal domain, 2      | 343  | 2.499 | 2.471 | 1.155 | *#  | U2 |
| 1367602_at   | Cited2  | Cbp/p300-interacting transactivator, with Glu/Asp-rich carboxy-terminal domain, 2      | 453  | 2.627 | 2.024 | 1.172 | *#  | U1 |
| 1370225_at   | Cited4  | Cbp/p300-interacting transactivator, with Glu/Asp-rich carboxy-terminal domain, 4      | 361  | 0.508 | 0.600 | 0.745 | *#† | D2 |
| 1367626_at   | Ckm     | Creatine kinase, muscle                                                                | 1760 | 1.068 | 1.019 | 0.641 | †   | D0 |
| 1373182_at   | Cldn12  | Claudin 12                                                                             | 229  | 1.504 | 1.220 | 1.059 | *#  | U3 |
| 1370254_at   | Clic5   | Chloride intracellular channel 5                                                       | 155  | 1.117 | 1.635 | 0.971 | #   | U6 |
| 1383219_at   | Clip4   | CAP-GLY domain containing linker protein family, member 4                              | 338  | 0.913 | 0.815 | 0.620 | #†  | D1 |
| 1393619_at   | Cnot6l  | CCR4-NOT transcription complex, subunit 6-like                                         | 70   | 1.594 | 1.065 | 1.046 | *   | U3 |
| 1370927_at   | Col12a1 | Collagen, type XII, alpha 1                                                            | 253  | 1.215 | 1.345 | 1.960 | *#† | U5 |
| 1395580_at   | Col12a1 | Collagen, type XII, alpha 1                                                            | 104  | 1.098 | 0.940 | 1.619 | †   | U5 |
| 1376955_at   | Col4a4  | Procollagen, type IV, alpha 4                                                          | 72   | 1.165 | 0.933 | 1.528 | †   | U5 |
| 1393891_at   | Col8a1  | Collagen, type VIII, alpha 1                                                           | 174  | 1.060 | 1.151 | 1.569 | †   | U5 |
| 1373866_at   | Coq10b  | Coenzyme Q10 homolog B (S. cerevisiae)                                                 | 297  | 2.239 | 1.864 | 1.434 | *#† | U4 |
| 1372223_at   | Cpeb4   | Cytoplasmic polyadenylation element binding protein 4                                  | 459  | 2.220 | 1.436 | 1.328 | *   | U3 |
| 1393294_at   | Cpeb4   | Cytoplasmic polyadenylation element binding protein 4                                  | 285  | 1.622 | 1.179 | 1.067 | *   | U3 |
| 1367742_at   | Cpt1b   | Carnitine palmitoyltransferase 1b, muscle                                              | 907  | 1.074 | 0.899 | 0.596 | †   | D0 |
| 1390420_at   | Cpxm1   | Carboxypeptidase X (M14 family), member 1                                              | 970  | 1.203 | 0.961 | 0.624 | †   | D0 |
| 1369737_at   | Crem    | cAMP responsive element modulator                                                      | 35   | 4.165 | 1.868 | 1.029 | *#  | U3 |
| 1369738_s_at | Crem    | cAMP responsive element modulator                                                      | 176  | 2.433 | 1.657 | 1.080 | *#  | U1 |
| 1378925_at   | Crem    | cAMP responsive element modulator                                                      | 116  | 5.232 | 1.965 | 1.080 | *#  | U3 |
| 1393550_at   | Crem    | cAMP responsive element modulator                                                      | 38   | 3.093 | 1.117 | 1.020 | *   | U3 |
| 1376799_a_at | Crlf1   | Cytokine receptor-like factor 1                                                        | 200  | 1.172 | 1.475 | 2.435 | *#† | U5 |
| 1395512_at   | Crlf1   | Cytokine receptor-like factor 1                                                        | 130  | 1.001 | 1.216 | 2.388 | †   | U5 |
| 1392640_at   | Cry1    | Cryptochrome 1 (photolyase-like)                                                       | 114  | 1.476 | 1.582 | 0.994 | *#  | U2 |
| 1368685_at   | Cspg4   | Chondroitin sulfate proteoglycan 4                                                     | 229  | 1.490 | 1.770 | 1.541 | #   | U0 |
| 1370057_at   | Csrp1   | Cysteine and glycine-rich protein 1                                                    | 2358 | 1.055 | 1.141 | 1.502 | †   | U5 |
| 1391635_at   | Ctdspl  | CTD (carboxy-terminal domain, RNA polymerase II, polypeptide A) small phosphatase-like | 137  | 1.201 | 1.546 | 1.133 | #   | U6 |
| 1398354_at   | Ctnnal1 | Catenin (cadherin associated protein), alpha-like 1                                    | 87   | 1.480 | 1.609 | 0.792 | *#  | U2 |
| 1379365_at   | Cxcl11  | Chemokine (C-X-C motif) ligand 11                                                      | 408  | 1.111 | 0.941 | 0.317 | †   | D0 |
| 1387655_at   | Cxcl12  | Chemokine (C-X-C motif) ligand 12 (stromal cell-derived factor 1)                      | 412  | 0.937 | 0.583 | 0.693 | #   | D3 |
| 1398383_at   | Cyb561  | Cytochrome b-561                                                                       | 253  | 1.120 | 1.047 | 0.644 | †   | D0 |
| 1376788_at   | Dapk1   | Death associated protein kinase 1                                                      | 818  | 0.964 | 0.977 | 0.612 | †   | D0 |
| 1379911_at   | Dapk1   | Death associated protein kinase 1                                                      | 407  | 0.974 | 0.988 | 0.655 | †   | D0 |
| 1387111_at   | Ddah1   | Dimethylarginine dimethylaminohydrolase 1                                              | 755  | 1.041 | 1.143 | 1.885 | †   | U5 |
| 1389079_at   | Dhrs7c  | Dehydrogenase/reductase (SDR family) member 7C                                         | 93   | 1.040 | 0.845 | 0.509 | †   | D0 |
| 1370328_at   | Dkk3    | Dickkopf homolog 3 (Xenopus laevis)                                                    | 1498 | 0.971 | 0.859 | 0.635 | †   | D1 |
| 1374651_at   | Dopey2  | Dopey family member 2                                                                  | 139  | 1.575 | 1.761 | 1.016 | *#  | U2 |
| 1389155_at   | Dos     | Downstream of Stk11                                                                    | 183  | 2.409 | 1.667 | 1.304 | *#  | U1 |
| 1388589_at   | Dot1l   | DOT1-like, histone H3 methyltransferase (S. cerevisiae)                                | 266  | 1.937 | 2.053 | 1.022 | --- | U2 |
| 1368146_at   | Dusp1   | Dual specificity phosphatase 1                                                         | 240  | 1.510 | 1.906 | 1.102 | *#  | U2 |
| 1368147_at   | Dusp1   | Dual specificity phosphatase 1                                                         | 57   | 1.347 | 1.569 | 1.091 | #   | U2 |
| 1373324_at   | Dusp14  | Dual specificity phosphatase 14                                                        | 121  | 1.570 | 1.478 | 1.240 | *#† | U4 |
| 1377023_at   | Dusp2   | Dual specificity phosphatase 2                                                         | 100  | 1.983 | 1.441 | 1.293 | *#† | U3 |
| 1368124_at   | Dusp5   | Dual specificity phosphatase 5                                                         | 212  | 2.956 | 1.843 | 1.007 | *#  | U1 |
| 1377064_at   | Dusp6   | Dual specificity phosphatase 6                                                         | 339  | 1.237 | 1.929 | 1.500 | #†  | U6 |
| 1387146_a_at | Ednrb   | Endothelin receptor type B                                                             | 85   | 1.359 | 1.815 | 1.035 | #   | U2 |
| 1390112_at   | Efemp1  | EGF-containing fibulin-like extracellular matrix protein 1                             | 288  | 1.080 | 0.999 | 0.437 | †   | D0 |
| 1372844_at   | Efna1   | Ephrin A1                                                                              | 105  | 1.542 | 1.091 | 0.978 | *   | U3 |

|              |                        |                                                                                                             |      |       |       |       |     |    |
|--------------|------------------------|-------------------------------------------------------------------------------------------------------------|------|-------|-------|-------|-----|----|
| 1387306_a_at | Egr2                   | Early growth response 2                                                                                     | 113  | 1.721 | 2.354 | 1.393 | #   | U6 |
| 1368867_at   | Eif2c2                 | Eukaryotic translation initiation factor 2C, 2                                                              | 204  | 1.750 | 1.649 | 1.125 | *#  | U1 |
| 1389680_at   | EIi2                   | Elongation factor RNA polymerase II 2                                                                       | 122  | 2.142 | 1.434 | 1.172 | *#  | U3 |
| 1386907_at   | Eno3                   | Enolase 3, beta, muscle                                                                                     | 133  | 1.065 | 1.227 | 2.106 | †   | U5 |
| 1370047_at   | Enpp1                  | Ectonucleotide pyrophosphatase/phosphodiesterase 1                                                          | 465  | 1.211 | 1.123 | 1.851 | †   | U5 |
| 1374143_at   | Epha2                  | Eph receptor A2                                                                                             | 128  | 2.512 | 2.066 | 1.376 | *#  | U4 |
| 1373093_at   | Errfi1                 | ERBB receptor feedback inhibitor 1                                                                          | 603  | 1.735 | 1.535 | 1.079 | *#  | U1 |
| 1371710_at   | Etnk1                  | Ethanolamine kinase 1                                                                                       | 533  | 2.003 | 1.595 | 1.210 | **† | U1 |
| 1393151_at   | Etnk1                  | Ethanolamine kinase 1                                                                                       | 224  | 2.034 | 1.475 | 1.162 | *   | U1 |
| 1388342_at   | Etv3                   | Ets variant 3                                                                                               | 206  | 1.739 | 1.419 | 1.109 | *#  | U1 |
| 1367899_at   | F2r                    | Coagulation factor II (thrombin) receptor                                                                   | 846  | 1.179 | 1.385 | 1.543 | #†  | U0 |
| 1369182_at   | F3                     | Coagulation factor III (thromboplastin, tissue factor)                                                      | 106  | 1.593 | 1.400 | 1.220 | *   | U4 |
| 1392510_at   | Fam180a                | Family with sequence similarity 180, member A                                                               | 363  | 0.633 | 0.600 | 0.825 | *#  | D2 |
| 1391944_at   | Fam184a /// RGD1560557 | Family with sequence similarity 184, member A /// similar to minichromosome maintenance protein 8 isoform 1 | 63   | 1.253 | 1.819 | 1.114 | *#  | U6 |
| 1389533_at   | Fbln2                  | Fibulin 2                                                                                                   | 964  | 1.103 | 1.239 | 1.749 | †   | U5 |
| 1368336_at   | Fdx1                   | Ferredoxin 1                                                                                                | 857  | 2.643 | 3.028 | 1.108 | *#  | U2 |
| 1387301_at   | Fgf1                   | Fibroblast growth factor 1                                                                                  | 172  | 0.910 | 0.539 | 0.798 | #   | D3 |
| 1368114_at   | Fgf13                  | Fibroblast growth factor 13                                                                                 | 391  | 1.026 | 0.767 | 0.627 | #†  | D1 |
| 1383516_at   | Fgl2                   | Fibrinogen-like 2                                                                                           | 87   | 1.948 | 1.192 | 1.067 | *   | U3 |
| 1386637_at   | Fgl2                   | Fibrinogen-like 2                                                                                           | 197  | 1.566 | 1.062 | 0.986 | *   | U3 |
| 1392894_at   | Fgl2                   | Fibrinogen-like 2                                                                                           | 506  | 1.779 | 1.497 | 1.162 | *   | U1 |
| 1376937_at   | Filipl                 | Filamin A interacting protein 1-like                                                                        | 223  | 1.323 | 1.654 | 1.382 | #   | U6 |
| 1389449_at   | Fit1                   | Fat-inducing transcript 1                                                                                   | 197  | 0.877 | 0.865 | 0.558 | †   | D0 |
| 1375043_at   | Fos                    | FBJ osteosarcoma oncogene                                                                                   | 51   | 1.616 | 2.370 | 1.243 | *#  | U6 |
| 1368489_at   | Fosl1                  | Fos-like antigen 1                                                                                          | 76   | 2.018 | 1.757 | 1.328 | **† | U4 |
| 1383860_at   | Fosl2                  | Fos-like antigen 2                                                                                          | 77   | 1.759 | 1.195 | 1.126 | *   | U3 |
| 1387843_at   | Fst                    | Follistatin                                                                                                 | 82   | 1.403 | 1.506 | 1.540 | **† | U0 |
| 1379440_at   | Fstl3                  | Follistatin-like 3 (secreted glycoprotein)                                                                  | 170  | 0.993 | 1.353 | 1.604 | #†  | U5 |
| 1368207_at   | Fxyd5                  | FXYD domain-containing ion transport regulator 5                                                            | 499  | 1.094 | 1.181 | 1.545 | #†  | U5 |
| 1392818_at   | Gas5                   | Growth arrest specific 5                                                                                    | 248  | 1.307 | 1.550 | 1.150 | *#  | U6 |
| 1374125_at   | Gata5                  | GATA binding protein 5                                                                                      | 134  | 0.529 | 0.656 | 0.851 | *   | D2 |
| 1387221_at   | Gch1                   | GTP cyclohydrolase 1                                                                                        | 55   | 1.585 | 1.739 | 1.232 | *#  | U2 |
| 1370688_at   | Gclc                   | Glutamate-cysteine ligase, catalytic subunit                                                                | 265  | 1.968 | 1.122 | 1.159 | *   | U3 |
| 1372523_at   | Gclc                   | Glutamate-cysteine ligase, catalytic subunit                                                                | 267  | 2.166 | 1.281 | 1.142 | *#  | U3 |
| 1387659_at   | Gda                    | Guanine deaminase                                                                                           | 1156 | 1.823 | 1.971 | 1.026 | *#  | U2 |
| 1382351_at   | Gem                    | GTP binding protein (gene overexpressed in skeletal muscle)                                                 | 82   | 2.167 | 1.560 | 0.910 | *   | U1 |
| 1377761_at   | Gfpt2                  | Glutamine-fructose-6-phosphate transaminase 2                                                               | 1455 | 2.367 | 1.874 | 1.303 | **† | U1 |
| 1367852_s_at | Gp1bb /// Sept5        | Glycoprotein Ib (platelet), beta polypeptide /// septin 5                                                   | 49   | 1.144 | 1.383 | 1.522 | #†  | U0 |
| 1369666_at   | Gpd2                   | Glycerol-3-phosphate dehydrogenase 2, mitochondrial                                                         | 116  | 1.512 | 1.096 | 1.124 | *   | U3 |
| 1387241_at   | Gpr88                  | G-protein coupled receptor 88                                                                               | 99   | 0.778 | 0.662 | 0.621 | **† | D1 |
| 1376828_at   | Gprc5a                 | G protein-coupled receptor, family C, group 5, member A                                                     | 112  | 1.809 | 2.341 | 1.777 | **† | U6 |
| 1378163_at   | Grem2                  | Gremlin 2, cysteine knot superfamily, homolog (Xenopus laevis)                                              | 110  | 1.192 | 1.137 | 0.662 | †   | D0 |
| 1389890_at   | Gse1                   | Genetic suppressor element 1                                                                                | 88   | 1.505 | 1.219 | 1.162 | *   | U3 |
| 1371942_at   | Gstt3                  | Glutathione S-transferase, theta 3                                                                          | 211  | 1.154 | 0.900 | 0.548 | †   | D0 |
| 1387396_at   | Hamp                   | Hepcidin antimicrobial peptide                                                                              | 720  | 1.186 | 1.254 | 0.510 | †   | D0 |
| 1371819_at   | Hdac5                  | Histone deacetylase 5                                                                                       | 406  | 1.690 | 1.581 | 1.000 | *#  | U1 |
| 1373381_at   | Herc4                  | Hect domain and RLD 4                                                                                       | 204  | 1.609 | 1.435 | 1.069 | *#  | U1 |
| 1391429_at   | Hfe2                   | Hemochromatosis type 2 (juvenile) (human homolog)                                                           | 129  | 1.037 | 0.793 | 0.562 | #†  | D1 |
| 1374105_at   | Higd1a                 | HIG1 domain family, member 1A                                                                               | 185  | 1.338 | 1.746 | 1.327 | #†  | U6 |
| 1376692_at   | Hipk2                  | Homeodomain interacting protein kinase 2                                                                    | 141  | 1.396 | 1.541 | 1.245 | --- | U6 |
| 1368546_at   | Hivep2                 | Human immunodeficiency virus type I enhancer binding protein 2                                              | 245  | 2.071 | 1.447 | 1.319 | *#  | U3 |

|              |              |                                                               |      |       |       |       |     |    |
|--------------|--------------|---------------------------------------------------------------|------|-------|-------|-------|-----|----|
| 1369006_at   | Hk2          | Hexokinase 2                                                  | 241  | 1.601 | 1.484 | 1.122 | *#  | U1 |
| 1383519_at   | Hk2          | Hexokinase 2                                                  | 582  | 1.447 | 1.538 | 0.984 | *#  | U2 |
| 1387233_at   | Hsd17b7      | Hydroxysteroid (17-beta) dehydrogenase 7                      | 159  | 1.318 | 1.259 | 1.558 | *#† | U0 |
| 1370912_at   | Hspa1b       | Heat shock 70kD protein 1B (mapped)                           | 129  | 1.299 | 1.565 | 1.400 | #   | U0 |
| 1369841_at   | Hspa2        | Heat shock protein 2                                          | 41   | 1.367 | 1.679 | 1.239 | #   | U6 |
| 1385620_at   | Hsph1        | Heat shock 105kDa/110kDa protein 1                            | 315  | 1.574 | 1.635 | 1.430 | *#† | U4 |
| 1387202_at   | Icam1        | Intercellular adhesion molecule 1                             | 763  | 1.514 | 1.347 | 0.968 | *#  | U1 |
| 1375120_at   | Id4          | Inhibitor of DNA binding 4                                    | 91   | 1.592 | 1.691 | 1.371 | --- | U4 |
| 1375183_at   | Id4          | Inhibitor of DNA binding 4                                    | 57   | 1.391 | 1.801 | 1.237 | --- | U6 |
| 1394022_at   | Id4          | Inhibitor of DNA binding 4                                    | 106  | 1.999 | 2.152 | 1.485 | *#† | U4 |
| 1368878_at   | Ildi1        | Isopentenyl-diphosphate delta isomerase 1                     | 1117 | 1.070 | 1.114 | 1.555 | †   | U5 |
| 1372389_at   | Ier2         | Immediate early response 2                                    | 283  | 1.780 | 1.612 | 1.350 | *#  | U4 |
| 1388587_at   | Ier3         | Immediate early response 3                                    | 821  | 1.631 | 1.769 | 1.444 | *#† | U4 |
| 1389355_at   | Ier5         | Immediate early response 5                                    | 509  | 1.360 | 1.626 | 1.107 | *#  | U2 |
| 1367795_at   | Ifrd1        | Interferon-related developmental regulator 1                  | 377  | 1.773 | 1.526 | 1.500 | *#† | U4 |
| 1370960_at   | Igfbp5       | Insulin-like growth factor binding protein 5                  | 700  | 1.003 | 0.893 | 0.444 | †   | D0 |
| 1387348_at   | Igfbp5       | Insulin-like growth factor binding protein 5                  | 421  | 0.954 | 0.685 | 0.477 | #†  | D1 |
| 1396152_s_at | Igfbp5       | Insulin-like growth factor binding protein 5                  | 315  | 1.163 | 0.677 | 0.479 | †   | D1 |
| 1387273_at   | Il1rl1       | Interleukin 1 receptor-like 1                                 | 229  | 2.003 | 2.135 | 2.150 | --- | U0 |
| 1387124_at   | Inha         | Inhibin alpha                                                 | 145  | 1.162 | 1.586 | 3.527 | #†  | U5 |
| 1377379_at   | Irf6         | Interferon regulatory factor 6                                | 56   | 1.327 | 1.569 | 1.135 | #   | U2 |
| 1371091_at   | Irs2         | Insulin receptor substrate 2                                  | 266  | 1.999 | 2.187 | 1.158 | *#  | U2 |
| 1392981_at   | Irx4         | Iroquois homeobox 4                                           | 521  | 0.549 | 0.575 | 0.690 | *#† | D2 |
| 1373049_at   | Itprip       | Inositol 1,4,5-trisphosphate receptor interacting protein     | 117  | 1.841 | 1.683 | 1.331 | *#  | U4 |
| 1373122_at   | Jub          | jJb, ajuba homolog (Xenopus laevis)                           | 375  | 1.152 | 1.556 | 1.234 | #   | U6 |
| 1390473_at   | Kcng2        | Potassium voltage-gated channel, subfamily G, member 2        | 453  | 0.843 | 0.644 | 0.818 | #   | D3 |
| 1370773_a_at | Kcnip2       | Kv channel-interacting protein 2                              | 130  | 1.203 | 0.757 | 0.409 | †   | D0 |
| 1373987_at   | Kcnip2       | Kv channel-interacting protein 2                              | 351  | 0.984 | 0.843 | 0.269 | †   | D0 |
| 1387698_at   | Kcnj11       | Potassium inwardly rectifying channel, subfamily J, member 11 | 147  | 0.600 | 0.622 | 0.783 | #   | D2 |
| 1391007_s_at | Kcnj11       | Potassium inwardly rectifying channel, subfamily J, member 11 | 186  | 0.571 | 0.623 | 0.710 | *#† | D2 |
| 1397764_at   | Kctd5        | Potassium channel tetramerisation domain containing 5         | 425  | 1.574 | 1.449 | 1.167 | *#  | U4 |
| 1368249_at   | Klf15        | Kruppel-like factor 15                                        | 314  | 0.752 | 0.729 | 0.662 | *#† | D1 |
| 1381396_s_at | Klf15        | Kruppel-like factor 15                                        | 215  | 0.705 | 0.624 | 0.634 | *#† | D3 |
| 1387260_at   | Klf4         | Kruppel-like factor 4 (gut)                                   | 513  | 1.813 | 1.304 | 1.211 | *#† | U3 |
| 1368363_at   | Klf5         | Kruppel-like factor 5                                         | 83   | 3.356 | 1.348 | 1.167 | *   | U3 |
| 1394039_at   | Klf5         | Kruppel-like factor 5                                         | 37   | 2.804 | 1.289 | 1.005 | *   | U3 |
| 1388155_at   | Krt18        | Keratin 18                                                    | 41   | 1.016 | 1.304 | 1.570 | †   | U5 |
| 1376632_at   | Lmcd1        | LIM and cysteine-rich domains 1                               | 236  | 4.051 | 4.595 | 1.342 | *#  | U2 |
| 1375726_at   | Lmo7         | LIM domain 7                                                  | 615  | 1.396 | 1.758 | 1.164 | #   | U6 |
| 1381190_at   | Lmo7         | LIM domain 7                                                  | 941  | 1.381 | 1.794 | 1.213 | *#  | U6 |
| 1389464_at   | Lnx1         | Ligand of numb-protein X 1                                    | 112  | 0.957 | 0.771 | 0.634 | #†  | D1 |
| 1374932_at   | LOC100361444 | rCG31799-like                                                 | 50   | 0.941 | 1.423 | 1.688 | #†  | U5 |
| 1389018_at   | LOC100362331 | rCG59612-like                                                 | 228  | 1.049 | 0.964 | 1.601 | †   | U5 |
| 1372213_at   | LOC500300    | Similar to hypothetical protein MGC6835                       | 489  | 1.418 | 1.684 | 1.497 | *#† | U0 |
| 1383675_at   | LOC679127    | Similar to Protein KIAA0690                                   | 150  | 1.343 | 1.767 | 1.361 | #   | U6 |
| 1386669_at   | LOC679127    | Similar to Protein KIAA0690                                   | 165  | 1.072 | 1.518 | 1.281 | #†  | U6 |
| 1383382_at   | LOC681740    | Similar to jumonji protein                                    | 287  | 1.993 | 1.155 | 1.066 | *#  | U3 |
| 1384390_at   | LOC681740    | Similar to jumonji protein                                    | 189  | 2.284 | 1.132 | 1.166 | *   | U3 |
| 1389984_at   | LOC681740    | Similar to jumonji protein                                    | 391  | 2.132 | 1.057 | 1.007 | *   | U3 |
| 1373659_at   | LOC689926    | Hypothetical protein LOC689926                                | 81   | 0.558 | 0.499 | 0.714 | *#  | D2 |
| 1368171_at   | Lox          | Lysyl oxidase                                                 | 638  | 1.171 | 1.281 | 1.913 | #†  | U5 |
| 1368172_a_at | Lox          | Lysyl oxidase                                                 | 392  | 1.036 | 1.198 | 1.804 | †   | U5 |

|              |           |                                                                       |     |        |       |       |     |    |
|--------------|-----------|-----------------------------------------------------------------------|-----|--------|-------|-------|-----|----|
| 1393177_at   | Lrch1     | Leucine-rich repeats and calponin homology (CH) domain containing 1   | 81  | 1.548  | 1.369 | 1.106 | *#  | U1 |
| 1389727_at   | Lrrc10    | Leucine-rich repeat-containing 10                                     | 440 | 0.524  | 0.337 | 0.828 | *#  | D2 |
| 1373755_at   | Lrrc39    | Leucine rich repeat containing 39                                     | 235 | 0.921  | 0.786 | 0.610 | †   | D1 |
| 1384178_at   | Lrrc4b    | Leucine rich repeat containing 4B                                     | 279 | 0.837  | 0.829 | 1.801 | †   | U5 |
| 1389351_at   | Lrrfp1    | Leucine rich repeat (in FLII) interacting protein 1                   | 282 | 1.454  | 1.658 | 1.309 | *#† | U6 |
| 1367912_at   | Ltbp1     | Latent transforming growth factor beta binding protein 1              | 79  | 1.358  | 2.220 | 1.574 | #   | U6 |
| 1380229_at   | Maff      | v-maf musculoaponeurotic fibrosarcoma oncogene homolog F (avian)      | 86  | 1.654  | 1.395 | 1.244 | *#† | U4 |
| 1372211_at   | Mafk      | v-maf musculoaponeurotic fibrosarcoma oncogene homolog K (avian)      | 338 | 1.746  | 1.631 | 1.284 | --- | U4 |
| 1387753_s_at | Magi3     | Membrane associated guanylate kinase, WW and PDZ domain containing 3  | 269 | 1.567  | 1.640 | 1.044 | --- | U2 |
| 1398866_at   | Magi3     | mMembrane associated guanylate kinase, WW and PDZ domain containing 3 | 135 | 1.720  | 1.989 | 1.160 | *#† | U2 |
| 1388858_at   | Map2k3    | Mitogen activated protein kinase kinase 3                             | 929 | 1.716  | 1.838 | 1.214 | *#† | U2 |
| 1378552_at   | Map3k6    | Mitogen-activated protein kinase kinase kinase 6                      | 135 | 1.298  | 1.537 | 1.186 | #   | U6 |
| 1389543_at   | Masp1     | Mannan-binding lectin serine peptidase 1                              | 173 | 0.930  | 0.993 | 0.596 | †   | D0 |
| 1391474_at   | Med14     | Mediator complex subunit 14                                           | 130 | 1.352  | 1.474 | 1.552 | --- | U0 |
| 1371479_at   | Mettl7a   | Methyltransferase like 7A                                             | 302 | 0.816  | 0.747 | 0.660 | †   | D1 |
| 1392547_at   | MGC105649 | Hypothetical LOC302884                                                | 70  | 1.230  | 1.643 | 1.501 | #†  | U0 |
| 1379059_at   | Micall2   | MICAL-like 2                                                          | 106 | 1.593  | 1.354 | 1.026 | *#  | U1 |
| 1383668_at   | Mmp15     | Matrix metalloproteinase 15                                           | 252 | 0.901  | 0.614 | 0.776 | #†  | D3 |
| 1372117_at   | Mtmr10    | Myotubularin related protein 10                                       | 80  | 1.310  | 1.569 | 1.227 | #   | U6 |
| 1373032_at   | Mustn1    | Musculoskeletal, embryonic nuclear protein 1                          | 92  | 1.365  | 1.629 | 1.442 | *#† | U0 |
| 1368308_at   | Myc       | Myelocytomatosis oncogene                                             | 275 | 2.313  | 1.684 | 1.679 | *#† | U4 |
| 1393639_at   | Myo10     | Myosin X                                                              | 46  | 1.508  | 1.605 | 1.123 | *#  | U2 |
| 1374088_at   | Mypn      | Myopalladin                                                           | 145 | 2.651  | 3.440 | 0.908 | *#  | U2 |
| 1389014_at   | Nampt     | Nicotinamide phosphoribosyltransferase                                | 344 | 1.634  | 1.449 | 1.135 | *#  | U1 |
| 1375861_at   | Nap1l5    | Nucleosome assembly protein 1-like 5                                  | 89  | 1.897  | 1.682 | 1.975 | *#† | U0 |
| 1375436_at   | Naprt1    | Nicotinate phosphoribosyltransferase domain containing 1              | 611 | 1.054  | 1.005 | 0.660 | †   | D0 |
| 1372953_at   | Ncald     | Neurocalcin delta                                                     | 138 | 1.315  | 1.515 | 1.298 | *#† | U6 |
| 1371360_at   | Ndrp1     | N-myc downstream regulated gene 1                                     | 358 | 1.269  | 1.692 | 1.136 | #   | U6 |
| 1368488_at   | Nfil3     | Nuclear factor, interleukin 3 regulated                               | 196 | 2.310  | 1.767 | 1.037 | *#  | U1 |
| 1370968_at   | Nfkb1     | Nuclear factor of kappa light polypeptide gene enhancer in B-cells 1  | 928 | 1.683  | 1.309 | 0.957 | *#  | U1 |
| 1370408_at   | Nid67     | Putative small membrane protein NID67                                 | 179 | 1.965  | 1.763 | 1.576 | *#† | U4 |
| 1374857_at   | Nola1     | Nucleolar protein family A, member 1 (H/ACA small nucleolar RNPs)     | 294 | 1.323  | 1.500 | 1.293 | #   | U6 |
| 1376362_at   | Nptxr     | Neuronal pentraxin receptor                                           | 69  | 1.375  | 1.632 | 1.491 | *#† | U0 |
| 1368376_at   | Nr0b2     | Nuclear receptor subfamily 0, group B, member 2                       | 77  | 0.622  | 0.622 | 0.801 | *#  | D2 |
| 1386935_at   | Nr4a1     | Nuclear receptor subfamily 4, group A, member 1                       | 156 | 4.283  | 3.152 | 1.345 | *#† | U1 |
| 1369007_at   | Nr4a2     | Nuclear receptor subfamily 4, group A, member 2                       | 58  | 1.871  | 1.278 | 1.189 | *   | U3 |
| 1369067_at   | Nr4a3     | Nuclear receptor subfamily 4, group A, member 3                       | 25  | 34.779 | 7.564 | 1.587 | *#  | U1 |
| 1393389_at   | Nr4a3     | Nuclear receptor subfamily 4, group A, member 3                       | 92  | 5.767  | 2.277 | 1.184 | *#  | U3 |
| 1379982_at   | Nrip1     | Nuclear receptor interacting protein 1                                | 64  | 1.598  | 0.968 | 0.928 | *   | U3 |
| 1369200_at   | Nt5e      | 5' nucleotidase, ecto                                                 | 357 | 1.433  | 1.859 | 1.825 | *#† | U0 |
| 1384112_at   | Nt5e      | 5' nucleotidase, ecto                                                 | 194 | 1.264  | 1.659 | 1.678 | #†  | U0 |
| 1387267_at   | Ntf3      | Neurotrophin 3                                                        | 94  | 0.826  | 0.744 | 0.609 | #†  | D1 |
| 1376128_at   | Ntn1      | Netrin 1                                                              | 313 | 1.178  | 1.005 | 0.540 | †   | D0 |
| 1383614_at   | Nuak2     | NUAK family, SNF1-like kinase, 2                                      | 112 | 1.593  | 1.186 | 0.839 | *   | U1 |
| 1382134_at   | Olfml1    | Olfactomedin-like 1                                                   | 401 | 1.083  | 0.739 | 0.665 | #†  | D1 |
| 1368683_at   | Olr1      | Oxidized low density lipoprotein (lectin-like) receptor 1             | 176 | 3.524  | 3.142 | 1.425 | *#  | U1 |
| 1384254_at   | Otud1     | OTU domain containing 1                                               | 385 | 3.067  | 3.230 | 1.539 | *#  | U2 |
| 1376924_a_at | Palmd     | Palmdelphin                                                           | 62  | 1.324  | 1.862 | 1.277 | #   | U6 |
| 1394966_at   | Pap2d     | Phosphatidic acid phosphatase type 2                                  | 76  | 0.933  | 0.839 | 1.662 | †   | U5 |
| 1375625_at   | Pagr8     | Progesterin and adipoQ receptor family member VIII                    | 148 | 0.862  | 0.628 | 0.893 | #   | D3 |
| 1383224_at   | Pard6b    | Par-6 (partitioning defective 6) homolog beta (C. elegans)            | 118 | 3.352  | 1.593 | 1.101 | *   | U3 |
| 1390227_at   | Pcp4l1    | Purkinje cell protein 4-like 1                                        | 199 | 0.886  | 0.945 | 0.620 | †   | D0 |

|              |         |                                                                                 |      |       |       |       |     |    |
|--------------|---------|---------------------------------------------------------------------------------|------|-------|-------|-------|-----|----|
| 1368438_at   | Pde10a  | Phosphodiesterase 10A                                                           | 187  | 2.557 | 2.428 | 1.240 | *#  | U2 |
| 1370669_a_at | Pde10a  | Phosphodiesterase 10A                                                           | 81   | 2.975 | 2.344 | 1.195 | *#  | U1 |
| 1369044_a_at | Pde4b   | Phosphodiesterase 4B, cAMP specific                                             | 256  | 1.349 | 1.618 | 1.326 | *#† | U6 |
| 1374157_at   | Pde4b   | Phosphodiesterase 4B, cAMP specific                                             | 448  | 1.271 | 1.660 | 1.460 | *#† | U0 |
| 1367892_at   | Pdk2    | Pyruvate dehydrogenase kinase, isozyme 2                                        | 780  | 0.946 | 0.738 | 0.653 | #†  | D1 |
| 1390942_at   | Peli2   | Pellino 2                                                                       | 142  | 1.701 | 0.867 | 0.889 | *   | U3 |
| 1371684_at   | Pelo    | Pelota homolog (Drosophila)                                                     | 777  | 1.624 | 1.675 | 1.078 | *#  | U2 |
| 1367949_at   | Penk1   | Proenkephalin 1                                                                 | 3855 | 1.597 | 1.651 | 1.090 | *#  | U2 |
| 1386961_at   | Pfkm    | Phosphofructokinase, muscle                                                     | 600  | 0.926 | 0.680 | 0.665 | #†  | D1 |
| 1367951_at   | Pgam2   | Phosphoglycerate mutase 2 (muscle)                                              | 273  | 1.080 | 1.063 | 0.612 | †   | D0 |
| 1375223_at   | Phactr1 | Phosphatase and actin regulator 1                                               | 138  | 0.878 | 0.619 | 0.534 | #†  | D1 |
| 1368860_at   | Phlda1  | Pleckstrin homology-like domain, family A, member 1                             | 185  | 2.886 | 1.764 | 1.529 | *#† | U3 |
| 1388525_at   | Pik3ip1 | Phosphoinositide-3-kinase interacting protein 1                                 | 369  | 0.350 | 0.433 | 0.670 | *#† | D2 |
| 1372199_at   | Pink1   | PTEN induced putative kinase 1                                                  | 338  | 1.025 | 0.951 | 0.544 | †   | D0 |
| 1372475_at   | Pink1   | PTEN induced putative kinase 1                                                  | 1465 | 1.078 | 0.966 | 0.607 | †   | D0 |
| 1387566_at   | Pla2g4a | Phospholipase A2, group IVA (cytosolic, calcium-dependent)                      | 122  | 1.330 | 1.500 | 1.281 | *#† | U6 |
| 1387122_at   | Plagl1  | Pleiomorphic adenoma gene-like 1                                                | 285  | 1.776 | 1.795 | 0.939 | *#  | U2 |
| 1387269_s_at | Plaur   | Plasminogen activator, urokinase receptor                                       | 109  | 2.033 | 1.622 | 1.345 | *#  | U4 |
| 1372897_at   | Plod2   | Procollagen lysine, 2-oxoglutarate 5-dioxygenase 2                              | 1549 | 1.103 | 1.202 | 1.538 | #†  | U5 |
| 1369029_at   | Plscr1  | Phospholipid scramblase 1                                                       | 118  | 2.602 | 2.441 | 1.750 | *#† | U4 |
| 1391435_at   | Pltp    | Phospholipid transfer protein                                                   | 768  | 1.083 | 0.942 | 0.577 | †   | D0 |
| 1389809_at   | Pmepa1  | Prostate transmembrane protein, androgen induced 1                              | 889  | 1.227 | 1.449 | 1.528 | #†  | U0 |
| 1392534_at   | Pmepa1  | Prostate transmembrane protein, androgen induced 1                              | 940  | 1.181 | 1.573 | 1.581 | #†  | U0 |
| 1387142_at   | Polb    | Polymerase (DNA directed), beta                                                 | 140  | 1.301 | 1.552 | 0.917 | *#  | U2 |
| 1370950_at   | Ppap2b  | Phosphatidic acid phosphatase type 2B                                           | 370  | 1.666 | 1.273 | 0.757 | --- | U1 |
| 1372531_at   | Ppfiip2 | PTPRF interacting protein, binding protein 2 (liprin beta 2)                    | 102  | 0.705 | 0.681 | 0.590 | *#† | D1 |
| 1373108_at   | Ppp1r3c | Protein phosphatase 1, regulatory (inhibitor) subunit 3C                        | 470  | 1.752 | 1.642 | 1.082 | *#  | U1 |
| 1395236_at   | Ppp1r3c | Protein phosphatase 1, regulatory (inhibitor) subunit 3C                        | 83   | 1.657 | 1.350 | 1.134 | *   | U1 |
| 1387803_at   | Ppp2r2b | Protein phosphatase 2 (formerly 2A), regulatory subunit B (PR 52), beta isoform | 291  | 1.172 | 1.518 | 0.958 | #   | U2 |
| 1368277_at   | Ppp3ca  | Protein phosphatase 3 (formerly 2B), catalytic subunit, alpha isoform           | 642  | 1.184 | 1.514 | 1.309 | #   | U6 |
| 1391121_at   | Pragmin | Pragma of Rnd2                                                                  | 81   | 2.399 | 1.636 | 1.072 | *#  | U1 |
| 1373152_at   | Prss23  | Protease, serine, 23                                                            | 1556 | 1.451 | 1.704 | 1.516 | *#† | U0 |
| 1367851_at   | Ptgds   | Prostaglandin D2 synthase (brain)                                               | 197  | 1.097 | 0.999 | 0.562 | †   | D0 |
| 1368014_at   | Ptges   | Prostaglandin E synthase                                                        | 81   | 2.037 | 1.391 | 0.898 | *#  | U1 |
| 1370012_at   | Ptgis   | Prostaglandin I2 (prostacyclin) synthase                                        | 1004 | 1.075 | 1.326 | 2.189 | †   | U5 |
| 1370193_at   | Ptp4a1  | Protein tyrosine phosphatase 4a1                                                | 1065 | 1.530 | 1.455 | 1.132 | *#  | U1 |
| 1382154_at   | Ptpn12  | Protein tyrosine phosphatase, non-receptor type 12                              | 445  | 1.748 | 1.428 | 1.195 | *#  | U1 |
| 1370362_at   | Ptpn    | Protein tyrosine phosphatase, receptor type, N                                  | 540  | 1.479 | 1.614 | 1.212 | *#† | U2 |
| 1370177_at   | PVR     | Poliovirus receptor                                                             | 206  | 2.936 | 2.792 | 1.595 | *#† | U4 |
| 1389873_at   | Pycard  | PYD and CARD domain containing                                                  | 243  | 0.938 | 0.851 | 0.641 | †   | D1 |
| 1379606_at   | Rab30   | RAB30, member RAS oncogene family                                               | 298  | 1.659 | 1.315 | 1.021 | *   | U1 |
| 1370061_at   | Rab3b   | RAB3B, member RAS oncogene family                                               | 182  | 1.003 | 0.921 | 0.561 | †   | D0 |
| 1384528_at   | Rai14   | Retinoic acid induced 14                                                        | 81   | 1.319 | 1.357 | 1.654 | †   | U0 |
| 1389263_at   | Rai14   | Retinoic acid induced 14                                                        | 687  | 1.291 | 1.566 | 1.623 | --- | U0 |
| 1373666_at   | Rapgef5 | Rap guanine nucleotide exchange factor (GEF) 5                                  | 69   | 1.470 | 1.543 | 0.950 | *#  | U2 |
| 1383322_at   | Rasl11b | RAS-like family 11 member B                                                     | 527  | 1.759 | 2.268 | 1.663 | #   | U6 |
| 1373923_at   | Rdh10   | Retinol dehydrogenase 10 (all-trans)                                            | 88   | 1.554 | 1.539 | 0.939 | *#  | U2 |
| 1384391_at   | Rdh10   | Retinol dehydrogenase 10 (all-trans)                                            | 84   | 1.678 | 1.381 | 1.114 | *   | U1 |
| 1393351_at   | Rdh10   | Retinol dehydrogenase 10 (all-trans)                                            | 42   | 2.067 | 1.355 | 1.064 | *   | U3 |
| 1374448_at   | Reck    | Reversion-inducing-cysteine-rich protein with kazal motifs                      | 490  | 1.420 | 1.879 | 1.240 | #   | U6 |
| 1368238_at   | Reg3b   | Regenerating islet-derived 3 beta                                               | 5202 | 0.946 | 0.954 | 0.478 | †   | D0 |

|              |                        |                                                                                                  |      |       |       |       |     |    |
|--------------|------------------------|--------------------------------------------------------------------------------------------------|------|-------|-------|-------|-----|----|
| 1373957_at   | Reln                   | Reelin                                                                                           | 149  | 1.245 | 1.541 | 1.174 | #   | U6 |
| 1376645_at   | RGD1307396             | Similar to RIKEN cDNA 6330406115                                                                 | 248  | 2.794 | 2.682 | 1.496 | *#† | U4 |
| 1395765_at   | RGD1307396             | Similar to RIKEN cDNA 6330406115                                                                 | 75   | 1.822 | 1.582 | 1.172 | *#  | U1 |
| 1397848_at   | RGD1307396             | Similar to RIKEN cDNA 6330406115                                                                 | 33   | 2.563 | 2.073 | 1.459 | *#† | U4 |
| 1398485_at   | RGD1307396             | Similar to RIKEN cDNA 6330406115                                                                 | 50   | 1.607 | 1.443 | 1.187 | *#  | U4 |
| 1383258_at   | RGD1310587             | Similar to hypothetical protein FLJ14146                                                         | 41   | 1.248 | 1.536 | 0.911 | #   | U2 |
| 1367495_at   | RGD1560211             | Similar to prefoldin 4                                                                           | 499  | 1.351 | 1.537 | 1.348 | #   | U6 |
| 1383874_at   | RGD1560812             | RGD1560812                                                                                       | 114  | 1.531 | 1.227 | 1.027 | *#  | U3 |
| 1390051_at   | RGD1562533             | Similar to mKIAA0774 protein                                                                     | 191  | 1.658 | 1.916 | 1.034 | #   | U2 |
| 1367998_at   | RGD1563818 ///<br>Slpi | Similar to secretory leukocyte protease inhibitor /// secretory leukocyte<br>peptidase inhibitor | 378  | 1.490 | 1.834 | 1.145 | *#  | U2 |
| 1384943_at   | RGD1563888             | Similar to DNA segment, Chr 16, ERATO Doi 472, expressed                                         | 61   | 1.552 | 1.359 | 1.086 | *   | U1 |
| 1390443_at   | RGD1563888             | Similar to DNA segment, Chr 16, ERATO Doi 472, expressed                                         | 128  | 1.575 | 1.502 | 1.056 | *#  | U1 |
| 1389639_at   | RGD1565350             | Similar to Shb protein                                                                           | 333  | 1.533 | 1.810 | 1.426 | #   | U6 |
| 1371731_at   | RGD1566215             | Similar to Coatomer gamma-2 subunit (Gamma-2 coat protein) (Gamma-2<br>COP)                      | 1319 | 1.074 | 1.058 | 0.647 | †   | D0 |
| 1395145_at   | Rgl1                   | Ral guanine nucleotide dissociation stimulator,-like 1                                           | 358  | 0.855 | 0.663 | 0.826 | #   | D3 |
| 1368144_at   | Rgs2                   | Regulator of G-protein signaling 2                                                               | 268  | 3.163 | 2.440 | 2.158 | *#† | U4 |
| 1387074_at   | Rgs2                   | Regulator of G-protein signaling 2                                                               | 661  | 3.261 | 2.882 | 2.178 | *#† | U4 |
| 1379517_at   | Rgs6                   | Regulator of G protein signaling 6                                                               | 152  | 1.093 | 0.926 | 0.623 | †   | D0 |
| 1381279_at   | Ripk2                  | Receptor-interacting serine-threonine kinase 2                                                   | 188  | 1.615 | 1.339 | 1.295 | *   | U4 |
| 1367544_at   | Rnf111                 | Ring finger protein 111                                                                          | 131  | 1.642 | 1.690 | 1.201 | *#† | U2 |
| 1373456_at   | Rnf111                 | Ring finger protein 111                                                                          | 485  | 1.765 | 1.610 | 1.320 | *#  | U4 |
| 1393045_at   | Rock2                  | Rho-associated coiled-coil containing protein kinase 2                                           | 384  | 1.577 | 1.581 | 1.292 | *#  | U4 |
| 1398732_at   | Rpl7a                  | 60S ribosomal protein L7a                                                                        | 128  | 0.978 | 1.032 | 1.823 | †   | U5 |
| 1367862_at   | Rrad                   | Ras-related associated with diabetes                                                             | 854  | 0.762 | 0.705 | 0.412 | †   | D1 |
| 1373427_at   | Rragd                  | Ras-related GTP binding D                                                                        | 131  | 1.079 | 0.829 | 0.590 | †   | D1 |
| 1376065_at   | Rrs1                   | RRS1 ribosome biogenesis regulator homolog (S. cerevisiae)                                       | 143  | 1.262 | 1.595 | 1.362 | #   | U6 |
| 1371840_at   | S1pr1                  | Sphingosine-1-phosphate receptor 1                                                               | 945  | 1.784 | 1.875 | 1.097 | *#  | U2 |
| 1376150_at   | S1pr3                  | Sphingosine-1-phosphate receptor 3                                                               | 607  | 1.552 | 1.512 | 0.948 | *#  | U2 |
| 1371774_at   | Sat1                   | Spermidine/spermine N1-acetyl transferase 1                                                      | 1049 | 1.484 | 1.537 | 1.118 | *#  | U2 |
| 1387926_at   | Sc5dl                  | Sterol-C5-desaturase (ERG3 delta-5-desaturase homolog, S. cerevisiae)-like                       | 430  | 1.100 | 1.067 | 1.558 | †   | U5 |
| 1370355_at   | Scd1                   | Stearoyl-Coenzyme A desaturase 1                                                                 | 339  | 1.060 | 1.088 | 2.027 | †   | U5 |
| 1367721_at   | Sdc4                   | Syndecan 4                                                                                       | 1315 | 1.589 | 1.617 | 1.171 | *#  | U2 |
| 1376319_at   | Sema3c                 | Sema domain, immunoglobulin domain (Ig), short basic domain, secreted,<br>(semaphorin) 3C        | 577  | 1.225 | 1.428 | 2.703 | †   | U5 |
| 1368519_at   | Serpine1               | Serine (or cysteine) peptidase inhibitor, clade E, member 1                                      | 131  | 1.931 | 1.629 | 2.155 | *†  | U0 |
| 1392264_s_at | Serpine1               | Serine (or cysteine) peptidase inhibitor, clade E, member 1                                      | 70   | 1.590 | 1.553 | 1.700 | --- | U0 |
| 1391537_at   | Sertad4                | SERTA domain containing 4                                                                        | 324  | 0.636 | 1.003 | 1.282 | *   | D2 |
| 1395809_at   | Sesn1                  | Sestrin 1                                                                                        | 130  | 0.819 | 0.663 | 0.868 | #   | D3 |
| 1382878_at   | Sfrp1                  | Secreted frizzled-related protein 1                                                              | 233  | 1.263 | 1.758 | 1.681 | --- | U0 |
| 1383266_at   | Sfrp1                  | Secreted frizzled-related protein 1                                                              | 65   | 1.247 | 1.931 | 2.064 | #†  | U0 |
| 1389203_at   | Sh3bp5l                | SH3 binding domain protein 5 like                                                                | 209  | 1.392 | 1.519 | 1.051 | *#  | U2 |
| 1368965_at   | Slc16a3                | Solute carrier family 16, member 3 (monocarboxylic acid transporter 4)                           | 483  | 1.059 | 1.471 | 2.057 | #†  | U5 |
| 1370314_at   | Slc20a1                | Solute carrier family 20 (phosphate transporter), member 1                                       | 766  | 1.581 | 1.484 | 1.286 | *#  | U4 |
| 1372326_at   | Slc2a3                 | Solute carrier family 2 (facilitated glucose transporter), member 3                              | 66   | 2.009 | 1.716 | 1.499 | *#† | U4 |
| 1387130_at   | Slc40a1                | Solute carrier family 39 (iron-regulated transporter), member 1                                  | 444  | 0.868 | 0.612 | 0.838 | #   | D3 |
| 1373953_at   | Slc4a1ap               | Solute carrier family 4 (anion exchanger), member 1, adaptor protein                             | 639  | 0.994 | 0.974 | 0.504 | †   | D0 |
| 1368391_at   | Slc7a1                 | Solute carrier family 7 (cationic amino acid transporter, y+ system), member<br>1                | 419  | 1.439 | 1.626 | 1.455 | *#† | U0 |
| 1377916_at   | Slfn2                  | Schlafen 2                                                                                       | 460  | 1.579 | 1.435 | 0.902 | *#  | U1 |
| 1387134_at   | Slfn3                  | Schlafen 3                                                                                       | 145  | 1.589 | 1.459 | 0.916 | *#  | U1 |

|              |               |                                                                                                   |      |       |       |       |     |    |
|--------------|---------------|---------------------------------------------------------------------------------------------------|------|-------|-------|-------|-----|----|
| 1384246_at   | Smarca5       | SWI/SNF related, matrix associated, actin dependent regulator of chromatin, subfamily a, member 5 | 121  | 1.324 | 1.579 | 1.366 | #   | U6 |
| 1392965_a_at | Smoc2         | SPARC related modular calcium binding 2                                                           | 267  | 0.962 | 1.187 | 0.459 | †   | D0 |
| 1373699_at   | Sned1         | Sushi, nidogen and EGF-like domains 1                                                             | 452  | 1.240 | 1.217 | 0.506 | †   | D0 |
| 1380250_at   | Sned1         | Sushi, nidogen and EGF-like domains 1                                                             | 440  | 1.151 | 1.150 | 0.570 | †   | D0 |
| 1368596_at   | Snf1lk        | SNF1-like kinase                                                                                  | 277  | 3.464 | 2.944 | 1.720 | *#† | U4 |
| 1368597_at   | Snf1lk        | SNF1-like kinase                                                                                  | 83   | 2.313 | 1.710 | 1.295 | *   | U1 |
| 1390298_at   | Snx18         | Sorting nexin 18                                                                                  | 728  | 1.610 | 1.292 | 1.150 | *   | U3 |
| 1374168_at   | Sphkap        | SPHK1 interactor, AKAP domain containing                                                          | 507  | 0.996 | 0.761 | 0.532 | #†  | D1 |
| 1384243_at   | Spsb4         | splA/ryanodine receptor domain and SOCS box containing 4                                          | 109  | 1.462 | 2.712 | 1.443 | #   | U6 |
| 1372510_at   | Srxn1         | Sulfiredoxin 1 homolog (S. cerevisiae)                                                            | 285  | 2.000 | 1.304 | 1.432 | *#† | U3 |
| 1384331_at   | Srxn1         | Sulfiredoxin 1 homolog (S. cerevisiae)                                                            | 197  | 1.963 | 1.203 | 1.528 | *†  | U3 |
| 1370714_a_at | St6gal1       | ST6 beta-galactosamide alpha-2,6-sialyltransferase 1                                              | 69   | 0.837 | 0.662 | 1.018 | #   | D2 |
| 1385397_at   | Steap4        | STEAP family member 4                                                                             | 238  | 1.051 | 0.678 | 0.448 | †   | D1 |
| 1390489_at   | Syncrip       | Synaptotagmin binding, cytoplasmic RNA interacting protein                                        | 226  | 1.537 | 1.488 | 1.217 | *#  | U4 |
| 1390107_at   | Sytl2         | synaptotagmin-like 2                                                                              | 99   | 1.445 | 1.587 | 0.990 | *#  | U2 |
| 1383401_at   | Tes           | Testis derived transcript                                                                         | 192  | 1.365 | 1.665 | 1.308 | #   | U6 |
| 1367859_at   | Tgfb3         | Transforming growth factor, beta 3                                                                | 412  | 1.435 | 1.856 | 1.420 | #   | U6 |
| 1368900_at   | Thbd          | Thrombomodulin                                                                                    | 67   | 2.672 | 2.613 | 0.991 | *#  | U2 |
| 1368901_at   | Thbd          | Thrombomodulin                                                                                    | 55   | 3.942 | 4.009 | 0.848 | *#  | U2 |
| 1375951_at   | Thbd          | Thrombomodulin                                                                                    | 52   | 4.546 | 5.304 | 1.050 | *#  | U2 |
| 1388497_at   | Them2         | Thioesterase superfamily member 2                                                                 | 425  | 1.009 | 0.923 | 0.648 | †   | D0 |
| 1367650_at   | Tinagl1       | Tubulointerstitial nephritis antigen-like 1                                                       | 190  | 1.047 | 1.214 | 1.690 | --- | U5 |
| 1390832_at   | Tmcc3         | Transmembrane and coiled-coil domain family 3                                                     | 222  | 0.558 | 0.817 | 1.189 | *#  | D2 |
| 1377772_at   | Tmeff1        | Transmembrane protein with EGF-like and two follistatin-like domains 1                            | 170  | 1.271 | 2.081 | 1.518 | #†  | U6 |
| 1387850_at   | Tmeff1        | Transmembrane protein with EGF-like and two follistatin-like domains 1                            | 78   | 1.511 | 1.958 | 1.654 | *#† | U0 |
| 1373204_at   | Tmem176a      | Transmembrane protein 176A                                                                        | 885  | 1.063 | 0.966 | 0.632 | †   | D0 |
| 1394160_at   | Tmem2         | Transmembrane protein 2                                                                           | 187  | 1.669 | 1.452 | 1.135 | *   | U1 |
| 1383314_at   | Tmem51        | Transmembrane protein 51                                                                          | 396  | 0.737 | 1.096 | 1.583 | --- | U5 |
| 1389583_at   | Tmem82        | Transmembrane protein 82                                                                          | 117  | 0.914 | 0.677 | 0.607 | †   | D1 |
| 1372156_at   | Tmem97        | Transmembrane protein 97                                                                          | 748  | 1.204 | 1.303 | 1.527 | *#† | U0 |
| 1370442_at   | Tmsbl1        | Thymosin beta-like protein 1                                                                      | 333  | 1.265 | 1.515 | 1.428 | *#† | U0 |
| 1373401_at   | Tnc           | Tenascin C                                                                                        | 262  | 1.657 | 1.536 | 1.341 | *#† | U4 |
| 1371194_at   | Tnfaip6       | Tumor necrosis factor alpha induced protein 6                                                     | 246  | 2.540 | 1.576 | 1.264 | *   | U3 |
| 1388145_at   | Tnxa /// Tnxb | Tenascin XA /// tenascin XB                                                                       | 251  | 1.058 | 0.996 | 0.654 | †   | D0 |
| 1370198_at   | Trdn          | Triadin                                                                                           | 118  | 1.200 | 1.127 | 0.594 | †   | D0 |
| 1373578_at   | Trim2         | Tripartite motif-containing 2                                                                     | 235  | 0.792 | 0.627 | 0.747 | #   | D3 |
| 1384238_at   | Ttyh2         | Tweety homolog 2 (Drosophila)                                                                     | 328  | 1.935 | 1.534 | 1.042 | *#  | U1 |
| 1371618_s_at | Tubb3         | Tubulin, beta 3                                                                                   | 181  | 1.100 | 0.845 | 1.534 | #†  | U5 |
| 1372403_at   | Uaca          | Uveal autoantigen with coiled-coil domains and ankyrin repeats                                    | 322  | 1.337 | 1.586 | 1.194 | #   | U6 |
| 1379910_at   | Uap1          | UDP-N-acteylglucosamine pyrophosphorylase 1                                                       | 226  | 6.023 | 6.867 | 1.764 | *#† | U2 |
| 1383945_at   | Uck2          | Uridine-cytidine kinase 2                                                                         | 272  | 1.468 | 1.645 | 1.394 | *#† | U6 |
| 1367938_at   | Ugdh          | UDP-glucose dehydrogenase                                                                         | 1318 | 1.754 | 1.850 | 1.253 | *#† | U2 |
| 1369235_at   | Unc5b         | Unc-5 homolog B (C. elegans)                                                                      | 530  | 0.983 | 1.219 | 1.618 | †   | U5 |
| 1393799_at   | Unc5b         | Unc-5 homolog B (C. elegans)                                                                      | 784  | 0.910 | 1.168 | 1.519 | †   | U5 |
| 1371595_at   | Unknown       | Unknown                                                                                           | 1154 | 1.596 | 1.429 | 1.133 | *#  | U1 |
| 1371699_at   | Unknown       | Unknown                                                                                           | 532  | 1.622 | 2.336 | 1.457 | *#† | U6 |
| 1371861_at   | Unknown       | Unknown                                                                                           | 344  | 1.321 | 2.028 | 1.596 | *#† | U6 |
| 1372011_at   | Unknown       | Unknown                                                                                           | 650  | 1.716 | 2.021 | 1.109 | *#  | U2 |
| 1372095_at   | Unknown       | Unknown                                                                                           | 170  | 0.814 | 0.717 | 0.646 | †   | D1 |
| 1372347_at   | Unknown       | Unknown                                                                                           | 456  | 1.451 | 1.695 | 1.688 | *#† | U0 |
| 1372371_at   | Unknown       | Unknown                                                                                           | 296  | 1.363 | 1.516 | 1.146 | *#  | U2 |



|              |         |         |      |       |       |       |     |    |
|--------------|---------|---------|------|-------|-------|-------|-----|----|
| 1372583_at   | Unknown | Unknown | 78   | 0.871 | 1.001 | 1.652 | †   | U5 |
| 1372642_at   | Unknown | Unknown | 274  | 1.489 | 1.513 | 1.257 | *#† | U4 |
| 1372750_at   | Unknown | Unknown | 127  | 1.478 | 1.528 | 1.757 | *#† | U0 |
| 1372964_at   | Unknown | Unknown | 426  | 1.500 | 1.237 | 1.048 | *   | U1 |
| 1373035_at   | Unknown | Unknown | 473  | 1.708 | 1.617 | 1.307 | *#  | U4 |
| 1373298_at   | Unknown | Unknown | 56   | 1.490 | 1.733 | 1.293 | *#† | U6 |
| 1373628_at   | Unknown | Unknown | 110  | 1.019 | 1.018 | 2.027 | †   | U5 |
| 1373676_at   | Unknown | Unknown | 236  | 1.506 | 1.586 | 1.330 | *#† | U4 |
| 1373701_at   | Unknown | Unknown | 542  | 0.909 | 1.162 | 1.550 | †   | U5 |
| 1373843_at   | Unknown | Unknown | 961  | 1.440 | 1.573 | 1.201 | *#† | U2 |
| 1374529_at   | Unknown | Unknown | 2561 | 1.935 | 1.608 | 1.458 | *#† | U4 |
| 1374610_at   | Unknown | Unknown | 127  | 3.764 | 3.195 | 1.120 | *#  | U1 |
| 1374702_at   | Unknown | Unknown | 469  | 1.531 | 1.694 | 1.254 | *#  | U2 |
| 1374710_at   | Unknown | Unknown | 589  | 1.592 | 1.923 | 1.494 | #   | U6 |
| 1374758_at   | Unknown | Unknown | 174  | 1.235 | 1.508 | 1.326 | --- | U6 |
| 1374814_at   | Unknown | Unknown | 458  | 0.879 | 0.657 | 0.834 | #   | D3 |
| 1374893_at   | Unknown | Unknown | 346  | 1.253 | 1.956 | 1.259 | #   | U6 |
| 1374916_at   | Unknown | Unknown | 119  | 1.365 | 1.621 | 1.260 | #   | U6 |
| 1374934_at   | Unknown | Unknown | 221  | 1.027 | 0.870 | 0.641 | †   | D0 |
| 1375904_at   | Unknown | Unknown | 160  | 1.406 | 1.515 | 1.214 | *#† | U4 |
| 1376021_at   | Unknown | Unknown | 646  | 1.491 | 1.580 | 1.147 | *#  | U2 |
| 1376076_at   | Unknown | Unknown | 276  | 1.504 | 1.476 | 1.253 | *#  | U4 |
| 1376275_at   | Unknown | Unknown | 189  | 1.669 | 1.327 | 1.095 | *   | U1 |
| 1376282_at   | Unknown | Unknown | 359  | 1.275 | 1.682 | 1.215 | #   | U6 |
| 1376395_at   | Unknown | Unknown | 53   | 1.572 | 1.132 | 0.986 | *   | U3 |
| 1376435_at   | Unknown | Unknown | 48   | 1.377 | 1.743 | 1.002 | #   | U2 |
| 1376513_a_at | Unknown | Unknown | 247  | 1.108 | 1.311 | 1.508 | †   | U5 |
| 1376627_at   | Unknown | Unknown | 214  | 1.581 | 1.394 | 1.303 | --- | U4 |
| 1376848_at   | Unknown | Unknown | 254  | 1.627 | 1.433 | 1.152 | *   | U1 |
| 1376869_at   | Unknown | Unknown | 196  | 1.508 | 1.277 | 1.069 | *#  | U1 |
| 1377240_at   | Unknown | Unknown | 83   | 1.347 | 2.017 | 1.792 | *#† | U0 |
| 1377328_at   | Unknown | Unknown | 100  | 0.727 | 0.633 | 0.863 | #   | D2 |
| 1377469_at   | Unknown | Unknown | 55   | 1.222 | 1.531 | 1.163 | #   | U6 |
| 1377636_at   | Unknown | Unknown | 156  | 1.249 | 1.645 | 1.245 | *#† | U6 |
| 1377705_at   | Unknown | Unknown | 1294 | 1.134 | 1.125 | 1.878 | †   | U5 |
| 1377706_x_at | Unknown | Unknown | 1131 | 1.211 | 1.174 | 2.035 | †   | U5 |
| 1377789_at   | Unknown | Unknown | 46   | 2.354 | 2.184 | 1.355 | *#  | U4 |
| 1377994_at   | Unknown | Unknown | 42   | 1.112 | 1.251 | 1.852 | †   | U5 |
| 1378074_at   | Unknown | Unknown | 70   | 0.875 | 0.558 | 0.801 | *#† | D3 |
| 1378413_at   | Unknown | Unknown | 455  | 1.030 | 0.806 | 0.647 | †   | D1 |
| 1378414_at   | Unknown | Unknown | 254  | 1.016 | 1.590 | 1.245 | #   | U6 |
| 1378467_at   | Unknown | Unknown | 57   | 1.688 | 1.293 | 1.379 | *   | U4 |
| 1378556_at   | Unknown | Unknown | 313  | 1.183 | 1.229 | 1.892 | *#† | U5 |
| 1379332_at   | Unknown | Unknown | 78   | 1.511 | 1.514 | 1.190 | *#  | U4 |
| 1379534_at   | Unknown | Unknown | 129  | 0.765 | 0.511 | 0.589 | #†  | D3 |
| 1379598_at   | Unknown | Unknown | 176  | 1.441 | 2.161 | 1.776 | #†  | U0 |
| 1379607_at   | Unknown | Unknown | 64   | 3.034 | 2.578 | 1.141 | *#  | U1 |
| 1379733_at   | Unknown | Unknown | 78   | 0.738 | 0.641 | 1.018 | *#  | D2 |
| 1379799_at   | Unknown | Unknown | 121  | 0.818 | 1.376 | 1.634 | †   | U5 |
| 1380306_at   | Unknown | Unknown | 34   | 1.724 | 1.144 | 0.921 | *   | U3 |
| 1380318_at   | Unknown | Unknown | 312  | 0.812 | 0.512 | 0.950 | #   | D3 |
| 1380494_at   | Unknown | Unknown | 272  | 0.973 | 1.012 | 0.524 | †   | D0 |

|              |         |         |     |       |       |       |     |    |
|--------------|---------|---------|-----|-------|-------|-------|-----|----|
| 1380831_at   | Unknown | Unknown | 58  | 1.503 | 1.852 | 1.200 | #   | U2 |
| 1381016_at   | Unknown | Unknown | 149 | 1.603 | 1.236 | 1.111 | *   | U3 |
| 1381163_at   | Unknown | Unknown | 110 | 1.238 | 1.531 | 1.328 | #   | U6 |
| 1381431_at   | Unknown | Unknown | 42  | 1.554 | 1.364 | 1.077 | *   | U1 |
| 1382296_at   | Unknown | Unknown | 138 | 0.736 | 0.601 | 1.047 | #   | D2 |
| 1382512_at   | Unknown | Unknown | 183 | 1.514 | 1.585 | 1.218 | *#† | U4 |
| 1382647_at   | Unknown | Unknown | 57  | 1.685 | 1.908 | 1.127 | *#  | U2 |
| 1382651_at   | Unknown | Unknown | 59  | 1.328 | 1.974 | 1.058 | *#  | U2 |
| 1382882_x_at | Unknown | Unknown | 32  | 2.636 | 1.787 | 1.298 | *#  | U1 |
| 1382914_at   | Unknown | Unknown | 151 | 1.222 | 1.421 | 1.888 | †   | U5 |
| 1383058_at   | Unknown | Unknown | 494 | 0.560 | 0.582 | 0.998 | *#  | D2 |
| 1383169_at   | Unknown | Unknown | 610 | 0.818 | 0.676 | 0.587 | #†  | D1 |
| 1383210_at   | Unknown | Unknown | 67  | 1.809 | 1.192 | 1.197 | *   | U3 |
| 1383222_at   | Unknown | Unknown | 331 | 1.642 | 1.419 | 1.086 | *#  | U1 |
| 1383486_at   | Unknown | Unknown | 108 | 2.681 | 3.353 | 2.880 | *#† | U0 |
| 1383744_at   | Unknown | Unknown | 644 | 1.354 | 1.526 | 1.159 | #   | U2 |
| 1383852_at   | Unknown | Unknown | 87  | 1.385 | 1.948 | 1.498 | #   | U6 |
| 1383939_at   | Unknown | Unknown | 462 | 1.437 | 1.651 | 1.420 | *#† | U6 |
| 1384051_at   | Unknown | Unknown | 132 | 0.952 | 1.217 | 1.747 | #†  | U5 |
| 1384188_at   | Unknown | Unknown | 134 | 0.872 | 0.752 | 0.644 | #†  | D1 |
| 1384882_at   | Unknown | Unknown | 88  | 1.575 | 1.547 | 1.391 | *#† | U4 |
| 1384899_at   | Unknown | Unknown | 68  | 1.607 | 1.233 | 1.093 | *   | U3 |
| 1385053_at   | Unknown | Unknown | 88  | 1.049 | 0.742 | 0.606 | #†  | D1 |
| 1385082_at   | Unknown | Unknown | 111 | 1.051 | 0.718 | 0.573 | †   | D1 |
| 1385132_at   | Unknown | Unknown | 44  | 1.760 | 3.153 | 2.689 | *#† | U0 |
| 1385869_at   | Unknown | Unknown | 143 | 1.500 | 1.397 | 1.130 | *#  | U1 |
| 1385925_at   | Unknown | Unknown | 460 | 1.133 | 1.233 | 1.548 | †   | U5 |
| 1385948_at   | Unknown | Unknown | 188 | 1.407 | 1.609 | 0.884 | *#  | U2 |
| 1388872_at   | Unknown | Unknown | 808 | 1.159 | 1.113 | 1.535 | †   | U5 |
| 1389127_at   | Unknown | Unknown | 329 | 1.703 | 1.411 | 1.044 | *#  | U1 |
| 1389194_at   | Unknown | Unknown | 629 | 1.578 | 1.955 | 1.380 | *#† | U6 |
| 1389206_at   | Unknown | Unknown | 51  | 2.050 | 1.178 | 1.075 | *   | U3 |
| 1389412_at   | Unknown | Unknown | 300 | 1.872 | 1.481 | 0.963 | *#  | U1 |
| 1389465_at   | Unknown | Unknown | 332 | 1.335 | 1.586 | 1.105 | #   | U2 |
| 1389565_at   | Unknown | Unknown | 129 | 1.653 | 1.320 | 1.026 | *#  | U1 |
| 1389586_at   | Unknown | Unknown | 312 | 1.686 | 1.915 | 1.251 | *#† | U2 |
| 1389618_at   | Unknown | Unknown | 290 | 0.492 | 0.541 | 0.636 | *#† | D2 |
| 1389700_at   | Unknown | Unknown | 87  | 1.867 | 1.523 | 1.245 | *#† | U1 |
| 1390117_at   | Unknown | Unknown | 454 | 1.529 | 1.266 | 0.874 | *#  | U1 |
| 1390515_at   | Unknown | Unknown | 210 | 1.163 | 1.509 | 1.186 | #   | U6 |
| 1390645_at   | Unknown | Unknown | 57  | 1.409 | 1.673 | 1.015 | #   | U2 |
| 1390659_at   | Unknown | Unknown | 293 | 2.273 | 2.577 | 1.679 | *#† | U4 |
| 1391481_at   | Unknown | Unknown | 117 | 1.219 | 1.549 | 1.524 | #†  | U0 |
| 1391582_at   | Unknown | Unknown | 116 | 1.530 | 1.364 | 1.025 | *#  | U1 |
| 1391758_at   | Unknown | Unknown | 363 | 0.949 | 0.649 | 0.745 | --- | D3 |
| 1392627_x_at | Unknown | Unknown | 348 | 0.943 | 0.960 | 1.525 | †   | U5 |
| 1393003_at   | Unknown | Unknown | 261 | 1.455 | 1.507 | 1.371 | *#† | U4 |
| 1393119_at   | Unknown | Unknown | 256 | 1.767 | 1.625 | 1.737 | *#† | U0 |
| 1393262_at   | Unknown | Unknown | 141 | 0.625 | 0.867 | 0.852 | *   | D2 |
| 1393478_at   | Unknown | Unknown | 294 | 1.933 | 1.369 | 1.185 | *   | U3 |
| 1393728_at   | Unknown | Unknown | 76  | 1.277 | 1.659 | 1.543 | --- | U0 |
| 1393743_at   | Unknown | Unknown | 120 | 0.674 | 0.609 | 0.818 | --- | D2 |

|              |         |                                                 |     |       |       |       |     |    |
|--------------|---------|-------------------------------------------------|-----|-------|-------|-------|-----|----|
| 1394047_at   | Unknown | Unknown                                         | 43  | 1.554 | 1.499 | 1.068 | *#  | U1 |
| 1394109_at   | Unknown | Unknown                                         | 738 | 2.788 | 2.079 | 1.795 | *#† | U4 |
| 1395119_at   | Unknown | Unknown                                         | 95  | 2.173 | 3.227 | 1.274 | *#  | U2 |
| 1395362_at   | Unknown | Unknown                                         | 372 | 1.181 | 1.330 | 1.577 | #†  | U5 |
| 1395442_at   | Unknown | Unknown                                         | 49  | 1.590 | 1.585 | 1.571 | *#† | U0 |
| 1395518_at   | Unknown | Unknown                                         | 242 | 0.628 | 0.560 | 0.716 | *#† | D2 |
| 1395557_at   | Unknown | Unknown                                         | 157 | 1.618 | 1.315 | 1.472 | *†  | U4 |
| 1395645_at   | Unknown | Unknown                                         | 198 | 1.493 | 1.653 | 1.179 | *#  | U2 |
| 1396539_at   | Unknown | Unknown                                         | 88  | 1.782 | 1.340 | 1.152 | *   | U3 |
| 1397164_at   | Unknown | Unknown                                         | 308 | 1.860 | 1.500 | 1.198 | *   | U1 |
| 1397540_at   | Unknown | Unknown                                         | 309 | 0.877 | 0.721 | 0.649 | #†  | D1 |
| 1397750_at   | Unknown | Unknown                                         | 155 | 1.235 | 1.502 | 1.168 | #   | U6 |
| 1397766_at   | Unknown | Unknown                                         | 32  | 2.109 | 1.250 | 1.109 | *   | U3 |
| 1398348_at   | Unknown | Unknown                                         | 511 | 1.071 | 1.130 | 1.967 | †   | U5 |
| 1398597_at   | Unknown | Unknown                                         | 239 | 0.645 | 0.689 | 1.060 | *#  | D2 |
| 1373510_at   | Vamp1   | Vesicle-associated membrane protein 1           | 147 | 0.968 | 0.889 | 0.625 | †   | D0 |
| 1368474_at   | Vcam1   | Vascular cell adhesion molecule 1               | 933 | 1.089 | 0.789 | 0.624 | #†  | D1 |
| 1371232_a_at | Vcan    | Versican                                        | 594 | 1.539 | 1.468 | 1.218 | --- | U4 |
| 1388054_a_at | Vcan    | Versican                                        | 674 | 1.579 | 1.515 | 1.212 | --- | U4 |
| 1388142_at   | Vcan    | Versican                                        | 499 | 1.606 | 1.641 | 1.463 | *#† | U4 |
| 1387873_at   | Wfdc1   | WAP four-disulfide core domain 1                | 177 | 1.034 | 1.101 | 1.899 | †   | U5 |
| 1369484_at   | Wisp2   | WNT1 inducible signaling pathway protein 2      | 569 | 0.871 | 0.899 | 1.505 | *#† | U5 |
| 1372791_at   | Wnk1    | WNK lysine deficient protein kinase 1           | 953 | 1.251 | 1.662 | 1.208 | *#† | U6 |
| 1387072_at   | Wnk1    | WNK lysine deficient protein kinase 1           | 460 | 1.399 | 1.684 | 1.245 | *#† | U6 |
| 1377223_at   | Wt1     | Wilms tumor 1                                   | 111 | 1.557 | 1.203 | 1.328 | *†  | U3 |
| 1392670_at   | Wwc2    | WW and C2 domain containing 2                   | 216 | 1.107 | 1.323 | 1.541 | #†  | U5 |
| 1389119_at   | Xirp1   | Xin actin-binding repeat containing 1           | 583 | 2.904 | 2.461 | 1.168 | *#  | U1 |
| 1375846_at   | Xpr1    | Xenotropic and polytropic retrovirus receptor 1 | 555 | 1.312 | 1.412 | 1.580 | *#† | U0 |
| 1385883_at   | Zbtb11  | Zinc finger and BTB domain containing 11        | 123 | 1.363 | 1.608 | 1.256 | *#  | U6 |
| 1386106_at   | Zcchc24 | Zinc finger, CCHC domain containing 24          | 266 | 0.745 | 0.634 | 0.920 | #   | D2 |

## Supplemental Table S5 Changes in transcript expression induced by ET-1 at 2, 4 and 24 h

RNA expression analysis was performed using Affymetrix rat expression 230 2.0 microarrays and GeneSpring 12.0. The raw data for controls are given and results at each time are the mean fold change relative to the controls (n=3). Statistical analysis was performed by one-way ANOVA with SNK post-test using a Benjamini and Hochberg false discovery rate correction (FDR<0.05) \* 2 h vs control; # 4 h vs control; † 24 h vs control

| Probeset ID  | Gene Symbol | Gene Title                                                  | Raw data (control) | 2 h   | 4 h   | 24 h  | Statistical significance |
|--------------|-------------|-------------------------------------------------------------|--------------------|-------|-------|-------|--------------------------|
| 1370561_at   | A3galt2     | Alpha 1,3-galactosyltransferase 2                           | 182                | 1.325 | 1.807 | 1.456 | *#†                      |
| 1369027_at   | A4galt      | Alpha 1,4-galactosyltransferase                             | 204                | 1.083 | 1.736 | 1.112 | #                        |
| 1383355_at   | Abca1       | ATP-binding cassette, sub-family A (ABC1), member 1         | 273                | 0.793 | 0.587 | 0.667 | *#†                      |
| 1394490_at   | Abca1       | ATP-binding cassette, sub-family A (ABC1), member 1         | 101                | 0.658 | 0.490 | 0.672 | *#†                      |
| 1390783_at   | Abca8a      | ATP-binding cassette, sub-family A (ABC1), member 8a        | 172                | 0.816 | 0.706 | 0.494 | #†                       |
| 1379402_at   | Abcc4       | ATP-binding cassette, sub-family C (CFTR/MRP), member 4     | 190                | 0.864 | 0.702 | 0.593 | *#†                      |
| 1398265_at   | Abcc9       | ATP-binding cassette, sub-family C (CFTR/MRP), member 9     | 466                | 0.921 | 0.803 | 0.535 | #†                       |
| 1368103_at   | Abcg1       | ATP-binding cassette, sub-family G (WHITE), member 1        | 342                | 0.648 | 0.706 | 1.177 | *#                       |
| 1390455_at   | Abhd2       | Abhydrolase domain containing 2                             | 219                | 2.092 | 3.092 | 1.471 | *#†                      |
| 1398109_at   | Abhd2       | Abhydrolase domain containing 2                             | 157                | 1.325 | 1.673 | 1.116 | *#                       |
| 1390881_at   | Abra        | Actin-binding Rho activating protein                        | 200                | 2.669 | 1.253 | 0.879 | *                        |
| 1373302_at   | Acer2       | Alkaline ceramidase 2                                       | 122                | 0.577 | 0.723 | 0.952 | *#                       |
| 1391791_at   | Acer2       | Alkaline ceramidase 2                                       | 146                | 0.639 | 0.821 | 0.855 | *                        |
| 1388153_at   | Acsl1       | Acyl-CoA synthetase long-chain family member 1              | 1233               | 0.832 | 0.780 | 0.631 | †                        |
| 1397375_at   | Acsl5       | Acyl-CoA synthetase long-chain family member 5              | 236                | 1.122 | 1.337 | 1.533 | #†                       |
| 1370857_at   | Acta2       | Smooth muscle alpha-actin                                   | 4515               | 1.054 | 1.178 | 2.218 | †                        |
| 1386869_at   | Actg2       | Actin, gamma 2, smooth muscle, enteric                      | 199                | 1.297 | 1.214 | 3.092 | †                        |
| 1389189_at   | Actn1       | Actinin, alpha 1                                            | 2246               | 1.629 | 2.128 | 1.845 | *#†                      |
| 1398294_at   | Actn1       | Actinin, alpha 1                                            | 1392               | 1.687 | 2.387 | 1.813 | *#†                      |
| 1369942_at   | Actn4       | Actinin, alpha 4                                            | 1947               | 1.105 | 1.331 | 1.748 | #†                       |
| 1390931_at   | Adamts15    | ADAM metalloproteinase with thrombospondin type 1 motif, 15 | 406                | 0.488 | 0.618 | 0.760 | *#†                      |
| 1393730_at   | Adamts4     | ADAM metalloproteinase with thrombospondin type 1 motif, 4  | 207                | 1.013 | 0.927 | 0.564 | †                        |
| 1394483_at   | Adamts5     | ADAM metalloproteinase with thrombospondin type 1 motif, 5  | 282                | 0.729 | 0.569 | 1.377 | *#†                      |
| 1379022_at   | Adamts8     | ADAM metalloproteinase with thrombospondin type 1 motif, 8  | 146                | 1.024 | 1.226 | 1.854 | †                        |
| 1391139_at   | Adamts1     | ADAMTS-like 1                                               | 99                 | 1.090 | 1.685 | 0.933 | #                        |
| 1398370_at   | Adarb1      | Adenosine deaminase, RNA-specific, B1                       | 149                | 0.955 | 1.002 | 1.556 | †                        |
| 1399096_at   | Add3        | Adducin 3 (gamma)                                           | 1571               | 0.746 | 0.613 | 0.794 | *#†                      |
| 1390383_at   | Adfp        | Adipose differentiation related protein                     | 2681               | 1.564 | 1.637 | 0.866 | *#                       |
| 1390850_at   | Adfp        | Adipose differentiation related protein                     | 92                 | 1.782 | 1.195 | 1.604 | ---                      |
| 1370584_a_at | Adora1      | Adenosine A1 receptor                                       | 85                 | 0.837 | 0.631 | 0.700 | #†                       |
| 1368300_at   | Adora2a     | Adenosine A2a receptor                                      | 104                | 0.776 | 0.861 | 0.495 | †                        |
| 1387395_at   | Adora2b     | Adenosine A2B receptor                                      | 381                | 0.596 | 0.564 | 0.584 | *#†                      |
| 1368574_at   | Adra1b      | Adrenergic, alpha-1B-, receptor                             | 573                | 0.732 | 0.548 | 0.556 | *#†                      |
| 1369806_at   | Adrb1       | Adrenergic, beta-1-, receptor                               | 142                | 0.612 | 0.685 | 0.890 | *#                       |
| 1383848_at   | Adrb1       | Adrenergic, beta-1-, receptor                               | 349                | 0.455 | 0.575 | 0.918 | *#                       |
| 1382533_at   | Agfg1       | ArfGAP with FG repeats 1                                    | 677                | 1.156 | 1.618 | 1.269 | #†                       |
| 1384022_at   | Agfg1       | ArfGAP with FG repeats 1                                    | 758                | 1.247 | 1.629 | 1.351 | *#†                      |
| 1372736_at   | Agf1        | Amylo-1,6-glucosidase, 4-alpha-glucanotransferase           | 759                | 0.790 | 0.632 | 0.785 | *#                       |
| 1395414_at   | Agf1        | Amylo-1,6-glucosidase, 4-alpha-glucanotransferase           | 143                | 0.703 | 0.596 | 0.838 | *#                       |

|              |          |                                                             |      |       |       |       |     |
|--------------|----------|-------------------------------------------------------------|------|-------|-------|-------|-----|
| 1369291_at   | Agtr1a   | Angiotensin II receptor, type 1a                            | 100  | 0.769 | 0.651 | 1.038 | *#  |
| 1384240_at   | Agtr1a   | Angiotensin II receptor, type 1a                            | 109  | 0.650 | 0.389 | 1.506 | *#† |
| 1369146_a_at | Ahr      | Aryl hydrocarbon receptor                                   | 87   | 1.079 | 1.488 | 1.783 | #†  |
| 1375845_at   | Aig1     | Androgen-induced 1                                          | 492  | 1.083 | 1.325 | 1.642 | #†  |
| 1382206_a_at | Akap2    | A kinase (PRKA) anchor protein 2                            | 274  | 2.134 | 2.048 | 1.229 | *#  |
| 1385566_at   | Akap2    | A kinase (PRKA) anchor protein 2                            | 212  | 2.511 | 2.271 | 1.357 | *#  |
| 1386764_at   | Akap2    | A kinase (PRKA) anchor protein 2                            | 126  | 2.161 | 1.953 | 1.312 | *#  |
| 1392079_at   | Akap7    | A kinase (PRKA) anchor protein 7                            | 134  | 0.828 | 0.832 | 1.805 | †   |
| 1385713_at   | Akap8l   | A kinase (PRKA) anchor protein 8-like                       | 489  | 0.756 | 0.621 | 0.867 | #   |
| 1396933_s_at | Akr1c14  | Aldo-keto reductase family 1, member C14                    | 106  | 0.821 | 0.528 | 0.533 | *#† |
| 1394681_at   | Akr1c1l  | Aldo-keto reductase family 1, member C-like 1               | 741  | 0.801 | 0.576 | 0.607 | *#† |
| 1370043_at   | Alcam    | Activated leukocyte cell adhesion molecule                  | 508  | 1.214 | 1.512 | 1.186 | #   |
| 1368003_at   | Aldh1a2  | Aldehyde dehydrogenase 1 family, member A2                  | 213  | 1.045 | 1.097 | 1.786 | †   |
| 1386998_at   | Aldoc    | Aldolase C, fructose-bisphosphate                           | 1055 | 0.930 | 0.885 | 0.511 | †   |
| 1389546_at   | Amotl2   | Angiomotin like 2                                           | 1044 | 1.468 | 1.547 | 1.647 | *#† |
| 1368342_at   | Ampd3    | Adenosine monophosphate deaminase 3                         | 385  | 0.720 | 0.669 | 0.536 | *#† |
| 1374207_at   | Angpt2   | Angiopoietin 2                                              | 363  | 0.961 | 0.965 | 0.523 | †   |
| 1388924_at   | Angptl4  | Angiopoietin-like 4                                         | 139  | 1.535 | 1.238 | 0.679 | *†  |
| 1389398_at   | Ank1     | Ankyrin 1, erythrocytic                                     | 362  | 0.848 | 0.754 | 0.424 | †   |
| 1372742_at   | Ankmy2   | Ankyrin repeat and MYND domain containing 2                 | 658  | 0.716 | 0.639 | 0.950 | *#  |
| 1371927_at   | Ankrd23  | Ankyrin repeat domain 23                                    | 56   | 1.131 | 1.851 | 1.289 | #   |
| 1398432_at   | Ankrd28  | Ankyrin repeat domain 28                                    | 428  | 1.314 | 1.596 | 1.131 | *#  |
| 1389264_at   | Ankrd54  | Ankyrin repeat domain 54                                    | 186  | 0.580 | 1.016 | 0.987 | *   |
| 1377587_at   | Ankrd60  | Ankyrin repeat domain 60                                    | 75   | 0.989 | 0.962 | 1.560 | †   |
| 1377949_s_at | Anks1a   | Ankyrin repeat and sterile alpha motif domain containing 1A | 261  | 0.584 | 0.643 | 0.894 | *#  |
| 1397634_at   | Anks1a   | Ankyrin repeat and sterile alpha motif domain containing 1A | 200  | 0.477 | 0.561 | 0.759 | *#  |
| 1386938_at   | Anpep    | Alanyl (membrane) aminopeptidase                            | 424  | 0.836 | 0.809 | 0.653 | *#† |
| 1367614_at   | Anxa1    | Annexin A1                                                  | 2459 | 1.863 | 2.039 | 1.210 | *#† |
| 1394451_at   | Anxa1    | Annexin A1                                                  | 186  | 1.432 | 1.513 | 1.064 | *#  |
| 1367974_at   | Anxa3    | Annexin A3                                                  | 132  | 2.278 | 3.561 | 1.024 | *#  |
| 1387376_at   | Aox1     | Aldehyde oxidase 1                                          | 178  | 0.878 | 0.752 | 0.316 | #†  |
| 1397579_x_at | Apc2     | Adenomatosis polyposis coli 2                               | 367  | 0.404 | 0.436 | 0.732 | *#† |
| 1372390_at   | Apeg3    | Antisense paternally expressed gene 3                       | 831  | 0.798 | 0.616 | 0.744 | *#† |
| 1389651_at   | Apln     | Apelin                                                      | 513  | 0.908 | 0.882 | 0.496 | †   |
| 1379772_at   | Aplnr    | Apelin receptor                                             | 131  | 0.828 | 1.015 | 0.588 | *†  |
| 1370862_at   | Apoe     | Apolipoprotein E                                            | 3890 | 0.842 | 0.846 | 0.483 | †   |
| 1387068_at   | Arc      | Activity-regulated cytoskeleton-associated protein          | 79   | 2.125 | 1.133 | 0.871 | *   |
| 1369871_at   | Areg     | Amphiregulin                                                | 22   | 8.274 | 1.748 | 1.115 | *#  |
| 1368946_at   | Arf2     | ADP-ribosylation factor 2                                   | 227  | 1.534 | 1.437 | 1.132 | *#  |
| 1380383_at   | Arf4l    | ADP-ribosylation factor 4-like                              | 143  | 1.584 | 1.164 | 0.911 | *   |
| 1398361_at   | Arhgap10 | Rho GTPase activating protein 10                            | 336  | 1.170 | 1.512 | 1.088 | #   |
| 1391083_at   | Arhgap22 | Rho GTPase activating protein 22                            | 59   | 1.353 | 2.007 | 1.371 | #   |
| 1392590_at   | Arhgap24 | Rho GTPase activating protein 24                            | 276  | 0.786 | 0.660 | 0.872 | #   |
| 1373541_at   | Arhgef17 | Rho guanine nucleotide exchange factor (GEF) 17             | 329  | 1.097 | 1.614 | 1.077 | #   |
| 1377750_at   | Arhgef3  | Rho guanine nucleotide exchange factor (GEF) 3              | 185  | 3.364 | 2.378 | 1.732 | *#† |
| 1379311_at   | Arid5a   | AT rich interactive domain 5A (Mrf1 like)                   | 142  | 1.760 | 1.181 | 1.144 | *   |
| 1397437_at   | Arid5a   | AT rich interactive domain 5A (Mrf1 like)                   | 69   | 1.685 | 1.392 | 1.286 | *#† |
| 1382312_at   | Arid5b   | AT rich interactive domain 5B (Mrf1 like)                   | 140  | 1.630 | 1.237 | 1.230 | *   |
| 1370510_a_at | Arntl    | Aryl hydrocarbon receptor nuclear translocator-like         | 179  | 1.490 | 1.808 | 1.079 | *#  |
| 1369268_at   | Atf3     | Activating transcription factor 3                           | 130  | 3.562 | 1.001 | 0.968 | *   |
| 1377939_at   | Atg4c    | ATG4 autophagy related 4 homolog C (S. cerevisiae)          | 108  | 0.640 | 0.617 | 0.830 | *#  |
| 1373287_at   | Atoh8    | Atonal homolog 8 (Drosophila)                               | 298  | 0.442 | 0.801 | 0.706 | *#† |

|              |                       |                                                                                 |      |       |       |       |     |
|--------------|-----------------------|---------------------------------------------------------------------------------|------|-------|-------|-------|-----|
| 1385361_at   | Atp10a                | ATPase, class V, type 10A                                                       | 96   | 1.291 | 1.436 | 1.643 | *#† |
| 1369798_at   | Atp1b2                | ATPase, Na+/K+ transporting, beta 2 polypeptide                                 | 105  | 0.884 | 0.773 | 0.586 | †   |
| 1379906_at   | Atp1b2                | ATPase, Na+/K+ transporting, beta 2 polypeptide                                 | 445  | 0.931 | 0.799 | 0.467 | #†  |
| 1370050_at   | Atp2b1                | ATPase, Ca++ transporting, plasma membrane 1                                    | 478  | 1.918 | 1.856 | 1.145 | *#† |
| 1386426_at   | Atp2b1                | ATPase, Ca++ transporting, plasma membrane 1                                    | 561  | 1.795 | 1.810 | 1.229 | *#  |
| 1394714_at   | Atp2b1                | ATPase, Ca++ transporting, plasma membrane 1                                    | 91   | 1.859 | 1.217 | 1.021 | *   |
| 1397224_at   | Atp2b1                | ATPase, Ca++ transporting, plasma membrane 1                                    | 73   | 1.664 | 1.537 | 1.084 | *#  |
| 1378134_at   | Atp8b1                | ATPase, Class I, type 8B, member 1                                              | 88   | 3.740 | 2.112 | 1.966 | *#† |
| 1391693_at   | Atp8b1                | ATPase, Class I, type 8B, member 1                                              | 79   | 2.915 | 1.969 | 1.439 | *#† |
| 1390294_at   | Atxn7l4               | Ataxin 7-like 4                                                                 | 206  | 0.967 | 1.084 | 1.539 | †   |
| 1398347_at   | Axl /// LOC687188     | Axl receptor tyrosine kinase /// similar to AXL receptor tyrosine kinase        | 971  | 1.414 | 1.870 | 1.864 | *#† |
| 1389402_at   | Axud1                 | AXIN1 up-regulated 1                                                            | 180  | 4.427 | 2.063 | 1.357 | *#† |
| 1398373_at   | B3galnt1              | Beta-1,3-N-acetylgalactosaminyltransferase 1                                    | 381  | 1.843 | 1.740 | 0.975 | *#  |
| 1371073_at   | B4galt1               | UDP-Gal:betaGlcNAc beta 1,4- galactosyltransferase, polypeptide 1               | 607  | 1.295 | 1.546 | 1.056 | *#  |
| 1389047_at   | Bag2                  | Bcl2-associated athanogene 2                                                    | 625  | 1.374 | 1.651 | 1.579 | *#† |
| 1370074_at   | Baiap2                | BAI1-associated protein 2                                                       | 125  | 1.314 | 1.560 | 0.948 | *#  |
| 1373081_at   | Baiap2                | BAI1-associated protein 2                                                       | 172  | 1.474 | 1.716 | 1.081 | *#  |
| 1370823_at   | Bambi                 | BMP and activin membrane-bound inhibitor, homolog (Xenopus laevis)              | 581  | 0.401 | 0.888 | 1.037 | *   |
| 1374113_at   | Baz1a                 | Bromodomain adjacent to zinc finger domain, 1A                                  | 180  | 1.621 | 1.129 | 1.203 | *   |
| 1377727_at   | Baz1a                 | Bromodomain adjacent to zinc finger domain, 1A                                  | 89   | 1.549 | 1.089 | 1.005 | *   |
| 1367752_at   | Bcar1                 | Breast cancer anti-estrogen resistance 1                                        | 549  | 1.476 | 1.572 | 1.132 | *#† |
| 1369520_a_at | Bcat1                 | Branched chain aminotransferase 1, cytosolic                                    | 505  | 1.144 | 1.665 | 1.561 | #†  |
| 1370869_at   | Bcat1                 | Branched chain aminotransferase 1, cytosolic                                    | 1162 | 1.229 | 1.553 | 1.572 | #†  |
| 1370897_at   | Bckdha                | Branched chain ketoacid dehydrogenase E1, alpha polypeptide                     | 220  | 0.941 | 0.919 | 0.574 | †   |
| 1368118_at   | Bcl10                 | B-cell CLL/lymphoma 10                                                          | 620  | 1.586 | 1.427 | 1.117 | *#† |
| 1385627_at   | Bcl3                  | B-cell CLL/lymphoma 3                                                           | 347  | 0.976 | 0.890 | 0.659 | †   |
| 1398482_at   | Bcl3                  | B-cell CLL/lymphoma 3                                                           | 257  | 0.841 | 0.714 | 0.600 | *#† |
| 1384335_at   | Bcl9l                 | B-cell CLL/lymphoma 9-like                                                      | 678  | 0.536 | 0.715 | 1.015 | *#  |
| 1373494_at   | Bcr                   | Breakpoint cluster region                                                       | 531  | 2.425 | 2.493 | 1.075 | *#  |
| 1370649_at   | Bdkrb2 /// RGD1308470 | Bradykinin receptor B2 /// similar to RIKEN cDNA 4933433P14 gene                | 99   | 1.700 | 1.705 | 1.093 | *#  |
| 1370650_s_at | Bdkrb2 /// RGD1308470 | Bradykinin receptor B2 /// similar to RIKEN cDNA 4933433P14 gene                | 82   | 2.740 | 3.217 | 1.156 | *#  |
| 1371120_s_at | Bdkrb2 /// RGD1308470 | Bradykinin receptor B2 /// similar to RIKEN cDNA 4933433P14 gene                | 58   | 1.582 | 1.888 | 1.170 | *#  |
| 1368677_at   | Bdnf                  | Brain derived neurotrophic factor                                               | 63   | 2.148 | 1.788 | 1.485 | *#† |
| 1377814_at   | Bean                  | Brain expressed, associated with Nedd4                                          | 166  | 1.426 | 2.052 | 1.256 | *#† |
| 1370113_at   | Birc3                 | Baculoviral IAP repeat-containing 3                                             | 149  | 0.938 | 1.016 | 0.643 | †   |
| 1368945_at   | Bmp2                  | Bone morphogenetic protein 2                                                    | 47   | 2.520 | 2.043 | 1.155 | *#  |
| 1398270_at   | Bmp2                  | Bone morphogenetic protein 2                                                    | 154  | 2.841 | 2.555 | 1.349 | *#  |
| 1379659_at   | Bmp2k                 | BMP-2 inducible kinase                                                          | 66   | 1.727 | 1.664 | 1.238 | *#† |
| 1387232_at   | Bmp4                  | Bone morphogenetic protein 4                                                    | 181  | 0.902 | 1.203 | 2.092 | †   |
| 1388920_at   | Bmp6                  | Bone morphogenetic protein 6                                                    | 369  | 0.937 | 0.862 | 1.539 | †   |
| 1389403_at   | Bmp7                  | Bone morphogenetic protein 7                                                    | 285  | 1.146 | 1.644 | 1.177 | #   |
| 1386994_at   | Btg2                  | B-cell translocation gene 2, anti-proliferative                                 | 442  | 2.400 | 1.522 | 1.161 | *#  |
| 1386995_at   | Btg2                  | B-cell translocation gene 2, anti-proliferative                                 | 372  | 3.390 | 2.177 | 1.117 | *#  |
| 1382185_at   | C1qtnf2               | C1q and tumor necrosis factor related protein 2                                 | 153  | 0.584 | 0.610 | 1.381 | *#† |
| 1393632_at   | C1qtnf7               | C1q and tumor necrosis factor related protein 7                                 | 182  | 0.652 | 0.605 | 1.046 | #   |
| 1393632_at   | C1qtnf7               | C1q and tumor necrosis factor related protein 7                                 | 182  | 0.652 | 0.605 | 1.046 | *#  |
| 1368000_at   | C3                    | Complement component 3                                                          | 331  | 0.981 | 1.021 | 0.352 | †   |
| 1370892_at   | C4-2 /// C4b          | Complement component 4, gene 2 /// complement component 4B (Childo blood group) | 698  | 0.948 | 0.872 | 0.326 | †   |

|              |               |                                                            |      |       |       |       |     |
|--------------|---------------|------------------------------------------------------------|------|-------|-------|-------|-----|
| 1384580_at   | C6            | Complement component 6                                     | 101  | 0.986 | 0.912 | 0.476 | †   |
| 1383291_at   | C7 /// Tubb2c | Complement component 7 /// tubulin, beta 2c                | 3051 | 0.893 | 0.874 | 0.496 | †   |
| 1388557_at   | C7 /// Tubb2c | Complement component 7 /// tubulin, beta 2c                | 3204 | 0.877 | 0.818 | 0.539 | †   |
| 1372536_at   | Cabc1         | Chaperone, ABC1 activity of bc1 complex homolog (S. pombe) | 407  | 0.764 | 0.540 | 0.680 | *#† |
| 1376657_at   | Cadm1         | Cell adhesion molecule 1                                   | 69   | 0.944 | 1.003 | 1.940 | †   |
| 1384132_at   | Cadm1         | Cell adhesion molecule 1                                   | 108  | 0.932 | 1.081 | 1.986 | †   |
| 1368824_at   | Cald1         | Caldesmon 1                                                | 450  | 1.360 | 1.557 | 1.958 | #†  |
| 1368131_at   | Capn6         | Calpain 6                                                  | 342  | 0.865 | 0.902 | 0.561 | †   |
| 1367733_at   | Car2          | Carbonic anhydrase II                                      | 139  | 0.938 | 0.837 | 0.631 | †   |
| 1386922_at   | Car2          | Carbonic anhydrase II                                      | 133  | 0.943 | 0.946 | 0.642 | †   |
| 1387605_at   | Casp12        | Caspase 12                                                 | 229  | 1.068 | 0.961 | 1.503 | †   |
| 1388604_at   | Casq1         | Calsequestrin 1 (fast-twitch, skeletal muscle)             | 859  | 0.968 | 0.941 | 1.833 | †   |
| 1370131_at   | Cav1          | Caveolin 1, caveolae protein                               | 638  | 2.093 | 2.865 | 1.521 | *#† |
| 1372111_at   | Cav1          | Caveolin 1, caveolae protein                               | 1511 | 1.798 | 2.063 | 1.415 | *#† |
| 1393281_at   | Cav1          | Caveolin 1, caveolae protein                               | 1273 | 1.899 | 2.317 | 1.504 | *#† |
| 1370135_at   | Cav2          | Caveolin 2                                                 | 60   | 1.341 | 1.572 | 1.041 | *#  |
| 1377642_at   | Cav2          | Caveolin 2                                                 | 100  | 1.656 | 1.618 | 1.192 | *#  |
| 1390101_at   | Ccdc107       | Coiled-coil domain containing 107                          | 650  | 1.001 | 1.046 | 1.740 | †   |
| 1385426_at   | Ccdc109b      | Coiled-coil domain containing 109B                         | 147  | 1.381 | 1.555 | 1.846 | *#† |
| 1367973_at   | Ccl2          | Chemokine (C-C motif) ligand 2                             | 3430 | 1.137 | 1.285 | 0.598 | *#† |
| 1369814_at   | Ccl20         | Chemokine (C-C motif) ligand 20                            | 101  | 1.365 | 1.567 | 1.075 | *#  |
| 1379935_at   | Ccl7          | Chemokine (C-C motif) ligand 7                             | 857  | 1.030 | 1.085 | 0.533 | †   |
| 1371150_at   | Ccnd1         | Cyclin D1                                                  | 392  | 1.067 | 1.576 | 1.224 | #   |
| 1371953_at   | Ccng2         | Cyclin G2                                                  | 418  | 0.486 | 0.534 | 0.751 | *#† |
| 1384268_at   | Ccny1         | Cyclin Y-like 1                                            | 292  | 1.751 | 1.989 | 1.329 | *#† |
| 1377869_at   | Ccrn4l        | CCR4 carbon catabolite repression 4-like (S. cerevisiae)   | 211  | 5.397 | 2.452 | 1.155 | *#  |
| 1387745_at   | Cd200r1       | CD200 receptor 1                                           | 197  | 0.515 | 0.853 | 1.282 | *†  |
| 1374061_at   | Cd302         | CD302 molecule                                             | 641  | 0.843 | 0.682 | 0.570 | †   |
| 1367689_a_at | Cd36          | CD36 molecule (thrombospondin receptor)                    | 1728 | 0.897 | 0.962 | 0.531 | †   |
| 1386901_at   | Cd36          | CD36 molecule (thrombospondin receptor)                    | 2663 | 0.970 | 0.938 | 0.560 | †   |
| 1368975_at   | Cd38          | CD38 molecule                                              | 79   | 0.915 | 1.078 | 1.552 | †   |
| 1376866_at   | Cd3eap        | CD3E antigen, epsilon polypeptide-associated protein       | 115  | 1.822 | 1.899 | 1.321 | *#† |
| 1368921_a_at | Cd44          | Cd44 molecule                                              | 486  | 2.552 | 2.985 | 1.243 | *#† |
| 1387952_a_at | Cd44          | Cd44 molecule                                              | 519  | 2.609 | 3.184 | 1.470 | *#† |
| 1370406_a_at | Cd55          | Cd55 molecule                                              | 48   | 1.733 | 1.791 | 1.354 | *#† |
| 1387951_at   | Cd55          | Cd55 molecule                                              | 45   | 1.518 | 2.031 | 1.177 | *#† |
| 1375910_at   | Cdc42ep3      | CDC42 effector protein (Rho GTPase binding) 3              | 1360 | 1.665 | 1.629 | 1.355 | *#† |
| 1388730_at   | Cdc42ep4      | CDC42 effector protein (Rho GTPase binding) 4              | 459  | 1.512 | 1.113 | 0.876 | *#† |
| 1388530_at   | Cdc42se1      | CDC42 small effector 1                                     | 505  | 1.506 | 1.613 | 0.955 | *#  |
| 1389255_at   | Cdh5          | Cadherin 5                                                 | 795  | 0.969 | 0.997 | 0.643 | †   |
| 1373812_at   | Cdkn1b        | Cyclin-dependent kinase inhibitor 1B                       | 1153 | 0.661 | 0.702 | 0.989 | *#  |
| 1372299_at   | Cdkn1c        | Cyclin-dependent kinase inhibitor 1C (P57)                 | 324  | 0.975 | 0.939 | 0.637 | †   |
| 1369193_at   | Cdkn2b        | Cyclin-dependent kinase inhibitor 2B (p15, inhibits CDK4)  | 154  | 1.142 | 1.715 | 1.155 | #   |
| 1372685_at   | Cdkn3         | Cyclin-dependent kinase inhibitor 3                        | 364  | 1.011 | 0.957 | 1.536 | †   |
| 1374139_at   | Cdr2          | Cerebellar degeneration-related 2                          | 312  | 1.920 | 1.775 | 1.400 | *#† |
| 1368480_at   | Cdw92         | CDW92 antigen                                              | 600  | 0.950 | 0.912 | 0.612 | †   |
| 1373054_at   | Cdw92         | CDW92 antigen                                              | 1334 | 1.052 | 1.017 | 0.596 | †   |
| 1375950_a_at | Cep164        | Centrosomal protein 164kDa                                 | 210  | 0.774 | 0.643 | 0.995 | *#  |
| 1377829_at   | Cep57         | Centrosomal protein 57kDa                                  | 139  | 0.532 | 0.634 | 1.186 | *#  |
| 1389470_at   | Cfb           | Complement factor B                                        | 102  | 0.920 | 0.955 | 0.613 | †   |
| 1392171_at   | Chi3l1        | Chitinase 3-like 1                                         | 422  | 0.875 | 0.747 | 0.328 | †   |
| 1386615_at   | Chst2         | Carbohydrate sulfotransferase 2                            | 175  | 1.129 | 1.551 | 1.484 | #†  |

|              |            |                                                                                   |      |       |       |       |     |
|--------------|------------|-----------------------------------------------------------------------------------|------|-------|-------|-------|-----|
| 1389179_at   | Cidea      | Cell death-inducing DNA fragmentation factor, alpha subunit-like effector A       | 1765 | 0.886 | 0.862 | 0.632 | †   |
| 1367601_at   | Cited2     | Cbp/p300-interacting transactivator, with Glu/Asp-rich carboxy-terminal domain, 2 | 560  | 2.895 | 2.357 | 1.852 | *#† |
| 1367602_at   | Cited2     | Cbp/p300-interacting transactivator, with Glu/Asp-rich carboxy-terminal domain, 2 | 816  | 2.562 | 2.123 | 1.781 | *#† |
| 1370225_at   | Cited4     | Cbp/p300-interacting transactivator, with Glu/Asp-rich carboxy-terminal domain, 4 | 545  | 0.489 | 0.515 | 0.759 | *#† |
| 1395342_at   | Ckap4      | Cytoskeleton-associated protein 4                                                 | 325  | 1.013 | 1.337 | 1.514 | #†  |
| 1367626_at   | Ckm        | Creatine kinase, muscle                                                           | 2579 | 0.916 | 0.909 | 0.500 | †   |
| 1373823_at   | Cks2       | CDC28 protein kinase regulatory subunit 2                                         | 403  | 0.905 | 0.914 | 1.583 | †   |
| 1374104_at   | Cldn5      | Claudin 5                                                                         | 161  | 0.910 | 0.910 | 0.489 | †   |
| 1389368_at   | Cnksr3     | Cnksr family member 3                                                             | 446  | 1.698 | 1.353 | 1.300 | *#† |
| 1367785_at   | Cnn1       | Calponin 1, basic, smooth muscle                                                  | 423  | 1.263 | 1.218 | 2.083 | †   |
| 1393619_at   | Cnot6l     | CCR4-NOT transcription complex, subunit 6-like                                    | 108  | 1.674 | 1.255 | 1.338 | *   |
| 1387897_at   | Cnp        | 2',3'-cyclic nucleotide 3' phosphodiesterase                                      | 551  | 0.771 | 0.655 | 1.155 | *#† |
| 1370185_at   | Cntnap1    | Contactin associated protein 1                                                    | 189  | 0.884 | 0.798 | 0.626 | †   |
| 1377254_a_at | Cohh1      | Cohen syndrome homolog 1                                                          | 88   | 0.917 | 0.630 | 1.092 | #   |
| 1392915_at   | Col11a1    | Collagen, type XI, alpha 1                                                        | 75   | 1.037 | 0.897 | 1.771 | †   |
| 1370927_at   | Col12a1    | Collagen, type XII, alpha 1                                                       | 379  | 1.268 | 1.304 | 3.138 | †   |
| 1395580_at   | Col12a1    | Collagen, type XII, alpha 1                                                       | 116  | 1.156 | 1.356 | 2.308 | †   |
| 1398321_a_at | Col12a1    | Collagen, type XII, alpha 1                                                       | 179  | 1.262 | 1.352 | 2.868 | †   |
| 1368347_at   | Col5a3     | Collagen, type V, alpha 3                                                         | 557  | 1.157 | 1.501 | 1.064 | *#  |
| 1393891_at   | Col8a1     | Collagen, type VIII, alpha 1                                                      | 277  | 1.232 | 1.225 | 3.162 | †   |
| 1373866_at   | Coq10b     | Coenzyme Q10 homolog B (S. cerevisiae)                                            | 466  | 1.772 | 1.537 | 1.439 | *#† |
| 1396250_at   | Coro1c     | Coronin, actin binding protein 1C                                                 | 116  | 1.107 | 1.061 | 1.772 | †   |
| 1372223_at   | Cpeb4      | Cytoplasmic polyadenylation element binding protein 4                             | 681  | 1.535 | 1.306 | 1.246 | *   |
| 1393294_at   | Cpeb4      | Cytoplasmic polyadenylation element binding protein 4                             | 359  | 1.544 | 1.414 | 0.966 | *#  |
| 1374474_at   | Cpne8      | Copine VIII                                                                       | 809  | 0.769 | 0.634 | 0.770 | *#† |
| 1386946_at   | Cpt1a      | Carnitine palmitoyltransferase 1a, liver                                          | 587  | 0.718 | 0.600 | 0.866 | *#  |
| 1367742_at   | Cpt1b      | Carnitine palmitoyltransferase 1b, muscle                                         | 1369 | 0.919 | 0.867 | 0.539 | †   |
| 1390420_at   | Cpxm1      | Carboxypeptidase X (M14 family), member 1                                         | 845  | 0.828 | 0.826 | 0.288 | †   |
| 1375428_at   | Creg1      | Cellular repressor of E1A-stimulated genes 1                                      | 143  | 0.830 | 0.790 | 0.638 | *#† |
| 1382037_at   | Crim1      | Cysteine rich transmembrane BMP regulator 1 (chordin like)                        | 201  | 1.502 | 1.561 | 1.782 | *#† |
| 1391448_at   | Crim1      | Cysteine rich transmembrane BMP regulator 1 (chordin like)                        | 399  | 1.593 | 1.632 | 1.509 | *#† |
| 1398622_at   | Crim1      | Cysteine rich transmembrane BMP regulator 1 (chordin like)                        | 1113 | 1.381 | 1.379 | 1.706 | *#† |
| 1376799_a_at | Crlf1      | Cytokine receptor-like factor 1                                                   | 227  | 1.108 | 1.365 | 3.374 | #†  |
| 1395512_at   | Crlf1      | Cytokine receptor-like factor 1                                                   | 164  | 1.002 | 1.309 | 3.493 | #†  |
| 1368426_at   | Crot       | Carnitine O-octanoyltransferase                                                   | 334  | 0.729 | 0.567 | 0.957 | *#  |
| 1368059_at   | Crym       | Crystallin, mu                                                                    | 278  | 1.010 | 1.100 | 1.526 | †   |
| 1383590_at   | Csgalnact1 | Chondroitin sulfate N-acetylgalactosaminyltransferase 1                           | 112  | 1.406 | 1.515 | 0.865 | *#† |
| 1373184_at   | Csgalnact2 | Chondroitin sulfate N-acetylgalactosaminyltransferase 2                           | 360  | 1.169 | 1.188 | 1.540 | *#† |
| 1368685_at   | Cspg4      | Chondroitin sulfate proteoglycan 4                                                | 255  | 1.706 | 2.571 | 1.632 | *#† |
| 1368704_a_at | Cspg5      | Chondroitin sulfate proteoglycan 5                                                | 110  | 0.875 | 0.976 | 0.652 | †   |
| 1384162_at   | Csrp2      | Cysteine-serine-rich nuclear protein 2                                            | 125  | 1.801 | 1.221 | 1.047 | *   |
| 1398243_at   | Csrp3      | Cysteine and glycine-rich protein 3                                               | 6383 | 1.404 | 1.510 | 1.203 | --- |
| 1367631_at   | Ctgf       | Connective tissue growth factor                                                   | 4345 | 1.980 | 1.918 | 2.394 | *#† |
| 1367838_at   | Cth        | Cystathionase (cystathionine gamma-lyase)                                         | 67   | 1.066 | 0.873 | 2.209 | †   |
| 1384063_at   | Cthrc1     | Collagen triple helix repeat containing 1                                         | 1802 | 1.005 | 1.181 | 1.593 | †   |
| 1398354_at   | Ctnnal1    | Catenin (cadherin associated protein), alpha-like 1                               | 138  | 1.585 | 1.755 | 0.825 | *#† |
| 1368280_at   | Ctsc       | Cathepsin C                                                                       | 1104 | 0.873 | 0.785 | 0.536 | #†  |
| 1374778_at   | Ctsc       | Cathepsin C                                                                       | 925  | 0.916 | 0.771 | 0.598 | #†  |
| 1379450_at   | Cttnbp2nl  | CTTNBP2 N-terminal like                                                           | 499  | 1.561 | 1.385 | 1.158 | *#† |
| 1382873_at   | Cttnbp2nl  | CTTNBP2 N-terminal like                                                           | 229  | 1.482 | 1.521 | 1.188 | *#† |
| 1387316_at   | Cxcl1      | Chemokine (C-X-C motif) ligand 1 (melanoma growth stimulating activity, alpha)    | 1897 | 0.421 | 0.460 | 0.413 | *#† |
| 1379365_at   | Cxcl11     | Chemokine (C-X-C motif) ligand 11                                                 | 519  | 0.885 | 0.884 | 0.422 | †   |



|              |        |                                                                      |      |       |       |       |     |
|--------------|--------|----------------------------------------------------------------------|------|-------|-------|-------|-----|
| 1388583_at   | Cxcl12 | Chemokine (C-X-C motif) ligand 12 (stromal cell-derived factor 1)    | 789  | 0.725 | 0.621 | 0.769 | *#† |
| 1387648_at   | Cxcl6  | Chemokine (C-X-C motif) ligand 6 (granulocyte chemotactic protein 2) | 612  | 0.764 | 0.394 | 0.223 | #†  |
| 1370097_a_at | Cxcr4  | Chemokine (C-X-C motif) receptor 4                                   | 514  | 0.839 | 0.933 | 0.469 | †   |
| 1373661_a_at | Cxcr4  | Chemokine (C-X-C motif) receptor 4                                   | 523  | 0.861 | 0.950 | 0.548 | †   |
| 1389244_x_at | Cxcr4  | Chemokine (C-X-C motif) receptor 4                                   | 652  | 0.868 | 0.938 | 0.570 | †   |
| 1367940_at   | Cxcr7  | Chemokine (C-X-C motif) receptor 7                                   | 399  | 0.591 | 0.813 | 0.943 | *   |
| 1398383_at   | Cyb561 | Cytochrome b-561                                                     | 265  | 0.988 | 0.859 | 0.647 | †   |
| 1377738_a_at | Cyhr1  | Cysteine and histidine rich 1                                        | 201  | 0.679 | 0.486 | 0.827 | *#† |
| 1379287_at   | Cyld   | Cylindromatosis (turban tumor syndrome)                              | 171  | 1.316 | 1.659 | 1.134 | *#  |
| 1392958_at   | Cyld   | Cylindromatosis (turban tumor syndrome)                              | 173  | 1.457 | 1.626 | 1.179 | *#† |
| 1398710_at   | Cyp2u1 | Cytochrome P450, family 2, subfamily u, polypeptide 1                | 322  | 0.578 | 0.774 | 0.812 | *#† |
| 1368290_at   | Cyr61  | Cysteine-rich, angiogenic inducer, 61                                | 67   | 2.985 | 2.332 | 3.113 | *#† |
| 1387513_at   | Cyth3  | Cytohesin 3                                                          | 151  | 1.125 | 2.013 | 1.243 | #   |
| 1388712_at   | Cyth3  | Cytohesin 3                                                          | 602  | 1.142 | 1.797 | 1.389 | #†  |
| 1368202_a_at | Dab2   | Disabled homolog 2, mitogen-responsive phosphoprotein (Drosophila)   | 1815 | 1.471 | 1.524 | 0.990 | *#  |
| 1383205_at   | Dact2  | Dapper, antagonist of beta-catenin, homolog 2 (Xenopus laevis)       | 115  | 2.467 | 2.673 | 1.128 | *#  |
| 1376788_at   | Dapk1  | Death associated protein kinase 1                                    | 876  | 0.464 | 0.437 | 0.383 | *#† |
| 1379911_at   | Dapk1  | Death associated protein kinase 1                                    | 384  | 0.556 | 0.501 | 0.446 | *#† |
| 1387874_at   | Dbp    | D site of albumin promoter (albumin D-box) binding protein           | 255  | 0.591 | 0.513 | 0.662 | *#† |
| 1387111_at   | Ddah1  | Dimethylarginine dimethylaminohydrolase 1                            | 1535 | 1.075 | 1.312 | 1.859 | #†  |
| 1369590_a_at | Ddit3  | DNA-damage inducible transcript 3                                    | 752  | 0.666 | 0.721 | 1.081 | *#  |
| 1368025_at   | Ddit4  | DNA-damage-inducible transcript 4                                    | 1147 | 0.315 | 0.498 | 0.871 | *#  |
| 1367793_at   | Ddt    | D-dopachrome tautomerase                                             | 1676 | 0.894 | 0.829 | 0.630 | †   |
| 1371615_at   | Dgat2  | Diacylglycerol O-acyltransferase homolog 2 (mouse)                   | 343  | 1.002 | 0.792 | 0.653 | #†  |
| 1373240_at   | Dhrs3  | Dehydrogenase/reductase (SDR family) member 3                        | 306  | 0.650 | 0.629 | 1.144 | *#† |
| 1389079_at   | Dhrs7c | Dehydrogenase/reductase (SDR family) member 7C                       | 90   | 0.922 | 1.038 | 0.620 | †   |
| 1390172_at   | Dhtkd1 | Dehydrogenase E1 and transketolase domain containing 1               | 157  | 0.837 | 0.635 | 0.771 | #   |
| 1368944_at   | Dlg1   | Discs, large homolog 1 (Drosophila)                                  | 223  | 1.286 | 1.514 | 1.024 | #   |
| 1388816_at   | Dlg1   | Discs, large homolog 1 (Drosophila)                                  | 614  | 1.215 | 1.508 | 1.071 | #   |
| 1372144_at   | Dnajb5 | DnaJ (Hsp40) homolog, subfamily B, member 5                          | 339  | 1.509 | 1.484 | 1.138 | *#  |
| 1375762_at   | Dnajb5 | DnaJ (Hsp40) homolog, subfamily B, member 5                          | 139  | 1.350 | 1.555 | 1.067 | --- |
| 1377835_at   | Dock8  | Dedicator of cytokinesis 8                                           | 208  | 0.947 | 0.995 | 1.591 | †   |
| 1388589_at   | Dot1l  | DOT1-like, histone H3 methyltransferase (S. cerevisiae)              | 289  | 3.343 | 2.614 | 1.040 | *#  |
| 1395910_at   | Dot1l  | DOT1-like, histone H3 methyltransferase (S. cerevisiae)              | 40   | 1.490 | 1.688 | 1.066 | *#  |
| 1371732_at   | Dpt    | Dermatopontin                                                        | 2034 | 0.916 | 0.871 | 0.592 | †   |
| 1373947_at   | Dpt    | Dermatopontin                                                        | 1833 | 0.838 | 0.956 | 0.611 | †   |
| 1380964_at   | Dtna   | Dystrobrevin alpha                                                   | 90   | 0.934 | 0.830 | 1.566 | #†  |
| 1376612_at   | Dtwd1  | DTW domain containing 1                                              | 135  | 0.524 | 0.822 | 1.085 | *#  |
| 1374718_at   | Dtx3l  | Deltex 3-like (Drosophila)                                           | 135  | 0.703 | 0.588 | 0.786 | #   |
| 1368146_at   | Dusp1  | Dual specificity phosphatase 1                                       | 648  | 1.891 | 1.791 | 1.507 | *#† |
| 1368147_at   | Dusp1  | Dual specificity phosphatase 1                                       | 93   | 2.135 | 2.087 | 1.308 | *#  |
| 1394028_at   | Dusp10 | Dual specificity phosphatase 10                                      | 76   | 2.662 | 1.908 | 1.003 | *#  |
| 1373324_at   | Dusp14 | Dual specificity phosphatase 14                                      | 203  | 2.036 | 2.033 | 1.523 | *#† |
| 1377023_at   | Dusp2  | Dual specificity phosphatase 2                                       | 181  | 2.980 | 1.680 | 0.976 | *#  |
| 1368124_at   | Dusp5  | Dual specificity phosphatase 5                                       | 343  | 2.737 | 1.032 | 1.100 | *   |
| 1377064_at   | Dusp6  | Dual specificity phosphatase 6                                       | 442  | 1.927 | 2.154 | 1.687 | *#† |
| 1382778_at   | Dusp6  | Dual specificity phosphatase 6                                       | 277  | 1.894 | 2.098 | 1.362 | *   |
| 1387024_at   | Dusp6  | Dual specificity phosphatase 6                                       | 744  | 1.902 | 2.164 | 1.343 | *#† |
| 1389712_at   | Ebf3   | Early B-cell factor 3                                                | 207  | 0.523 | 0.912 | 1.068 | *   |
| 1383747_at   | Ect2   | Epithelial cell transforming sequence 2 oncogene                     | 120  | 1.020 | 0.795 | 1.536 | †   |
| 1369511_at   | Ednra  | Endothelin receptor type A                                           | 418  | 0.630 | 0.595 | 0.632 | *#† |
| 1378342_at   | Ednra  | Endothelin receptor type A                                           | 401  | 0.588 | 0.467 | 0.617 | *#† |

|              |                        |                                                                                                                |      |       |       |       |     |
|--------------|------------------------|----------------------------------------------------------------------------------------------------------------|------|-------|-------|-------|-----|
| 1383641_at   | Ednra                  | Endothelin receptor type A                                                                                     | 586  | 0.497 | 0.441 | 0.604 | *#† |
| 1393415_at   | Ednra                  | Endothelin receptor type A                                                                                     | 720  | 0.585 | 0.519 | 0.705 | *#† |
| 1387146_a_at | Ednrb                  | Endothelin receptor type B                                                                                     | 103  | 1.282 | 1.255 | 1.701 | †   |
| 1390112_at   | Efemp1                 | EGF-containing fibulin-like extracellular matrix protein 1                                                     | 285  | 0.898 | 0.874 | 0.192 | †   |
| 1374388_at   | Efhd2                  | EF-hand domain family, member D2                                                                               | 715  | 1.622 | 2.271 | 1.201 | *#  |
| 1372844_at   | Efna1                  | Ephrin A1                                                                                                      | 112  | 2.606 | 1.141 | 0.769 | *†  |
| 1398273_at   | Efna1                  | Ephrin A1                                                                                                      | 113  | 2.385 | 1.137 | 0.764 | *†  |
| 1383078_at   | Efnb3                  | Ephrin B3                                                                                                      | 757  | 0.876 | 0.804 | 0.530 | #†  |
| 1387306_a_at | Egr2                   | Early growth response 2                                                                                        | 132  | 1.853 | 2.317 | 1.429 | *#† |
| 1398266_a_at | Egr2                   | Early growth response 2                                                                                        | 64   | 1.347 | 1.603 | 1.151 | *#  |
| 1368967_at   | Eif2b3                 | Eukaryotic translation initiation factor 2B, subunit 3 gamma                                                   | 314  | 1.124 | 1.313 | 1.524 | #†  |
| 1368866_at   | Eif2c2                 | Eukaryotic translation initiation factor 2C, 2                                                                 | 195  | 1.356 | 1.519 | 0.989 | *#  |
| 1368867_at   | Eif2c2                 | Eukaryotic translation initiation factor 2C, 2                                                                 | 183  | 1.405 | 1.706 | 0.963 | *#  |
| 1383867_at   | Eif5a2                 | Eukaryotic translation initiation factor 5A2                                                                   | 169  | 1.020 | 1.172 | 1.516 | †   |
| 1389680_at   | Ell2                   | Elongation factor RNA polymerase II 2                                                                          | 183  | 1.915 | 1.433 | 1.223 | *#† |
| 1372587_at   | Emcn                   | Endomucin                                                                                                      | 477  | 0.951 | 0.980 | 0.406 | †   |
| 1369736_at   | Emp1                   | Epithelial membrane protein 1                                                                                  | 1160 | 2.182 | 2.729 | 1.494 | *#† |
| 1371527_at   | Emp1                   | Epithelial membrane protein 1                                                                                  | 2394 | 1.771 | 1.843 | 1.605 | *#† |
| 1373535_at   | Enah                   | Enabled homolog (Drosophila)                                                                                   | 1080 | 1.519 | 1.890 | 1.518 | --- |
| 1396450_at   | Enah                   | Enabled homolog (Drosophila)                                                                                   | 301  | 1.479 | 1.837 | 1.308 | --- |
| 1370047_at   | Enpp1                  | Ectonucleotide pyrophosphatase/phosphodiesterase 1                                                             | 706  | 1.192 | 1.344 | 2.410 | --- |
| 1370047_at   | Enpp1                  | Ectonucleotide pyrophosphatase/phosphodiesterase 1                                                             | 706  | 1.192 | 1.344 | 2.410 | #†  |
| 1370047_at   | Enpp1                  | Ectonucleotide pyrophosphatase/phosphodiesterase 1                                                             | 706  | 1.192 | 1.344 | 2.410 | †   |
| 1368536_at   | Enpp2                  | Ectonucleotide pyrophosphatase/phosphodiesterase 2                                                             | 135  | 1.001 | 0.921 | 0.478 | †   |
| 1370845_at   | Entpd2                 | Ectonucleoside triphosphate diphosphohydrolase 2                                                               | 118  | 0.990 | 0.960 | 0.666 | †   |
| 1374143_at   | Epha2                  | Eph receptor A2                                                                                                | 130  | 4.311 | 2.530 | 1.417 | *#† |
| 1375729_at   | Epha4                  | Eph receptor A4                                                                                                | 84   | 0.641 | 0.698 | 0.604 | *#† |
| 1390638_at   | Epha4                  | Eph receptor A4                                                                                                | 101  | 0.455 | 0.462 | 0.632 | *#† |
| 1382317_at   | Eps8                   | Epidermal growth factor receptor pathway substrate 8                                                           | 178  | 1.651 | 1.954 | 1.261 | *#† |
| 1383213_at   | Eps8                   | Epidermal growth factor receptor pathway substrate 8                                                           | 221  | 1.681 | 1.965 | 1.212 | *#  |
| 1387813_at   | ErbB2                  | v-erb-b2 erythroblastic leukemia viral oncogene homolog 2, neuro/glioblastoma derived oncogene homolog (avian) | 187  | 1.322 | 1.637 | 1.015 | *#  |
| 1373093_at   | Errfi1                 | ERBB receptor feedback inhibitor 1                                                                             | 739  | 2.312 | 1.683 | 0.935 | *#  |
| 1368851_at   | Ets1                   | v-ets erythroblastosis virus E26 oncogene homolog 1 (avian)                                                    | 712  | 2.200 | 1.596 | 1.314 | *#† |
| 1388342_at   | Etv3                   | Ets variant 3                                                                                                  | 283  | 1.577 | 1.183 | 1.239 | *#† |
| 1386739_at   | Etv4                   | Ets variant 4                                                                                                  | 63   | 1.020 | 1.114 | 1.526 | †   |
| 1373393_at   | Ext1                   | Exostoses (multiple) 1                                                                                         | 1059 | 1.408 | 1.657 | 1.311 | *#† |
| 1373290_at   | Ezh2                   | Enhancer of zeste homolog 2 (Drosophila)                                                                       | 107  | 0.809 | 0.654 | 1.078 | *#  |
| 1367899_at   | F2r                    | Coagulation factor II (thrombin) receptor                                                                      | 1169 | 1.184 | 1.282 | 2.256 | *#† |
| 1387596_at   | F2r1                   | Coagulation factor II (thrombin) receptor-like 1                                                               | 109  | 1.738 | 1.760 | 1.170 | *#  |
| 1369182_at   | F3                     | Coagulation factor III (thromboplastin, tissue factor)                                                         | 119  | 1.198 | 0.993 | 1.673 | †   |
| 1368271_a_at | Fabp4                  | Fatty acid binding protein 4, adipocyte                                                                        | 250  | 0.977 | 0.917 | 0.311 | †   |
| 1367857_at   | Fads1                  | Fatty acid desaturase 1                                                                                        | 2063 | 0.798 | 0.655 | 1.143 | *#† |
| 1377938_at   | Fam100a                | Family with sequence similarity 100, member A                                                                  | 337  | 1.567 | 1.352 | 1.024 | *#  |
| 1379356_at   | Fam102b                | Family with sequence similarity 102, member B                                                                  | 299  | 1.711 | 1.454 | 1.457 | *#† |
| 1380696_at   | Fam102b                | Family with sequence similarity 102, member B                                                                  | 151  | 1.864 | 1.701 | 1.118 | *#  |
| 1385251_at   | Fam110c                | Family with sequence similarity 110, member C                                                                  | 29   | 3.335 | 2.230 | 1.213 | *#† |
| 1371970_at   | Fam111a                | Family with sequence similarity 111, member A                                                                  | 130  | 0.788 | 0.651 | 1.182 | *#  |
| 1388482_at   | Fam129b                | Family with sequence similarity 129, member B                                                                  | 1475 | 1.435 | 1.754 | 1.283 | *#† |
| 1379625_at   | Fam164a                | Family with sequence similarity 164, member A                                                                  | 56   | 0.955 | 0.900 | 1.559 | †   |
| 1391944_at   | Fam184a /// RGD1560557 | Family with sequence similarity 184, member A /// similar to minichromosome maintenance protein 8 isoform 1    | 87   | 1.465 | 2.628 | 1.225 | *#† |

|              |                |                                                                             |      |       |       |       |     |
|--------------|----------------|-----------------------------------------------------------------------------|------|-------|-------|-------|-----|
| 1389695_at   | Fam20c         | Fmily with sequence similarity 20, member C                                 | 429  | 1.162 | 1.608 | 1.417 | #†  |
| 1391780_at   | Fam46b         | fFmily with sequence similarity 46, member B                                | 104  | 1.146 | 1.565 | 1.115 | #   |
| 1382629_at   | Far1           | fFtty acyl CoA reductase 1                                                  | 201  | 1.322 | 1.528 | 1.143 | *#  |
| 1382143_at   | Farp1          | FERM, RhoGEF (Arhgef) and pleckstrin domain protein 1 (chondrocyte-derived) | 434  | 0.964 | 1.257 | 1.599 | #†  |
| 1367654_at   | Fat1           | FAT tumor suppressor homolog 1 (Drosophila)                                 | 1159 | 0.941 | 0.969 | 1.535 | †   |
| 1372518_at   | Fbln1          | Fibulin 1                                                                   | 1197 | 0.844 | 0.833 | 0.595 | †   |
| 1389533_at   | Fbln2          | Fibulin 2                                                                   | 1009 | 0.951 | 1.026 | 2.044 | †   |
| 1387351_at   | Fbn1           | Fibrillin 1                                                                 | 1310 | 0.884 | 0.870 | 1.530 | †   |
| 1369972_at   | Fbxo21         | F-box protein 21                                                            | 196  | 0.720 | 0.657 | 1.082 | *#  |
| 1368336_at   | Fdx1           | Ferredoxin 1                                                                | 1202 | 1.664 | 1.493 | 1.090 | *   |
| 1384182_at   | Fermt2         | Fermitin family homolog 2 (Drosophila)                                      | 272  | 1.235 | 1.565 | 1.122 | #   |
| 1370623_at   | Fgl2           | Fibrinogen-like 2                                                           | 382  | 2.201 | 2.370 | 1.186 | *#† |
| 1383516_at   | Fgl2           | Fibrinogen-like 2                                                           | 126  | 2.889 | 2.753 | 1.290 | *#  |
| 1386637_at   | Fgl2           | Fibrinogen-like 2                                                           | 212  | 2.550 | 2.740 | 1.135 | *#  |
| 1392894_at   | Fgl2           | Fibrinogen-like 2                                                           | 581  | 2.278 | 2.540 | 1.352 | *#† |
| 1390049_at   | Fhl1           | Four and a half LIM domains 1                                               | 2588 | 1.299 | 1.729 | 1.573 | --- |
| 1394750_at   | Fhl1           | Four and a half LIM domains 1                                               | 48   | 2.019 | 2.471 | 1.141 | *#  |
| 1373727_at   | Fibin          | Fin bud initiation factor homolog (zebrafish)                               | 452  | 0.898 | 1.304 | 2.243 | †   |
| 1393696_at   | Fibin          | Fin bud initiation factor homolog (zebrafish)                               | 170  | 0.816 | 1.254 | 2.669 | †   |
| 1373882_at   | Figf           | c-fos induced growth factor                                                 | 1084 | 0.837 | 0.609 | 1.075 | *#  |
| 1389449_at   | Fit1           | Fat-inducing transcript 1                                                   | 312  | 0.903 | 0.816 | 0.599 | †   |
| 1380611_at   | Fkbp5          | FK506 binding protein 5                                                     | 117  | 1.296 | 1.540 | 1.022 | *#  |
| 1388901_at   | Fkbp5          | FK506 binding protein 5                                                     | 111  | 1.115 | 1.550 | 1.031 | #   |
| 1372526_at   | Ficn           | Folliculin                                                                  | 1383 | 0.530 | 0.770 | 0.850 | *#† |
| 1371382_at   | Fina           | Filamin, alpha                                                              | 2260 | 1.183 | 1.233 | 1.711 | †   |
| 1388401_at   | Flnb           | Filamin, beta                                                               | 376  | 1.285 | 1.579 | 1.488 | *#† |
| 1391827_at   | Flnb           | Filamin, beta                                                               | 261  | 1.177 | 1.539 | 1.389 | *#† |
| 1388496_at   | Finc           | Filamin C, gamma (actin binding protein 280)                                | 785  | 1.985 | 1.917 | 1.113 | *#  |
| 1396085_at   | Finc           | Filamin C, gamma (actin binding protein 280)                                | 887  | 1.706 | 1.828 | 1.082 | *#  |
| 1378057_at   | Firt3          | Fibronectin leucine rich transmembrane protein 3                            | 86   | 0.907 | 0.756 | 0.637 | #†  |
| 1370492_a_at | Flt1           | Fms-related tyrosine kinase 1                                               | 76   | 1.265 | 1.703 | 1.300 | #   |
| 1369216_a_at | Flt4           | Fms-related tyrosine kinase 4                                               | 103  | 0.925 | 1.113 | 1.692 | †   |
| 1395404_at   | Fn3krp         | Fructosamine-3-kinase-related protein                                       | 125  | 0.789 | 0.561 | 0.902 | --- |
| 1387530_a_at | Fosb /// Fosl2 | FBJ osteosarcoma oncogene B /// fos-like antigen 2                          | 141  | 1.584 | 0.981 | 0.867 | *   |
| 1368489_at   | Fosl1          | Fos-like antigen 1                                                          | 89   | 6.631 | 2.842 | 1.306 | *#  |
| 1383860_at   | Fosl2          | Fos-like antigen 2                                                          | 109  | 2.113 | 1.061 | 1.011 | *   |
| 1370795_at   | Foxc2          | Forkhead box C2                                                             | 41   | 1.545 | 1.612 | 1.340 | *#† |
| 1375607_at   | Foxc2          | Forkhead box C2                                                             | 88   | 1.599 | 1.536 | 1.333 | *#† |
| 1376779_at   | Foxo1          | Forkhead box O1                                                             | 66   | 1.024 | 0.975 | 0.659 | †   |
| 1379651_at   | Foxp1          | Forkhead box P1                                                             | 364  | 1.276 | 1.523 | 1.758 | *#† |
| 1380387_at   | Foxp2          | Forkhead box P2                                                             | 68   | 0.900 | 0.586 | 1.010 | #   |
| 1389404_at   | Foxs1          | Forkhead box S1                                                             | 144  | 1.564 | 1.700 | 1.448 | *#† |
| 1376753_at   | Fpgt           | Fucose-1-phosphate guanylyltransferase                                      | 64   | 0.615 | 0.995 | 1.077 | *   |
| 1387843_at   | Fst            | Follistatin                                                                 | 90   | 5.246 | 3.875 | 3.498 | *#† |
| 1368821_at   | Fstl1          | Follistatin-like 1                                                          | 1888 | 0.913 | 1.037 | 1.627 | †   |
| 1368822_at   | Fstl1          | Follistatin-like 1                                                          | 2792 | 0.994 | 1.044 | 1.651 | †   |
| 1371331_at   | Fstl1          | Follistatin-like 1                                                          | 3049 | 0.969 | 1.030 | 1.554 | †   |
| 1370120_at   | Fstl3          | Follistatin-like 3 (secreted glycoprotein)                                  | 122  | 1.328 | 1.927 | 2.121 | #†  |
| 1379440_at   | Fstl3          | Follistatin-like 3 (secreted glycoprotein)                                  | 433  | 1.243 | 1.679 | 2.191 | #†  |
| 1368207_at   | Fxyd5          | FXYP domain-containing ion transport regulator 5                            | 807  | 1.151 | 1.526 | 2.214 | *#† |
| 1370256_at   | Fzd1           | Frizzled homolog 1 (Drosophila)                                             | 2560 | 0.513 | 0.728 | 1.001 | *#  |
| 1398304_at   | Fzd2           | Frizzled homolog 2 (Drosophila)                                             | 695  | 0.890 | 1.539 | 1.406 | #†  |

|              |                   |                                                                                         |      |       |       |       |     |
|--------------|-------------------|-----------------------------------------------------------------------------------------|------|-------|-------|-------|-----|
| 1374530_at   | Fzd7              | Frizzled homolog 7 (Drosophila)                                                         | 180  | 0.639 | 1.044 | 1.516 | *†  |
| 1388395_at   | G0s2              | G0/G1switch 2                                                                           | 2705 | 0.249 | 0.570 | 0.595 | *#† |
| 1368947_at   | Gadd45a           | Growth arrest and DNA-damage-inducible, alpha                                           | 1505 | 1.521 | 1.243 | 0.955 | *   |
| 1372016_at   | Gadd45b           | Growth arrest and DNA-damage-inducible, beta                                            | 302  | 1.998 | 1.401 | 1.410 | *#† |
| 1388792_at   | Gadd45g           | Growth arrest and DNA-damage-inducible, gamma                                           | 968  | 2.510 | 2.295 | 1.039 | *#  |
| 1374759_at   | Galnt1            | UDP-N-acetyl-alpha-D-galactosamine:polypeptide N-acetylgalactosaminyltransferase-like 1 | 111  | 1.022 | 1.062 | 1.745 | †   |
| 1370293_at   | Gata4             | GATA binding protein 4                                                                  | 457  | 0.838 | 1.528 | 1.087 | #   |
| 1374125_at   | Gata5             | GATA binding protein 5                                                                  | 246  | 0.369 | 0.556 | 0.674 | *#† |
| 1387221_at   | Gch1              | GTP cyclohydrolase 1                                                                    | 108  | 1.596 | 1.595 | 1.139 | *#† |
| 1374903_at   | Gcnt2             | Glucosaminyl (N-acetyl) transferase 2, I-branching enzyme                               | 77   | 1.701 | 1.533 | 1.528 | *#† |
| 1374816_at   | Gcom1             | GRINL1A complex locus                                                                   | 2545 | 0.797 | 0.651 | 0.992 | *#  |
| 1382351_at   | Gem               | GTP binding protein (gene overexpressed in skeletal muscle)                             | 146  | 2.221 | 1.459 | 0.865 | *   |
| 1367954_at   | Gfra1             | GDNF family receptor alpha 1                                                            | 65   | 1.046 | 1.502 | 0.960 | #   |
| 1387007_at   | Gfra1             | GDNF family receptor alpha 1                                                            | 128  | 1.052 | 1.539 | 0.953 | #   |
| 1368924_at   | Ghr               | Growth hormone receptor                                                                 | 336  | 0.898 | 0.674 | 0.642 | #†  |
| 1373803_a_at | Ghr               | Growth hormone receptor                                                                 | 565  | 0.935 | 0.902 | 0.652 | †   |
| 1394095_at   | Gin1              | Gypsy retrotransposon integrase 1                                                       | 60   | 0.650 | 0.860 | 0.969 | *   |
| 1373504_at   | Glipr1            | GLI pathogenesis-related 1                                                              | 87   | 1.633 | 1.515 | 2.432 | *#† |
| 1390121_at   | Glis2             | GLIS family zinc finger 2                                                               | 989  | 1.230 | 1.643 | 1.111 | *#† |
| 1398724_at   | Glis2             | GLIS family zinc finger 2                                                               | 101  | 1.147 | 1.571 | 0.878 | #   |
| 1382521_at   | Gls               | Glutaminase                                                                             | 363  | 1.501 | 1.434 | 1.493 | *#† |
| 1382616_at   | Gls               | Glutaminase                                                                             | 158  | 1.406 | 1.563 | 1.567 | *#† |
| 1367632_at   | Glul              | Glutamate-ammonia ligase (glutamine synthetase)                                         | 949  | 1.215 | 1.015 | 0.615 | †   |
| 1367633_at   | Glul              | Glutamate-ammonia ligase (glutamine synthetase)                                         | 956  | 1.069 | 1.041 | 0.562 | †   |
| 1386870_at   | Glul              | Glutamate-ammonia ligase (glutamine synthetase)                                         | 1436 | 1.105 | 1.068 | 0.564 | †   |
| 1369560_at   | Gpd1              | Glycerol-3-phosphate dehydrogenase 1 (soluble)                                          | 159  | 1.033 | 0.994 | 0.513 | †   |
| 1371363_at   | Gpd1              | Glycerol-3-phosphate dehydrogenase 1 (soluble)                                          | 311  | 0.957 | 0.913 | 0.429 | †   |
| 1373773_at   | Gpm6a             | Glycoprotein m6a                                                                        | 182  | 0.922 | 0.663 | 1.022 | #   |
| 1388109_at   | Gpr116            | G protein-coupled receptor 116                                                          | 186  | 0.945 | 1.030 | 0.649 | †   |
| 1373158_at   | Gpr146            | G protein-coupled receptor 146                                                          | 886  | 0.688 | 0.535 | 0.753 | *#† |
| 1388243_at   | Gpr176            | G protein-coupled receptor 176                                                          | 474  | 1.700 | 1.639 | 1.718 | *#† |
| 1376828_at   | Gprc5a            | G protein-coupled receptor, family C, group 5, member A                                 | 180  | 2.619 | 3.671 | 1.532 | *#† |
| 1371671_at   | Gprc5b            | G protein-coupled receptor, family C, group 5, member B                                 | 247  | 1.445 | 1.940 | 0.818 | *#  |
| 1373336_at   | Gprc5b            | G protein-coupled receptor, family C, group 5, member B                                 | 96   | 1.763 | 1.642 | 0.806 | *#† |
| 1369113_at   | Grem1             | Gremlin 1, cysteine knot superfamily, homolog (Xenopus laevis)                          | 56   | 3.329 | 8.520 | 7.525 | *#† |
| 1378163_at   | Grem2             | Gremlin 2, cysteine knot superfamily, homolog (Xenopus laevis)                          | 101  | 0.870 | 0.831 | 0.452 | †   |
| 1387954_a_at | Grip2             | Glutamate receptor interacting protein 2                                                | 86   | 1.454 | 2.706 | 1.281 | *#† |
| 1388016_a_at | Grip2             | Glutamate receptor interacting protein 2                                                | 75   | 1.067 | 1.548 | 1.078 | #   |
| 1389890_at   | Gse1              | Genetic suppressor element 1                                                            | 109  | 1.823 | 1.381 | 0.715 | *#† |
| 1370365_at   | Gss               | Glutathione synthetase                                                                  | 323  | 1.428 | 1.897 | 1.101 | *#  |
| 1368354_at   | Gstt1             | Glutathione S-transferase theta 1                                                       | 186  | 0.961 | 0.937 | 0.525 | †   |
| 1371942_at   | Gstt3             | Glutathione S-transferase, theta 3                                                      | 197  | 1.024 | 0.899 | 0.203 | †   |
| 1368154_at   | Gucy1a3           | Guanylate cyclase 1, soluble, alpha 3                                                   | 341  | 0.592 | 0.409 | 0.777 | *#† |
| 1369097_s_at | Gucy1b3           | Guanylate cyclase 1, soluble, beta 3                                                    | 178  | 0.719 | 0.555 | 1.554 | *#† |
| 1374389_at   | Gucy1b3           | Guanylate cyclase 1, soluble, beta 3                                                    | 145  | 0.759 | 0.543 | 1.113 | #   |
| 1371298_at   | H19               | H19 fetal liver mRNA                                                                    | 989  | 0.886 | 0.941 | 0.566 | †   |
| 1388164_at   | H2-T23            | Histocompatibility 2, T region locus 23                                                 | 125  | 1.395 | 1.716 | 0.992 | *#  |
| 1371123_x_at | H2-T23 /// H2-T24 | Histocompatibility 2, T region locus 23 /// histocompatibility 2, T region locus 24     | 120  | 1.577 | 1.997 | 0.933 | *#† |
| 1388212_a_at | H2-T23 /// H2-T24 | Histocompatibility 2, T region locus 23 /// histocompatibility 2, T region locus 24     | 185  | 1.653 | 2.008 | 1.085 | *#  |

|              |                   |                                                                                     |      |       |       |       |     |
|--------------|-------------------|-------------------------------------------------------------------------------------|------|-------|-------|-------|-----|
| 1388213_a_at | H2-T23 /// H2-T24 | Histocompatibility 2, T region locus 23 /// histocompatibility 2, T region locus 24 | 95   | 1.633 | 2.099 | 0.981 | *#  |
| 1387396_at   | Hamp              | Hepcidin antimicrobial peptide                                                      | 1110 | 0.951 | 1.099 | 0.550 | †   |
| 1387548_at   | Has2              | Hyaluronan synthase 2                                                               | 119  | 1.730 | 1.161 | 0.734 | *†  |
| 1368983_at   | Hbefg             | Heparin-binding EGF-like growth factor                                              | 158  | 5.568 | 3.308 | 1.253 | *#  |
| 1371819_at   | Hdac5             | Histone deacetylase 5                                                               | 563  | 1.596 | 1.754 | 1.175 | *#  |
| 1374625_at   | Hes6              | Hairy and enhancer of split 6 (Drosophila)                                          | 635  | 0.697 | 0.591 | 0.993 | *#  |
| 1386080_at   | Hey1              | Hairy/enhancer-of-split related with YRPW motif 1                                   | 114  | 0.731 | 0.822 | 0.540 | *†  |
| 1384515_at   | Hey2              | Hairy/enhancer-of-split related with YRPW motif 2                                   | 323  | 0.625 | 0.576 | 1.018 | *#  |
| 1391429_at   | Hfe2              | Hemochromatosis type 2 (juvenile) (human homolog)                                   | 165  | 0.871 | 0.784 | 0.534 | #†  |
| 1388193_at   | Hip1              | Huntingtin interacting protein 1                                                    | 584  | 0.866 | 1.027 | 1.683 | †   |
| 1392941_at   | Hip1              | Huntingtin interacting protein 1                                                    | 469  | 0.912 | 0.978 | 1.653 | †   |
| 1370994_at   | Hip1r             | Huntingtin interacting protein 1 related                                            | 183  | 1.229 | 1.522 | 1.083 | *#  |
| 1390876_at   | Hisppd2a          | Histidine acid phosphatase domain containing 2A                                     | 112  | 1.246 | 1.409 | 1.646 | †   |
| 1391560_at   | Hivep1            | Human immunodeficiency virus type I enhancer binding protein 1                      | 57   | 1.550 | 1.496 | 1.065 | *#  |
| 1368546_at   | Hivep2            | Human immunodeficiency virus type I enhancer binding protein 2                      | 217  | 2.072 | 1.522 | 1.113 | *#  |
| 1388309_at   | Hmga1             | High mobility group AT-hook 1                                                       | 1696 | 1.606 | 2.016 | 1.011 | *#  |
| 1370080_at   | Hmox1             | Heme oxygenase (decycling) 1                                                        | 1759 | 0.661 | 0.577 | 0.692 | *#† |
| 1372693_at   | Hnrnpa1           | Heterogeneous nuclear ribonucleoprotein A1                                          | 430  | 0.652 | 0.797 | 0.998 | *#  |
| 1370454_at   | Homer1            | Homer homolog 1 (Drosophila)                                                        | 44   | 3.698 | 1.225 | 0.996 | *   |
| 1367816_at   | Hopx              | HOP homeobox                                                                        | 985  | 0.814 | 0.655 | 0.605 | *#† |
| 1393790_at   | Hrasls            | HRAS-like suppressor                                                                | 139  | 1.048 | 1.241 | 1.721 | #†  |
| 1372467_at   | Hs6st1            | Heparan sulfate 6-O-sulfotransferase 1                                              | 273  | 1.536 | 1.445 | 1.882 | †   |
| 1380138_at   | Hs6st2            | Heparan sulfate 6-O-sulfotransferase 2                                              | 57   | 0.971 | 0.846 | 1.810 | †   |
| 1368247_at   | Hspa1a /// Hspa1b | Heat shock 70kD protein 1A /// heat shock 70kD protein 1B (mapped)                  | 117  | 3.449 | 2.149 | 1.909 | *#† |
| 1370912_at   | Hspa1b            | Heat shock 70kD protein 1B (mapped)                                                 | 188  | 2.419 | 1.980 | 2.048 | *#† |
| 1373515_at   | Hspc159           | Galectin-related protein                                                            | 459  | 0.847 | 0.938 | 1.990 | †   |
| 1376867_at   | Hspc159           | Galectin-related protein                                                            | 237  | 0.774 | 1.035 | 2.134 | †   |
| 1372565_at   | Htra3             | HtrA serine peptidase 3                                                             | 1325 | 0.904 | 0.868 | 0.519 | †   |
| 1375306_at   | Htra3             | HtrA serine peptidase 3                                                             | 452  | 0.945 | 0.979 | 0.621 | †   |
| 1387202_at   | Icam1             | Intercellular adhesion molecule 1                                                   | 1101 | 2.306 | 1.614 | 1.158 | *#  |
| 1389235_at   | Icam2             | Intercellular adhesion molecule 2                                                   | 194  | 0.943 | 0.938 | 0.602 | †   |
| 1387028_a_at | Id1               | Inhibitor of DNA binding 1                                                          | 1120 | 1.540 | 1.412 | 0.816 | *#† |
| 1368870_at   | Id2               | Inhibitor of DNA binding 2                                                          | 545  | 0.468 | 0.828 | 0.791 | *   |
| 1375120_at   | Id4               | Inhibitor of DNA binding 4                                                          | 108  | 1.957 | 1.387 | 0.955 | *#  |
| 1375183_at   | Id4               | Inhibitor of DNA binding 4                                                          | 82   | 1.942 | 1.412 | 1.031 | *#  |
| 1394022_at   | Id4               | Inhibitor of DNA binding 4                                                          | 127  | 2.082 | 1.581 | 1.107 | *#  |
| 1369954_at   | Idh1              | Isocitrate dehydrogenase 1 (NADP+), soluble                                         | 2379 | 0.818 | 0.655 | 1.052 | *#  |
| 1372389_at   | Ier2              | Immediate early response 2                                                          | 362  | 1.697 | 1.422 | 1.424 | *#† |
| 1388587_at   | Ier3              | Immediate early response 3                                                          | 1518 | 1.565 | 1.444 | 1.402 | *#† |
| 1389355_at   | Ier5              | Immediate early response 5                                                          | 738  | 2.120 | 1.834 | 1.162 | *#† |
| 1389882_at   | Ier5              | Immediate early response 5                                                          | 149  | 1.964 | 1.816 | 0.937 | *#  |
| 1391026_at   | Ier5l             | Immediate early response 5-like                                                     | 689  | 0.621 | 0.722 | 0.883 | *#  |
| 1385702_at   | Ifi204            | Interferon activated gene 204                                                       | 547  | 1.722 | 0.940 | 0.785 | *   |
| 1384180_at   | Ifit2             | Interferon-induced protein with tetratricopeptide repeats 2                         | 276  | 0.720 | 0.651 | 1.252 | *#  |
| 1367795_at   | Ifrd1             | Interferon-related developmental regulator 1                                        | 813  | 2.099 | 1.337 | 1.435 | *#† |
| 1394038_at   | Ift81             | Intraflagellar transport 81 homolog (Chlamydomonas)                                 | 270  | 0.682 | 0.549 | 1.094 | *#  |
| 1371462_at   | Igfbp4            | Insulin-like growth factor binding protein 4                                        | 1119 | 0.899 | 0.915 | 0.540 | †   |
| 1370960_at   | Igfbp5            | Insulin-like growth factor binding protein 5                                        | 854  | 0.752 | 0.646 | 0.329 | *#† |
| 1387347_at   | Igfbp5            | Insulin-like growth factor binding protein 5                                        | 249  | 0.911 | 1.026 | 0.656 | †   |
| 1387348_at   | Igfbp5            | Insulin-like growth factor binding protein 5                                        | 424  | 0.909 | 0.830 | 0.398 | †   |

|              |         |                                                                            |      |        |        |       |     |
|--------------|---------|----------------------------------------------------------------------------|------|--------|--------|-------|-----|
| 1396152_s_at | Igfbp5  | Insulin-like growth factor binding protein 5                               | 310  | 0.835  | 0.778  | 0.348 | †   |
| 1397830_at   | Igfbp5  | Insulin-like growth factor binding protein 5                               | 191  | 0.875  | 0.874  | 0.601 | †   |
| 1390901_at   | Igsf10  | Immunoglobulin superfamily, member 10                                      | 734  | 0.841  | 0.617  | 0.517 | #†  |
| 1368424_at   | Ikbkb   | Inhibitor of kappa light polypeptide gene enhancer in B-cells, kinase beta | 240  | 1.062  | 1.512  | 1.024 | #   |
| 1369266_at   | Il13ra2 | Interleukin 13 receptor, alpha 2                                           | 48   | 1.622  | 1.861  | 1.254 | *#† |
| 1368375_a_at | Il15    | Interleukin 15                                                             | 67   | 0.716  | 0.851  | 1.680 | *†  |
| 1370692_at   | Il1r1   | Interleukin 1 receptor-like 1                                              | 104  | 1.957  | 2.949  | 1.161 | *#  |
| 1387273_at   | Il1r1   | Interleukin 1 receptor-like 1                                              | 326  | 11.010 | 13.013 | 5.149 | *#† |
| 1373140_at   | Il6st   | Interleukin 6 signal transducer                                            | 1639 | 0.740  | 0.645  | 0.825 | *#† |
| 1383489_at   | Il6st   | Interleukin 6 signal transducer                                            | 1057 | 0.716  | 0.622  | 0.831 | *#† |
| 1369208_at   | Il7     | Interleukin 7                                                              | 48   | 1.662  | 1.491  | 0.934 | *#† |
| 1387124_at   | Inha    | Inhibin alpha                                                              | 237  | 1.069  | 1.298  | 1.739 | †   |
| 1369012_at   | Inhba   | Inhibin beta-A                                                             | 74   | 1.913  | 1.899  | 0.994 | *#  |
| 1377163_at   | Inhbb   | Inhibin beta-B                                                             | 43   | 1.249  | 1.362  | 1.825 | *#† |
| 1373955_at   | Ipo5    | Importin 5                                                                 | 1536 | 1.470  | 1.670  | 1.141 | *#  |
| 1396742_at   | Ipo5    | Importin 5                                                                 | 357  | 1.404  | 1.759  | 1.188 | *#† |
| 1388762_at   | Iqgap1  | IQ motif containing GTPase activating protein 1                            | 642  | 1.163  | 1.370  | 1.502 | #†  |
| 1368073_at   | Irf1    | Interferon regulatory factor 1                                             | 434  | 0.544  | 0.611  | 0.718 | *#† |
| 1377379_at   | Irf6    | Interferon regulatory factor 6                                             | 102  | 1.350  | 1.696  | 0.734 | *#† |
| 1383448_at   | Irf9    | Interferon regulatory factor 9                                             | 275  | 0.591  | 0.680  | 0.956 | *#  |
| 1391489_at   | Irgm    | Immunity-related GTPase family, M                                          | 142  | 0.928  | 0.791  | 0.665 | †   |
| 1371091_at   | Irs2    | Insulin receptor substrate 2                                               | 359  | 1.411  | 1.560  | 1.128 | *#  |
| 1390776_at   | Irx3    | Iroquois homeobox 3                                                        | 627  | 0.636  | 0.746  | 1.098 | *   |
| 1392981_at   | Irx4    | Iroquois homeobox 4                                                        | 841  | 0.388  | 0.414  | 0.707 | *#† |
| 1387144_at   | Itga1   | Integrin alpha 1                                                           | 373  | 1.248  | 1.409  | 1.648 | *#† |
| 1394824_at   | Itga11  | Integrin, alpha 11                                                         | 43   | 0.896  | 0.847  | 2.134 | †   |
| 1385649_at   | Itga5   | Integrin alpha 5 (fibronectin receptor alpha)                              | 532  | 1.839  | 1.861  | 1.174 | *#  |
| 1371186_at   | Itga6   | Integrin, alpha 6                                                          | 235  | 1.254  | 1.778  | 1.060 | #   |
| 1393558_at   | Itga6   | Integrin, alpha 6                                                          | 185  | 1.286  | 1.865  | 1.196 | #   |
| 1383880_at   | Itgav   | Integrin alpha V                                                           | 341  | 1.391  | 1.457  | 1.656 | *#† |
| 1370802_at   | Itgb5   | Integrin, beta 5                                                           | 213  | 0.866  | 1.193  | 1.511 | †   |
| 1398358_a_at | Itgb5   | Integrin, beta 5                                                           | 863  | 1.009  | 1.159  | 1.594 | †   |
| 1387907_at   | Itpr1   | Inositol 1,4,5-triphosphate receptor, type 1                               | 205  | 0.914  | 0.710  | 1.536 | #†  |
| 1368725_at   | Jag1    | Jagged 1                                                                   | 139  | 0.868  | 0.700  | 1.528 | *#† |
| 1373122_at   | Jub     | Jub, ajuba homolog (Xenopus laevis)                                        | 518  | 1.476  | 1.861  | 1.546 | *#† |
| 1388230_at   | Jub     | Jub, ajuba homolog (Xenopus laevis)                                        | 209  | 1.380  | 1.765  | 1.300 | #   |
| 1387788_at   | Junb    | Jun B proto-oncogene                                                       | 986  | 1.615  | 1.283  | 0.993 | *#  |
| 1395851_at   | Kbtbd5  | Kelch repeat and BTB (POZ) domain containing 5                             | 249  | 2.351  | 2.841  | 1.163 | *#  |
| 1387160_at   | Kcne3   | Potassium voltage-gated channel, Isk-related subfamily, gene 3             | 524  | 0.850  | 1.047  | 0.554 | *†  |
| 1370773_a_at | Kcnip2  | Kv channel-interacting protein 2                                           | 164  | 0.884  | 0.979  | 0.447 | †   |
| 1373987_at   | Kcnip2  | Kv channel-interacting protein 2                                           | 422  | 0.956  | 0.947  | 0.417 | †   |
| 1387698_at   | Kcnj11  | Potassium inwardly rectifying channel, subfamily J, member 11              | 199  | 0.566  | 0.704  | 0.764 | *#† |
| 1391007_s_at | Kcnj11  | Potassium inwardly rectifying channel, subfamily J, member 11              | 279  | 0.598  | 0.678  | 0.753 | *#† |
| 1368911_at   | Kcnj8   | Potassium inwardly-rectifying channel, subfamily J, member 8               | 177  | 0.516  | 0.446  | 0.488 | *#† |
| 1387441_at   | Kcnk3   | Potassium channel, subfamily K, member 3                                   | 409  | 1.064  | 1.197  | 0.562 | #†  |
| 1371857_at   | Kctd10  | Potassium channel tetramerization domain containing 10                     | 806  | 1.410  | 1.555  | 1.252 | *#† |
| 1385226_at   | Kctd11  | Potassium channel tetramerisation domain containing 11                     | 283  | 1.758  | 1.315  | 1.391 | *#† |
| 1397764_at   | Kctd5   | Potassium channel tetramerisation domain containing 5                      | 566  | 1.630  | 1.614  | 0.979 | *#  |
| 1367948_a_at | Kdr     | Kinase insert domain protein receptor                                      | 858  | 0.835  | 0.723  | 0.546 | #†  |
| 1391526_at   | Kif16b  | Kinesin family member 16B                                                  | 107  | 0.892  | 0.655  | 0.824 | --- |
| 1391063_at   | Kif23   | Kinesin family member 23                                                   | 122  | 0.863  | 0.938  | 1.660 | †   |
| 1378197_at   | KIFC2   | Kinesin family member C2                                                   | 111  | 0.817  | 0.761  | 0.651 | *#† |

|              |              |                                                            |      |       |       |       |     |
|--------------|--------------|------------------------------------------------------------|------|-------|-------|-------|-----|
| 1389374_at   | Kifc3        | Kinesin family member C3                                   | 181  | 2.197 | 2.687 | 1.225 | *#† |
| 1388856_at   | Kitlg        | KIT ligand                                                 | 147  | 2.071 | 2.136 | 1.161 | *#† |
| 1396214_at   | Kitlg        | KIT ligand                                                 | 41   | 1.962 | 2.462 | 1.396 | *#† |
| 1368650_at   | Klf10        | Kruppel-like factor 10                                     | 461  | 2.031 | 1.347 | 0.964 | *#  |
| 1368249_at   | Klf15        | Kruppel-like factor 15                                     | 379  | 0.291 | 0.430 | 0.599 | *#† |
| 1381396_s_at | Klf15        | Kruppel-like factor 15                                     | 250  | 0.346 | 0.450 | 0.596 | *#† |
| 1378332_at   | Klf3         | Kruppel-like factor 3 (basic)                              | 640  | 0.586 | 1.039 | 0.797 | *†  |
| 1389479_at   | Klf3         | Kruppel-like factor 3 (basic)                              | 763  | 0.532 | 0.968 | 0.940 | *   |
| 1393150_at   | Klf3         | Kruppel-like factor 3 (basic)                              | 527  | 0.636 | 1.062 | 0.859 | *   |
| 1387260_at   | Klf4         | Kruppel-like factor 4 (gut)                                | 722  | 2.362 | 1.538 | 1.303 | *#† |
| 1368363_at   | Klf5         | Kruppel-like factor 5                                      | 102  | 5.859 | 1.917 | 1.395 | *#† |
| 1385961_at   | Klf5         | Kruppel-like factor 5                                      | 29   | 4.884 | 1.281 | 1.203 | *#† |
| 1394039_at   | Klf5         | Kruppel-like factor 5                                      | 61   | 5.712 | 1.438 | 1.372 | *#† |
| 1387060_at   | Klf6         | Kruppel-like factor 6                                      | 566  | 1.960 | 1.669 | 1.151 | *#  |
| 1370209_at   | Klf9         | Kruppel-like factor 9                                      | 626  | 1.599 | 1.208 | 1.388 | *#† |
| 1388799_at   | Klhl7        | Kelch-like 7 (Drosophila)                                  | 303  | 0.667 | 0.588 | 1.283 | *#† |
| 1370035_at   | Kras         | v-Ki-ras2 Kirsten rat sarcoma viral oncogene homolog       | 445  | 1.561 | 1.420 | 1.347 | *#† |
| 1388155_at   | Krt18        | Keratin 18                                                 | 72   | 1.218 | 2.274 | 1.646 | *#† |
| 1388433_at   | Krt19        | Keratin 19                                                 | 60   | 1.162 | 1.555 | 0.695 | #†  |
| 1379462_at   | Ksr1         | Kinase suppressor of ras 1                                 | 109  | 0.628 | 0.805 | 1.002 | *   |
| 1390851_at   | Lactb2       | Lactamase, beta 2                                          | 354  | 0.795 | 0.653 | 0.994 | #   |
| 1372884_at   | Large        | Like-glycosyltransferase                                   | 292  | 0.882 | 1.115 | 1.514 | †   |
| 1390207_at   | Lats2        | Large tumor suppressor 2                                   | 994  | 1.338 | 1.425 | 1.586 | *#† |
| 1387868_at   | Lbp          | Lipopolysaccharide binding protein                         | 672  | 0.883 | 0.896 | 0.656 | †   |
| 1387011_at   | Lcn2         | Lipocalin 2                                                | 3877 | 0.949 | 0.925 | 0.616 | †   |
| 1373233_at   | Lhfp12       | Lipoma HMGIC fusion partner-like 2                         | 461  | 0.725 | 0.709 | 0.557 | *#† |
| 1378179_a_at | Lhfp12       | Lipoma HMGIC fusion partner-like 2                         | 319  | 0.737 | 0.695 | 0.612 | *#† |
| 1376700_at   | Lima1        | LIM domain and actin binding 1                             | 409  | 1.409 | 1.023 | 1.558 | *†  |
| 1376632_at   | Lmcd1        | LIM and cysteine-rich domains 1                            | 489  | 5.688 | 6.271 | 2.698 | *#† |
| 1368054_at   | Lmna         | Lamin A                                                    | 752  | 1.445 | 1.669 | 1.180 | *#  |
| 1368055_a_at | Lmna         | Lamin A                                                    | 1822 | 1.467 | 1.651 | 1.142 | *#  |
| 1375726_at   | Lmo7         | LIM domain 7                                               | 941  | 1.255 | 1.527 | 1.011 | #   |
| 1377610_at   | Lmod2        | Leiomodin 2 (cardiac)                                      | 1550 | 2.013 | 1.618 | 1.256 | *#  |
| 1389464_at   | Lnx1         | Ligand of numb-protein X 1                                 | 118  | 0.719 | 0.582 | 0.538 | *#† |
| 1374171_at   | LOC100360403 | ATP-binding cassette, sub-family C, member 9-like          | 1173 | 0.825 | 0.724 | 0.565 | *#† |
| 1388985_at   | LOC100361467 | Hypothetical LOC100361467                                  | 1139 | 2.382 | 1.035 | 2.437 | --- |
| 1375706_at   | LOC100361913 | rCG54286-like                                              | 517  | 1.098 | 1.261 | 1.557 | #†  |
| 1376056_at   | LOC100362108 | Poly (ADP-ribose) polymerase family, member 10             | 137  | 0.790 | 0.630 | 0.759 | *#† |
| 1372647_at   | LOC100363743 | Proline arginine-rich end leucine-rich repeat protein-like | 240  | 1.456 | 1.907 | 2.479 | *#† |
| 1376151_a_at | LOC100365106 | rCG32755-like                                              | 229  | 0.716 | 0.770 | 0.608 | *#† |
| 1374029_at   | LOC100365118 | rCG54747-like                                              | 253  | 0.930 | 1.125 | 1.762 | †   |
| 1393210_at   | LOC100365207 | Extracellular matrix protein 2-like                        | 192  | 0.954 | 0.855 | 0.602 | †   |
| 1389918_at   | LOC290704    | Similar to palladin                                        | 237  | 2.232 | 1.188 | 1.059 | *   |
| 1398593_at   | LOC298139    | Similar to RIKEN cDNA 2310003M01                           | 45   | 1.298 | 1.804 | 1.177 | *#  |
| 1373232_at   | LOC302022    | Similar to nidogen 2 protein                               | 344  | 1.666 | 1.796 | 1.278 | *#† |
| 1381434_s_at | LOC302022    | Similar to nidogen 2 protein                               | 246  | 1.899 | 1.803 | 1.386 | *#† |
| 1372856_at   | LOC363331    | Similar to plasma membrane associated protein, S3-12       | 305  | 0.771 | 0.718 | 0.650 | *#† |
| 1381065_at   | LOC499120    | Hypothetical protein LOC499120                             | 350  | 0.572 | 0.710 | 0.899 | *#  |
| 1391030_at   | LOC500591    | Similar to calmodulin-binding transcription activator 1    | 837  | 1.082 | 1.679 | 1.905 | #†  |
| 1397536_at   | LOC500591    | Similar to calmodulin-binding transcription activator 1    | 322  | 1.244 | 1.569 | 1.919 | #†  |
| 1393309_at   | LOC503192    | Zinc finger protein ZFP                                    | 173  | 0.658 | 0.775 | 0.910 | *#  |
| 1385503_at   | LOC678772    | Similar to O-acetyltransferase                             | 139  | 0.776 | 0.650 | 1.053 | *#  |

|              |                          |                                                                                                                                               |      |       |       |       |     |
|--------------|--------------------------|-----------------------------------------------------------------------------------------------------------------------------------------------|------|-------|-------|-------|-----|
| 1375988_at   | LOC680262                | Hypothetical protein LOC680262                                                                                                                | 112  | 0.628 | 0.697 | 1.132 | *#  |
| 1385777_at   | LOC681647                | Similar to F43G9.2                                                                                                                            | 106  | 0.577 | 0.630 | 0.753 | *#† |
| 1383649_a_at | LOC681665                | Similar to integrator complex subunit 6 isoform a                                                                                             | 93   | 0.771 | 0.581 | 1.072 | #   |
| 1384390_at   | LOC681740                | Similar to jumonji protein                                                                                                                    | 228  | 1.544 | 0.940 | 0.840 | *   |
| 1385659_at   | LOC682861                | Similar to adenomatosis polyposis coli down-regulated 1                                                                                       | 151  | 0.790 | 0.542 | 0.741 | *#† |
| 1383149_at   | LOC684122                | Similar to development and differentiation enhancing factor-like 1                                                                            | 223  | 0.500 | 0.594 | 0.958 | *#  |
| 1377169_at   | LOC684173                | Similar to TNF receptor-associated factor 5                                                                                                   | 145  | 1.604 | 1.591 | 0.968 | *#  |
| 1388384_at   | LOC684259                | Similar to RUN and SH3 domain-containing protein 2                                                                                            | 216  | 1.076 | 1.542 | 1.155 | #   |
| 1374677_at   | LOC684425                | Similar to Adenylosuccinate synthetase isozyme 1 (Adenylosuccinate synthetase, muscle isozyme) (IMP--aspartate ligase 1) (AdSS 1) (AMPSase 1) | 593  | 0.881 | 0.963 | 0.638 | †   |
| 1373921_at   | LOC684538                | Similar to enoyl Coenzyme A hydratase domain containing 3                                                                                     | 102  | 0.690 | 0.615 | 0.970 | *#† |
| 1373403_at   | LOC684871                | Similar to Protein C8orf4 (Thyroid cancer protein 1) (TC-1)                                                                                   | 36   | 1.541 | 1.691 | 1.389 | *#† |
| 1376219_at   | LOC685152                | Similar to Probable phospholipid-transporting ATPase ID (ATPase class I type 8B member 2)                                                     | 796  | 1.438 | 1.522 | 1.350 | *#† |
| 1384406_at   | LOC685243                | Similar to C-C chemokine receptor type 11 (C-C CKR-11) (CC-CKR-11) (CCR-11) (Chemokine receptor-like 1) (CCRL1) (CCX CKR)                     | 127  | 0.982 | 1.204 | 1.839 | †   |
| 1374377_at   | LOC686781                | Similar to NFkB interacting protein 1                                                                                                         | 219  | 1.581 | 1.564 | 1.158 | *#  |
| 1384035_at   | LOC686794                | Similar to liver-specific bHLH-Zip transcription factor                                                                                       | 102  | 1.376 | 1.729 | 1.939 | --- |
| 1380486_at   | LOC687022                | Similar to SEC22 vesicle trafficking protein-like 3                                                                                           | 116  | 0.631 | 0.767 | 0.986 | *#  |
| 1371554_at   | LOC688173                | Similar to Telethonin (Titin cap protein)                                                                                                     | 337  | 2.129 | 2.257 | 1.560 | *#  |
| 1393691_at   | LOC688273                | Hypothetical protein LOC688273                                                                                                                | 55   | 0.702 | 0.911 | 1.689 | *†  |
| 1398732_at   | LOC688273                | Hypothetical protein LOC688273                                                                                                                | 119  | 0.733 | 0.812 | 2.056 | *#† |
| 1373659_at   | LOC689926                | Hypothetical protein LOC689926                                                                                                                | 236  | 0.435 | 0.494 | 0.934 | *#  |
| 1389365_at   | LOC690000                | Similar to CG3740-PA                                                                                                                          | 476  | 0.631 | 0.652 | 0.860 | *#† |
| 1375198_at   | LOC690139                | Similar to RNA binding motif protein 24                                                                                                       | 183  | 0.606 | 0.756 | 0.802 | *   |
| 1376441_at   | LOC690217 /// RGD1566114 | Similar to B0511.12 /// similar to chromosome 14 open reading frame 135                                                                       | 102  | 0.692 | 0.605 | 1.041 | *#  |
| 1395614_at   | LOC690372 /// U2af2      | Similar to U2 (RNU2) small nuclear RNA auxiliary factor 2 isoform b /// U2 small nuclear ribonucleoprotein auxiliary factor (U2AF) 2          | 85   | 0.896 | 0.975 | 0.608 | --- |
| 1388763_at   | LOC690976                | Similar to Calponin-2 (Calponin H2, smooth muscle) (Neutral calponin)                                                                         | 1497 | 1.423 | 1.039 | 1.667 | †   |
| 1390907_at   | LOC691170                | Similar to zinc finger protein 84 (HPF2)                                                                                                      | 88   | 0.658 | 0.753 | 0.914 | *#  |
| 1375148_at   | LOC691504                | Similar to Zinc finger protein ZFPM1 (Zinc finger protein multitype 1) (Friend of GATA protein 1) (Friend of GATA-1) (FOG-1)                  | 175  | 0.945 | 1.538 | 0.932 | #   |
| 1373172_at   | LOC691777                | Hypothetical protein LOC691777                                                                                                                | 256  | 0.517 | 0.880 | 1.162 | *   |
| 1368171_at   | Lox                      | Lysyl oxidase                                                                                                                                 | 922  | 1.068 | 1.157 | 2.263 | †   |
| 1368172_a_at | Lox                      | Lysyl oxidase                                                                                                                                 | 525  | 1.111 | 1.117 | 2.107 | †   |
| 1388902_at   | Loxl1                    | Lysyl oxidase-like 1                                                                                                                          | 1184 | 0.964 | 1.071 | 1.706 | †   |
| 1393177_at   | Lrch1                    | Leucine-rich repeats and calponin homology (CH) domain containing 1                                                                           | 88   | 0.931 | 1.201 | 1.557 | #†  |
| 1374626_at   | Lrg1                     | Leucine-rich alpha-2-glycoprotein 1                                                                                                           | 107  | 0.948 | 1.006 | 0.577 | †   |
| 1375531_at   | Lrig3                    | Leucine-rich repeats and immunoglobulin-like domains 3                                                                                        | 59   | 0.655 | 0.892 | 1.105 | *#  |
| 1389727_at   | Lrrc10                   | Leucine-rich repeat-containing 10                                                                                                             | 660  | 0.431 | 0.365 | 0.939 | *#  |
| 1395472_at   | Lrrc17                   | Leucine rich repeat containing 17                                                                                                             | 1339 | 0.622 | 0.430 | 0.570 | *#† |
| 1382941_at   | Lrrc32                   | Leucine rich repeat containing 32                                                                                                             | 415  | 1.196 | 1.502 | 1.424 | #†  |
| 1393460_at   | Lrrc33                   | Leucine rich repeat containing 33                                                                                                             | 180  | 1.011 | 0.965 | 0.612 | †   |
| 1385155_at   | Lrrfip1                  | Leucine rich repeat (in FLII) interacting protein 1                                                                                           | 92   | 1.344 | 1.836 | 1.305 | #   |
| 1389351_at   | Lrrfip1                  | Leucine rich repeat (in FLII) interacting protein 1                                                                                           | 521  | 1.599 | 2.256 | 1.665 | *#† |
| 1367912_at   | Ltbp1                    | Latent transforming growth factor beta binding protein 1                                                                                      | 175  | 1.188 | 1.525 | 2.776 | #†  |
| 1368448_at   | Ltbp2                    | Latent transforming growth factor beta binding protein 2                                                                                      | 417  | 1.095 | 1.206 | 2.574 | *#† |
| 1369325_at   | Lyst                     | Lysosomal trafficking regulator                                                                                                               | 103  | 1.195 | 1.609 | 0.989 | #   |
| 1382192_at   | Lyve1                    | Lymphatic vessel endothelial hyaluronan receptor 1                                                                                            | 237  | 0.986 | 0.913 | 0.514 | †   |
| 1382732_at   | Lyve1                    | Lymphatic vessel endothelial hyaluronan receptor 1                                                                                            | 153  | 0.878 | 0.912 | 0.578 | †   |
| 1387165_at   | Maf                      | v-maf musculoaponeurotic fibrosarcoma oncogene homolog (avian)                                                                                | 122  | 0.800 | 0.816 | 0.518 | †   |



|              |           |                                                                                                |      |       |       |       |     |
|--------------|-----------|------------------------------------------------------------------------------------------------|------|-------|-------|-------|-----|
| 1380229_at   | Maff      | v-maf musculoaponeurotic fibrosarcoma oncogene homolog F (avian)                               | 127  | 2.479 | 1.674 | 1.075 | *#  |
| 1372211_at   | Mafk      | v-maf musculoaponeurotic fibrosarcoma oncogene homolog K (avian)                               | 470  | 2.444 | 1.958 | 1.295 | *#  |
| 1387753_s_at | Magi3     | Membrane associated guanylate kinase, WW and PDZ domain containing 3                           | 363  | 1.515 | 2.202 | 1.016 | *#  |
| 1398866_at   | Magi3     | Membrane associated guanylate kinase, WW and PDZ domain containing 3                           | 253  | 1.635 | 2.275 | 1.295 | *#† |
| 1371988_at   | Man1a1    | Mannosidase, alpha, class 1A, member 1                                                         | 518  | 0.684 | 0.659 | 0.901 | *#  |
| 1368514_at   | Maob      | Monoamine oxidase B                                                                            | 119  | 0.997 | 0.824 | 0.581 | †   |
| 1371003_at   | Map1b     | Microtubule-associated protein 1B                                                              | 70   | 1.334 | 1.618 | 1.701 | *#† |
| 1373363_at   | Map1b     | Microtubule-associated protein 1B                                                              | 874  | 1.205 | 1.406 | 1.551 | #†  |
| 1395357_at   | Map1b     | Microtubule-associated protein 1B                                                              | 213  | 1.248 | 1.533 | 1.874 | #†  |
| 1388858_at   | Map2k3    | Mitogen activated protein kinase kinase 3                                                      | 1427 | 2.080 | 2.236 | 0.983 | *#  |
| 1368871_at   | Map3k1    | Mitogen activated protein kinase kinase kinase 1                                               | 332  | 0.708 | 0.784 | 0.617 | *#† |
| 1378552_at   | Map3k6    | Mitogen-activated protein kinase kinase kinase 6                                               | 153  | 1.284 | 1.532 | 1.171 | #   |
| 1372912_at   | Map3k7ip1 | Mitogen-activated protein kinase kinase kinase 7 interacting protein 1                         | 441  | 0.659 | 0.816 | 0.885 | *#† |
| 1371087_a_at | Map6      | Microtubule-associated protein 6                                                               | 140  | 1.407 | 1.996 | 1.573 | *#† |
| 1389543_at   | Masp1     | Mannan-binding lectin serine peptidase 1                                                       | 281  | 0.910 | 0.834 | 0.561 | #†  |
| 1372520_at   | Mcl1      | Myeloid cell leukemia sequence 1                                                               | 1710 | 1.582 | 1.287 | 1.014 | *#  |
| 1367682_at   | Mdk       | Midkine                                                                                        | 1153 | 0.941 | 0.959 | 0.606 | †   |
| 1379567_at   | Med13     | Mediator complex subunit 13                                                                    | 48   | 2.374 | 1.032 | 1.055 | *   |
| 1386156_at   | Med13     | Mediator complex subunit 13                                                                    | 51   | 1.864 | 1.011 | 0.880 | *   |
| 1376690_at   | Med21     | Mediator complex subunit 21                                                                    | 388  | 1.267 | 1.327 | 1.544 | *#† |
| 1373410_at   | Mef2c     | Myocyte enhancer factor 2C                                                                     | 339  | 1.264 | 1.718 | 1.503 | *#† |
| 1377696_at   | Mesdc1    | Mesoderm development candidate 1                                                               | 603  | 1.504 | 1.498 | 1.065 | *#  |
| 1389911_at   | Metrl     | Meteorin, glial cell differentiation regulator-like                                            | 821  | 1.928 | 2.031 | 1.071 | *#  |
| 1371479_at   | Mettl7a   | Methyltransferase like 7A                                                                      | 336  | 0.710 | 0.480 | 0.527 | *#† |
| 1380682_at   | Mex3b     | Mex3 homolog B (C. elegans)                                                                    | 101  | 0.682 | 0.728 | 1.626 | *#† |
| 1371815_at   | Mfap2     | Microfibrillar-associated protein 2                                                            | 242  | 0.975 | 0.929 | 0.439 | †   |
| 1373674_at   | Mfap5     | Microfibrillar associated protein 5                                                            | 81   | 1.105 | 1.087 | 3.194 | †   |
| 1367796_at   | Mgat1     | Mannosyl (alpha-1,3-)-glycoprotein beta-1,2-N-acetylglucosaminyltransferase                    | 491  | 1.552 | 1.487 | 1.506 | *#† |
| 1392547_at   | MGC105649 | Hypothetical LOC302884                                                                         | 125  | 1.485 | 1.873 | 1.268 | *#† |
| 1373333_at   | MGC109340 | Similar to Microsomal signal peptidase 23 kDa subunit (SPase 22 kDa subunit) (SPC22/23)        | 48   | 0.841 | 0.749 | 1.602 | #†  |
| 1376200_at   | MGC72974  | Hypothetical LOC316976                                                                         | 72   | 0.625 | 0.648 | 0.996 | *#  |
| 1367612_at   | Mgst1     | Microsomal glutathione S-transferase 1                                                         | 4162 | 0.832 | 0.747 | 0.581 | *#† |
| 1389096_at   | Mical2    | Microtubule associated monooxygenase, calponin and LIM domain containing 2                     | 866  | 1.124 | 1.622 | 1.381 | #†  |
| 1374775_at   | Mki67     | Antigen identified by monoclonal antibody Ki-67                                                | 163  | 0.660 | 0.580 | 1.301 | *#† |
| 1385953_at   | Mllt3     | Myeloid/lymphoid or mixed-lineage leukemia (trithorax homolog, Drosophila); translocated to, 3 | 88   | 0.781 | 0.645 | 0.829 | #   |
| 1371883_at   | Mmd       | Monocyte to macrophage differentiation-associated                                              | 852  | 1.535 | 1.868 | 1.326 | *#† |
| 1383668_at   | Mmp15     | Matrix metalloproteinase 15                                                                    | 402  | 0.742 | 0.578 | 0.645 | *#† |
| 1368590_at   | Mmp16     | Matrix metalloproteinase 16                                                                    | 130  | 1.233 | 1.453 | 1.577 | #†  |
| 1372904_at   | Mobkl2a   | MOB1, Mps One Binder kinase activator-like 2A (yeast)                                          | 308  | 1.972 | 1.330 | 1.183 | *#  |
| 1384900_at   | Mobkl2a   | MOB1, Mps One Binder kinase activator-like 2A (yeast)                                          | 84   | 1.992 | 1.427 | 1.087 | *#  |
| 1382190_at   | Mrgprf    | MAS-related GPR, member F                                                                      | 305  | 1.624 | 1.894 | 0.789 | *#† |
| 1371237_a_at | Mt1a      | Metallothionein 1a                                                                             | 6763 | 1.143 | 0.770 | 0.665 | #†  |
| 1397644_at   | Mtap      | Methylthioadenosine phosphorylase                                                              | 260  | 0.991 | 1.130 | 1.643 | †   |
| 1388661_at   | Mtp18     | Mitochondrial protein 18 kDa                                                                   | 233  | 0.731 | 0.637 | 0.978 | *#  |
| 1388874_at   | Mtss1     | Metastasis suppressor 1                                                                        | 1138 | 0.631 | 1.001 | 0.905 | *   |
| 1378765_at   | Mul1      | Mitochondrial ubiquitin ligase activator of NFKB 1                                             | 165  | 0.599 | 0.702 | 0.716 | *#† |
| 1373032_at   | Mustn1    | Musculoskeletal, embryonic nuclear protein 1                                                   | 120  | 1.573 | 2.390 | 2.215 | *#† |
| 1382748_at   | Mut       | Methylmalonyl-Coenzyme A mutase                                                                | 144  | 0.852 | 0.665 | 0.813 | #   |
| 1368308_at   | Myc       | Myelocytomatosis oncogene                                                                      | 498  | 1.751 | 1.439 | 1.763 | *#† |
| 1370896_a_at | Myh11     | Myosin, heavy chain 11, smooth muscle                                                          | 143  | 1.027 | 0.935 | 1.812 | †   |

|              |        |                                                                                     |      |        |       |       |     |
|--------------|--------|-------------------------------------------------------------------------------------|------|--------|-------|-------|-----|
| 1387049_at   | Myh6   | Myosin, heavy chain 6, cardiac muscle, alpha                                        | 4281 | 0.849  | 0.872 | 0.622 | *#† |
| 1396165_at   | Myh6   | Myosin, heavy chain 6, cardiac muscle, alpha                                        | 1159 | 0.851  | 0.846 | 0.626 | †   |
| 1367928_at   | Myh7   | Myosin, heavy chain 7, cardiac muscle, beta                                         | 3085 | 0.875  | 0.954 | 1.634 | †   |
| 1371725_at   | Myh9   | Myosin, heavy chain 9, non-muscle                                                   | 1960 | 1.200  | 1.326 | 1.648 | †   |
| 1387402_at   | Myh9   | Myosin, heavy chain 9, non-muscle                                                   | 719  | 1.242  | 1.531 | 1.717 | #†  |
| 1389474_at   | Mylip  | Myosin regulatory light chain interacting protein                                   | 111  | 0.460  | 0.713 | 1.079 | *#  |
| 1388917_at   | Myo1d  | Myosin ID                                                                           | 249  | 0.911  | 1.077 | 2.012 | †   |
| 1375857_at   | Myof   | Myoferlin                                                                           | 827  | 1.030  | 1.338 | 1.730 | #†  |
| 1374088_at   | Mypn   | Myopalladin                                                                         | 270  | 1.619  | 2.191 | 0.842 | *#  |
| 1372295_at   | Narf   | Nuclear prelamin A recognition factor                                               | 426  | 0.700  | 0.602 | 0.850 | *#  |
| 1384009_at   | Narf   | Nuclear prelamin A recognition factor                                               | 169  | 0.704  | 0.634 | 0.600 | *#† |
| 1374799_at   | Ncapd2 | Non-SMC condensin I complex, subunit D2                                             | 81   | 0.656  | 0.695 | 1.068 | *#  |
| 1383166_at   | Ncoa1  | Nuclear receptor coactivator 1                                                      | 457  | 0.767  | 0.638 | 0.807 | *#† |
| 1390010_at   | Ncoa1  | Nuclear receptor coactivator 1                                                      | 209  | 0.771  | 0.651 | 0.814 | *#† |
| 1392385_at   | Ncoa3  | Nuclear receptor coactivator 3                                                      | 65   | 0.633  | 0.807 | 0.833 | *†  |
| 1383938_at   | Ncoa7  | Nuclear receptor coactivator 7                                                      | 367  | 0.634  | 0.626 | 0.655 | *#† |
| 1374650_at   | Nedd9  | Neural precursor cell expressed, developmentally down-regulated 9                   | 343  | 1.027  | 1.527 | 1.756 | #†  |
| 1396053_at   | Nedd9  | Neural precursor cell expressed, developmentally down-regulated 9                   | 147  | 1.005  | 1.667 | 1.879 | #†  |
| 1386948_at   | Nes    | Nestin                                                                              | 170  | 1.260  | 1.545 | 1.259 | *#† |
| 1372000_at   | Net1   | Neuroepithelial cell transforming 1                                                 | 217  | 0.590  | 0.461 | 1.053 | *#  |
| 1369679_a_at | Nfia   | Nuclear factor I/A                                                                  | 769  | 0.961  | 0.636 | 1.006 | #   |
| 1368488_at   | Nfil3  | Nuclear factor, interleukin 3 regulated                                             | 316  | 1.961  | 1.703 | 1.192 | *#  |
| 1389538_at   | Nfkbia | Nuclear factor of kappa light polypeptide gene enhancer in B-cells inhibitor, alpha | 768  | 0.845  | 0.904 | 0.582 | †   |
| 1392686_at   | Nkd2   | Naked cuticle homolog 2 (Drosophila)                                                | 77   | 0.961  | 0.936 | 2.212 | †   |
| 1372236_at   | Nod1   | Nucleotide-binding oligomerization domain containing 1                              | 450  | 0.648  | 0.754 | 0.740 | *#† |
| 1373839_at   | Nope   | Neighbor of Punc E11                                                                | 697  | 0.751  | 0.485 | 0.585 | *#† |
| 1371166_at   | Nos3   | Nitric oxide synthase 3, endothelial cell                                           | 161  | 0.872  | 0.884 | 0.590 | †   |
| 1371491_at   | Notch1 | Notch homolog 1, translocation-associated (Drosophila)                              | 98   | 1.081  | 1.114 | 0.651 | †   |
| 1368883_at   | Nov    | Nephroblastoma overexpressed gene                                                   | 346  | 1.108  | 1.160 | 2.895 | †   |
| 1382874_at   | Npl    | N-acetylneuraminase pyruvate lyase                                                  | 65   | 0.762  | 0.667 | 0.823 | #   |
| 1370517_at   | Nptx1  | Neuronal pentraxin 1                                                                | 46   | 1.097  | 1.875 | 0.669 | #†  |
| 1376362_at   | Nptxr  | Neuronal pentraxin receptor                                                         | 73   | 1.276  | 1.735 | 2.097 | #†  |
| 1391059_at   | Npw    | Neuropeptide W                                                                      | 81   | 1.397  | 1.596 | 1.410 | *#† |
| 1387154_at   | Npy    | Neuropeptide Y                                                                      | 1109 | 0.805  | 0.663 | 0.581 | *#  |
| 1368376_at   | Nr0b2  | Nuclear receptor subfamily 0, group B, member 2                                     | 132  | 0.447  | 0.451 | 0.819 | *#  |
| 1370541_at   | Nr1d2  | Nuclear receptor subfamily 1, group D, member 2                                     | 395  | 0.673  | 0.618 | 0.969 | *#  |
| 1386935_at   | Nr4a1  | Nuclear receptor subfamily 4, group A, member 1                                     | 215  | 3.778  | 2.047 | 1.580 | *#† |
| 1369067_at   | Nr4a3  | Nuclear receptor subfamily 4, group A, member 3                                     | 29   | 10.843 | 3.006 | 2.105 | *#† |
| 1393389_at   | Nr4a3  | Nuclear receptor subfamily 4, group A, member 3                                     | 95   | 2.025  | 1.486 | 1.386 | *#† |
| 1387267_at   | Ntf3   | Neurotrophin 3                                                                      | 93   | 0.526  | 0.522 | 0.655 | *#† |
| 1383614_at   | Nuak2  | NUAK family, SNF1-like kinase, 2                                                    | 188  | 2.289  | 1.453 | 1.577 | *#† |
| 1370000_at   | Nucb2  | Nucleobindin 2                                                                      | 959  | 0.964  | 1.016 | 1.523 | †   |
| 1388198_at   | Nupl1  | Nucleoporin like 1                                                                  | 41   | 1.755  | 1.249 | 1.198 | *#† |
| 1391749_a_at | Nxn12  | Nucleoredoxin-like 2                                                                | 208  | 1.172  | 1.559 | 1.278 | #   |
| 1368962_at   | Nxph3  | Neurexophilin 3                                                                     | 45   | 1.316  | 1.948 | 0.966 | *#  |
| 1374818_at   | Nxph3  | Neurexophilin 3                                                                     | 101  | 1.456  | 1.852 | 0.903 | *#  |
| 1392579_at   | Obfc2a | Oligonucleotide/oligosaccharide-binding fold containing 2A                          | 327  | 0.898  | 0.866 | 0.648 | †   |
| 1369008_a_at | Olfm1  | Olfactomedin 1                                                                      | 102  | 1.180  | 1.289 | 2.253 | †   |
| 1382134_at   | Olfml1 | Olfactomedin-like 1                                                                 | 370  | 0.865  | 0.750 | 0.548 | *#† |
| 1383453_at   | Olfml1 | Olfactomedin-like 1                                                                 | 437  | 0.804  | 0.622 | 0.573 | *#† |
| 1368683_at   | Olr1   | Oxidized low density lipoprotein (lectin-like) receptor 1                           | 319  | 2.394  | 2.888 | 2.262 | *#† |
| 1384136_at   | Osbpl3 | Oxysterol binding protein-like 3                                                    | 172  | 1.313  | 1.569 | 1.062 | *#  |

|              |         |                                                                                                  |      |       |       |       |     |
|--------------|---------|--------------------------------------------------------------------------------------------------|------|-------|-------|-------|-----|
| 1384254_at   | Otud1   | OTU domain containing 1                                                                          | 743  | 4.625 | 2.813 | 1.573 | *#† |
| 1391530_a_at | Oxsm    | 3-oxoacyl-ACP synthase, mitochondrial                                                            | 145  | 0.581 | 0.721 | 1.023 | *#  |
| 1369673_at   | P2rx5   | Purinergic receptor P2X, ligand-gated ion channel, 5                                             | 55   | 1.402 | 1.672 | 1.244 | *#  |
| 1369674_at   | P2rx5   | Purinergic receptor P2X, ligand-gated ion channel, 5                                             | 60   | 1.523 | 2.395 | 1.316 | *#† |
| 1393129_at   | P4ha3   | Procollagen-proline, 2-oxoglutarate 4-dioxygenase (proline 4-hydroxylase), alpha polypeptide III | 275  | 1.072 | 1.074 | 2.458 | †   |
| 1389093_at   | Pak1    | P21 (CDKN1A)-activated kinase 1                                                                  | 82   | 1.098 | 1.070 | 1.618 | †   |
| 1376924_a_at | Palmd   | Palmdelphin                                                                                      | 191  | 0.670 | 0.521 | 1.078 | *#  |
| 1382864_at   | Palmd   | Palmdelphin                                                                                      | 174  | 0.797 | 0.603 | 0.768 | *#† |
| 1395734_at   | Palmd   | Palmdelphin                                                                                      | 164  | 0.708 | 0.633 | 0.826 | *#  |
| 1394966_at   | Pap2d   | Phosphatidic acid phosphatase type 2                                                             | 222  | 0.953 | 0.755 | 1.552 | #†  |
| 1383224_at   | Pard6b  | Par-6 (partitioning defective 6) homolog beta (C. elegans)                                       | 155  | 5.334 | 1.707 | 1.007 | *#  |
| 1368702_at   | Pawr    | PRKC, apoptosis, WT1, regulator                                                                  | 262  | 0.978 | 1.106 | 1.834 | †   |
| 1384824_at   | Pcdh18  | Protocadherin 18                                                                                 | 358  | 0.624 | 1.010 | 1.325 | *†  |
| 1385229_at   | Pcdh20  | Protocadherin 20                                                                                 | 52   | 1.569 | 0.993 | 1.622 | *†  |
| 1388962_at   | Pcgf2   | Polycomb group ring finger 2                                                                     | 153  | 0.614 | 0.739 | 0.971 | *#  |
| 1377042_at   | Pcgf5   | Polycomb group ring finger 5                                                                     | 611  | 1.195 | 1.527 | 1.395 | *#† |
| 1374454_at   | Pcmdt2  | Protein-L-isoaspartate (D-aspartate) O-methyltransferase domain containing 2                     | 208  | 0.830 | 0.625 | 0.979 | #   |
| 1375916_at   | Pcmdt2  | Protein-L-isoaspartate (D-aspartate) O-methyltransferase domain containing 2                     | 445  | 0.828 | 0.666 | 0.790 | #   |
| 1373368_at   | PCOLCE2 | Procollagen C-endopeptidase enhancer 2                                                           | 82   | 1.137 | 1.705 | 1.871 | #†  |
| 1392773_at   | Pcsk5   | Proprotein convertase subtilisin/kexin type 5                                                    | 122  | 1.082 | 0.874 | 0.587 | †   |
| 1382345_at   | Pctk2   | PCTAIRE protein kinase 2                                                                         | 407  | 1.981 | 1.471 | 1.167 | *#† |
| 1383326_a_at | Pdcd4   | Programmed cell death 4                                                                          | 154  | 0.698 | 0.479 | 0.830 | --- |
| 1383327_at   | Pdcd4   | Programmed cell death 4                                                                          | 231  | 0.749 | 0.614 | 0.821 | *#  |
| 1383328_x_at | Pdcd4   | Programmed cell death 4                                                                          | 322  | 0.756 | 0.636 | 0.759 | #†  |
| 1370427_at   | Pdgfa   | Platelet-derived growth factor alpha polypeptide                                                 | 339  | 1.612 | 1.917 | 1.586 | *#† |
| 1379375_at   | Pdgfa   | Platelet-derived growth factor alpha polypeptide                                                 | 373  | 1.707 | 1.943 | 1.359 | *#† |
| 1370941_at   | Pdgfra  | Platelet derived growth factor receptor, alpha polypeptide                                       | 2234 | 0.671 | 0.819 | 0.609 | *#† |
| 1367892_at   | Pdk2    | Pyruvate dehydrogenase kinase, isozyme 2                                                         | 1181 | 0.827 | 0.766 | 0.645 | *#† |
| 1367946_at   | Pdlim1  | PDZ and LIM domain 1                                                                             | 1439 | 0.996 | 1.031 | 1.535 | †   |
| 1368703_at   | Pdlim5  | PDZ and LIM domain 5                                                                             | 1161 | 1.098 | 1.475 | 1.623 | --- |
| 1372745_at   | Pdlim5  | PDZ and LIM domain 5                                                                             | 1431 | 1.508 | 1.705 | 1.154 | *#  |
| 1370347_at   | Pdlim7  | PDZ and LIM domain 7                                                                             | 504  | 1.428 | 1.546 | 1.904 | *#† |
| 1371441_at   | Pea15a  | Phosphoprotein enriched in astrocytes 15A                                                        | 800  | 1.082 | 1.268 | 1.548 | #†  |
| 1388339_at   | Pea15a  | Phosphoprotein enriched in astrocytes 15A                                                        | 702  | 1.175 | 1.386 | 1.502 | #†  |
| 1371545_at   | Pecam1  | Platelet/endothelial cell adhesion molecule 1                                                    | 214  | 0.971 | 0.940 | 0.612 | †   |
| 1371684_at   | Pelo    | Pelota homolog (Drosophila)                                                                      | 1129 | 1.896 | 1.759 | 0.967 | *#  |
| 1367949_at   | Penk1   | Proenkephalin 1                                                                                  | 3520 | 1.089 | 1.102 | 0.420 | †   |
| 1386961_at   | Pfkm    | Phosphofructokinase, muscle                                                                      | 913  | 0.853 | 0.781 | 0.602 | †   |
| 1367951_at   | Pgam2   | Phosphoglycerate mutase 2 (muscle)                                                               | 352  | 0.931 | 1.014 | 0.604 | †   |
| 1382303_at   | Phactr1 | Phosphatase and actin regulator 1                                                                | 114  | 0.863 | 0.658 | 0.685 | #†  |
| 1368860_at   | Phlda1  | Pleckstrin homology-like domain, family A, member 1                                              | 292  | 2.497 | 1.778 | 1.289 | *#† |
| 1375224_at   | Phlda3  | Pleckstrin homology-like domain, family A, member 3                                              | 873  | 1.093 | 1.606 | 1.278 | #†  |
| 1387271_at   | Phyh    | Phytanoyl-CoA 2-hydroxylase                                                                      | 1424 | 0.885 | 0.868 | 0.661 | †   |
| 1393245_at   | Phyh    | Phytanoyl-CoA 2-hydroxylase                                                                      | 1096 | 0.895 | 0.829 | 0.635 | #†  |
| 1370196_at   | Pias3   | Protein inhibitor of activated STAT, 3                                                           | 326  | 0.666 | 0.725 | 0.936 | *#  |
| 1388525_at   | Pik3ip1 | Phosphoinositide-3-kinase interacting protein 1                                                  | 537  | 0.281 | 0.450 | 0.837 | *#  |
| 1369862_at   | Pim1    | Pim-1 oncogene                                                                                   | 42   | 1.529 | 1.127 | 0.894 | *   |
| 1367725_at   | Pim3    | Pim-3 oncogene                                                                                   | 585  | 1.585 | 1.186 | 0.908 | *†  |
| 1372199_at   | Pink1   | PTEN induced putative kinase 1                                                                   | 539  | 0.941 | 0.920 | 0.659 | †   |
| 1371600_at   | Pkig    | Protein kinase inhibitor, gamma                                                                  | 1331 | 1.077 | 1.309 | 1.639 | #†  |
| 1385182_at   | Pkp1    | Plakophilin 1                                                                                    | 90   | 1.199 | 1.541 | 1.583 | *#† |

|              |          |                                                                     |      |       |       |       |     |
|--------------|----------|---------------------------------------------------------------------|------|-------|-------|-------|-----|
| 1370445_at   | Pla1a    | Phospholipase A1 member A                                           | 305  | 1.055 | 1.147 | 1.538 | †   |
| 1370202_at   | Pla2g16  | Phospholipase A2, group XVI                                         | 412  | 1.014 | 1.040 | 0.601 | †   |
| 1368128_at   | Pla2g2a  | Phospholipase A2, group IIA (platelets, synovial fluid)             | 2885 | 0.914 | 0.848 | 0.295 | †   |
| 1384558_at   | Plac9    | Placenta-specific 9                                                 | 297  | 0.989 | 1.120 | 2.315 | †   |
| 1387122_at   | Plagl1   | Pleiomorphic adenoma gene-like 1                                    | 379  | 1.831 | 2.138 | 0.955 | *#  |
| 1387675_at   | Plau     | Plasminogen activator, urokinase                                    | 254  | 1.011 | 0.986 | 0.601 | †   |
| 1398287_at   | Plau     | Plasminogen activator, urokinase                                    | 108  | 0.926 | 1.018 | 0.513 | †   |
| 1387269_s_at | Plaur    | Plasminogen activator, urokinase receptor                           | 162  | 4.663 | 3.139 | 1.534 | *#† |
| 1367916_at   | Plcd1    | Phospholipase C, delta 1                                            | 343  | 1.351 | 1.629 | 0.980 | *#† |
| 1376137_at   | Plekhh2  | Pleckstrin homology domain containing, family B (evectins) member 2 | 351  | 1.198 | 1.536 | 1.120 | #   |
| 1368106_at   | Plk2     | Polo-like kinase 2 (Drosophila)                                     | 842  | 1.904 | 1.611 | 1.041 | *#  |
| 1372897_at   | Plod2    | Procollagen lysine, 2-oxoglutarate 5-dioxygenase 2                  | 1817 | 1.046 | 1.264 | 1.926 | #†  |
| 1369029_at   | Plscr1   | Phospholipid scramblase 1                                           | 126  | 2.334 | 2.075 | 2.072 | *#† |
| 1391435_at   | Pltp     | Phospholipid transfer protein                                       | 623  | 0.970 | 0.860 | 0.364 | †   |
| 1389341_at   | Plxnd1   | Plexin D1                                                           | 402  | 0.897 | 0.934 | 0.656 | †   |
| 1389809_at   | Pmepa1   | Prostate transmembrane protein, androgen induced 1                  | 1010 | 1.326 | 1.902 | 2.068 | #†  |
| 1392534_at   | Pmepa1   | Prostate transmembrane protein, androgen induced 1                  | 1543 | 1.262 | 1.795 | 2.205 | #†  |
| 1384523_at   | Pms1     | PMS1 postmeiotic segregation increased 1 (S. cerevisiae)            | 119  | 0.641 | 0.798 | 1.062 | *#  |
| 1373312_at   | Pnkd     | Paroxysmal nonkinesinogenic dyskinesia                              | 362  | 0.775 | 0.609 | 0.853 | *#† |
| 1370381_at   | Pnrc1    | Proline-rich nuclear receptor coactivator 1                         | 1024 | 0.675 | 0.635 | 0.756 | *#† |
| 1368341_at   | Polb     | Polymerase (DNA directed), beta                                     | 289  | 1.232 | 1.531 | 1.070 | *#  |
| 1370950_at   | Ppap2b   | Phosphatidic acid phosphatase type 2B                               | 341  | 1.326 | 1.209 | 0.606 | *   |
| 1372531_at   | Ppfbp2   | PTPRF interacting protein, binding protein 2 (liprin beta 2)        | 86   | 0.727 | 0.668 | 0.572 | *#† |
| 1391187_at   | Ppl      | Periplakin                                                          | 102  | 2.181 | 3.618 | 0.718 | *#† |
| 1368910_at   | Ppm2c    | Protein phosphatase 2C, magnesium dependent, catalytic subunit      | 414  | 1.731 | 1.234 | 1.089 | *#  |
| 1386971_at   | Ppp1r10  | Protein phosphatase 1, regulatory subunit 10                        | 390  | 0.541 | 1.116 | 0.840 | *   |
| 1367813_at   | Ppp1r14a | Protein phosphatase 1, regulatory (inhibitor) subunit 14A           | 132  | 0.869 | 0.907 | 2.321 | †   |
| 1397559_at   | Ppp1r3a  | Protein phosphatase 1, regulatory (inhibitor) subunit 3A            | 123  | 0.747 | 0.490 | 0.754 | #   |
| 1371161_at   | Ppp1r3b  | Protein phosphatase 1, regulatory (inhibitor) subunit 3B            | 92   | 0.460 | 0.616 | 0.715 | *#† |
| 1384262_at   | Ppp1r3b  | Protein phosphatase 1, regulatory (inhibitor) subunit 3B            | 198  | 0.331 | 0.397 | 0.550 | *#† |
| 1390839_at   | Pqlc3    | PQ loop repeat containing 3                                         | 644  | 0.962 | 1.281 | 2.204 | #†  |
| 1391121_at   | Pragmin  | Pragma of Rnd2                                                      | 105  | 2.915 | 1.873 | 0.930 | *#  |
| 1387886_at   | Prelp    | Proline arginine-rich end leucine-rich repeat protein               | 282  | 1.318 | 1.830 | 1.877 | #†  |
| 1379369_at   | Prickle1 | Prickle homolog 1 (Drosophila)                                      | 859  | 1.089 | 1.313 | 1.512 | #†  |
| 1386653_at   | Prickle2 | Prickle homolog 2 (Drosophila)                                      | 308  | 0.423 | 0.833 | 0.846 | *#† |
| 1390156_a_at | Prickle2 | Prickle homolog 2 (Drosophila)                                      | 297  | 0.349 | 0.758 | 0.875 | *   |
| 1372176_at   | Prkca    | Protein kinase C, alpha                                             | 129  | 1.166 | 1.602 | 1.173 | #   |
| 1378978_a_at | Prr12    | Proline rich 12                                                     | 99   | 0.526 | 0.702 | 1.177 | *#  |
| 1392593_a_at | Prr12    | Proline rich 12                                                     | 128  | 0.600 | 0.763 | 1.126 | *#  |
| 1373152_at   | Prss23   | Protease, serine, 23                                                | 2076 | 1.465 | 1.701 | 1.606 | *#† |
| 1379747_at   | Prss35   | Protease, serine, 35                                                | 96   | 2.348 | 3.245 | 4.688 | #†  |
| 1386073_at   | Psmd14   | Proteasome (prosome, macropain) 26S subunit, non-ATPase, 14         | 214  | 1.189 | 1.098 | 1.538 | --- |
| 1367851_at   | Ptgs     | Prostaglandin D2 synthase (brain)                                   | 423  | 0.893 | 0.897 | 0.641 | †   |
| 1368014_at   | Ptges    | Prostaglandin E synthase                                            | 81   | 0.896 | 0.953 | 0.657 | †   |
| 1370012_at   | Ptgis    | Prostaglandin I2 (prostacyclin) synthase                            | 1407 | 1.049 | 1.355 | 2.168 | †   |
| 1368259_at   | Ptgs1    | Prostaglandin-endoperoxide synthase 1                               | 85   | 1.029 | 1.202 | 1.904 | †   |
| 1368527_at   | Ptgs2    | Prostaglandin-endoperoxide synthase 2                               | 48   | 4.378 | 2.761 | 1.736 | *#† |
| 1369968_at   | Ptn      | Pleiotrophin                                                        | 1280 | 0.954 | 0.885 | 0.646 | †   |
| 1368645_at   | Ptpn1    | Protein tyrosine phosphatase, non-receptor type 1                   | 319  | 1.406 | 1.503 | 0.735 | *#† |
| 1369496_at   | Ptpn12   | Protein tyrosine phosphatase, non-receptor type 12                  | 203  | 1.544 | 1.507 | 1.139 | *#† |
| 1382154_at   | Ptpn12   | Protein tyrosine phosphatase, non-receptor type 12                  | 643  | 1.711 | 1.517 | 1.118 | *#  |
| 1389362_at   | Ptpn3    | Protein tyrosine phosphatase, non-receptor type 3                   | 996  | 0.733 | 0.652 | 1.046 | *#  |

|              |            |                                                                  |      |       |       |       |     |
|--------------|------------|------------------------------------------------------------------|------|-------|-------|-------|-----|
| 1370362_at   | Ptpn       | Protein tyrosine phosphatase, receptor type, N                   | 624  | 1.300 | 1.634 | 1.339 | *#† |
| 1370214_at   | Pvalb      | Parvalbumin                                                      | 348  | 0.880 | 1.110 | 0.286 | †   |
| 1370177_at   | PVR        | Poliovirus receptor                                              | 312  | 3.828 | 2.916 | 1.447 | *#† |
| 1397363_at   | Pvrl3      | Poliovirus receptor-related 3                                    | 118  | 1.834 | 1.552 | 1.334 | *#† |
| 1390422_at   | Pxk        | PX domain containing serine/threonine kinase                     | 282  | 0.640 | 0.811 | 0.926 | *#  |
| 1383831_at   | Qrs1       | Glutamyl-tRNA synthase (glutamine-hydrolyzing)-like 1            | 144  | 0.605 | 0.592 | 0.859 | *#† |
| 1373646_at   | Rab15      | RAB15, member RAS oncogene family                                | 63   | 1.227 | 1.524 | 1.267 | *#† |
| 1396716_at   | Rab23      | RAB23, member RAS oncogene family                                | 157  | 1.402 | 1.633 | 1.615 | *#† |
| 1370414_at   | Rab38      | RAB38, member RAS oncogene family                                | 298  | 0.660 | 0.524 | 0.624 | *#† |
| 1370061_at   | Rab3b      | RAB3B, member RAS oncogene family                                | 193  | 1.036 | 0.907 | 0.532 | †   |
| 1374502_at   | Rab3gap2   | RAB3 GTPase activating protein subunit 2                         | 318  | 1.453 | 1.810 | 1.383 | *#† |
| 1377902_a_at | Rad52      | RAD52 homolog ( <i>S. cerevisiae</i> )                           | 81   | 0.646 | 0.714 | 0.749 | *#† |
| 1384528_at   | Rai14      | Retinoic acid induced 14                                         | 109  | 1.601 | 2.470 | 1.825 | *#† |
| 1389263_at   | Rai14      | Retinoic acid induced 14                                         | 889  | 1.690 | 2.464 | 1.886 | *#† |
| 1367825_at   | Ralgds     | Ral guanine nucleotide dissociation stimulator                   | 362  | 0.917 | 0.868 | 0.663 | #†  |
| 1383571_at   | Rapgef1    | Rap guanine nucleotide exchange factor (GEF)-like 1              | 88   | 1.303 | 1.660 | 0.814 | *#  |
| 1376755_at   | Rarb       | Retinoic acid receptor, beta                                     | 239  | 0.552 | 0.517 | 0.648 | *#† |
| 1370085_at   | Rasa1      | RAS p21 protein activator (GTPase activating protein) 1          | 516  | 1.338 | 1.570 | 1.336 | *#† |
| 1384386_at   | Rasa2      | RAS p21 protein activator 2                                      | 88   | 1.463 | 1.725 | 1.201 | *#  |
| 1370942_at   | Rasa3      | RAS p21 protein activator 3                                      | 497  | 0.847 | 1.097 | 0.541 | †   |
| 1390159_at   | Rasgrp3    | RAS guanyl releasing protein 3 (calcium and DAG-regulated)       | 948  | 1.538 | 1.968 | 1.076 | *#  |
| 1388970_at   | Rasip1     | Ras interacting protein 1                                        | 169  | 0.990 | 0.908 | 0.642 | †   |
| 1383322_at   | Rasl11b    | RAS-like family 11 member B                                      | 837  | 2.225 | 2.693 | 1.804 | *#† |
| 1378484_at   | Rasl12     | RAS-like, family 12                                              | 156  | 0.485 | 0.606 | 0.952 | *#  |
| 1382749_at   | Rbm5       | RNA binding motif protein 5                                      | 500  | 0.663 | 0.764 | 0.738 | *#† |
| 1395523_at   | Rbmx       | RNA binding motif protein, X-linked                              | 282  | 0.598 | 0.647 | 0.896 | *#  |
| 1388686_at   | Rcan1      | Regulator of calcineurin 1                                       | 2232 | 1.387 | 1.507 | 0.973 | *#  |
| 1379714_at   | rCG_43687  | Hypothetical protein LOC688459                                   | 44   | 1.742 | 1.198 | 1.180 | *#† |
| 1381341_at   | rCG_43687  | Hypothetical protein LOC688459                                   | 104  | 4.858 | 1.905 | 1.618 | *#† |
| 1389607_at   | Rcor2      | REST corepressor 2                                               | 371  | 0.565 | 0.678 | 0.904 | *#  |
| 1382179_at   | Rdh14      | Retinol dehydrogenase 14 (all-trans/9-cis/11-cis)                | 257  | 0.619 | 0.728 | 0.953 | *#  |
| 1368238_at   | Reg3b      | Regenerating islet-derived 3 beta                                | 6909 | 0.960 | 0.916 | 0.477 | †   |
| 1371890_at   | Rere       | Arginine-glutamic acid dipeptide (RE) repeats                    | 1611 | 0.611 | 0.619 | 0.837 | *#† |
| 1390812_a_at | Rerg       | RAS-like, estrogen-regulated, growth-inhibitor                   | 365  | 0.810 | 0.838 | 1.511 | *#† |
| 1372266_at   | Rev3l      | REV3-like, catalytic subunit of DNA polymerase zeta (yeast)      | 183  | 0.734 | 0.533 | 0.880 | #   |
| 1368080_at   | Rgc32      | Response gene to complement 32                                   | 150  | 1.559 | 2.035 | 2.301 | *#† |
| 1378802_at   | RGD1303232 | Phytn_dehydro and Pyr_redox domain containing protein RGD1303232 | 123  | 0.875 | 0.788 | 0.651 | *#† |
| 1391817_at   | RGD1304595 | Similar to RIKEN cDNA 6330416G13 gene                            | 177  | 0.627 | 0.821 | 1.046 | *#  |
| 1375756_at   | RGD1305081 | Similar to ionized calcium binding adapter molecule 2 (Iba2)     | 406  | 1.133 | 1.612 | 1.138 | --- |
| 1392597_at   | RGD1305081 | Similar to ionized calcium binding adapter molecule 2 (Iba2)     | 1793 | 1.202 | 1.513 | 1.312 | #   |
| 1371438_at   | RGD1305422 | Similar to mKIAA0226 protein                                     | 477  | 1.630 | 1.976 | 1.261 | *#† |
| 1380619_at   | RGD1305537 | Similar to RIKEN cDNA 3110001I22                                 | 52   | 1.700 | 1.278 | 1.049 | *   |
| 1373321_at   | RGD1306622 | Similar to KIAA0954 protein                                      | 222  | 1.089 | 1.356 | 1.541 | #†  |
| 1382235_at   | RGD1306809 | Similar to hypothetical protein FLJ30596                         | 84   | 0.629 | 0.560 | 0.758 | *#† |
| 1377011_at   | RGD1307034 | Similar to hypothetical protein CG003                            | 430  | 0.821 | 0.814 | 1.717 | *#† |
| 1376645_at   | RGD1307396 | Similar to RIKEN cDNA 6330406I15                                 | 285  | 2.577 | 2.528 | 1.851 | *#† |
| 1395765_at   | RGD1307396 | Similar to RIKEN cDNA 6330406I15                                 | 81   | 2.164 | 1.897 | 1.391 | *#  |
| 1397848_at   | RGD1307396 | Similar to RIKEN cDNA 6330406I15                                 | 39   | 2.594 | 2.193 | 1.632 | *#† |
| 1389007_at   | RGD1307524 | Similar to Friedreich ataxia region gene X123                    | 500  | 1.500 | 1.818 | 1.316 | *#† |
| 1374278_at   | RGD1307696 | Similar to dJ881L2.2 (novel protein)                             | 380  | 0.878 | 0.660 | 0.661 | #†  |
| 1374067_at   | RGD1308127 | Similar to 2700078E11Rik protein                                 | 861  | 1.512 | 1.184 | 1.131 | *#† |
| 1383774_at   | RGD1308179 | Similar to RIKEN cDNA 2010316F05                                 | 96   | 0.620 | 0.686 | 1.048 | *#  |

|            |            |                                                                                |      |       |       |       |     |
|------------|------------|--------------------------------------------------------------------------------|------|-------|-------|-------|-----|
| 1379367_at | RGD1308251 | Similar to RIKEN cDNA 2810405K02                                               | 421  | 0.926 | 0.880 | 0.653 | †   |
| 1376104_at | RGD1308319 | Similar to KIAA0802 protein                                                    | 73   | 1.116 | 1.551 | 1.585 | #†  |
| 1376654_at | RGD1308448 | Similar to RIKEN cDNA B130016O10 gene                                          | 79   | 0.784 | 0.461 | 0.595 | #†  |
| 1390937_at | RGD1309051 | Similar to chromosome 14 open reading frame 50                                 | 194  | 0.945 | 0.989 | 1.546 | †   |
| 1383726_at | RGD1309360 | Hypothetical LOC294715                                                         | 59   | 1.572 | 1.645 | 1.406 | *#† |
| 1373262_at | RGD1309543 | Similar to 2310014H01Rik protein                                               | 419  | 1.581 | 1.687 | 1.194 | *#† |
| 1388824_at | RGD1309707 | Similar to RIKEN cDNA 4930431E10                                               | 234  | 1.298 | 1.573 | 1.268 | *#† |
| 1392802_at | RGD1309707 | Similar to RIKEN cDNA 4930431E10                                               | 112  | 1.248 | 1.520 | 1.128 | #   |
| 1372848_at | RGD1310269 | Hypothetical LOC314472                                                         | 431  | 0.840 | 0.760 | 0.563 | *#† |
| 1373596_at | RGD1310423 | Similar to hypothetical protein FLJ31737                                       | 272  | 0.748 | 0.639 | 1.233 | *#  |
| 1372805_at | RGD1310444 | LOC363015                                                                      | 209  | 0.950 | 1.330 | 1.685 | #†  |
| 1393015_at | RGD1310587 | Similar to hypothetical protein FLJ14146                                       | 239  | 0.996 | 0.927 | 0.667 | †   |
| 1377250_at | RGD1310799 | Similar to RIKEN cDNA A930008G19                                               | 130  | 0.620 | 0.811 | 0.780 | *   |
| 1382813_at | RGD1310810 | Similar to RIKEN cDNA 4930444A02                                               | 310  | 0.656 | 0.624 | 0.967 | *#  |
| 1388945_at | RGD1311307 | Similar to 1300014I06Rik protein                                               | 212  | 2.861 | 2.650 | 1.653 | *#† |
| 1375997_at | RGD1311756 | Similar to hypothetical protein FLJ20950                                       | 254  | 0.896 | 0.762 | 0.659 | #†  |
| 1390232_at | RGD1311946 | Similar to RIKEN cDNA 1810055G02                                               | 336  | 1.241 | 1.536 | 1.374 | *#† |
| 1390928_at | RGD1559612 | Similar to tigger transposable element derived 2                               | 140  | 0.413 | 0.719 | 0.818 | *#† |
| 1393004_at | RGD1559864 | Similar to mKIAA1045 protein                                                   | 106  | 1.340 | 2.029 | 1.270 | #   |
| 1372403_at | RGD1560011 | Similar to Nuclear membrane binding protein NUCLING                            | 408  | 1.495 | 1.546 | 1.101 | *#  |
| 1367495_at | RGD1560211 | Similar to prefoldin 4                                                         | 491  | 1.353 | 1.503 | 1.404 | *#† |
| 1377674_at | RGD1560612 | Similar to PHF21A protein                                                      | 207  | 0.585 | 0.626 | 0.900 | *#  |
| 1383001_at | RGD1560812 | RGD1560812                                                                     | 106  | 1.696 | 1.276 | 0.948 | *#  |
| 1383874_at | RGD1560812 | RGD1560812                                                                     | 157  | 3.044 | 1.584 | 1.126 | *#  |
| 1394278_at | RGD1560812 | RGD1560812                                                                     | 184  | 1.838 | 1.430 | 1.063 | *#  |
| 1374874_at | RGD1561042 | Similar to RIKEN cDNA 5730509K17 gene                                          | 113  | 0.590 | 0.703 | 1.043 | *#  |
| 1373485_at | RGD1561238 | Similar to ring finger protein 122 homolog                                     | 330  | 0.608 | 0.597 | 0.880 | *#  |
| 1372293_at | RGD1562059 | Similar to RIKEN cDNA 1110038F21                                               | 3569 | 1.046 | 1.038 | 1.934 | †   |
| 1373049_at | RGD1562136 | Similar to D1Ert622e protein                                                   | 171  | 1.956 | 1.502 | 1.266 | *#† |
| 1377867_at | RGD1562284 | Similar to Glutaminyl-peptide cyclotransferase precursor (QC)                  | 227  | 1.041 | 0.972 | 1.586 | †   |
| 1383846_at | RGD1562846 | Similar to Docking protein 5 (Downstream of tyrosine kinase 5) (Protein dok-5) | 160  | 1.695 | 2.770 | 1.398 | *#† |
| 1396206_at | RGD1562846 | Similar to Docking protein 5 (Downstream of tyrosine kinase 5) (Protein dok-5) | 53   | 1.579 | 3.372 | 1.234 | *#  |
| 1383398_at | RGD1564327 | Similar to integrin alpha 8                                                    | 302  | 0.955 | 0.874 | 1.747 | †   |
| 1385354_at | RGD1564327 | Similar to integrin alpha 8                                                    | 143  | 0.907 | 0.907 | 1.647 | †   |
| 1373696_at | RGD1564859 | RGD1564859                                                                     | 229  | 0.716 | 0.620 | 0.717 | *#† |
| 1395064_at | RGD1564943 | Similar to 4930429A08Rik protein                                               | 187  | 0.615 | 0.888 | 0.989 | *   |
| 1376927_at | RGD1564978 | Similar to LOC432779 protein                                                   | 114  | 0.453 | 0.494 | 0.765 | *#  |
| 1389639_at | RGD1565350 | Similar to Shb protein                                                         | 511  | 1.185 | 1.827 | 1.324 | #   |
| 1391837_at | RGD1565705 | Similar to chr2 synaptotagmin                                                  | 479  | 1.158 | 1.379 | 1.555 | *#† |
| 1373248_at | RGD1565800 | Similar to hypothetical protein FLJ20674                                       | 350  | 1.065 | 1.205 | 1.500 | †   |
| 1376937_at | RGD1565927 | Similar to 4631422O05Rik protein                                               | 348  | 1.327 | 1.623 | 2.065 | *#† |
| 1380287_at | RGD1566107 | Similar to cAMP responsive element binding protein 5                           | 47   | 3.274 | 1.813 | 1.326 | *#  |
| 1371731_at | RGD1566215 | Similar to Coatomer gamma-2 subunit (Gamma-2 coat protein) (Gamma-2 COP)       | 1823 | 0.969 | 0.942 | 0.448 | †   |
| 1382436_at | RGD1566265 | Similar to RIKEN cDNA 2610002M06                                               | 95   | 1.017 | 1.075 | 1.518 | †   |
| 1394472_at | Rgl1       | Ral guanine nucleotide dissociation stimulator,-like 1                         | 372  | 0.725 | 0.651 | 0.753 | *#† |
| 1395145_at | Rgl1       | Ral guanine nucleotide dissociation stimulator,-like 1                         | 485  | 0.755 | 0.652 | 0.711 | *#† |
| 1368144_at | Rgs2       | Regulator of G-protein signaling 2                                             | 395  | 3.692 | 2.178 | 2.291 | *#† |
| 1387074_at | Rgs2       | Regulator of G-protein signaling 2                                             | 699  | 3.308 | 2.139 | 2.126 | *#† |
| 1368505_at | Rgs4       | Regulator of G-protein signaling 4                                             | 371  | 0.515 | 0.621 | 1.828 | *#† |
| 1368506_at | Rgs4       | Regulator of G-protein signaling 4                                             | 230  | 0.545 | 0.681 | 1.765 | *#† |
| 1389003_at | Rhobtb3    | Rho-related BTB domain containing 3                                            | 335  | 0.792 | 0.638 | 1.027 | *#  |
| 1387153_at | Ril        | Reversion induced LIM gene                                                     | 114  | 2.167 | 3.825 | 1.085 | *#  |

|              |          |                                                                                                                                             |      |        |        |       |     |
|--------------|----------|---------------------------------------------------------------------------------------------------------------------------------------------|------|--------|--------|-------|-----|
| 1375020_at   | Rin3     | Ras and Rab interactor 3                                                                                                                    | 160  | 0.943  | 1.610  | 1.175 | #   |
| 1381279_at   | Ripk2    | Receptor-interacting serine-threonine kinase 2                                                                                              | 232  | 2.481  | 1.548  | 1.570 | *#† |
| 1374545_at   | Rkhd2    | Ring finger and KH domain containing 2                                                                                                      | 667  | 1.578  | 1.711  | 1.174 | *#† |
| 1381533_at   | Rnd1     | Rho family GTPase 1                                                                                                                         | 292  | 5.204  | 3.848  | 1.255 | *#  |
| 1377663_at   | Rnd3     | Rho family GTPase 3                                                                                                                         | 455  | 1.481  | 1.712  | 1.272 | *#† |
| 1394077_at   | Rnd3     | Rho family GTPase 3                                                                                                                         | 577  | 1.379  | 1.555  | 1.447 | *#† |
| 1389525_at   | Rnf149   | Ring finger protein 149                                                                                                                     | 680  | 1.195  | 1.290  | 1.512 | *#† |
| 1384416_at   | Rnf168   | Ring finger protein 168                                                                                                                     | 87   | 0.652  | 0.804  | 0.904 | *#  |
| 1374311_at   | Rnf207   | Ring finger protein 207                                                                                                                     | 259  | 0.785  | 0.666  | 0.806 | *#† |
| 1387379_at   | Rock2    | Rho-associated coiled-coil containing protein kinase 2                                                                                      | 187  | 1.592  | 1.939  | 1.323 | *#† |
| 1393045_at   | Rock2    | Rho-associated coiled-coil containing protein kinase 2                                                                                      | 524  | 1.574  | 1.915  | 1.427 | *#† |
| 1393097_at   | Rprd1a   | Regulation of nuclear pre-mRNA domain containing 1A                                                                                         | 51   | 1.555  | 0.953  | 1.217 | *†  |
| 1372133_at   | Rras2    | Related RAS viral (r-ras) oncogene homolog 2                                                                                                | 1216 | 1.577  | 1.780  | 1.130 | *#  |
| 1382058_at   | Rras2    | Related RAS viral (r-ras) oncogene homolog 2                                                                                                | 1093 | 1.436  | 1.644  | 1.197 | *#  |
| 1388710_at   | Rreb1    | Ras responsive element binding protein 1                                                                                                    | 497  | 0.405  | 0.664  | 0.824 | *#  |
| 1372690_at   | Rtn4r1   | Reticulon 4 receptor-like 1                                                                                                                 | 90   | 0.814  | 0.659  | 0.890 | #   |
| 1393404_at   | Rtn4r1   | Reticulon 4 receptor-like 1                                                                                                                 | 106  | 0.610  | 0.412  | 0.636 | *#† |
| 1368914_at   | Runx1    | Runt related transcription factor 1                                                                                                         | 144  | 2.252  | 2.337  | 2.103 | *#† |
| 1370981_at   | Rxrg     | Retinoid X receptor gamma                                                                                                                   | 101  | 0.948  | 0.742  | 0.665 | #†  |
| 1386890_at   | S100a10  | S100 calcium binding protein A10                                                                                                            | 2469 | 1.639  | 1.824  | 1.295 | *#† |
| 1367661_at   | S100a6   | S100 calcium binding protein A6                                                                                                             | 4405 | 1.209  | 1.365  | 1.726 | *#† |
| 1371840_at   | S1pr1    | Sphingosine-1-phosphate receptor 1                                                                                                          | 1472 | 2.119  | 2.177  | 1.005 | *#  |
| 1376150_at   | S1pr3    | Sphingosine-1-phosphate receptor 3                                                                                                          | 723  | 1.217  | 1.535  | 0.589 | *#† |
| 1379358_at   | Samd4a   | Sterile alpha motif domain containing 4A                                                                                                    | 91   | 1.552  | 1.687  | 1.167 | *#† |
| 1398620_at   | Samd4a   | Sterile alpha motif domain containing 4A                                                                                                    | 162  | 1.813  | 2.027  | 1.177 | *#  |
| 1371774_at   | Sat1     | Spermidine/spermine N1-acetyl transferase 1                                                                                                 | 1623 | 1.543  | 1.501  | 1.089 | *#  |
| 1388462_at   | Sbk1     | SH3-binding domain kinase 1                                                                                                                 | 242  | 0.726  | 0.658  | 0.831 | *#  |
| 1384707_at   | Scara5   | Scavenger receptor class A, member 5 (putative)                                                                                             | 44   | 1.027  | 0.896  | 1.595 | †   |
| 1370355_at   | Scd1     | Stearoyl-Coenzyme A desaturase 1                                                                                                            | 840  | 0.855  | 0.791  | 1.920 | #†  |
| 1389367_at   | Schip1   | Schwannomin interacting protein 1                                                                                                           | 699  | 1.129  | 1.549  | 1.458 | #†  |
| 1374524_at   | Scly     | Selenocysteine lyase                                                                                                                        | 346  | 0.669  | 0.574  | 0.729 | *#† |
| 1367849_at   | Sdc1     | Syndecan 1                                                                                                                                  | 356  | 3.281  | 4.200  | 1.203 | *#† |
| 1376062_at   | Sdc1     | Syndecan 1                                                                                                                                  | 90   | 2.109  | 2.978  | 1.064 | *#  |
| 1370166_at   | Sdc2     | Syndecan 2                                                                                                                                  | 594  | 1.096  | 1.277  | 1.520 | #†  |
| 1382189_at   | Sdc2     | Syndecan 2                                                                                                                                  | 569  | 1.125  | 1.248  | 1.507 | #†  |
| 1367721_at   | Sdc4     | Syndecan 4                                                                                                                                  | 1495 | 2.127  | 2.138  | 1.200 | *#† |
| 1376319_at   | Sema3c   | Sema domain, immunoglobulin domain (Ig), short basic domain, secreted, (semaphorin) 3C                                                      | 768  | 1.297  | 1.702  | 2.664 | †   |
| 1390437_at   | Sema5a   | Sema domain, seven thrombospondin repeats (type 1 and type 1-like), transmembrane domain (TM) and short cytoplasmic domain, (semaphorin) 5A | 248  | 0.801  | 0.645  | 1.132 | *#  |
| 1389353_at   | Sema6d   | Sema domain, transmembrane domain (TM), and cytoplasmic domain, (semaphorin) 6D                                                             | 320  | 0.754  | 0.758  | 0.560 | #†  |
| 1394086_at   | Senp7    | SUMO1/sentrin specific protease 7                                                                                                           | 108  | 0.534  | 0.510  | 0.760 | *#  |
| 1368806_at   | Sepp1    | Selenoprotein P, plasma, 1                                                                                                                  | 1811 | 0.852  | 0.797  | 0.649 | #†  |
| 1398986_at   | Serinc3  | Serine incorporator 3                                                                                                                       | 1821 | 1.206  | 1.271  | 1.525 | *#† |
| 1368487_at   | Serpinb2 | Serine (or cysteine) peptidase inhibitor, clade B, member 2                                                                                 | 30   | 43.389 | 14.690 | 0.950 | *#  |
| 1368519_at   | Serpine1 | Serine (or cysteine) peptidase inhibitor, clade E, member 1                                                                                 | 190  | 13.378 | 10.548 | 6.810 | *#† |
| 1392264_s_at | Serpine1 | Serine (or cysteine) peptidase inhibitor, clade E, member 1                                                                                 | 171  | 10.470 | 7.299  | 4.116 | *#† |
| 1372254_at   | Serping1 | Serine (or cysteine) peptidase inhibitor, clade G, member 1                                                                                 | 2654 | 0.936  | 0.885  | 0.622 | †   |
| 1372417_at   | Sertad1  | SERTA domain containing 1                                                                                                                   | 579  | 1.961  | 1.467  | 0.987 | *#  |
| 1375279_at   | Sertad2  | SERTA domain containing 2                                                                                                                   | 499  | 1.861  | 1.454  | 1.030 | *#† |
| 1391537_at   | Sertad4  | SERTA domain containing 4                                                                                                                   | 484  | 0.424  | 0.743  | 1.570 | *#† |
| 1372248_at   | Sesn1    | Sestrin 1                                                                                                                                   | 314  | 0.451  | 0.509  | 0.731 | *#† |

|              |          |                                                                                               |      |       |       |       |     |
|--------------|----------|-----------------------------------------------------------------------------------------------|------|-------|-------|-------|-----|
| 1395809_at   | Sesn1    | Sestrin 1                                                                                     | 148  | 0.609 | 0.711 | 0.759 | *#  |
| 1396614_at   | Sfrp2    | Secreted frizzled-related protein 2                                                           | 639  | 0.955 | 1.074 | 0.637 | †   |
| 1367723_a_at | Sh2b3    | SH2B adaptor protein 3                                                                        | 407  | 1.222 | 1.522 | 0.931 | *#  |
| 1389203_at   | Sh3bp5l  | SH3 binding domain protein 5 like                                                             | 296  | 2.159 | 1.923 | 1.158 | *#  |
| 1370419_a_at | Sh3kbp1  | SH3-domain kinase binding protein 1                                                           | 1799 | 0.928 | 0.880 | 0.509 | #†  |
| 1387957_a_at | Sh3kbp1  | SH3-domain kinase binding protein 1                                                           | 2582 | 0.901 | 0.863 | 0.549 | #†  |
| 1387408_at   | Siah2    | Seven in absentia 2                                                                           | 143  | 1.612 | 1.539 | 1.164 | *#  |
| 1391498_at   | Sin3a    | SIN3 homolog A, transcription regulator (yeast)                                               | 193  | 0.656 | 0.647 | 0.918 | *#  |
| 1384037_at   | Sipa1l2  | Signal-induced proliferation-associated 1 like 2                                              | 207  | 0.932 | 1.532 | 1.195 | #   |
| 1367853_at   | Slc12a2  | Solute carrier family 12 (sodium/potassium/chloride transporters), member 2                   | 407  | 1.547 | 1.505 | 1.251 | *#  |
| 1368565_at   | Slc1a3   | Solute carrier family 1 (glial high affinity glutamate transporter), member 3                 | 295  | 0.853 | 1.187 | 1.628 | †   |
| 1370314_at   | Slc20a1  | Solute carrier family 20 (phosphate transporter), member 1                                    | 1291 | 1.520 | 1.427 | 1.218 | *#† |
| 1376165_at   | Slc24a3  | Solute carrier family 24 (sodium/potassium/calcium exchanger), member 3                       | 114  | 1.002 | 1.063 | 1.654 | †   |
| 1398295_at   | Slc29a1  | Solute carrier family 29 (nucleoside transporters), member 1                                  | 235  | 0.863 | 0.980 | 1.762 | *†  |
| 1387585_at   | Slc29a2  | Solute carrier family 29 (nucleoside transporters), member 2                                  | 130  | 1.212 | 1.507 | 1.148 | #   |
| 1372326_at   | Slc2a3   | Solute carrier family 2 (facilitated glucose transporter), member 3                           | 96   | 1.881 | 2.333 | 1.514 | *#† |
| 1387707_at   | Slc2a3   | Solute carrier family 2 (facilitated glucose transporter), member 3                           | 70   | 1.650 | 1.940 | 1.188 | *#  |
| 1367989_at   | Slc2a4   | Solute carrier family 2 (facilitated glucose transporter), member 4                           | 342  | 0.799 | 0.624 | 0.871 | *#  |
| 1369099_at   | Slc30a1  | Solute carrier family 30 (zinc transporter), member 1                                         | 159  | 1.515 | 0.926 | 1.053 | *   |
| 1387942_at   | Slc35e4  | Solute carrier family 35, member E4                                                           | 217  | 1.585 | 2.003 | 1.209 | *#  |
| 1382076_at   | Slc37a1  | Solute carrier family 37 (glycerol-3-phosphate transporter), member 1                         | 144  | 1.163 | 1.994 | 1.184 | #   |
| 1370286_at   | Slc38a2  | Solute carrier family 38, member 2                                                            | 1889 | 0.649 | 0.826 | 1.087 | *#  |
| 1369074_at   | Slc38a4  | Solute carrier family 38, member 4                                                            | 130  | 0.992 | 0.945 | 1.787 | †   |
| 1390412_at   | Slc40a1  | Solute carrier family 39 (iron-regulated transporter), member 1                               | 227  | 0.829 | 0.666 | 0.888 | #   |
| 1379805_at   | Slc41a2  | Solute carrier family 41, member 2                                                            | 189  | 1.617 | 1.807 | 1.144 | *#  |
| 1384934_at   | Slc41a2  | Solute carrier family 41, member 2                                                            | 400  | 1.449 | 1.861 | 1.158 | *#  |
| 1384302_at   | Slc6a17  | Solute carrier family 6 (neurotransmitter transporter), member 17                             | 405  | 0.777 | 0.597 | 0.547 | #†  |
| 1368391_at   | Slc7a1   | Solute carrier family 7 (cationic amino acid transporter, y+ system), member 1                | 588  | 1.664 | 1.448 | 1.357 | *#† |
| 1368392_at   | Slc7a1   | Solute carrier family 7 (cationic amino acid transporter, y+ system), member 1                | 511  | 1.570 | 1.528 | 1.225 | *#† |
| 1387167_at   | Slc7a1   | Solute carrier family 7 (cationic amino acid transporter, y+ system), member 1                | 68   | 1.295 | 1.617 | 1.385 | #   |
| 1368582_at   | Slc7a3   | Solute carrier family 7 (cationic amino acid transporter, y+ system), member 3                | 270  | 1.038 | 1.027 | 1.799 | †   |
| 1368296_at   | Slco2b1  | Solute carrier organic anion transporter family, member 2b1                                   | 70   | 1.016 | 0.993 | 0.662 | --- |
| 1377916_at   | Slfm2    | Schlafen 2                                                                                    | 534  | 1.713 | 1.361 | 0.911 | *#  |
| 1369528_at   | Smad3    | SMAD family member 3                                                                          | 71   | 1.253 | 1.578 | 1.022 | #   |
| 1394025_at   | Smad6    | SMAD family member 6                                                                          | 200  | 0.434 | 0.944 | 0.905 | *   |
| 1390350_at   | Smap2    | Small ArfGAP2                                                                                 | 180  | 1.216 | 1.507 | 1.044 | #   |
| 1373706_at   | Smarcal1 | Swi/SNF related matrix associated, actin dependent regulator of chromatin, subfamily a-like 1 | 207  | 0.625 | 0.727 | 0.779 | *#† |
| 1392965_a_at | Smoc2    | SPARC related modular calcium binding 2                                                       | 375  | 0.938 | 1.042 | 0.611 | †   |
| 1377695_at   | Smtnl2   | Smoothelin-like 2                                                                             | 225  | 0.729 | 0.572 | 0.732 | *#† |
| 1373865_at   | Snap91   | Synaptosomal-associated protein 91                                                            | 519  | 0.978 | 1.112 | 2.570 | †   |
| 1381205_at   | Snapc5   | Small nuclear RNA activating complex, polypeptide 5                                           | 78   | 0.641 | 0.821 | 1.163 | *   |
| 1380250_at   | Sned1    | Sushi, nidogen and EGF-like domains 1                                                         | 379  | 0.946 | 0.846 | 0.203 | †   |
| 1368596_at   | Snf1lk   | SNF1-like kinase                                                                              | 328  | 2.387 | 1.889 | 1.189 | *#  |
| 1368597_at   | Snf1lk   | SNF1-like kinase                                                                              | 97   | 2.181 | 1.958 | 1.029 | *#  |
| 1370898_at   | Snn      | Stannin                                                                                       | 473  | 1.087 | 0.973 | 0.653 | †   |
| 1371066_at   | Snrk     | SNF related kinase                                                                            | 239  | 0.651 | 0.897 | 0.760 | *†  |
| 1386762_at   | Snx18    | Sorting nexin 18                                                                              | 153  | 1.341 | 1.515 | 1.087 | *#  |
| 1373239_at   | Snx33    | Sorting nexin 33                                                                              | 663  | 0.569 | 0.661 | 0.831 | *#† |
| 1383742_at   | Snx7     | Sorting nexin 7                                                                               | 327  | 1.510 | 1.725 | 1.160 | *#† |
| 1379271_at   | Socs5    | Suppressor of cytokine signaling 5                                                            | 1273 | 1.576 | 1.406 | 1.478 | *#† |
| 1390555_at   | Socs5    | Suppressor of cytokine signaling 5                                                            | 1114 | 1.676 | 1.709 | 1.432 | *#† |



|              |              |                                                                                   |      |       |       |       |     |
|--------------|--------------|-----------------------------------------------------------------------------------|------|-------|-------|-------|-----|
| 1387275_at   | Sox11        | SRY (sex determining region Y)-box 11                                             | 45   | 2.450 | 2.395 | 1.405 | *#† |
| 1381971_at   | Sox18        | SRY (sex determining region Y)-box 18                                             | 442  | 0.842 | 0.959 | 0.454 | †   |
| 1373860_at   | Sox4         | SRY (sex determining region Y)-box 4                                              | 1007 | 0.406 | 0.568 | 0.757 | *#† |
| 1375123_at   | Sox4         | SRY (sex determining region Y)-box 4                                              | 686  | 0.339 | 0.518 | 0.741 | *#† |
| 1383137_at   | Sox4         | SRY (sex determining region Y)-box 4                                              | 1647 | 0.433 | 0.551 | 0.858 | *#  |
| 1384000_at   | Sox4         | SRY (sex determining region Y)-box 4                                              | 187  | 0.525 | 0.679 | 0.882 | *   |
| 1382020_at   | Spag9        | Sperm associated antigen 9                                                        | 91   | 1.622 | 1.026 | 1.459 | *   |
| 1397618_at   | Spag9        | Sperm associated antigen 9                                                        | 259  | 1.224 | 1.522 | 1.293 | #   |
| 1386865_at   | Sparcl1      | SPARC-like 1 (hevin)                                                              | 424  | 0.943 | 0.868 | 0.514 | †   |
| 1368254_a_at | Sphk1        | Sphingosine kinase 1                                                              | 1025 | 1.713 | 1.505 | 0.707 | *#† |
| 1374168_at   | Sphkap       | SPHK1 interactor, AKAP domain containing                                          | 701  | 0.750 | 0.498 | 0.447 | *#† |
| 1396081_at   | Spire1       | Spire homolog 1 (Drosophila)                                                      | 106  | 1.342 | 1.706 | 1.092 | *#  |
| 1398601_at   | Spire1       | Spire homolog 1 (Drosophila)                                                      | 180  | 1.461 | 1.898 | 1.258 | *#  |
| 1370847_at   | Spon2        | Spondin 2, extracellular matrix protein                                           | 575  | 0.962 | 0.945 | 0.548 | †   |
| 1379380_at   | Spry1        | Sprouty homolog 1, antagonist of FGF signaling (Drosophila)                       | 388  | 0.792 | 1.053 | 1.835 | †   |
| 1374864_at   | Spry2        | Sprouty homolog 2 (Drosophila)                                                    | 401  | 2.025 | 1.617 | 1.328 | *#† |
| 1373018_at   | Spryd3       | SPRY domain containing 3                                                          | 349  | 1.350 | 1.548 | 1.245 | *#† |
| 1371104_at   | Srebf1       | Sterol regulatory element binding transcription factor 1                          | 475  | 0.633 | 0.546 | 1.078 | *#  |
| 1388426_at   | Srebf1       | Sterol regulatory element binding transcription factor 1                          | 812  | 0.666 | 0.551 | 1.043 | *#  |
| 1374829_at   | Srf          | Serum response factor (c-fos serum response element-binding transcription factor) | 203  | 1.597 | 1.277 | 1.018 | *#  |
| 1388842_at   | Srf          | Serum response factor (c-fos serum response element-binding transcription factor) | 1199 | 1.756 | 1.506 | 1.003 | *#  |
| 1395378_at   | Srf          | Serum response factor (c-fos serum response element-binding transcription factor) | 97   | 1.768 | 1.557 | 1.046 | *#  |
| 1370228_at   | Srprb /// Tf | Signal recognition particle receptor, B subunit /// transferrin                   | 91   | 1.011 | 0.972 | 0.605 | †   |
| 1373000_at   | Srpx2        | Sushi-repeat-containing protein, X-linked 2                                       | 446  | 1.136 | 1.377 | 2.677 | †   |
| 1372510_at   | Srxn1        | Sulfiredoxin 1 homolog (S. cerevisiae)                                            | 437  | 2.588 | 1.114 | 1.208 | *†  |
| 1384331_at   | Srxn1        | Sulfiredoxin 1 homolog (S. cerevisiae)                                            | 275  | 2.730 | 1.151 | 1.086 | *   |
| 1377595_at   | Ssfa2        | Sperm specific antigen 2                                                          | 466  | 1.586 | 1.079 | 0.885 | *   |
| 1369732_a_at | St3gal2      | ST3 beta-galactoside alpha-2,3-sialyltransferase 2                                | 890  | 1.063 | 1.335 | 1.583 | #†  |
| 1373288_at   | St5          | Suppression of tumorigenicity 5                                                   | 292  | 0.658 | 0.873 | 1.276 | *#† |
| 1387174_a_at | Star         | Steroidogenic acute regulatory protein                                            | 53   | 1.078 | 1.072 | 1.631 | †   |
| 1391871_at   | Stard13      | StAR-related lipid transfer (START) domain containing 13                          | 238  | 2.585 | 1.470 | 1.087 | *#  |
| 1393183_at   | Stard5       | StAR-related lipid transfer (START) domain containing 5                           | 212  | 1.508 | 1.537 | 0.854 | *#  |
| 1368835_at   | Stat1        | Signal transducer and activator of transcription 1                                | 639  | 0.743 | 0.610 | 0.784 | *#† |
| 1372757_at   | Stat1        | Signal transducer and activator of transcription 1                                | 481  | 0.804 | 0.603 | 0.970 | *#  |
| 1373670_at   | Stat2        | Signal transducer and activator of transcription 2                                | 318  | 0.716 | 0.592 | 0.868 | *#  |
| 1396101_at   | Stc1         | Stanniocalcin 1                                                                   | 396  | 1.291 | 1.308 | 1.628 | †   |
| 1393706_at   | Steap1       | Six transmembrane epithelial antigen of the prostate 1                            | 332  | 1.346 | 1.563 | 1.523 | *#† |
| 1372955_at   | Stk38l       | Serine/threonine kinase 38 like                                                   | 406  | 1.772 | 2.288 | 1.752 | #   |
| 1371943_at   | Stk40        | Serine/threonine kinase 40                                                        | 165  | 1.537 | 1.325 | 1.075 | *#  |
| 1379732_at   | Stx11        | Syntaxin 11                                                                       | 186  | 1.780 | 1.506 | 1.419 | *#† |
| 1390489_at   | Syncrip      | Synaptotagmin binding, cytoplasmic RNA interacting protein                        | 350  | 1.524 | 1.407 | 1.129 | *#† |
| 1371679_at   | Synpo2       | Synaptopodin 2                                                                    | 1773 | 1.474 | 1.840 | 1.301 | #   |
| 1384160_at   | Synpo2       | Synaptopodin 2                                                                    | 831  | 1.507 | 1.986 | 1.279 | #   |
| 1390107_at   | Sytl2        | Synaptotagmin-like 2                                                              | 162  | 0.931 | 1.373 | 2.020 | †   |
| 1387138_at   | Tac2         | Tachykinin 2                                                                      | 187  | 1.002 | 0.952 | 0.480 | †   |
| 1367570_at   | Tagln        | Transgelin                                                                        | 2097 | 1.530 | 1.743 | 4.374 | †   |
| 1388679_at   | Tbc1d14      | TBC1 domain family, member 14                                                     | 501  | 0.579 | 0.619 | 0.643 | *#† |
| 1377139_at   | Tbx5         | T-box 5                                                                           | 110  | 0.550 | 0.866 | 1.000 | *   |
| 1388782_at   | Tcf21        | Transcription factor 21                                                           | 887  | 0.591 | 0.671 | 0.970 | *#  |
| 1379914_at   | Tcfcp2l2     | Transcription factor CP2-like 2                                                   | 111  | 0.669 | 0.559 | 0.833 | *#  |
| 1367765_at   | Tcn2         | Transcobalamin 2                                                                  | 1343 | 0.964 | 0.930 | 0.666 | †   |
| 1390819_at   | Tef          | Thyrotrophic embryonic factor                                                     | 447  | 0.719 | 0.613 | 0.885 | *#  |

|              |               |                                                                        |      |       |       |       |     |
|--------------|---------------|------------------------------------------------------------------------|------|-------|-------|-------|-----|
| 1371356_at   | Tenc1         | Tensin like C1 domain containing phosphatase (tensin 2)                | 419  | 0.661 | 0.874 | 0.970 | *   |
| 1383401_at   | Tes           | Testis derived transcript                                              | 305  | 2.047 | 2.488 | 1.939 | *#† |
| 1389409_at   | Tes           | Testis derived transcript                                              | 96   | 2.368 | 3.220 | 1.599 | *#† |
| 1385174_at   | Tessp6        | Testis-specific serine protease-6                                      | 63   | 0.993 | 1.061 | 1.536 | †   |
| 1377340_at   | Tfpi2         | Tissue factor pathway inhibitor 2                                      | 33   | 2.154 | 1.657 | 1.157 | *#  |
| 1376425_at   | Tgfb2         | Transforming growth factor, beta 2                                     | 614  | 1.289 | 1.793 | 1.590 | --- |
| 1387172_a_at | Tgfb2         | Transforming growth factor, beta 2                                     | 709  | 1.534 | 2.172 | 1.451 | #   |
| 1388011_a_at | Tgfb2         | Transforming growth factor, beta 2                                     | 579  | 1.415 | 2.146 | 1.455 | #   |
| 1392382_at   | Tgfb2         | Transforming growth factor, beta 2                                     | 87   | 1.361 | 1.914 | 1.391 | #   |
| 1367859_at   | Tgfb3         | Transforming growth factor, beta 3                                     | 530  | 1.979 | 2.406 | 2.067 | *#† |
| 1371913_at   | Tgfb3         | Transforming growth factor, beta 3                                     | 507  | 0.995 | 1.709 | 1.348 | #   |
| 1369653_at   | Tgfb3         | Transforming growth factor, beta 3                                     | 532  | 0.887 | 0.937 | 0.613 | †   |
| 1383282_at   | Thap11        | THAP domain containing 11                                              | 403  | 0.655 | 0.814 | 1.018 | *#  |
| 1368900_at   | Thbd          | Thrombomodulin                                                         | 61   | 1.671 | 1.318 | 0.861 | *#  |
| 1368901_at   | Thbd          | Thrombomodulin                                                         | 55   | 1.844 | 1.310 | 0.778 | *#† |
| 1375951_at   | Thbd          | Thrombomodulin                                                         | 58   | 1.779 | 1.324 | 0.804 | *#† |
| 1388497_at   | Them2         | Thioesterase superfamily member 2                                      | 693  | 0.878 | 0.794 | 0.648 | *#† |
| 1369652_at   | Thy1          | Thy-1 cell surface antigen                                             | 78   | 1.064 | 0.957 | 1.630 | †   |
| 1389324_at   | Tie1          | Tyrosine kinase with immunoglobulin-like and EGF-like domains 1        | 210  | 0.994 | 0.968 | 0.661 | †   |
| 1367712_at   | Timp1         | TIMP metalloproteinase inhibitor 1                                     | 2610 | 1.481 | 1.594 | 1.487 | *#† |
| 1368989_at   | Timp3         | TIMP metalloproteinase inhibitor 3                                     | 209  | 2.290 | 2.907 | 1.549 | *#† |
| 1372926_at   | Timp3         | TIMP metalloproteinase inhibitor 3                                     | 144  | 2.764 | 3.097 | 1.647 | *#† |
| 1375138_at   | Timp3         | TIMP metalloproteinase inhibitor 3                                     | 549  | 2.129 | 2.392 | 1.793 | *#† |
| 1389836_a_at | Timp3         | TIMP metalloproteinase inhibitor 3                                     | 1148 | 2.104 | 2.331 | 1.200 | *#† |
| 1367650_at   | Tinagl1       | Tubulointerstitial nephritis antigen-like 1                            | 336  | 1.020 | 1.173 | 1.793 | †   |
| 1370940_at   | Tjp2          | Tight junction protein 2                                               | 215  | 2.002 | 2.144 | 1.190 | *#† |
| 1387495_at   | Tle4          | Transducin-like enhancer of split 4 (E(sp1) homolog, Drosophila)       | 65   | 1.597 | 1.059 | 0.930 | *   |
| 1384319_at   | Tlk2          | Tousled-like kinase 2                                                  | 68   | 1.878 | 1.249 | 1.143 | *   |
| 1392280_at   | Tlr2          | Toll-like receptor 2                                                   | 287  | 0.803 | 0.865 | 0.580 | *†  |
| 1390832_at   | Tmcc3         | Transmembrane and coiled-coil domain family 3                          | 284  | 0.351 | 0.453 | 1.183 | *#† |
| 1393822_at   | Tmcc3         | Transmembrane and coiled-coil domain family 3                          | 97   | 0.498 | 0.625 | 1.266 | *#† |
| 1387850_at   | Tmeff1        | Transmembrane protein with EGF-like and two follistatin-like domains 1 | 197  | 1.154 | 1.633 | 1.037 | #   |
| 1390042_at   | Tmem140       | Transmembrane protein 140                                              | 186  | 0.699 | 0.622 | 0.619 | *#† |
| 1373204_at   | Tmem176a      | Transmembrane protein 176A                                             | 994  | 0.928 | 0.916 | 0.368 | †   |
| 1368840_at   | Tmem176b      | Transmembrane protein 176B                                             | 2415 | 0.850 | 0.843 | 0.478 | †   |
| 1376106_at   | Tmem178       | Transmembrane protein 178                                              | 381  | 0.792 | 0.647 | 0.390 | #†  |
| 1376623_at   | Tmem204       | Transmembrane protein 204                                              | 157  | 0.763 | 1.045 | 1.547 | *†  |
| 1373595_at   | Tmem43        | Transmembrane protein 43                                               | 882  | 1.466 | 1.741 | 1.290 | *#† |
| 1383314_at   | Tmem51        | Transmembrane protein 51                                               | 431  | 0.514 | 0.945 | 1.363 | *†  |
| 1389583_at   | Tmem82        | Transmembrane protein 82                                               | 129  | 0.817 | 0.656 | 0.690 | #†  |
| 1373309_at   | Tmem86a       | Transmembrane protein 86A                                              | 132  | 0.809 | 0.660 | 0.943 | *#  |
| 1373401_at   | Tnc           | Tenascin C                                                             | 316  | 4.000 | 4.518 | 2.449 | *#† |
| 1371194_at   | Tnfaip6       | Tumor necrosis factor alpha induced protein 6                          | 209  | 2.825 | 0.721 | 0.861 | *   |
| 1369407_at   | Tnfrsf11b     | Tumor necrosis factor receptor superfamily, member 11b                 | 329  | 2.902 | 2.697 | 2.608 | *#† |
| 1371785_at   | Tnfrsf12a     | Tumor necrosis factor receptor superfamily, member 12a                 | 1296 | 2.954 | 3.418 | 1.887 | *#† |
| 1391190_at   | Tnrc6a        | Trinucleotide repeat containing 6a                                     | 388  | 0.883 | 1.032 | 1.531 | †   |
| 1376982_at   | Tnrc6b        | Trinucleotide repeat containing 6B                                     | 270  | 0.802 | 0.655 | 0.866 | #   |
| 1371361_at   | Tns1          | Tensin 1                                                               | 515  | 1.166 | 1.600 | 1.373 | #†  |
| 1385704_at   | Tns1          | Tensin 1                                                               | 394  | 1.042 | 1.560 | 1.338 | #†  |
| 1388145_at   | Tnxa /// Tnxb | Tenascin XA /// tenascin XB                                            | 230  | 0.927 | 0.827 | 0.295 | †   |
| 1378572_at   | Tollip        | Toll interacting protein                                               | 260  | 1.475 | 1.528 | 0.943 | *#  |
| 1380808_at   | Tollip        | Toll interacting protein                                               | 290  | 1.393 | 1.508 | 0.872 | *#  |

|              |         |                                                                    |      |       |       |       |     |
|--------------|---------|--------------------------------------------------------------------|------|-------|-------|-------|-----|
| 1379751_at   | Tox3    | TOX high mobility group box family member 3                        | 138  | 1.532 | 1.347 | 1.217 | *   |
| 1382579_at   | Tox3    | TOX high mobility group box family member 3                        | 173  | 1.756 | 1.558 | 1.511 | *#† |
| 1383981_at   | Tp53bp2 | Tumor protein p53 binding protein, 2                               | 69   | 0.792 | 0.666 | 0.870 | --- |
| 1370287_a_at | Tpm1    | Tropomyosin 1, alpha                                               | 1023 | 1.549 | 1.636 | 2.628 | *#† |
| 1372219_at   | Tpm2    | Tropomyosin 2                                                      | 2126 | 1.085 | 1.122 | 2.255 | †   |
| 1368838_at   | Tpm4    | Tropomyosin 4                                                      | 2240 | 1.294 | 1.496 | 1.637 | *#† |
| 1371653_at   | Tpm4    | Tropomyosin 4                                                      | 3603 | 1.250 | 1.403 | 1.639 | *#† |
| 1383321_at   | Tpst1   | Tyrosylprotein sulfotransferase 1                                  | 342  | 0.890 | 0.646 | 1.013 | #   |
| 1390077_at   | Tram1   | Translocation associated membrane protein 1                        | 101  | 1.575 | 1.193 | 1.708 | --- |
| 1370198_at   | Trdn    | Triadin                                                            | 150  | 0.982 | 0.988 | 0.630 | †   |
| 1371019_at   | Trib1   | Tribbles homolog 1 (Drosophila)                                    | 148  | 1.920 | 1.495 | 0.742 | *#† |
| 1385124_at   | Trib2   | Tribbles homolog 2 (Drosophila)                                    | 362  | 1.054 | 1.557 | 1.188 | #   |
| 1370694_at   | Trib3   | Tribbles homolog 3 (Drosophila)                                    | 375  | 0.638 | 0.658 | 1.402 | *#† |
| 1370695_s_at | Trib3   | Tribbles homolog 3 (Drosophila)                                    | 512  | 0.641 | 0.818 | 1.461 | *#† |
| 1385899_at   | Trim16  | Tripartite motif-containing 16                                     | 180  | 1.316 | 1.302 | 1.591 | *#† |
| 1373578_at   | Trim2   | Tripartite motif-containing 2                                      | 276  | 0.611 | 0.388 | 0.613 | *#† |
| 1375278_at   | Trim2   | Tripartite motif-containing 2                                      | 382  | 0.699 | 0.499 | 0.620 | *#† |
| 1397596_at   | Trim2   | Tripartite motif-containing 2                                      | 131  | 0.729 | 0.572 | 0.898 | *#  |
| 1385252_at   | Trim6   | Tripartite motif-containing 6                                      | 96   | 0.600 | 0.618 | 0.943 | *#† |
| 1377651_at   | Trio    | Triple functional domain (PTPRF interacting)                       | 164  | 1.520 | 1.901 | 1.255 | *#  |
| 1390709_at   | Trio    | Triple functional domain (PTPRF interacting)                       | 437  | 1.166 | 1.696 | 1.308 | *#† |
| 1392972_at   | Trio    | Triple functional domain (PTPRF interacting)                       | 583  | 1.325 | 1.934 | 1.142 | *#  |
| 1370139_a_at | Trpc6   | Transient receptor potential cation channel, subfamily C, member 6 | 38   | 1.587 | 1.979 | 2.730 | *#† |
| 1382171_at   | Tsc22d2 | TSC22 domain family, member 2                                      | 403  | 2.490 | 1.522 | 1.275 | *#  |
| 1371550_at   | Tsc22d4 | TSC22 domain family, member 4                                      | 1423 | 0.885 | 0.904 | 0.666 | *#† |
| 1377089_a_at | Tspan5  | Tetraspanin 5                                                      | 263  | 2.610 | 3.238 | 1.173 | *#  |
| 1380725_at   | Tspan5  | Tetraspanin 5                                                      | 86   | 3.007 | 4.244 | 1.393 | *#† |
| 1394316_a_at | Tspan5  | Tetraspanin 5                                                      | 183  | 2.365 | 2.844 | 1.245 | *#† |
| 1372286_at   | Tspan6  | Tetraspanin 6                                                      | 1677 | 1.022 | 1.071 | 1.538 | †   |
| 1371702_at   | Tspan7  | Tetraspanin 7                                                      | 1216 | 0.952 | 0.943 | 0.623 | †   |
| 1370881_at   | Tst     | Thiosulfate sulfurtransferase, mitochondrial                       | 594  | 0.941 | 0.896 | 0.657 | †   |
| 1392531_at   | Ttpal   | Tocopherol (alpha) transfer protein-like                           | 286  | 1.598 | 1.499 | 1.147 | *#  |
| 1371618_s_at | Tubb3   | Tubulin, beta 3                                                    | 208  | 0.890 | 0.841 | 1.935 | †   |
| 1376100_at   | Tubb6   | Tubulin, beta 6                                                    | 2257 | 1.624 | 1.804 | 1.207 | *#† |
| 1378165_at   | Twist1  | Twist homolog 1 (Drosophila)                                       | 162  | 2.603 | 1.754 | 1.455 | *#† |
| 1387750_at   | Twist1  | Twist homolog 1 (Drosophila)                                       | 82   | 2.203 | 1.708 | 1.185 | *#  |
| 1375221_at   | Txndc13 | Thioredoxin domain containing 13                                   | 2013 | 1.018 | 1.115 | 1.500 | †   |
| 1397194_at   | Txndc13 | Thioredoxin domain containing 13                                   | 235  | 1.093 | 1.360 | 1.515 | --- |
| 1379910_at   | Uap1    | UDP-N-actetylglucosamine pyrophosphorylase 1                       | 337  | 5.311 | 4.011 | 2.037 | *#† |
| 1388387_at   | Ubac1   | UBA domain containing 1                                            | 623  | 0.711 | 0.661 | 0.761 | *#† |
| 1379284_at   | Ubash3b | Ubiquitin associated and SH3 domain containing, B                  | 51   | 1.212 | 1.769 | 1.145 | #   |
| 1393126_at   | Ubt1    | Ubiquitin domain containing 1                                      | 422  | 1.272 | 1.576 | 1.108 | *#  |
| 1383945_at   | Uck2    | Uridine-cytidine kinase 2                                          | 427  | 1.573 | 1.927 | 1.507 | *#† |
| 1387975_at   | Ugcg    | UDP-glucose ceramide glucosyltransferase                           | 273  | 1.731 | 1.746 | 1.006 | *#  |
| 1367938_at   | Ugdh    | UDP-glucose dehydrogenase                                          | 1394 | 1.601 | 1.686 | 1.390 | *#† |
| 1375869_at   | Ulk1    | Unc-51 like kinase 1 (C. elegans)                                  | 424  | 0.708 | 0.498 | 0.861 | *#  |
| 1382402_at   | Ulk1    | Unc-51 like kinase 1 (C. elegans)                                  | 269  | 0.800 | 0.645 | 0.896 | *#  |
| 1369235_at   | Unc5b   | Unc-5 homolog B (C. elegans)                                       | 632  | 0.852 | 1.422 | 1.594 | #†  |
| 1370141_at   | Unknown | Unknown                                                            | 1195 | 1.566 | 1.489 | 1.087 | *#  |
| 1371450_at   | Unknown | Unknown                                                            | 123  | 1.340 | 1.527 | 1.240 | *#  |
| 1371595_at   | Unknown | Unknown                                                            | 1235 | 1.745 | 1.271 | 1.234 | *   |
| 1371699_at   | Unknown | Unknown                                                            | 547  | 1.728 | 2.342 | 1.277 | *#† |

|            |         |         |      |       |       |       |     |
|------------|---------|---------|------|-------|-------|-------|-----|
| 1371795_at | Unknown | Unknown | 542  | 0.680 | 0.635 | 0.854 | *#  |
| 1371864_at | Unknown | Unknown | 827  | 1.530 | 1.151 | 1.292 | *#† |
| 1371969_at | Unknown | Unknown | 1295 | 1.240 | 1.281 | 2.483 | *#† |
| 1372060_at | Unknown | Unknown | 198  | 0.516 | 0.643 | 0.893 | *#  |
| 1372095_at | Unknown | Unknown | 176  | 0.705 | 0.616 | 0.592 | *#† |
| 1372347_at | Unknown | Unknown | 831  | 1.245 | 1.455 | 1.639 | *#† |
| 1372371_at | Unknown | Unknown | 537  | 1.369 | 1.576 | 1.263 | *#† |
| 1372414_at | Unknown | Unknown | 620  | 0.585 | 0.822 | 0.924 | *#  |
| 1372479_at | Unknown | Unknown | 150  | 1.002 | 0.766 | 0.645 | #†  |
| 1372583_at | Unknown | Unknown | 179  | 0.758 | 0.884 | 2.892 | *†  |
| 1372681_at | Unknown | Unknown | 368  | 0.870 | 0.555 | 1.034 | #   |
| 1372696_at | Unknown | Unknown | 189  | 0.570 | 0.841 | 0.880 | *   |
| 1372722_at | Unknown | Unknown | 908  | 1.621 | 1.740 | 1.398 | *#† |
| 1372750_at | Unknown | Unknown | 140  | 6.918 | 4.951 | 4.013 | *#† |
| 1372761_at | Unknown | Unknown | 88   | 0.964 | 0.948 | 0.562 | †   |
| 1372889_at | Unknown | Unknown | 131  | 1.015 | 1.283 | 1.594 | †   |
| 1372957_at | Unknown | Unknown | 202  | 0.638 | 0.766 | 0.939 | *   |
| 1372964_at | Unknown | Unknown | 662  | 1.775 | 1.333 | 1.337 | *#† |
| 1373092_at | Unknown | Unknown | 1428 | 0.689 | 0.558 | 0.655 | *#† |
| 1373165_at | Unknown | Unknown | 101  | 0.777 | 0.628 | 1.090 | #   |
| 1373178_at | Unknown | Unknown | 441  | 0.517 | 0.417 | 0.509 | *#† |
| 1373298_at | Unknown | Unknown | 76   | 1.237 | 1.904 | 0.898 | *#  |
| 1373478_at | Unknown | Unknown | 105  | 0.747 | 0.611 | 0.773 | #   |
| 1373487_at | Unknown | Unknown | 501  | 0.945 | 0.843 | 0.643 | †   |
| 1373525_at | Unknown | Unknown | 229  | 1.821 | 1.287 | 1.155 | *#  |
| 1373558_at | Unknown | Unknown | 92   | 0.915 | 1.226 | 1.675 | †   |
| 1373624_at | Unknown | Unknown | 506  | 1.829 | 1.866 | 1.889 | *#† |
| 1373628_at | Unknown | Unknown | 255  | 1.174 | 1.124 | 5.775 | †   |
| 1373651_at | Unknown | Unknown | 138  | 1.496 | 1.802 | 1.561 | *#† |
| 1373680_at | Unknown | Unknown | 251  | 2.869 | 1.880 | 1.138 | *#  |
| 1373691_at | Unknown | Unknown | 163  | 0.665 | 0.691 | 0.822 | *#† |
| 1373699_at | Unknown | Unknown | 257  | 0.877 | 0.889 | 0.150 | †   |
| 1373751_at | Unknown | Unknown | 121  | 0.485 | 0.670 | 1.038 | *#  |
| 1373759_at | Unknown | Unknown | 27   | 2.536 | 1.047 | 1.076 | *   |
| 1373776_at | Unknown | Unknown | 150  | 0.577 | 0.826 | 1.164 | *   |
| 1374023_at | Unknown | Unknown | 289  | 0.627 | 0.807 | 0.958 | *#  |
| 1374030_at | Unknown | Unknown | 295  | 0.936 | 0.658 | 0.911 | #   |
| 1374038_at | Unknown | Unknown | 517  | 0.819 | 0.644 | 0.753 | *#† |
| 1374060_at | Unknown | Unknown | 688  | 0.636 | 0.870 | 1.037 | *   |
| 1374166_at | Unknown | Unknown | 383  | 1.514 | 1.815 | 1.149 | --- |
| 1374172_at | Unknown | Unknown | 100  | 0.788 | 0.878 | 3.307 | †   |
| 1374276_at | Unknown | Unknown | 182  | 1.535 | 2.185 | 1.337 | #   |
| 1374298_at | Unknown | Unknown | 82   | 0.698 | 0.543 | 0.648 | *#† |
| 1374325_at | Unknown | Unknown | 416  | 0.955 | 1.103 | 1.549 | †   |
| 1374350_at | Unknown | Unknown | 290  | 0.781 | 0.652 | 0.710 | *#† |
| 1374410_at | Unknown | Unknown | 80   | 1.234 | 1.706 | 1.541 | #†  |
| 1374493_at | Unknown | Unknown | 169  | 0.537 | 0.680 | 0.736 | *#† |
| 1374514_at | Unknown | Unknown | 349  | 1.533 | 0.949 | 0.922 | *   |
| 1374529_at | Unknown | Unknown | 3100 | 2.885 | 2.371 | 2.020 | *#† |
| 1374609_at | Unknown | Unknown | 493  | 1.365 | 1.646 | 1.192 | *#† |
| 1374610_at | Unknown | Unknown | 165  | 5.234 | 3.783 | 1.171 | *#  |
| 1374627_at | Unknown | Unknown | 152  | 0.535 | 0.755 | 0.835 | *#† |

|              |         |         |      |       |       |       |     |
|--------------|---------|---------|------|-------|-------|-------|-----|
| 1374685_at   | Unknown | Unknown | 343  | 0.783 | 0.647 | 0.993 | *#  |
| 1374702_at   | Unknown | Unknown | 540  | 1.701 | 1.663 | 1.363 | *#† |
| 1374710_at   | Unknown | Unknown | 1054 | 1.560 | 1.927 | 1.115 | *#  |
| 1374742_at   | Unknown | Unknown | 381  | 1.324 | 1.762 | 1.264 | *#† |
| 1374868_at   | Unknown | Unknown | 51   | 0.885 | 0.936 | 1.552 | †   |
| 1374893_at   | Unknown | Unknown | 469  | 1.437 | 1.626 | 1.260 | *#† |
| 1374934_at   | Unknown | Unknown | 161  | 0.928 | 0.754 | 0.368 | †   |
| 1375184_at   | Unknown | Unknown | 129  | 2.857 | 3.974 | 1.524 | *#† |
| 1375199_at   | Unknown | Unknown | 135  | 1.073 | 1.522 | 1.302 | #†  |
| 1375223_at   | Unknown | Unknown | 208  | 0.831 | 0.561 | 0.555 | #†  |
| 1375532_at   | Unknown | Unknown | 1079 | 0.656 | 0.964 | 0.797 | --- |
| 1375561_at   | Unknown | Unknown | 298  | 1.534 | 1.016 | 0.995 | *   |
| 1375658_at   | Unknown | Unknown | 850  | 0.612 | 0.706 | 0.863 | *#† |
| 1375667_at   | Unknown | Unknown | 113  | 0.653 | 0.752 | 0.776 | *#† |
| 1375886_at   | Unknown | Unknown | 121  | 0.580 | 0.643 | 0.934 | *#  |
| 1375925_at   | Unknown | Unknown | 144  | 1.404 | 2.130 | 1.278 | *#  |
| 1375986_at   | Unknown | Unknown | 56   | 1.506 | 1.407 | 1.101 | *#  |
| 1376045_at   | Unknown | Unknown | 782  | 0.912 | 0.937 | 1.522 | †   |
| 1376071_at   | Unknown | Unknown | 691  | 1.275 | 1.357 | 1.612 | *#† |
| 1376109_at   | Unknown | Unknown | 262  | 1.234 | 1.743 | 1.405 | *#† |
| 1376152_at   | Unknown | Unknown | 348  | 1.073 | 1.739 | 1.435 | #†  |
| 1376178_at   | Unknown | Unknown | 66   | 0.645 | 0.724 | 1.028 | *#  |
| 1376267_at   | Unknown | Unknown | 69   | 1.770 | 1.550 | 0.758 | --- |
| 1376282_at   | Unknown | Unknown | 550  | 1.207 | 1.837 | 1.749 | #†  |
| 1376435_at   | Unknown | Unknown | 80   | 1.865 | 2.882 | 1.089 | *#  |
| 1376513_a_at | Unknown | Unknown | 300  | 1.709 | 1.958 | 1.716 | *#† |
| 1376522_at   | Unknown | Unknown | 95   | 0.654 | 0.841 | 0.824 | *   |
| 1376574_at   | Unknown | Unknown | 639  | 1.022 | 1.021 | 0.596 | †   |
| 1376593_at   | Unknown | Unknown | 893  | 0.471 | 0.798 | 0.883 | *#† |
| 1376617_at   | Unknown | Unknown | 273  | 0.728 | 0.598 | 0.738 | *#† |
| 1376624_at   | Unknown | Unknown | 190  | 0.983 | 0.800 | 0.516 | †   |
| 1376672_at   | Unknown | Unknown | 212  | 0.455 | 0.553 | 0.838 | *#  |
| 1376734_at   | Unknown | Unknown | 298  | 1.104 | 1.247 | 2.894 | #†  |
| 1376848_at   | Unknown | Unknown | 304  | 2.335 | 2.127 | 1.469 | *#† |
| 1376869_at   | Unknown | Unknown | 223  | 1.654 | 1.097 | 0.994 | *   |
| 1376891_at   | Unknown | Unknown | 369  | 0.697 | 0.638 | 0.658 | *#† |
| 1376907_at   | Unknown | Unknown | 499  | 1.388 | 1.762 | 1.348 | *#† |
| 1376946_at   | Unknown | Unknown | 186  | 0.609 | 0.663 | 1.191 | *#  |
| 1377032_at   | Unknown | Unknown | 116  | 0.761 | 0.596 | 0.926 | *#  |
| 1377092_at   | Unknown | Unknown | 794  | 1.149 | 0.545 | 0.707 | #†  |
| 1377113_at   | Unknown | Unknown | 50   | 1.506 | 1.881 | 1.269 | *#† |
| 1377151_at   | Unknown | Unknown | 282  | 1.549 | 2.460 | 1.144 | *#  |
| 1377240_at   | Unknown | Unknown | 107  | 0.952 | 1.497 | 2.070 | #†  |
| 1377263_at   | Unknown | Unknown | 258  | 1.332 | 1.486 | 1.503 | *#† |
| 1377328_at   | Unknown | Unknown | 207  | 0.616 | 0.414 | 0.752 | *#† |
| 1377452_at   | Unknown | Unknown | 154  | 1.050 | 0.898 | 0.666 | †   |
| 1377517_at   | Unknown | Unknown | 81   | 0.665 | 0.745 | 1.043 | *#  |
| 1377673_at   | Unknown | Unknown | 244  | 0.809 | 0.697 | 0.658 | *#† |
| 1377705_at   | Unknown | Unknown | 1469 | 1.044 | 1.133 | 2.117 | †   |
| 1377706_x_at | Unknown | Unknown | 1283 | 1.031 | 1.124 | 2.371 | †   |
| 1377789_at   | Unknown | Unknown | 55   | 0.963 | 1.468 | 1.759 | #†  |
| 1377795_at   | Unknown | Unknown | 601  | 0.820 | 0.620 | 0.778 | *#† |

|              |         |         |      |       |       |       |     |
|--------------|---------|---------|------|-------|-------|-------|-----|
| 1377799_at   | Unknown | Unknown | 51   | 1.326 | 1.511 | 1.062 | *#  |
| 1377823_at   | Unknown | Unknown | 130  | 1.410 | 1.625 | 1.107 | *#  |
| 1377994_at   | Unknown | Unknown | 101  | 1.322 | 1.301 | 2.584 | †   |
| 1378009_at   | Unknown | Unknown | 220  | 1.229 | 1.250 | 1.508 | --- |
| 1378074_at   | Unknown | Unknown | 140  | 0.604 | 0.501 | 0.828 | *#† |
| 1378093_at   | Unknown | Unknown | 142  | 1.017 | 1.023 | 1.580 | †   |
| 1378098_at   | Unknown | Unknown | 330  | 1.511 | 1.528 | 1.206 | *#  |
| 1378109_at   | Unknown | Unknown | 111  | 0.850 | 0.641 | 0.744 | #   |
| 1378113_at   | Unknown | Unknown | 337  | 1.797 | 1.643 | 1.431 | *#† |
| 1378171_at   | Unknown | Unknown | 333  | 1.073 | 0.961 | 1.882 | †   |
| 1378205_at   | Unknown | Unknown | 157  | 1.026 | 0.852 | 0.644 | †   |
| 1378241_at   | Unknown | Unknown | 299  | 0.615 | 0.744 | 0.937 | *#  |
| 1378311_at   | Unknown | Unknown | 1070 | 1.385 | 1.560 | 1.038 | *#  |
| 1378413_at   | Unknown | Unknown | 541  | 0.749 | 0.552 | 0.590 | *#† |
| 1378447_at   | Unknown | Unknown | 35   | 2.969 | 1.424 | 1.190 | *#  |
| 1378467_at   | Unknown | Unknown | 89   | 1.041 | 1.301 | 1.540 | #†  |
| 1378556_at   | Unknown | Unknown | 555  | 1.149 | 1.193 | 2.273 | *#† |
| 1378754_at   | Unknown | Unknown | 119  | 3.666 | 3.112 | 1.307 | *#  |
| 1378808_at   | Unknown | Unknown | 153  | 0.350 | 0.466 | 0.886 | *#  |
| 1378927_at   | Unknown | Unknown | 570  | 0.610 | 0.494 | 0.911 | *#  |
| 1379089_at   | Unknown | Unknown | 92   | 1.515 | 1.367 | 1.444 | *#† |
| 1379236_at   | Unknown | Unknown | 133  | 1.062 | 1.506 | 1.058 | #   |
| 1379252_at   | Unknown | Unknown | 145  | 0.900 | 0.982 | 2.324 | †   |
| 1379310_at   | Unknown | Unknown | 127  | 1.532 | 1.426 | 1.288 | *#† |
| 1379534_at   | Unknown | Unknown | 137  | 0.751 | 0.525 | 0.754 | #   |
| 1379573_at   | Unknown | Unknown | 44   | 1.621 | 1.570 | 0.951 | *#  |
| 1379598_at   | Unknown | Unknown | 239  | 1.037 | 1.614 | 2.395 | #†  |
| 1379605_at   | Unknown | Unknown | 113  | 0.634 | 0.491 | 1.047 | *#  |
| 1379629_at   | Unknown | Unknown | 64   | 1.805 | 1.343 | 1.177 | *#† |
| 1379662_a_at | Unknown | Unknown | 677  | 0.644 | 0.861 | 0.806 | *†  |
| 1379666_at   | Unknown | Unknown | 155  | 1.701 | 1.170 | 1.313 | *†  |
| 1379739_at   | Unknown | Unknown | 151  | 1.739 | 1.068 | 1.096 | *   |
| 1379768_at   | Unknown | Unknown | 355  | 0.723 | 0.552 | 0.630 | *#† |
| 1379785_at   | Unknown | Unknown | 316  | 1.134 | 1.062 | 1.520 | †   |
| 1379799_at   | Unknown | Unknown | 292  | 0.526 | 0.776 | 2.249 | *†  |
| 1379912_at   | Unknown | Unknown | 81   | 1.686 | 1.188 | 1.239 | *#† |
| 1379934_at   | Unknown | Unknown | 168  | 1.219 | 1.835 | 1.039 | #   |
| 1379996_at   | Unknown | Unknown | 89   | 0.989 | 0.880 | 1.548 | †   |
| 1380057_at   | Unknown | Unknown | 357  | 0.743 | 0.472 | 0.765 | *#† |
| 1380143_at   | Unknown | Unknown | 195  | 1.576 | 1.345 | 1.306 | --- |
| 1380195_at   | Unknown | Unknown | 110  | 1.538 | 0.965 | 1.012 | *   |
| 1380306_at   | Unknown | Unknown | 45   | 1.577 | 1.023 | 0.972 | *   |
| 1380318_at   | Unknown | Unknown | 288  | 1.065 | 1.028 | 1.722 | †   |
| 1380376_at   | Unknown | Unknown | 89   | 0.786 | 0.654 | 1.020 | *#  |
| 1380410_at   | Unknown | Unknown | 357  | 1.309 | 1.180 | 1.870 | †   |
| 1380494_at   | Unknown | Unknown | 446  | 0.970 | 0.941 | 0.611 | †   |
| 1380544_at   | Unknown | Unknown | 335  | 1.171 | 1.430 | 1.643 | #†  |
| 1380741_at   | Unknown | Unknown | 238  | 0.822 | 0.644 | 1.119 | *#† |
| 1380831_at   | Unknown | Unknown | 82   | 1.640 | 1.915 | 1.521 | *#† |
| 1380855_at   | Unknown | Unknown | 282  | 0.665 | 0.972 | 0.898 | *   |
| 1381016_at   | Unknown | Unknown | 218  | 1.711 | 1.296 | 1.056 | *#  |
| 1381100_at   | Unknown | Unknown | 388  | 1.235 | 1.145 | 0.661 | †   |

|              |         |         |     |       |       |       |     |
|--------------|---------|---------|-----|-------|-------|-------|-----|
| 1381127_at   | Unknown | Unknown | 47  | 1.432 | 1.606 | 1.209 | *#  |
| 1381269_at   | Unknown | Unknown | 111 | 0.577 | 0.488 | 1.126 | *#  |
| 1381334_at   | Unknown | Unknown | 67  | 1.376 | 1.559 | 1.043 | *#  |
| 1381461_at   | Unknown | Unknown | 245 | 1.586 | 1.415 | 0.926 | *#  |
| 1382017_at   | Unknown | Unknown | 188 | 1.557 | 1.805 | 1.591 | *#† |
| 1382050_at   | Unknown | Unknown | 183 | 0.964 | 0.882 | 1.571 | †   |
| 1382054_at   | Unknown | Unknown | 112 | 1.513 | 1.655 | 2.564 | *#† |
| 1382108_at   | Unknown | Unknown | 249 | 0.490 | 0.383 | 0.460 | *#† |
| 1382199_at   | Unknown | Unknown | 493 | 0.599 | 0.836 | 0.891 | *   |
| 1382225_at   | Unknown | Unknown | 296 | 1.498 | 1.571 | 1.058 | *#  |
| 1382291_at   | Unknown | Unknown | 183 | 1.693 | 1.423 | 0.914 | *#  |
| 1382294_at   | Unknown | Unknown | 81  | 1.235 | 1.546 | 1.275 | #   |
| 1382296_at   | Unknown | Unknown | 117 | 0.734 | 0.661 | 1.498 | *#† |
| 1382375_at   | Unknown | Unknown | 263 | 0.851 | 0.884 | 0.660 | *†  |
| 1382431_at   | Unknown | Unknown | 388 | 0.607 | 0.501 | 0.714 | *#† |
| 1382438_at   | Unknown | Unknown | 69  | 0.729 | 0.512 | 0.677 | *#† |
| 1382482_at   | Unknown | Unknown | 144 | 1.240 | 1.560 | 0.906 | *#  |
| 1382512_at   | Unknown | Unknown | 319 | 1.482 | 1.708 | 1.479 | *#† |
| 1382567_at   | Unknown | Unknown | 145 | 1.406 | 1.519 | 1.455 | *#† |
| 1382599_at   | Unknown | Unknown | 702 | 0.738 | 0.635 | 0.636 | *#† |
| 1382603_at   | Unknown | Unknown | 81  | 1.506 | 1.243 | 0.744 | *#† |
| 1382631_at   | Unknown | Unknown | 93  | 1.279 | 1.707 | 1.432 | #   |
| 1382682_at   | Unknown | Unknown | 149 | 1.584 | 1.967 | 1.201 | *#  |
| 1382705_at   | Unknown | Unknown | 90  | 0.748 | 0.665 | 0.971 | --- |
| 1382746_s_at | Unknown | Unknown | 118 | 0.811 | 0.538 | 0.943 | *#  |
| 1382835_at   | Unknown | Unknown | 310 | 0.783 | 0.654 | 0.826 | #   |
| 1382882_x_at | Unknown | Unknown | 36  | 2.186 | 1.749 | 1.522 | *#† |
| 1382914_at   | Unknown | Unknown | 215 | 0.915 | 1.350 | 1.952 | #†  |
| 1382950_at   | Unknown | Unknown | 215 | 0.833 | 0.633 | 0.586 | #†  |
| 1382995_at   | Unknown | Unknown | 235 | 0.982 | 1.096 | 2.071 | †   |
| 1383058_at   | Unknown | Unknown | 875 | 0.560 | 0.545 | 0.971 | *#  |
| 1383063_a_at | Unknown | Unknown | 973 | 0.839 | 0.640 | 1.001 | #   |
| 1383169_at   | Unknown | Unknown | 654 | 0.395 | 0.355 | 0.378 | *#† |
| 1383173_at   | Unknown | Unknown | 608 | 0.817 | 0.608 | 0.914 | *#  |
| 1383185_at   | Unknown | Unknown | 59  | 1.104 | 1.542 | 1.417 | #†  |
| 1383194_a_at | Unknown | Unknown | 180 | 0.900 | 0.623 | 0.915 | #   |
| 1383210_at   | Unknown | Unknown | 66  | 3.094 | 2.399 | 1.261 | *#  |
| 1383222_at   | Unknown | Unknown | 391 | 2.626 | 1.691 | 1.133 | *#  |
| 1383228_at   | Unknown | Unknown | 144 | 1.062 | 1.512 | 1.013 | #   |
| 1383240_at   | Unknown | Unknown | 300 | 1.392 | 1.809 | 1.339 | *#† |
| 1383253_at   | Unknown | Unknown | 368 | 1.619 | 0.975 | 0.978 | *   |
| 1383299_at   | Unknown | Unknown | 262 | 1.383 | 2.128 | 1.660 | #†  |
| 1383353_at   | Unknown | Unknown | 323 | 1.864 | 1.891 | 2.001 | *#† |
| 1383486_at   | Unknown | Unknown | 187 | 7.522 | 6.700 | 5.937 | *#† |
| 1383527_at   | Unknown | Unknown | 42  | 1.718 | 1.666 | 0.877 | *#  |
| 1383533_at   | Unknown | Unknown | 265 | 0.627 | 0.793 | 0.968 | *#  |
| 1383557_at   | Unknown | Unknown | 146 | 1.471 | 1.354 | 1.879 | †   |
| 1383565_at   | Unknown | Unknown | 27  | 1.000 | 3.075 | 0.981 | #   |
| 1383589_at   | Unknown | Unknown | 520 | 0.477 | 0.537 | 0.797 | *#† |
| 1383632_at   | Unknown | Unknown | 311 | 1.692 | 0.911 | 0.969 | *   |
| 1383688_at   | Unknown | Unknown | 351 | 0.645 | 0.668 | 0.875 | *#  |
| 1383744_at   | Unknown | Unknown | 950 | 1.248 | 1.510 | 1.334 | *#† |

|            |         |         |      |       |       |       |     |
|------------|---------|---------|------|-------|-------|-------|-----|
| 1383757_at | Unknown | Unknown | 166  | 0.541 | 0.474 | 0.951 | *#  |
| 1383784_at | Unknown | Unknown | 152  | 0.763 | 0.652 | 0.846 | *#† |
| 1383852_at | Unknown | Unknown | 147  | 1.148 | 1.643 | 1.148 | #   |
| 1383939_at | Unknown | Unknown | 574  | 1.486 | 1.706 | 1.521 | *#† |
| 1383987_at | Unknown | Unknown | 272  | 1.484 | 1.726 | 1.400 | #   |
| 1384051_at | Unknown | Unknown | 208  | 1.263 | 1.999 | 3.875 | #†  |
| 1384081_at | Unknown | Unknown | 50   | 1.341 | 1.988 | 1.393 | #   |
| 1384135_at | Unknown | Unknown | 193  | 0.569 | 0.733 | 0.964 | *#  |
| 1384228_at | Unknown | Unknown | 193  | 1.495 | 1.387 | 1.525 | *#† |
| 1384286_at | Unknown | Unknown | 124  | 1.029 | 1.074 | 1.815 | †   |
| 1384449_at | Unknown | Unknown | 329  | 1.196 | 1.108 | 1.539 | †   |
| 1384508_at | Unknown | Unknown | 87   | 0.696 | 0.646 | 0.968 | *#  |
| 1384605_at | Unknown | Unknown | 581  | 1.203 | 1.599 | 1.314 | #†  |
| 1384709_at | Unknown | Unknown | 79   | 1.686 | 1.745 | 2.390 | *#† |
| 1384724_at | Unknown | Unknown | 269  | 0.802 | 0.653 | 1.292 | *#† |
| 1384743_at | Unknown | Unknown | 117  | 1.518 | 1.380 | 2.121 | *†  |
| 1384841_at | Unknown | Unknown | 202  | 0.630 | 0.379 | 0.395 | *#† |
| 1384882_at | Unknown | Unknown | 214  | 1.693 | 1.441 | 1.327 | *#† |
| 1384899_at | Unknown | Unknown | 113  | 1.795 | 1.032 | 1.222 | *   |
| 1384901_at | Unknown | Unknown | 89   | 1.510 | 1.065 | 0.794 | *   |
| 1384916_at | Unknown | Unknown | 169  | 0.663 | 0.678 | 1.043 | *#  |
| 1385029_at | Unknown | Unknown | 313  | 1.110 | 1.005 | 1.503 | †   |
| 1385053_at | Unknown | Unknown | 136  | 0.894 | 0.456 | 0.811 | #   |
| 1385082_at | Unknown | Unknown | 143  | 0.814 | 0.412 | 0.809 | #   |
| 1385110_at | Unknown | Unknown | 71   | 1.516 | 1.235 | 1.116 | *   |
| 1385132_at | Unknown | Unknown | 75   | 1.397 | 3.387 | 2.267 | #†  |
| 1385138_at | Unknown | Unknown | 497  | 0.752 | 0.578 | 0.918 | *#  |
| 1385166_at | Unknown | Unknown | 45   | 1.149 | 1.565 | 1.076 | #   |
| 1385180_at | Unknown | Unknown | 68   | 1.782 | 1.252 | 0.934 | *#  |
| 1385243_at | Unknown | Unknown | 542  | 0.793 | 0.759 | 0.520 | †   |
| 1385393_at | Unknown | Unknown | 125  | 0.511 | 0.551 | 1.110 | *#  |
| 1385505_at | Unknown | Unknown | 90   | 0.791 | 0.530 | 0.685 | #†  |
| 1385569_at | Unknown | Unknown | 120  | 1.793 | 1.734 | 1.258 | *#  |
| 1385641_at | Unknown | Unknown | 187  | 1.829 | 1.023 | 0.609 | *†  |
| 1385798_at | Unknown | Unknown | 49   | 0.925 | 1.156 | 1.725 | †   |
| 1385869_at | Unknown | Unknown | 225  | 1.693 | 1.333 | 1.167 | *#† |
| 1385924_at | Unknown | Unknown | 80   | 0.689 | 0.662 | 0.903 | *#  |
| 1385925_at | Unknown | Unknown | 491  | 1.239 | 1.511 | 1.497 | #†  |
| 1385926_at | Unknown | Unknown | 239  | 1.225 | 1.143 | 1.857 | †   |
| 1386026_at | Unknown | Unknown | 75   | 0.736 | 0.646 | 0.807 | *#  |
| 1388742_at | Unknown | Unknown | 525  | 0.574 | 0.418 | 0.469 | *#† |
| 1388786_at | Unknown | Unknown | 844  | 0.471 | 0.879 | 1.229 | *†  |
| 1388804_at | Unknown | Unknown | 148  | 0.541 | 0.830 | 1.422 | *#† |
| 1388825_at | Unknown | Unknown | 328  | 0.915 | 1.623 | 1.179 | #†  |
| 1388880_at | Unknown | Unknown | 522  | 0.746 | 0.619 | 0.644 | *#† |
| 1388986_at | Unknown | Unknown | 726  | 1.702 | 1.500 | 1.539 | *#† |
| 1389039_at | Unknown | Unknown | 290  | 0.904 | 0.927 | 1.885 | †   |
| 1389082_at | Unknown | Unknown | 197  | 0.807 | 0.647 | 0.925 | #   |
| 1389159_at | Unknown | Unknown | 209  | 0.867 | 0.581 | 0.989 | #   |
| 1389186_at | Unknown | Unknown | 393  | 0.820 | 0.922 | 0.656 | *†  |
| 1389206_at | Unknown | Unknown | 59   | 1.232 | 1.865 | 0.908 | *#  |
| 1389230_at | Unknown | Unknown | 1069 | 0.651 | 0.545 | 0.721 | *#† |



|              |         |         |      |        |       |       |     |
|--------------|---------|---------|------|--------|-------|-------|-----|
| 1389256_at   | Unknown | Unknown | 420  | 0.782  | 0.630 | 0.917 | *#  |
| 1389284_at   | Unknown | Unknown | 236  | 0.918  | 0.636 | 0.580 | #†  |
| 1389394_at   | Unknown | Unknown | 1149 | 1.027  | 1.168 | 1.746 | †   |
| 1389419_at   | Unknown | Unknown | 160  | 0.470  | 0.691 | 0.997 | *#  |
| 1389460_at   | Unknown | Unknown | 103  | 0.437  | 0.565 | 0.956 | *#  |
| 1389465_at   | Unknown | Unknown | 397  | 1.392  | 1.506 | 1.071 | *#  |
| 1389500_at   | Unknown | Unknown | 374  | 0.833  | 0.842 | 0.422 | †   |
| 1389554_at   | Unknown | Unknown | 302  | 0.599  | 0.827 | 1.154 | *   |
| 1389586_at   | Unknown | Unknown | 354  | 1.134  | 1.341 | 1.865 | #†  |
| 1389612_at   | Unknown | Unknown | 78   | 0.889  | 0.651 | 0.790 | #   |
| 1389618_at   | Unknown | Unknown | 673  | 0.347  | 0.415 | 0.691 | *#† |
| 1389700_at   | Unknown | Unknown | 146  | 2.001  | 1.902 | 1.165 | *#  |
| 1389707_at   | Unknown | Unknown | 128  | 0.955  | 1.507 | 1.210 | #   |
| 1389726_at   | Unknown | Unknown | 122  | 0.660  | 0.729 | 0.836 | *#  |
| 1389748_at   | Unknown | Unknown | 288  | 0.625  | 0.617 | 0.831 | *#  |
| 1389761_at   | Unknown | Unknown | 76   | 1.653  | 1.094 | 1.230 | *   |
| 1389986_at   | Unknown | Unknown | 745  | 1.234  | 1.075 | 0.576 | †   |
| 1390109_at   | Unknown | Unknown | 985  | 0.591  | 0.641 | 1.174 | *#  |
| 1390136_at   | Unknown | Unknown | 110  | 1.447  | 2.094 | 1.165 | *#  |
| 1390364_at   | Unknown | Unknown | 98   | 1.732  | 1.857 | 1.874 | *#† |
| 1390427_at   | Unknown | Unknown | 105  | 0.617  | 0.635 | 1.052 | *#  |
| 1390430_at   | Unknown | Unknown | 320  | 0.648  | 0.586 | 1.109 | *#  |
| 1390436_at   | Unknown | Unknown | 680  | 1.354  | 1.352 | 0.566 | *#† |
| 1390457_at   | Unknown | Unknown | 81   | 0.887  | 0.661 | 0.926 | #   |
| 1390508_at   | Unknown | Unknown | 319  | 0.768  | 0.632 | 0.871 | *#† |
| 1390515_at   | Unknown | Unknown | 242  | 1.407  | 2.095 | 1.217 | *#  |
| 1390536_at   | Unknown | Unknown | 542  | 0.600  | 0.692 | 0.743 | *#† |
| 1390645_at   | Unknown | Unknown | 85   | 1.142  | 1.627 | 1.071 | #   |
| 1390659_at   | Unknown | Unknown | 454  | 3.179  | 3.321 | 1.709 | *#† |
| 1390902_at   | Unknown | Unknown | 77   | 1.357  | 1.802 | 1.125 | *#  |
| 1390969_at   | Unknown | Unknown | 883  | 0.353  | 0.509 | 1.136 | *#  |
| 1391071_at   | Unknown | Unknown | 35   | 1.054  | 1.124 | 1.844 | †   |
| 1391171_at   | Unknown | Unknown | 92   | 0.969  | 0.864 | 0.655 | †   |
| 1391256_at   | Unknown | Unknown | 107  | 1.353  | 1.370 | 1.616 | †   |
| 1391418_at   | Unknown | Unknown | 104  | 1.344  | 1.418 | 1.605 | *#† |
| 1391428_at   | Unknown | Unknown | 140  | 0.725  | 0.514 | 1.801 | *#† |
| 1391447_at   | Unknown | Unknown | 185  | 0.695  | 0.645 | 0.853 | *#  |
| 1391460_at   | Unknown | Unknown | 618  | 0.730  | 0.659 | 0.932 | *#  |
| 1391466_at   | Unknown | Unknown | 95   | 1.070  | 1.047 | 1.618 | †   |
| 1391551_at   | Unknown | Unknown | 106  | 1.049  | 1.028 | 1.528 | †   |
| 1391553_at   | Unknown | Unknown | 304  | 0.667  | 0.496 | 1.002 | *#  |
| 1391643_at   | Unknown | Unknown | 360  | 1.606  | 1.205 | 0.736 | *#† |
| 1391744_at   | Unknown | Unknown | 82   | 0.625  | 0.728 | 0.956 | *   |
| 1391753_at   | Unknown | Unknown | 247  | 2.134  | 2.283 | 1.401 | *#  |
| 1391812_at   | Unknown | Unknown | 174  | 0.865  | 0.910 | 0.313 | †   |
| 1391939_at   | Unknown | Unknown | 151  | 1.708  | 1.377 | 1.095 | *#  |
| 1392492_at   | Unknown | Unknown | 377  | 1.060  | 1.511 | 1.146 | #   |
| 1392501_at   | Unknown | Unknown | 117  | 0.885  | 0.565 | 0.741 | #†  |
| 1392566_at   | Unknown | Unknown | 186  | 0.907  | 0.866 | 0.573 | --- |
| 1392618_at   | Unknown | Unknown | 501  | 1.127  | 1.826 | 1.409 | #†  |
| 1392627_x_at | Unknown | Unknown | 1143 | 0.945  | 1.011 | 2.153 | †   |
| 1392791_at   | Unknown | Unknown | 37   | 12.431 | 1.693 | 1.145 | *#  |

|              |         |         |      |       |       |       |     |
|--------------|---------|---------|------|-------|-------|-------|-----|
| 1392842_at   | Unknown | Unknown | 307  | 0.774 | 0.656 | 0.668 | *#† |
| 1392893_a_at | Unknown | Unknown | 122  | 0.733 | 0.702 | 0.633 | *†  |
| 1392933_a_at | Unknown | Unknown | 65   | 0.704 | 0.622 | 0.748 | *#† |
| 1392935_at   | Unknown | Unknown | 349  | 0.542 | 0.719 | 1.609 | *#† |
| 1393003_at   | Unknown | Unknown | 326  | 1.408 | 2.134 | 1.450 | *#† |
| 1393119_at   | Unknown | Unknown | 469  | 1.783 | 1.538 | 1.704 | *#† |
| 1393120_at   | Unknown | Unknown | 208  | 0.653 | 0.744 | 1.009 | *#  |
| 1393262_at   | Unknown | Unknown | 202  | 0.448 | 0.710 | 0.733 | *#† |
| 1393302_at   | Unknown | Unknown | 107  | 0.966 | 0.751 | 0.646 | †   |
| 1393492_at   | Unknown | Unknown | 133  | 1.061 | 1.529 | 1.529 | #†  |
| 1393494_at   | Unknown | Unknown | 98   | 1.745 | 1.650 | 1.492 | *#† |
| 1393516_at   | Unknown | Unknown | 122  | 0.840 | 0.650 | 0.979 | #   |
| 1393522_at   | Unknown | Unknown | 291  | 1.526 | 1.922 | 1.216 | *#  |
| 1393559_at   | Unknown | Unknown | 319  | 1.391 | 1.212 | 1.717 | --- |
| 1393648_at   | Unknown | Unknown | 56   | 2.023 | 1.404 | 1.024 | *#  |
| 1393653_at   | Unknown | Unknown | 222  | 0.936 | 0.970 | 2.313 | †   |
| 1393728_at   | Unknown | Unknown | 102  | 3.375 | 1.954 | 1.702 | *#† |
| 1393743_at   | Unknown | Unknown | 313  | 0.439 | 0.452 | 0.990 | *#  |
| 1393782_at   | Unknown | Unknown | 51   | 1.564 | 1.102 | 0.950 | *#  |
| 1393793_at   | Unknown | Unknown | 339  | 0.503 | 0.560 | 0.718 | *#  |
| 1393860_at   | Unknown | Unknown | 203  | 1.414 | 1.929 | 1.282 | *#† |
| 1393883_at   | Unknown | Unknown | 123  | 1.100 | 1.276 | 1.761 | †   |
| 1394047_at   | Unknown | Unknown | 89   | 1.189 | 1.599 | 0.975 | #   |
| 1394109_at   | Unknown | Unknown | 1102 | 5.554 | 4.044 | 2.774 | *#† |
| 1394456_at   | Unknown | Unknown | 198  | 0.791 | 0.622 | 0.860 | #   |
| 1394517_at   | Unknown | Unknown | 572  | 0.563 | 0.516 | 0.937 | *#  |
| 1394527_at   | Unknown | Unknown | 71   | 1.593 | 1.284 | 1.092 | *   |
| 1394727_at   | Unknown | Unknown | 36   | 1.039 | 1.113 | 1.508 | †   |
| 1394907_at   | Unknown | Unknown | 271  | 0.621 | 1.048 | 1.214 | *   |
| 1394932_at   | Unknown | Unknown | 291  | 1.327 | 1.510 | 0.937 | *#  |
| 1394948_at   | Unknown | Unknown | 383  | 0.650 | 0.570 | 0.697 | *#† |
| 1395119_at   | Unknown | Unknown | 138  | 2.410 | 3.446 | 1.101 | *#  |
| 1395197_at   | Unknown | Unknown | 164  | 1.274 | 1.599 | 1.054 | *#  |
| 1395350_at   | Unknown | Unknown | 80   | 1.582 | 1.607 | 1.166 | *#  |
| 1395355_at   | Unknown | Unknown | 136  | 1.499 | 1.593 | 1.054 | *#  |
| 1395362_at   | Unknown | Unknown | 540  | 0.984 | 1.357 | 1.517 | #†  |
| 1395442_at   | Unknown | Unknown | 61   | 1.533 | 1.983 | 1.993 | *#† |
| 1395518_at   | Unknown | Unknown | 458  | 0.538 | 0.593 | 0.985 | *#  |
| 1395557_at   | Unknown | Unknown | 238  | 1.960 | 1.850 | 1.754 | *#† |
| 1395615_at   | Unknown | Unknown | 65   | 1.916 | 2.270 | 1.416 | *#† |
| 1395704_at   | Unknown | Unknown | 96   | 0.869 | 0.664 | 0.975 | #   |
| 1395814_at   | Unknown | Unknown | 131  | 1.712 | 2.001 | 0.924 | *#  |
| 1396057_at   | Unknown | Unknown | 163  | 0.780 | 0.577 | 1.033 | #   |
| 1396263_at   | Unknown | Unknown | 209  | 1.119 | 1.673 | 1.273 | #†  |
| 1396539_at   | Unknown | Unknown | 79   | 2.009 | 1.664 | 1.518 | *#† |
| 1396799_at   | Unknown | Unknown | 57   | 0.957 | 1.099 | 1.521 | †   |
| 1397164_at   | Unknown | Unknown | 412  | 1.792 | 1.329 | 1.153 | *#  |
| 1397204_s_at | Unknown | Unknown | 63   | 0.928 | 1.096 | 1.553 | --- |
| 1397215_at   | Unknown | Unknown | 75   | 1.593 | 1.061 | 0.958 | *   |
| 1397300_at   | Unknown | Unknown | 318  | 0.799 | 0.663 | 0.785 | *#† |
| 1397449_at   | Unknown | Unknown | 49   | 1.378 | 1.545 | 1.000 | #   |
| 1397470_at   | Unknown | Unknown | 176  | 0.673 | 0.476 | 0.965 | *#  |

|              |                       |                                                                       |      |       |       |       |     |
|--------------|-----------------------|-----------------------------------------------------------------------|------|-------|-------|-------|-----|
| 1397540_at   | Unknown               | Unknown                                                               | 454  | 0.627 | 0.476 | 0.663 | *#† |
| 1397766_at   | Unknown               | Unknown                                                               | 54   | 6.323 | 1.797 | 1.502 | *#† |
| 1397808_at   | Unknown               | Unknown                                                               | 963  | 0.554 | 0.298 | 0.417 | *#† |
| 1397851_at   | Unknown               | Unknown                                                               | 261  | 1.196 | 1.525 | 1.256 | #   |
| 1397897_x_at | Unknown               | Unknown                                                               | 153  | 1.042 | 1.235 | 1.577 | †   |
| 1397944_at   | Unknown               | Unknown                                                               | 104  | 1.517 | 1.986 | 1.347 | *#† |
| 1398348_at   | Unknown               | Unknown                                                               | 818  | 1.045 | 1.201 | 1.942 | †   |
| 1398394_at   | Unknown               | Unknown                                                               | 50   | 1.704 | 1.386 | 0.883 | *#  |
| 1398493_at   | Unknown               | Unknown                                                               | 193  | 0.690 | 0.660 | 0.897 | --- |
| 1398597_at   | Unknown               | Unknown                                                               | 194  | 0.591 | 0.820 | 1.493 | *#† |
| 1398727_at   | Unknown               | Unknown                                                               | 442  | 0.691 | 0.468 | 0.684 | *#† |
| 1399071_at   | Unknown               | Unknown                                                               | 569  | 1.836 | 1.438 | 1.186 | *#† |
| 1399113_at   | Unknown               | Unknown                                                               | 674  | 1.185 | 1.423 | 1.631 | #†  |
| 1389091_at   | Usp3                  | Ubiquitin specific peptidase 3                                        | 529  | 0.662 | 0.725 | 0.867 | *#† |
| 1373510_at   | Vamp1                 | Vesicle-associated membrane protein 1                                 | 241  | 0.848 | 0.797 | 0.590 | *#† |
| 1389689_at   | Vars2                 | Valyl-tRNA synthetase 2, mitochondrial (putative)                     | 83   | 0.662 | 0.727 | 1.135 | *#  |
| 1389271_at   | Vasn                  | Vasorin                                                               | 671  | 2.238 | 1.837 | 1.333 | *#† |
| 1368474_at   | Vcam1                 | Vascular cell adhesion molecule 1                                     | 1083 | 0.855 | 0.604 | 0.331 | #†  |
| 1372905_at   | Vcl                   | Vinculin                                                              | 1656 | 1.688 | 1.410 | 1.903 | *†  |
| 1375538_at   | Vcl                   | Vinculin                                                              | 1968 | 1.683 | 1.527 | 1.342 | *#  |
| 1398476_at   | Vcl                   | Vinculin                                                              | 760  | 1.767 | 2.029 | 1.665 | *#† |
| 1368463_at   | Vegfc                 | Vascular endothelial growth factor C                                  | 253  | 1.957 | 1.896 | 1.939 | *#† |
| 1377778_at   | Vof16                 | Ischemia related factor vof-16                                        | 103  | 1.751 | 1.936 | 1.107 | *#  |
| 1385449_s_at | Vps37b                | Vacuolar protein sorting 37 homolog B (S. cerevisiae)                 | 151  | 1.365 | 1.896 | 1.172 | *#  |
| 1373399_at   | Wdr6                  | WD repeat domain 6                                                    | 969  | 0.798 | 0.649 | 0.810 | #   |
| 1389644_at   | Wdr67                 | WD repeat domain 67                                                   | 84   | 0.825 | 0.634 | 0.937 | #   |
| 1373746_at   | Wdr91                 | WD repeat domain 91                                                   | 117  | 0.662 | 0.748 | 0.744 | *#† |
| 1387873_at   | Wfdc1                 | WAP four-disulfide core domain 1                                      | 217  | 0.990 | 1.172 | 1.760 | †   |
| 1382283_at   | Wipf1                 | WAS/WASL interacting protein family, member 1                         | 174  | 0.664 | 0.892 | 0.961 | *   |
| 1370221_at   | Wisp1                 | WNT1 inducible signaling pathway protein 1                            | 123  | 1.226 | 1.732 | 2.214 | #†  |
| 1369484_at   | Wisp2                 | WNT1 inducible signaling pathway protein 2                            | 572  | 0.892 | 1.157 | 2.378 | †   |
| 1377223_at   | Wt1                   | Wilms tumor 1                                                         | 193  | 0.480 | 0.810 | 1.367 | *†  |
| 1385783_at   | Wwc2                  | WW and C2 domain containing 2                                         | 492  | 0.979 | 1.063 | 1.543 | †   |
| 1392670_at   | Wwc2                  | WW and C2 domain containing 2                                         | 367  | 0.904 | 0.979 | 1.789 | †   |
| 1395525_at   | Wwc2                  | WW and C2 domain containing 2                                         | 512  | 0.957 | 0.982 | 1.543 | †   |
| 1369973_at   | Xdh                   | Xanthine dehydrogenase                                                | 377  | 0.895 | 0.750 | 0.534 | #†  |
| 1389119_at   | Xirp1                 | Xin actin-binding repeat containing 1                                 | 942  | 3.011 | 2.767 | 1.205 | *#  |
| 1384029_at   | Xpa                   | Xeroderma pigmentosum, complementation group A                        | 121  | 0.610 | 0.511 | 0.909 | *#  |
| 1375846_at   | Xpr1                  | Xenotropic and polytropic retrovirus receptor 1                       | 834  | 1.134 | 1.590 | 1.541 | #†  |
| 1371729_at   | Ypel5                 | Yippee-like 5 (Drosophila)                                            | 578  | 0.691 | 0.663 | 1.020 | *#† |
| 1377687_at   | Zc4h2                 | Zinc finger, C4H2 domain containing                                   | 137  | 0.789 | 0.598 | 1.145 | *#  |
| 1390820_at   | Zcchc11               | Zinc finger, CCHC domain containing 11                                | 124  | 0.624 | 0.669 | 1.033 | *#  |
| 1378948_at   | Zcchc24               | Zinc finger, CCHC domain containing 24                                | 207  | 0.659 | 0.763 | 0.819 | *   |
| 1386106_at   | Zcchc24               | Zinc finger, CCHC domain containing 24                                | 318  | 0.457 | 0.553 | 0.824 | *#  |
| 1388672_at   | Zcchc24               | Zinc finger, CCHC domain containing 24                                | 771  | 0.611 | 0.579 | 0.808 | *#† |
| 1372989_at   | Zdhhc14               | Zinc finger, DHHC-type containing 14                                  | 64   | 0.923 | 1.359 | 1.507 | #†  |
| 1372205_at   | Zfp278                | Zinc finger protein 278                                               | 286  | 0.527 | 0.980 | 0.921 | *   |
| 1382642_at   | Zfp281                | Zinc finger protein 281                                               | 316  | 1.661 | 1.352 | 1.342 | *#† |
| 1392699_at   | Zfp346                | Zinc finger protein 346                                               | 63   | 0.726 | 0.641 | 0.968 | *#  |
| 1387870_at   | Zfp36                 | Zinc finger protein 36                                                | 629  | 1.661 | 1.335 | 1.020 | *#  |
| 1378049_at   | Zfp362 ///<br>Zscan20 | Zinc finger protein 362 /// Zinc finger and SCAN domain containing 20 | 327  | 0.659 | 0.872 | 0.960 | *#  |

|              |         |                                          |      |       |       |       |     |
|--------------|---------|------------------------------------------|------|-------|-------|-------|-----|
| 1372865_at   | Zfp364  | Zinc finger protein 364                  | 1412 | 1.332 | 1.511 | 1.149 | *#† |
| 1379967_at   | Zfp367  | Zinc finger protein 367                  | 88   | 2.007 | 1.295 | 1.189 | *   |
| 1369959_at   | Zfp361  | Zinc finger protein 36, C3H type-like 1  | 2790 | 0.615 | 0.696 | 0.894 | *#  |
| 1373106_at   | Zfp362  | Zinc finger protein 36, C3H type-like 2  | 904  | 1.818 | 1.600 | 1.001 | *#  |
| 1389851_at   | Zfp362  | Zinc finger protein 36, C3H type-like 2  | 56   | 1.657 | 1.563 | 0.973 | *#  |
| 1368542_at   | Zfp423  | Zinc finger protein 423                  | 168  | 0.618 | 0.499 | 0.762 | *#† |
| 1393360_at   | Zfp426l | Zinc finger protein 426-like             | 701  | 0.564 | 0.726 | 0.993 | *#  |
| 1394654_at   | Zfp451  | Zinc finger protein 451                  | 58   | 1.518 | 1.408 | 0.966 | *#  |
| 1370984_at   | Zfp46   | Zinc finger protein 46                   | 369  | 0.652 | 0.899 | 0.949 | *   |
| 1367540_at   | Zfyve26 | Zinc finger, FYVE domain containing 26   | 263  | 0.639 | 0.736 | 0.919 | *#  |
| 1382744_at   | Zkscan3 | Zinc finger with KRAB and SCAN domains 3 | 242  | 0.549 | 0.865 | 1.003 | *   |
| 1398573_at   | Zkscan3 | Zinc finger with KRAB and SCAN domains 3 | 238  | 0.583 | 0.809 | 1.037 | *   |
| 1377701_at   | Zmym6   | Zinc finger, MYM-type 6                  | 155  | 0.627 | 0.712 | 0.872 | *#  |
| 1390945_at   | Znf292  | Zinc finger protein 292                  | 145  | 0.646 | 0.836 | 0.869 | *   |
| 1391507_at   | Znf467  | Zinc finger protein 467                  | 172  | 0.500 | 0.512 | 0.963 | *#  |
| 1386721_at   | Znf503  | Zinc finger protein 503                  | 295  | 0.770 | 0.904 | 0.663 | *†  |
| 1393944_at   | Znf521  | Zinc finger protein 521                  | 259  | 0.653 | 0.689 | 0.989 | *#  |
| 1389445_at   | Znf688  | Zinc finger protein 688                  | 139  | 0.600 | 0.844 | 0.932 | *   |
| 1372699_at   | Znf775  | Zinc finger protein 775                  | 68   | 0.599 | 0.798 | 0.957 | *   |
| 1374664_at   | Znf787  | Zinc finger protein 787                  | 286  | 0.634 | 0.815 | 0.864 | *#† |
| 1391972_a_at | Zswim4  | Zinc finger, SWIM-type containing 4      | 170  | 1.975 | 1.457 | 0.946 | *#  |

## Supplemental Table S6 Changes in transcript expression induced by PE and/or ET-1 at 24 h

RNA analysis was performed using Affymetrix rat expression 230 2.0 microarrays and GeneSpring 12.0. The raw data for controls are given and results at each time are the mean fold change relative to the controls (n=3). Statistical analysis was performed by one-way ANOVA with SNK post-test using a Benjamini and Hochberg false discovery rate correction (FDR<0.05) \* PE vs control; # ET-1 vs control; † PE vs ET-1

| Probeset ID  | Gene Symbol | Gene Title                                                       | Raw data (Control) | ET-1  | PE    | Statistical significance |
|--------------|-------------|------------------------------------------------------------------|--------------------|-------|-------|--------------------------|
| 1383355_at   | Abca1       | ATP-binding cassette, sub-family A (ABC1), member 1              | 316.04             | 0.655 | 0.869 | #                        |
| 1394490_at   | Abca1       | ATP-binding cassette, sub-family A (ABC1), member 1              | 137.60             | 0.626 | 0.762 | ---                      |
| 1390783_at   | Abca8a      | ATP-binding cassette, sub-family A (ABC1), member 8a             | 195.54             | 0.507 | 0.661 | *#                       |
| 1379402_at   | Abcc4       | ATP-binding cassette, sub-family C (CFTR/MRP), member 4          | 158.63             | 0.615 | 0.781 | *#†                      |
| 1390455_at   | Abhd2       | Abhydrolase domain containing 2                                  | 197.76             | 1.451 | 1.822 | *                        |
| 1388153_at   | Acsl1       | Acyl-CoA synthetase long-chain family member 1                   | 820.86             | 0.611 | 0.761 | #                        |
| 1397375_at   | Acsl5       | Acyl-CoA synthetase long-chain family member 5                   | 212.17             | 1.602 | 1.364 | *#                       |
| 1370857_at   | Acta2       | Smooth muscle alpha-actin                                        | 2482.46            | 2.241 | 1.408 | #                        |
| 1386869_at   | Actg2       | Actin, gamma 2, smooth muscle, enteric                           | 85.81              | 2.699 | 1.288 | #†                       |
| 1389189_at   | Actn1       | Actinin, alpha 1                                                 | 1716.26            | 1.868 | 1.630 | ---                      |
| 1398294_at   | Actn1       | Actinin, alpha 1                                                 | 1193.36            | 1.758 | 1.443 | #                        |
| 1369942_at   | Actn4       | Actinin alpha 4                                                  | 1499.44            | 1.798 | 1.367 | *#                       |
| 1393730_at   | Adamts4     | ADAM metalloproteinase with thrombospondin type 1 motif, 4       | 222.08             | 0.590 | 0.812 | *#†                      |
| 1379022_at   | Adamts8     | ADAM metalloproteinase with thrombospondin type 1 motif, 8       | 103.57             | 1.763 | 1.299 | #                        |
| 1398370_at   | Adarb1      | Adenosine deaminase, RNA-specific, B1                            | 112.15             | 1.617 | 1.239 | #                        |
| 1368300_at   | Adora2a     | Adenosine A2a receptor                                           | 122.79             | 0.496 | 0.761 | #†                       |
| 1387395_at   | Adora2b     | Adenosine A2B receptor                                           | 403.34             | 0.603 | 0.827 | *#†                      |
| 1368574_at   | Adra1b      | Adrenergic, alpha-1B-, receptor                                  | 391.97             | 0.567 | 0.694 | *#                       |
| 1369146_a_at | Ahr         | Aryl hydrocarbon receptor                                        | 89.28              | 1.613 | 1.493 | *#                       |
| 1375845_at   | Aig1        | Androgen-induced 1                                               | 399.75             | 1.634 | 1.474 | *#                       |
| 1389496_at   | Akap7       | A kinase (PRKA) anchor protein 7                                 | 404.03             | 1.511 | 1.210 | #                        |
| 1392079_at   | Akap7       | A kinase (PRKA) anchor protein 7                                 | 105.30             | 1.765 | 1.201 | #†                       |
| 1370563_at   | Akr1c14     | Aldo-keto reductase family 1, member C14                         | 117.82             | 0.643 | 0.819 | *#†                      |
| 1396933_s_at | Akr1c14     | Aldo-keto reductase family 1, member C14                         | 108.87             | 0.585 | 0.727 | *#                       |
| 1394681_at   | Akr1cl1     | Aldo-keto reductase family 1, member C-like 1                    | 672.43             | 0.590 | 0.703 | *#                       |
| 1368003_at   | Aldh1a2     | Aldehyde dehydrogenase 1 family, member A2                       | 258.13             | 1.653 | 1.282 | #                        |
| 1386998_at   | Aldoc       | Aldolase C, fructose-bisphosphate                                | 734.22             | 0.510 | 0.609 | *#†                      |
| 1389546_at   | Amotl2      | Angiomotin like 2                                                | 649.40             | 1.552 | 1.191 | #                        |
| 1368342_at   | Ampd3       | Adenosine monophosphate deaminase 3                              | 259.88             | 0.542 | 0.538 | #                        |
| 1374207_at   | Angpt2      | Angiopoietin 2                                                   | 231.92             | 0.545 | 0.982 | #†                       |
| 1389398_at   | Ank1        | Ankyrin 1, erythrocytic                                          | 240.79             | 0.425 | 0.608 | *#†                      |
| 1372069_at   | Ankrd15     | Ankyrin repeat domain 15                                         | 574.66             | 1.507 | 1.432 | *#                       |
| 1373250_at   | Anln        | Anillin, actin binding protein                                   | 249.58             | 1.406 | 1.518 | *#                       |
| 1372615_at   | Aoc3        | Amine oxidase, copper containing 3 (vascular adhesion protein 1) | 96.04              | 0.772 | 0.654 | *#                       |
| 1387376_at   | Aox1        | Aldehyde oxidase 1                                               | 228.40             | 0.311 | 0.554 | *#†                      |
| 1398616_at   | Ap1s2       | Adaptor-related protein complex 1, sigma 2 subunit               | 663.27             | 0.721 | 0.621 | *#                       |
| 1389651_at   | Apln        | Apelin                                                           | 315.12             | 0.478 | 0.989 | #†                       |
| 1379772_at   | Aplnr       | Apelin receptor                                                  | 131.76             | 0.590 | 0.928 | #†                       |
| 1370862_at   | Apoe        | Apolipoprotein E                                                 | 4175.70            | 0.489 | 0.809 | #†                       |

|              |                   |                                                                                   |         |       |       |     |
|--------------|-------------------|-----------------------------------------------------------------------------------|---------|-------|-------|-----|
| 1377750_at   | Arhgef3           | Rho guanine nucleotide exchange factor (GEF) 3                                    | 144.31  | 1.630 | 1.427 | *#  |
| 1385361_at   | Atp10a            | ATPase, class V, type 10A                                                         | 61.69   | 1.963 | 1.214 | *#† |
| 1368701_at   | Atp1a3            | ATPase, Na+/K+ transporting, alpha 3 polypeptide                                  | 236.06  | 0.854 | 0.658 | *   |
| 1369798_at   | Atp1b2            | ATPase, Na+/K+ transporting, beta 2 polypeptide                                   | 85.91   | 0.597 | 0.709 | *#  |
| 1379906_at   | Atp1b2            | ATPase, Na+/K+ transporting, beta 2 polypeptide                                   | 419.01  | 0.485 | 0.618 | *#† |
| 1378134_at   | Atp8b1            | ATPase, Class I, type 8B, member 1                                                | 83.29   | 1.964 | 1.215 | #†  |
| 1390294_at   | Atxn7l4           | Ataxin 7-like 4                                                                   | 164.84  | 1.549 | 1.218 | *#† |
| 1398347_at   | Axl /// LOC687188 | Axl receptor tyrosine kinase /// similar to AXL receptor tyrosine kinase          | 1002.00 | 1.788 | 1.334 | *#† |
| 1389047_at   | Bag2              | Bcl2-associated athanogene 2                                                      | 468.42  | 1.516 | 1.324 | --- |
| 1370869_at   | Bcat1             | Branched chain aminotransferase 1, cytosolic                                      | 989.27  | 1.629 | 1.616 | --- |
| 1370897_at   | Bckdha            | Branched chain ketoacid dehydrogenase E1, alpha polypeptide                       | 170.23  | 0.589 | 0.707 | *#  |
| 1398482_at   | Bcl3              | B-cell CLL/lymphoma 3                                                             | 272.66  | 0.599 | 0.755 | *#† |
| 1372613_at   | Bdh2              | 3-hydroxybutyrate dehydrogenase, type 2                                           | 371.30  | 0.730 | 0.647 | *#  |
| 1370113_at   | Birc3             | Baculoviral IAP repeat-containing 3                                               | 141.30  | 0.657 | 0.808 | *#† |
| 1398270_at   | Bmp2              | Bone morphogenetic protein 2                                                      | 125.58  | 1.384 | 1.724 | *   |
| 1387232_at   | Bmp4              | Bone morphogenetic protein 4                                                      | 123.42  | 2.093 | 1.261 | #†  |
| 1368000_at   | C3                | Complement component 3                                                            | 282.30  | 0.353 | 0.725 | #†  |
| 1370892_at   | C4-2 /// C4b      | Complement component 4, gene 2 /// Complement component 4B (Childo blood group)   | 760.11  | 0.341 | 0.669 | *#† |
| 1384580_at   | C6                | Complement component 6                                                            | 92.00   | 0.545 | 0.835 | #†  |
| 1383291_at   | C7 /// Tubb2c     | Complement component 7 /// tubulin, beta 2c                                       | 3306.12 | 0.493 | 0.929 | #†  |
| 1388557_at   | C7 /// Tubb2c     | Complement component 7 /// tubulin, beta 2c                                       | 2740.97 | 0.539 | 0.982 | #†  |
| 1372536_at   | Cabc1             | Chaperone, ABC1 activity of bc1 complex homolog (S. pombe)                        | 305.24  | 0.724 | 0.568 | *   |
| 1376657_at   | Cadm1             | Cell adhesion molecule 1                                                          | 48.58   | 1.945 | 1.150 | #†  |
| 1384132_at   | Cadm1             | Cell adhesion molecule 1                                                          | 81.77   | 1.872 | 1.254 | *#† |
| 1368824_at   | Cald1             | Caldesmon 1                                                                       | 429.75  | 1.920 | 1.318 | #   |
| 1368131_at   | Capn6             | Calpain 6                                                                         | 322.90  | 0.538 | 0.689 | *#† |
| 1386922_at   | Car2              | Carbonic anhydrase II                                                             | 133.22  | 0.666 | 0.844 | #   |
| 1388604_at   | Casq1             | Calsequestrin 1 (fast-twitch, skeletal muscle)                                    | 298.38  | 1.780 | 1.702 | --- |
| 1393281_at   | Cav1              | Caveolin 1, caveolae protein                                                      | 799.76  | 1.504 | 1.136 | #†  |
| 1390101_at   | Ccdc107           | Coiled-coil domain containing 107                                                 | 383.47  | 1.866 | 1.551 | *#  |
| 1385426_at   | Ccdc109b          | Coiled-coil domain containing 109B                                                | 115.18  | 1.730 | 1.226 | #   |
| 1367973_at   | Ccl2              | Chemokine (C-C motif) ligand 2                                                    | 3386.98 | 0.602 | 0.885 | *#† |
| 1376850_a_at | Ccl27             | Chemokine (C-C motif) ligand 27                                                   | 91.23   | 1.473 | 1.820 | *#  |
| 1379935_at   | Ccl7              | Chemokine (C-C motif) ligand 7                                                    | 956.78  | 0.516 | 0.749 | *#† |
| 1389566_at   | Ccnb2             | Cyclin B2                                                                         | 350.82  | 1.510 | 1.214 | #   |
| 1367689_a_at | Cd36              | CD36 molecule (thrombospondin receptor)                                           | 1285.88 | 0.576 | 0.588 | *#  |
| 1386901_at   | Cd36              | CD36 molecule (thrombospondin receptor)                                           | 1823.52 | 0.595 | 0.647 | *#  |
| 1368975_at   | Cd38              | CD38 molecule                                                                     | 38.55   | 1.601 | 1.533 | *#  |
| 1372299_at   | Cdkn1c            | Cyclin-dependent kinase inhibitor 1C (P57)                                        | 294.59  | 0.637 | 0.725 | *#  |
| 1368480_at   | Cdw92             | CDW92 antigen                                                                     | 619.31  | 0.648 | 0.865 | *#† |
| 1373054_at   | Cdw92             | CDW92 antigen                                                                     | 1554.93 | 0.621 | 0.960 | #†  |
| 1389470_at   | Cfb               | Complement factor B                                                               | 110.23  | 0.629 | 0.741 | *#  |
| 1392171_at   | Chi3l1            | Chitinase 3-like 1                                                                | 516.66  | 0.340 | 0.697 | *#† |
| 1389179_at   | Cidea             | Cell death-inducing DNA fragmentation factor, alpha subunit-like effector A       | 1244.61 | 0.664 | 0.796 | #   |
| 1367601_at   | Cited2            | Cbp/p300-interacting transactivator, with Glu/Asp-rich carboxy-terminal domain, 2 | 371.31  | 1.934 | 1.255 | *#† |
| 1367602_at   | Cited2            | Cbp/p300-interacting transactivator, with Glu/Asp-rich carboxy-terminal domain, 2 | 518.76  | 1.725 | 1.184 | #†  |
| 1367626_at   | Ckm               | Creatine kinase, muscle                                                           | 1888.66 | 0.505 | 0.641 | *#  |
| 1374104_at   | Cldn5             | Claudin 5                                                                         | 129.40  | 0.543 | 0.846 | #†  |
| 1383219_at   | Clip4             | CAP-GLY domain containing linker protein family, member 4                         | 379.06  | 0.632 | 0.612 | *#  |
| 1382269_at   | Cnnm2             | Cyclin M2                                                                         | 80.97   | 1.660 | 0.802 | *#† |
| 1392915_at   | Col11a1           | Collagen, type XI, alpha 1                                                        | 63.53   | 1.742 | 0.998 | #†  |

|              |         |                                                                                |         |       |       |     |
|--------------|---------|--------------------------------------------------------------------------------|---------|-------|-------|-----|
| 1370927_at   | Col12a1 | Collagen, type XII, alpha 1                                                    | 282.20  | 2.852 | 1.919 | *#† |
| 1395580_at   | Col12a1 | Collagen, type XII, alpha 1                                                    | 120.23  | 2.322 | 1.721 | *#  |
| 1398321_a_at | Col12a1 | Collagen, type XII, alpha 1                                                    | 203.52  | 2.549 | 1.694 | #   |
| 1376955_at   | Col4a4  | Procollagen, type IV, alpha 4                                                  | 81.99   | 1.431 | 1.553 | --- |
| 1393891_at   | Col8a1  | Collagen, type VIII, alpha 1                                                   | 215.46  | 3.070 | 1.538 | *#† |
| 1368648_at   | Cox4i2  | Cytochrome c oxidase subunit IV isoform 2                                      | 184.55  | 1.056 | 1.501 | *†  |
| 1367742_at   | Cpt1b   | Carnitine palmitoyltransferase 1b, muscle                                      | 1017.49 | 0.563 | 0.595 | *#  |
| 1390420_at   | Cpxm1   | Carboxypeptidase X (M14 family), member 1                                      | 1065.87 | 0.291 | 0.607 | *#† |
| 1375428_at   | Creg1   | Cellular repressor of E1A-stimulated genes 1                                   | 147.19  | 0.655 | 0.685 | *#  |
| 1382037_at   | Crim1   | Cysteine rich transmembrane BMP regulator 1 (chordin like)                     | 169.38  | 1.861 | 1.190 | #†  |
| 1398622_at   | Crim1   | Cysteine rich transmembrane BMP regulator 1 (chordin like)                     | 709.30  | 1.838 | 1.192 | #†  |
| 1376799_a_at | Crlf1   | Cytokine receptor-like factor 1                                                | 226.34  | 3.155 | 2.354 | *#† |
| 1395512_at   | Crlf1   | Cytokine receptor-like factor 1                                                | 165.16  | 3.169 | 2.449 | *#  |
| 1368685_at   | Cspg4   | Chondroitin sulfate proteoglycan 4                                             | 279.93  | 1.611 | 1.542 | --- |
| 1367838_at   | Cth     | Cystathionase (cystathionine gamma-lyase)                                      | 42.85   | 2.103 | 1.548 | #   |
| 1384063_at   | Cthrc1  | Collagen triple helix repeat containing 1                                      | 2049.93 | 1.639 | 1.456 | *#  |
| 1368280_at   | Ctsc    | Cathepsin C                                                                    | 1225.27 | 0.569 | 0.788 | *#† |
| 1374778_at   | Ctsc    | Cathepsin C                                                                    | 920.97  | 0.604 | 0.829 | #†  |
| 1387316_at   | Cxcl1   | Chemokine (C-X-C motif) ligand 1 (melanoma growth stimulating activity, alpha) | 2114.59 | 0.409 | 0.781 | *#† |
| 1379365_at   | Cxcl11  | Chemokine (C-X-C motif) ligand 11                                              | 456.69  | 0.401 | 0.303 | *#  |
| 1387648_at   | Cxcl6   | Chemokine (C-X-C motif) ligand 6 (granulocyte chemotactic protein 2)           | 755.62  | 0.206 | 0.625 | *#† |
| 1370097_a_at | Cxcr4   | Chemokine (C-X-C motif) receptor 4                                             | 340.53  | 0.499 | 0.942 | #†  |
| 1373661_a_at | Cxcr4   | Chemokine (C-X-C motif) receptor 4                                             | 388.53  | 0.600 | 1.060 | #†  |
| 1389244_x_at | Cxcr4   | Chemokine (C-X-C motif) receptor 4                                             | 481.65  | 0.595 | 1.002 | #†  |
| 1376788_at   | Dapk1   | Death associated protein kinase 1                                              | 944.54  | 0.394 | 0.607 | *#† |
| 1379911_at   | Dapk1   | Death associated protein kinase 1                                              | 451.84  | 0.436 | 0.663 | *#† |
| 1387874_at   | Dbp     | D site of albumin promoter (albumin D-box) binding protein                     | 209.58  | 0.667 | 0.804 | *#  |
| 1387111_at   | Ddah1   | Dimethylarginine dimethylaminohydrolase 1                                      | 862.65  | 1.769 | 1.864 | *#  |
| 1367793_at   | Ddt     | D-dopachrome tautomerase                                                       | 1640.15 | 0.642 | 0.778 | *#† |
| 1389079_at   | Dhrs7c  | Dehydrogenase/reductase (SDR family) member 7C                                 | 93.25   | 0.647 | 0.513 | *#  |
| 1370328_at   | Dkk3    | Dickkopf homolog 3 (Xenopus laevis)                                            | 1670.14 | 0.874 | 0.631 | *†  |
| 1377835_at   | Dock8   | Dedicator of cytokinesis 8                                                     | 201.10  | 1.712 | 1.222 | *#† |
| 1371732_at   | Dpt     | Dermatopontin                                                                  | 2281.00 | 0.595 | 0.770 | *#† |
| 1373947_at   | Dpt     | Dermatopontin                                                                  | 2454.83 | 0.583 | 0.767 | *#† |
| 1380964_at   | Dtna    | Dystrobrevin alpha                                                             | 51.63   | 1.553 | 1.407 | *#  |
| 1373324_at   | Dusp14  | Dual specificity phosphatase 14                                                | 148.54  | 1.502 | 1.261 | *#  |
| 1377064_at   | Dusp6   | Dual specificity phosphatase 6                                                 | 409.45  | 1.591 | 1.491 | *#  |
| 1383747_at   | Ect2    | Epithelial cell transforming sequence 2 oncogene                               | 109.99  | 1.531 | 1.215 | #†  |
| 1378342_at   | Ednra   | Endothelin receptor type A                                                     | 435.94  | 0.586 | 0.739 | *#† |
| 1383641_at   | Ednra   | Endothelin receptor type A                                                     | 532.91  | 0.576 | 0.746 | *#† |
| 1387146_a_at | Ednrb   | Endothelin receptor type B                                                     | 100.95  | 1.719 | 1.097 | #†  |
| 1390112_at   | Efemp1  | EGF-containing fibulin-like extracellular matrix protein 1                     | 356.55  | 0.185 | 0.435 | *#† |
| 1376770_at   | Efhd1   | EF-hand domain family, member D1                                               | 72.03   | 0.740 | 0.665 | *#  |
| 1383078_at   | Efnb3   | Ephrin B3                                                                      | 579.01  | 0.538 | 0.746 | *#† |
| 1368967_at   | Eif2b3  | Eukaryotic translation initiation factor 2B, subunit 3 gamma                   | 195.30  | 1.511 | 1.376 | #   |
| 1372587_at   | Emcn    | Endomucin                                                                      | 437.84  | 0.423 | 0.841 | #†  |
| 1371527_at   | Emp1    | Epithelial membrane protein 1                                                  | 1739.35 | 1.608 | 1.346 | *#† |
| 1386907_at   | Eno3    | Enolase 3, beta, muscle                                                        | 126.47  | 0.908 | 2.101 | *†  |
| 1370047_at   | Enpp1   | Ectonucleotide pyrophosphatase/phosphodiesterase 1                             | 532.84  | 2.289 | 1.784 | *#  |
| 1368536_at   | Enpp2   | Ectonucleotide pyrophosphatase/phosphodiesterase 2                             | 160.41  | 0.497 | 0.860 | #†  |
| 1370845_at   | Entpd2  | Ectonucleoside triphosphate diphosphohydrolase 2                               | 130.66  | 0.647 | 0.906 | #†  |
| 1375729_at   | Epha4   | Eph receptor A4                                                                | 80.77   | 0.603 | 0.833 | #†  |

|              |         |                                                                                         |         |       |       |     |
|--------------|---------|-----------------------------------------------------------------------------------------|---------|-------|-------|-----|
| 1367899_at   | F2r     | Coagulation factor II (thrombin) receptor                                               | 933.73  | 2.318 | 1.497 | *#† |
| 1369182_at   | F3      | Coagulation factor III (thromboplastin, tissue factor)                                  | 140.14  | 1.622 | 1.211 | #   |
| 1368271_a_at | Fabp4   | Fatty acid binding protein 4, adipocyte                                                 | 215.98  | 0.327 | 0.752 | #†  |
| 1379625_at   | Fam164a | Family with sequence similarity 164, member A                                           | 51.64   | 1.600 | 1.098 | #†  |
| 1382143_at   | Farp1   | FERM, RhoGEF (Arhgef) and pleckstrin domain protein 1 (chondrocyte-derived)             | 421.37  | 1.502 | 1.273 | *#  |
| 1372518_at   | Fbln1   | Fibulin 1                                                                               | 1408.58 | 0.586 | 0.870 | #†  |
| 1389533_at   | Fbln2   | Fibulin 2                                                                               | 1068.43 | 1.978 | 1.737 | *#  |
| 1387351_at   | Fbn1    | Fibrillin 1                                                                             | 1629.69 | 1.523 | 1.364 | *#  |
| 1368114_at   | Fgf13   | Fibroblast growth factor 13                                                             | 410.09  | 0.851 | 0.665 | *†  |
| 1373727_at   | Fibin   | Fin bud initiation factor homolog (zebrafish)                                           | 359.67  | 2.134 | 1.384 | #   |
| 1393696_at   | Fibin   | Fin bud initiation factor homolog (zebrafish)                                           | 138.42  | 2.336 | 1.390 | #†  |
| 1389449_at   | Fit1    | Fat-inducing transcript 1                                                               | 226.94  | 0.577 | 0.559 | *#  |
| 1371382_at   | Flna    | Filamin, alpha                                                                          | 2243.95 | 1.728 | 1.296 | #   |
| 1388401_at   | Flnb    | Filamin, beta                                                                           | 301.11  | 1.512 | 1.235 | *#† |
| 1376779_at   | Foxo1   | Forkhead box O1                                                                         | 70.77   | 0.664 | 0.784 | *#  |
| 1379651_at   | Foxp1   | Forkhead box P1                                                                         | 309.88  | 1.749 | 1.236 | *#† |
| 1387843_at   | Fst     | Follistatin                                                                             | 88.55   | 3.289 | 1.553 | *#† |
| 1368821_at   | Fstl1   | Follistatin-like 1                                                                      | 1740.97 | 1.638 | 1.208 | *#† |
| 1368822_at   | Fstl1   | Follistatin-like 1                                                                      | 2373.34 | 1.623 | 1.283 | *#† |
| 1371331_at   | Fstl1   | Follistatin-like 1                                                                      | 2404.92 | 1.584 | 1.241 | *#† |
| 1379440_at   | Fstl3   | Follistatin-like 3 (secreted glycoprotein)                                              | 249.99  | 1.831 | 1.549 | *#  |
| 1368207_at   | Fxyd5   | FXD domain-containing ion transport regulator 5                                         | 565.20  | 2.175 | 1.496 | *#† |
| 1374530_at   | Fzd7    | Frizzled homolog 7 (Drosophila)                                                         | 203.06  | 1.507 | 1.375 | *#  |
| 1388395_at   | G0s2    | G0/G1switch 2                                                                           | 2270.78 | 0.587 | 0.910 | #†  |
| 1374759_at   | Galnt1  | UDP-N-acetyl-alpha-D-galactosamine:polypeptide N-acetylgalactosaminyltransferase-like 1 | 97.59   | 1.635 | 1.320 | #   |
| 1374903_at   | Gcnt2   | Glucosaminyl (N-acetyl) transferase 2, I-branching enzyme                               | 58.99   | 1.520 | 1.039 | #†  |
| 1373504_at   | Glpr1   | GLI pathogenesis-related 1                                                              | 87.26   | 2.550 | 1.318 | #†  |
| 1382616_at   | Gls     | Glutaminase                                                                             | 151.00  | 1.523 | 1.330 | *#  |
| 1367632_at   | Glul    | Glutamate-ammonia ligase (glutamine synthetase)                                         | 977.64  | 0.637 | 0.735 | *#  |
| 1367633_at   | Glul    | Glutamate-ammonia ligase (glutamine synthetase)                                         | 931.58  | 0.536 | 0.701 | *#† |
| 1386870_at   | Glul    | Glutamate-ammonia ligase (glutamine synthetase)                                         | 1566.09 | 0.572 | 0.692 | *#† |
| 1369560_at   | Gpd1    | Glycerol-3-phosphate dehydrogenase 1 (soluble)                                          | 162.95  | 0.551 | 0.834 | #†  |
| 1371363_at   | Gpd1    | Glycerol-3-phosphate dehydrogenase 1 (soluble)                                          | 303.76  | 0.434 | 0.830 | #†  |
| 1388243_at   | Gpr176  | G protein-coupled receptor 176                                                          | 417.43  | 1.761 | 1.075 | #†  |
| 1387241_at   | Gpr88   | G-protein coupled receptor 88                                                           | 97.89   | 0.489 | 0.611 | *#† |
| 1376828_at   | Gprc5a  | G protein-coupled receptor, family C, group 5, member A                                 | 132.32  | 1.583 | 1.629 | *#  |
| 1369113_at   | Grem1   | Gremlin 1, cysteine knot superfamily, homolog (Xenopus laevis)                          | 38.65   | 8.186 | 1.296 | #†  |
| 1378163_at   | Grem2   | Gremlin 2, cysteine knot superfamily, homolog (Xenopus laevis)                          | 127.62  | 0.454 | 0.632 | *#† |
| 1368354_at   | Gstt1   | Glutathione S-transferase theta 1                                                       | 275.41  | 0.512 | 0.790 | *#† |
| 1371942_at   | Gstt3   | Glutathione S-transferase, theta 3                                                      | 215.93  | 0.206 | 0.522 | *#† |
| 1371298_at   | H19     | H19 fetal liver mRNA                                                                    | 894.51  | 0.578 | 0.893 | #†  |
| 1387396_at   | Hamp    | Hepcidin antimicrobial peptide                                                          | 803.58  | 0.560 | 0.510 | *#  |
| 1386080_at   | Hey1    | Hairy/enhancer-of-split related with YRPW motif 1                                       | 175.48  | 0.558 | 0.800 | #†  |
| 1391429_at   | Hfe2    | Hemochromatosis type 2 (juvenile) (human homolog)                                       | 148.25  | 0.486 | 0.574 | *#  |
| 1388193_at   | Hip1    | Huntingtin interacting protein 1                                                        | 462.27  | 1.660 | 1.506 | *#  |
| 1390082_at   | Hip1    | Huntingtin interacting protein 1                                                        | 458.44  | 1.500 | 1.348 | *#  |
| 1392941_at   | Hip1    | Huntingtin interacting protein 1                                                        | 414.06  | 1.537 | 1.430 | *#  |
| 1367816_at   | Hopx    | HOP homeobox                                                                            | 555.07  | 0.637 | 0.797 | #   |
| 1372179_at   | Hpcal1  | Hippocalcin-like 1                                                                      | 730.50  | 1.560 | 1.149 | #†  |
| 1393790_at   | Hrasls  | HRAS-like suppressor                                                                    | 105.25  | 1.722 | 1.080 | #†  |
| 1387233_at   | Hsd17b7 | Hydroxysteroid (17-beta) dehydrogenase 7                                                | 161.76  | 1.203 | 1.561 | *#† |



|              |                      |                                                                                |         |       |       |     |
|--------------|----------------------|--------------------------------------------------------------------------------|---------|-------|-------|-----|
| 1368247_at   | Hspa1a ///<br>Hspa1b | Heat shock 70kD protein 1A /// heat shock 70kD protein 1B (mapped)             | 100.39  | 2.016 | 1.198 | #†  |
| 1370912_at   | Hspa1b               | Heat shock 70kD protein 1B (mapped)                                            | 139.62  | 2.122 | 1.467 | #   |
| 1373515_at   | Hspc159              | Galectin-related protein                                                       | 304.23  | 1.968 | 1.188 | #†  |
| 1376867_at   | Hspc159              | Galectin-related protein                                                       | 138.33  | 2.164 | 1.362 | *#† |
| 1372565_at   | Htra3                | HtrA serine peptidase 3                                                        | 1367.83 | 0.532 | 0.791 | *#† |
| 1375306_at   | Htra3                | HtrA serine peptidase 3                                                        | 575.80  | 0.621 | 0.770 | *#  |
| 1389235_at   | Icam2                | Intercellular adhesion molecule 2                                              | 206.63  | 0.644 | 0.937 | #†  |
| 1368878_at   | Idi1                 | Isopentenyl-diphosphate delta isomerase 1                                      | 1179.32 | 1.382 | 1.542 | *#  |
| 1367795_at   | Ildf1                | Interferon-related developmental regulator 1                                   | 440.19  | 1.514 | 1.505 | --- |
| 1371462_at   | Igfbp4               | Insulin-like growth factor binding protein 4                                   | 1332.63 | 0.558 | 0.945 | #†  |
| 1370960_at   | Igfbp5               | Insulin-like growth factor binding protein 5                                   | 821.30  | 0.347 | 0.457 | *#  |
| 1387347_at   | Igfbp5               | Insulin-like growth factor binding protein 5                                   | 260.75  | 0.638 | 0.699 | *#  |
| 1387348_at   | Igfbp5               | Insulin-like growth factor binding protein 5                                   | 486.01  | 0.382 | 0.473 | *#  |
| 1396152_s_at | Igfbp5               | Insulin-like growth factor binding protein 5                                   | 382.04  | 0.348 | 0.474 | *#  |
| 1390901_at   | Igsl10               | Immunoglobulin superfamily, member 10                                          | 771.36  | 0.524 | 0.850 | #†  |
| 1368375_a_at | Il15                 | Interleukin 15                                                                 | 55.16   | 1.664 | 1.042 | #†  |
| 1387273_at   | Il1rl1               | Interleukin 1 receptor-like 1                                                  | 262.30  | 4.661 | 2.124 | *#† |
| 1380055_at   | Il34                 | Interleukin 34                                                                 | 116.35  | 0.654 | 0.911 | #†  |
| 1387124_at   | Inha                 | Inhibin alpha                                                                  | 171.36  | 1.725 | 3.466 | *#† |
| 1391489_at   | Irgm                 | Immunity-related GTPase family, M                                              | 150.26  | 0.651 | 0.720 | --- |
| 1387144_at   | Itga1                | Integrin alpha 1                                                               | 437.52  | 1.613 | 1.412 | *#  |
| 1383880_at   | Itgav                | Integrin alpha V                                                               | 278.03  | 1.557 | 1.285 | #   |
| 1398358_a_at | Itgb5                | Integrin, beta 5                                                               | 717.99  | 1.653 | 1.377 | --- |
| 1387160_at   | Kcne3                | potassium voltage-gated channel, Isk-related subfamily, gene 3                 | 387.21  | 0.596 | 0.948 | #†  |
| 1370773_a_at | Kcnip2               | Kv channel-interacting protein 2                                               | 126.70  | 0.498 | 0.401 | *#  |
| 1373987_at   | Kcnip2               | Kv channel-interacting protein 2                                               | 320.03  | 0.428 | 0.265 | *#  |
| 1368911_at   | Kcnj8                | Potassium inwardly-rectifying channel, subfamily J, member 8                   | 161.79  | 0.467 | 1.016 | #†  |
| 1367948_a_at | Kdr                  | Kinase insert domain protein receptor                                          | 616.75  | 0.518 | 0.848 | #†  |
| 1391063_at   | Kif23                | Kinesin family member 23                                                       | 112.02  | 1.567 | 1.222 | #†  |
| 1378197_at   | KIFC2                | Kinesin family member C2                                                       | 127.03  | 0.644 | 0.749 | *#  |
| 1381396_s_at | Klf15                | Kruppel-like factor 15                                                         | 232.62  | 0.624 | 0.673 | *#  |
| 1383300_at   | Klhl24               | Kelch-like 24 (Drosophila)                                                     | 576.21  | 0.661 | 0.704 | *#  |
| 1388155_at   | Krt18                | Keratin 18                                                                     | 54.13   | 1.637 | 1.526 | --- |
| 1379340_at   | Lamc2                | Laminin, gamma 2                                                               | 212.79  | 1.353 | 1.835 | *   |
| 1390207_at   | Lats2                | Large tumor suppressor 2                                                       | 675.35  | 1.546 | 1.268 | *#† |
| 1387011_at   | Lcn2                 | Lipocalin 2                                                                    | 4187.32 | 0.613 | 0.947 | #†  |
| 1373233_at   | Lhfp12               | Lipoma HMGIC fusion partner-like 2                                             | 436.54  | 0.581 | 0.752 | *#† |
| 1378179_a_at | Lhfp12               | Lipoma HMGIC fusion partner-like 2                                             | 288.89  | 0.638 | 0.813 | #†  |
| 1376700_at   | Lima1                | LIM domain and actin binding 1                                                 | 425.88  | 1.504 | 1.298 | *#  |
| 1389464_at   | Lnx1                 | Ligand of numb-protein X 1                                                     | 133.36  | 0.531 | 0.583 | *#  |
| 1374171_at   | LOC100360403         | ATP-binding cassette, sub-family C, member 9-like                              | 810.28  | 0.598 | 0.771 | *#† |
| 1374932_at   | LOC100361444         | rCG31799-like                                                                  | 52.80   | 0.967 | 1.692 | *†  |
| 1375706_at   | LOC100361913         | rCG54286-like                                                                  | 470.44  | 1.540 | 1.196 | #†  |
| 1372647_at   | LOC100363743         | Proline arginine-rich end leucine-rich repeat protein-like                     | 326.06  | 2.254 | 1.161 | #†  |
| 1376151_a_at | LOC100365106         | rCG32755-like                                                                  | 205.36  | 0.646 | 0.810 | *#† |
| 1374029_at   | LOC100365118         | rCG54747-like                                                                  | 183.46  | 1.831 | 1.264 | #†  |
| 1393210_at   | LOC100365207         | Extracellular matrix protein 2-like                                            | 210.70  | 0.631 | 0.684 | *#  |
| 1372856_at   | LOC363331            | Similar to plasma membrane associated protein, S3-12                           | 266.69  | 0.661 | 0.774 | *#  |
| 1391030_at   | LOC500591            | Similar to calmodulin-binding transcription activator 1                        | 513.92  | 1.913 | 1.685 | --- |
| 1397536_at   | LOC500591            | Similar to calmodulin-binding transcription activator 1                        | 268.81  | 1.723 | 1.551 | *#  |
| 1374677_at   | LOC684425            | Similar to Adenylosuccinate synthetase isozyme 1 (Adenylosuccinate synthetase, | 456.14  | 0.624 | 0.602 | *#  |

|              |           |                                                                                                                           |         |       |       |     |
|--------------|-----------|---------------------------------------------------------------------------------------------------------------------------|---------|-------|-------|-----|
|              |           | muscle isozyme) (IMP--aspartate ligase 1) (AdSS 1) (AMPSase 1)                                                            |         |       |       |     |
| 1384406_at   | LOC685243 | Similar to C-C chemokine receptor type 11 (C-C CKR-11) (CC-CKR-11) (CCR-11) (Chemokine receptor-like 1) (CCRL1) (CCX CKR) | 111.86  | 1.758 | 1.228 | #†  |
| 1398732_at   | LOC688273 | Hypothetical protein LOC688273                                                                                            | 143.39  | 1.932 | 1.786 | *#  |
| 1388763_at   | LOC690976 | Similar to Calponin-2 (Calponin H2, smooth muscle) (Neutral calponin)                                                     | 1667.88 | 1.529 | 1.310 | #   |
| 1368171_at   | Lox       | Lysyl oxidase                                                                                                             | 754.14  | 2.225 | 1.860 | *#  |
| 1368172_a_at | Lox       | Lysyl oxidase                                                                                                             | 425.13  | 2.155 | 1.698 | *#† |
| 1388902_at   | Lox1      | Lysyl oxidase-like 1                                                                                                      | 1323.05 | 1.621 | 1.490 | --- |
| 1374626_at   | Lrg1      | Leucine rich alpha-2-glycoprotein 1                                                                                       | 100.42  | 0.590 | 0.903 | #†  |
| 1395472_at   | Lrrc17    | Leucine rich repeat containing 17                                                                                         | 1438.28 | 0.561 | 0.714 | *#† |
| 1393460_at   | Lrrc33    | Leucine rich repeat containing 33                                                                                         | 155.80  | 0.615 | 0.813 | *#† |
| 1373755_at   | Lrrc39    | Leucine rich repeat containing 39                                                                                         | 294.91  | 0.775 | 0.617 | *   |
| 1396140_at   | Lrrc39    | Leucine rich repeat containing 39                                                                                         | 176.03  | 0.691 | 0.664 | *#  |
| 1384178_at   | Lrrc4b    | Leucine rich repeat containing 4B                                                                                         | 337.07  | 1.376 | 1.734 | *#† |
| 1389351_at   | Lrrfp1    | Leucine rich repeat (in FLII) interacting protein 1                                                                       | 333.83  | 1.798 | 1.346 | *#† |
| 1367912_at   | Ltbp1     | Latent transforming growth factor beta binding protein 1                                                                  | 82.40   | 2.850 | 1.610 | *#† |
| 1368448_at   | Ltbp2     | Latent transforming growth factor beta binding protein 2                                                                  | 379.11  | 2.203 | 1.404 | *#† |
| 1382192_at   | Lyve1     | Lymphatic vessel endothelial hyaluronan receptor 1                                                                        | 163.60  | 0.569 | 0.984 | #†  |
| 1382732_at   | Lyve1     | Lymphatic vessel endothelial hyaluronan receptor 1                                                                        | 135.80  | 0.571 | 0.870 | #†  |
| 1387165_at   | Maf       | v-maf musculoaponeurotic fibrosarcoma oncogene homolog (avian)                                                            | 176.23  | 0.530 | 0.762 | #†  |
| 1368514_at   | Maob      | Monoamine oxidase B                                                                                                       | 118.79  | 0.586 | 0.718 | *#  |
| 1371003_at   | Map1b     | Microtubule-associated protein 1B                                                                                         | 62.74   | 1.625 | 1.402 | --- |
| 1373363_at   | Map1b     | Microtubule-associated protein 1B                                                                                         | 778.94  | 1.558 | 1.460 | --- |
| 1395357_at   | Map1b     | Microtubule-associated protein 1B                                                                                         | 204.36  | 1.959 | 1.802 | *#  |
| 1368871_at   | Map3k1    | Mitogen activated protein kinase kinase kinase 1                                                                          | 388.50  | 0.584 | 0.740 | *#† |
| 1371087_a_at | Map6      | Microtubule-associated protein 6                                                                                          | 149.98  | 1.515 | 1.402 | --- |
| 1389543_at   | Masp1     | Mannan-binding lectin serine peptidase 1                                                                                  | 207.17  | 0.643 | 0.572 | *#  |
| 1367682_at   | Mdk       | Midkine                                                                                                                   | 1181.61 | 0.623 | 0.776 | #   |
| 1371479_at   | Mettl7a   | Methyltransferase like 7A                                                                                                 | 337.97  | 0.542 | 0.693 | *#  |
| 1371815_at   | Mfap2     | Microfibrillar-associated protein 2                                                                                       | 266.85  | 0.446 | 0.704 | *#† |
| 1373674_at   | Mfap5     | Microfibrillar associated protein 5                                                                                       | 62.55   | 3.116 | 1.376 | *#† |
| 1392547_at   | MGC105649 | Hypothetical LOC302884                                                                                                    | 67.52   | 1.228 | 1.504 | *   |
| 1373333_at   | MGC109340 | Similar to Microsomal signal peptidase 23 kDa subunit (SPase 22 kDa subunit) (SPC22/23)                                   | 48.05   | 1.516 | 1.250 | #   |
| 1367612_at   | Mgst1     | Microsomal glutathione S-transferase 1                                                                                    | 4440.09 | 0.560 | 0.739 | *#† |
| 1368590_at   | Mmp16     | Matrix metalloproteinase 16                                                                                               | 133.69  | 1.604 | 1.276 | #   |
| 1371237_a_at | Mt1a      | Metallothionein 1a                                                                                                        | 7838.12 | 0.644 | 0.818 | *#† |
| 1397644_at   | Mtap      | Methylthioadenosine phosphorylase                                                                                         | 230.46  | 1.629 | 1.389 | *#  |
| 1373032_at   | Mustn1    | Musculoskeletal, embryonic nuclear protein 1                                                                              | 115.09  | 2.112 | 1.419 | *#† |
| 1368308_at   | Myc       | Myelocytomatosis oncogene                                                                                                 | 327.47  | 1.684 | 1.644 | *#  |
| 1370158_at   | Myh10     | Myosin, heavy chain 10, non-muscle                                                                                        | 1505.17 | 1.512 | 1.081 | #†  |
| 1370896_a_at | Myh11     | Myosin, heavy chain 11, smooth muscle                                                                                     | 133.94  | 1.736 | 1.018 | #†  |
| 1387049_at   | Myh6      | Myosin, heavy chain 6, cardiac muscle, alpha                                                                              | 3805.14 | 0.618 | 0.796 | *#† |
| 1396165_at   | Myh6      | Myosin, heavy chain 6, cardiac muscle, alpha                                                                              | 1202.01 | 0.626 | 0.811 | #   |
| 1371725_at   | Myh9      | Myosin, heavy chain 9, non-muscle                                                                                         | 1805.22 | 1.683 | 1.275 | #   |
| 1387402_at   | Myh9      | Myosin, heavy chain 9, non-muscle                                                                                         | 760.96  | 1.723 | 1.311 | #   |
| 1388917_at   | Myo1d     | Myosin ID                                                                                                                 | 163.54  | 2.013 | 1.211 | #†  |
| 1375857_at   | Myof      | Myoferlin                                                                                                                 | 806.34  | 1.788 | 1.368 | *#† |
| 1375861_at   | Nap1l5    | Nucleosome assembly protein 1-like 5                                                                                      | 96.54   | 1.222 | 1.894 | *#† |
| 1384009_at   | Narf      | Nuclear prelamin A recognition factor                                                                                     | 129.38  | 0.627 | 0.891 | #†  |
| 1383938_at   | Ncoa7     | Nuclear receptor coactivator 7                                                                                            | 371.76  | 0.659 | 0.914 | #†  |
| 1374650_at   | Nedd9     | Neural precursor cell expressed, developmentally down-regulated 9                                                         | 293.37  | 1.726 | 1.136 | #†  |

|              |          |                                                                                                  |         |       |       |     |
|--------------|----------|--------------------------------------------------------------------------------------------------|---------|-------|-------|-----|
| 1396053_at   | Nedd9    | Neural precursor cell expressed, developmentally down-regulated 9                                | 106.72  | 1.873 | 1.218 | #†  |
| 1389538_at   | Nfkbia   | Nuclear factor of kappa light polypeptide gene enhancer in B-cells inhibitor, alpha              | 766.87  | 0.587 | 0.844 | #†  |
| 1370408_at   | Nid67    | Putative small membrane protein NID67                                                            | 196.48  | 1.266 | 1.528 | *   |
| 1392686_at   | Nkd2     | Naked cuticle homolog 2 (Drosophila)                                                             | 60.67   | 2.247 | 1.059 | #†  |
| 1373839_at   | Nope     | Neighbor of Punc E11                                                                             | 772.10  | 0.576 | 0.818 | *#† |
| 1371166_at   | Nos3     | Nitric oxide synthase 3, endothelial cell                                                        | 139.16  | 0.589 | 0.896 | #†  |
| 1368883_at   | Nov      | Nephroblastoma overexpressed gene                                                                | 331.81  | 2.737 | 1.062 | #†  |
| 1376362_at   | Nptxr    | Neuronal pentraxin receptor                                                                      | 75.57   | 2.035 | 1.493 | *#† |
| 1387154_at   | Npy      | Neuropeptide Y                                                                                   | 1004.02 | 0.580 | 0.726 | *#† |
| 1386935_at   | Nr4a1    | Nuclear receptor subfamily 4, group A, member 1                                                  | 149.72  | 1.612 | 1.289 | #   |
| 1369200_at   | Nt5e     | 5' nucleotidase, ecto                                                                            | 400.52  | 1.390 | 1.830 | *#† |
| 1384112_at   | Nt5e     | 5' nucleotidase, ecto                                                                            | 210.27  | 1.392 | 1.724 | *#† |
| 1387267_at   | Ntf3     | Neurotrophin 3                                                                                   | 107.82  | 0.681 | 0.618 | *#  |
| 1383614_at   | Nuak2    | NUAK family, SNF1-like kinase, 2                                                                 | 130.27  | 1.502 | 0.819 | #†  |
| 1370000_at   | Nucb2    | Nucleobindin 2                                                                                   | 940.77  | 1.596 | 1.333 | #   |
| 1392579_at   | Obfc2a   | Oligonucleotide/oligosaccharide-binding fold containing 2A                                       | 373.63  | 0.593 | 0.733 | *#† |
| 1369008_a_at | Olfm1    | Olfactomedin 1                                                                                   | 111.15  | 2.030 | 1.386 | #†  |
| 1382134_at   | Olfml1   | Olfactomedin-like 1                                                                              | 428.92  | 0.578 | 0.659 | *#† |
| 1383453_at   | Olfml1   | Olfactomedin-like 1                                                                              | 482.60  | 0.575 | 0.671 | *#  |
| 1382072_at   | Olfml2a  | Olfactomedin-like 2A                                                                             | 106.73  | 0.487 | 0.832 | #†  |
| 1368683_at   | Olr1     | Oxidized low density lipoprotein (lectin-like) receptor 1                                        | 192.02  | 2.164 | 1.363 | #†  |
| 1393129_at   | P4ha3    | Procollagen-proline, 2-oxoglutarate 4-dioxygenase (proline 4-hydroxylase), alpha polypeptide III | 249.93  | 2.361 | 1.387 | *#† |
| 1389093_at   | Pak1     | P21 (CDKN1A)-activated kinase 1                                                                  | 87.42   | 1.722 | 1.378 | *#  |
| 1394966_at   | Pap2d    | Phosphatidic acid phosphatase type 2                                                             | 91.44   | 1.814 | 1.837 | *#  |
| 1368702_at   | Pawr     | PRKC, apoptosis, WT1, regulator                                                                  | 162.05  | 1.654 | 0.918 | #†  |
| 1385229_at   | Pcdh20   | Protocadherin 20                                                                                 | 41.27   | 1.712 | 1.123 | #†  |
| 1373368_at   | PCOLCE2  | Procollagen C-endopeptidase enhancer 2                                                           | 69.23   | 1.813 | 1.358 | *#† |
| 1390912_at   | Pcp4l1   | Purkinje cell protein 4-like 1                                                                   | 155.54  | 0.678 | 0.660 | *#  |
| 1392773_at   | Pcsk5    | Proprotein convertase subtilisin/kexin type 5                                                    | 125.19  | 0.629 | 0.728 | *#  |
| 1393467_at   | Pcsk5    | Proprotein convertase subtilisin/kexin type 5                                                    | 120.77  | 0.448 | 0.730 | *#† |
| 1370427_at   | Pdgfra   | Platelet-derived growth factor alpha polypeptide                                                 | 253.53  | 1.528 | 1.240 | #   |
| 1370941_at   | Pdgfra   | Platelet derived growth factor receptor, alpha polypeptide                                       | 2710.11 | 0.583 | 0.800 | *#† |
| 1367892_at   | Pdk2     | Pyruvate dehydrogenase kinase, isozyme 2                                                         | 870.82  | 0.625 | 0.658 | *#  |
| 1367946_at   | Pdlim1   | PDZ and LIM domain 1                                                                             | 1105.55 | 1.516 | 1.187 | --- |
| 1370347_at   | Pdlim7   | PDZ and LIM domain 7                                                                             | 390.52  | 1.797 | 1.436 | *#  |
| 1371441_at   | Pea15a   | PhosPhoprotein enriched in astrocytes 15A                                                        | 572.09  | 1.503 | 1.410 | *#  |
| 1371545_at   | Pecam1   | Platelet/endothelial cell adhesion molecule 1                                                    | 176.04  | 0.629 | 0.845 | *#† |
| 1367949_at   | Penk1    | Proenkephalin 1                                                                                  | 3911.72 | 0.419 | 1.088 | #†  |
| 1386961_at   | Pfkm     | Phosphofructokinase, muscle                                                                      | 655.02  | 0.625 | 0.663 | *#  |
| 1367951_at   | Pgam2    | Phosphoglycerate mutase 2 (muscle)                                                               | 288.20  | 0.613 | 0.623 | *#  |
| 1382303_at   | Phactr1  | Phosphatase and actin regulator 1                                                                | 104.45  | 0.690 | 0.640 | --- |
| 1368860_at   | Phlda1   | Pleckstrin homology-like domain, family A, member 1                                              | 241.84  | 1.224 | 1.500 | *#† |
| 1383749_at   | Phospho1 | Phosphatase, orphan 1                                                                            | 260.77  | 0.657 | 0.743 | *#  |
| 1388525_at   | Pik3ip1  | Phosphoinositide-3-kinase interacting protein 1                                                  | 390.00  | 0.822 | 0.647 | *   |
| 1372199_at   | Pink1    | PTEN induced putative kinase 1                                                                   | 413.24  | 0.660 | 0.543 | *#† |
| 1372475_at   | Pink1    | PTEN induced putative kinase 1                                                                   | 1640.96 | 0.700 | 0.605 | *#† |
| 1371600_at   | Pkig     | Protein kinase inhibitor, gamma                                                                  | 1399.16 | 1.666 | 0.941 | #†  |
| 1385182_at   | Pkp1     | Plakophilin 1                                                                                    | 78.00   | 1.591 | 1.332 | *#† |
| 1368128_at   | Pla2g2a  | Phospholipase A2, group IIA (platelets, synovial fluid)                                          | 2864.70 | 0.288 | 0.848 | #†  |
| 1384558_at   | Plac9    | Placenta-specific 9                                                                              | 193.00  | 2.346 | 1.221 | #†  |
| 1387675_at   | Plau     | Plasminogen activator, urokinase                                                                 | 225.38  | 0.612 | 1.068 | #†  |

|            |            |                                                                          |         |       |       |     |
|------------|------------|--------------------------------------------------------------------------|---------|-------|-------|-----|
| 1398287_at | Plau       | Plasminogen activator, urokinase                                         | 101.67  | 0.550 | 0.948 | #†  |
| 1372897_at | Plod2      | Procollagen lysine, 2-oxoglutarate 5-dioxygenase 2                       | 1693.85 | 1.908 | 1.519 | *#† |
| 1369029_at | Plscr1     | Phospholipid scramblase 1                                                | 137.69  | 2.067 | 1.728 | *#  |
| 1391435_at | Pltp       | Phospholipid transfer protein                                            | 744.65  | 0.381 | 0.583 | *#† |
| 1389809_at | Pmepa1     | Prostate transmembrane Protein, androgen induced 1                       | 985.70  | 2.019 | 1.524 | *#  |
| 1392534_at | Pmepa1     | Prostate transmembrane Protein, androgen induced 1                       | 1075.58 | 2.116 | 1.580 | *#  |
| 1370950_at | Ppap2b     | Phosphatidic acid phosphatase type 2B                                    | 374.32  | 0.605 | 0.738 | *#† |
| 1372531_at | Ppfbp2     | PTPRF interacting Protein, binding Protein 2 (liprin beta 2)             | 102.95  | 0.579 | 0.592 | *#  |
| 1367813_at | Ppp1r14a   | Protein phosphatase 1, regulatory (inhibitor) subunit 14A                | 114.32  | 2.228 | 1.075 | #†  |
| 1390839_at | Pqlc3      | PQ loop repeat containing 3                                              | 511.15  | 2.196 | 1.330 | *#† |
| 1387886_at | Prelp      | Proline arginine-rich end leucine-rich repeat Protein                    | 334.17  | 1.863 | 1.105 | #†  |
| 1379369_at | Prickle1   | Prickle homolog 1 (Drosophila)                                           | 779.48  | 1.528 | 1.367 | *#  |
| 1373152_at | Prss23     | Protease, serine, 23                                                     | 1464.80 | 1.623 | 1.485 | *#  |
| 1367851_at | Ptgds      | Prostaglandin D2 synthase (brain)                                        | 217.69  | 0.619 | 0.572 | *#  |
| 1368014_at | Ptges      | Prostaglandin E synthase                                                 | 97.80   | 0.643 | 0.833 | #†  |
| 1368259_at | Ptgs1      | Prostaglandin-endoperoxide synthase 1                                    | 67.35   | 1.942 | 1.155 | #†  |
| 1370214_at | Pvalb      | Parvalbumin                                                              | 415.60  | 0.293 | 0.663 | #†  |
| 1370177_at | PVR        | Poliiovirus receptor                                                     | 231.60  | 1.442 | 1.597 | *   |
| 1389873_at | Pycard     | PYD and CARD domain containing                                           | 267.68  | 0.962 | 0.658 | *†  |
| 1370061_at | Rab3b      | RAB3B, member RAS oncogene family                                        | 163.53  | 0.519 | 0.500 | *#  |
| 1384528_at | Rai14      | Retinoic acid induced 14                                                 | 98.18   | 2.027 | 1.619 | *#  |
| 1389263_at | Rai14      | Retinoic acid induced 14                                                 | 748.35  | 1.859 | 1.612 | *#  |
| 1367791_at | Ramp1      | Receptor (G protein-coupled) activity modifying protein 1                | 225.90  | 1.515 | 0.922 | #†  |
| 1370942_at | Rasa3      | RAS p21 protein activator 3                                              | 555.39  | 0.570 | 0.741 | *#† |
| 1388970_at | Rasip1     | Ras interacting protein 1                                                | 147.18  | 0.630 | 0.751 | *#  |
| 1381341_at | rCG_43687  | Hypothetical protein LOC688459                                           | 87.95   | 1.730 | 1.360 | *#  |
| 1374448_at | Reck       | Reversion-inducing-cysteine-rich protein with kazal motifs               | 545.13  | 1.502 | 1.230 | #   |
| 1368238_at | Reg3b      | Regenerating islet-derived 3 beta                                        | 5435.06 | 0.461 | 0.486 | *#  |
| 1368080_at | Rgc32      | Response gene to complement 32                                           | 132.10  | 2.200 | 1.255 | *#† |
| 1377011_at | RGD1307034 | Similar to hypothetical protein CG003                                    | 271.51  | 1.638 | 1.424 | *#  |
| 1376645_at | RGD1307396 | Similar to RIKEN cDNA 6330406115                                         | 290.78  | 1.827 | 1.438 | #   |
| 1372848_at | RGD1310269 | Hypothetical LOC314472                                                   | 275.28  | 0.542 | 0.763 | *#† |
| 1372805_at | RGD1310444 | LOC363015                                                                | 180.75  | 1.609 | 1.306 | *#  |
| 1393015_at | RGD1310587 | Similar to hypothetical protein FLJ14146                                 | 223.83  | 0.662 | 0.843 | *#† |
| 1372293_at | RGD1562059 | Similar to RIKEN cDNA 1110038F21                                         | 4050.12 | 1.979 | 1.797 | --- |
| 1377867_at | RGD1562284 | Similar to Glutaminyl-peptide cyclotransferase precursor (QC)            | 144.01  | 1.647 | 1.477 | *#  |
| 1389241_at | RGD1562326 | Similar to ubiquitin-protein ligase E3-alpha                             | 236.82  | 1.509 | 1.289 | #   |
| 1383398_at | RGD1564327 | Similar to integrin alpha 8                                              | 267.80  | 1.502 | 1.065 | #†  |
| 1385354_at | RGD1564327 | Similar to integrin alpha 8                                              | 141.38  | 1.706 | 1.122 | #†  |
| 1393171_at | RGD1564799 | Similar to transmembrane 4 superfamily member 10                         | 240.47  | 1.530 | 1.257 | *#† |
| 1376937_at | RGD1565927 | Similar to 4631422O05Rik protein                                         | 248.31  | 2.063 | 1.377 | #†  |
| 1371731_at | RGD1566215 | Similar to Coatomer gamma-2 subunit (Gamma-2 coat protein) (Gamma-2 COP) | 1589.68 | 0.449 | 0.662 | *#† |
| 1368144_at | Rgs2       | Regulator of G-protein signaling 2                                       | 319.43  | 2.043 | 2.129 | *#  |
| 1387074_at | Rgs2       | Regulator of G-protein signaling 2                                       | 745.16  | 2.062 | 2.136 | *#  |
| 1368505_at | Rgs4       | Regulator of G-protein signaling 4                                       | 168.67  | 2.019 | 1.180 | #†  |
| 1368506_at | Rgs4       | Regulator of G-protein signaling 4                                       | 118.13  | 1.830 | 1.150 | #†  |
| 1381279_at | Ripk2      | Receptor-interacting serine-threonine kinase 2                           | 216.58  | 1.536 | 1.310 | #   |
| 1394077_at | Rnd3       | Rho family GTPase 3                                                      | 467.99  | 1.534 | 1.436 | --- |
| 1367862_at | Rrad       | Ras-related associated with diabetes                                     | 1028.00 | 0.886 | 0.408 | *†  |
| 1373427_at | Rragd      | Ras-related GTP binding D                                                | 150.62  | 0.742 | 0.576 | *   |
| 1368914_at | Runx1      | Runt related transcription factor 1                                      | 118.15  | 1.864 | 1.349 | *#† |
| 1367661_at | S100a6     | S100 calcium binding protein A6                                          | 3796.99 | 1.698 | 1.286 | #†  |

|              |              |                                                                                        |         |       |       |     |
|--------------|--------------|----------------------------------------------------------------------------------------|---------|-------|-------|-----|
| 1376150_at   | S1pr3        | Sphingosine-1-phosphate receptor 3                                                     | 631.72  | 0.647 | 0.925 | #†  |
| 1384707_at   | Scara5       | Scavenger receptor class A, member 5 (putative)                                        | 55.64   | 1.756 | 1.343 | *#† |
| 1370355_at   | Scd1         | Stearoyl-Coenzyme A desaturase 1                                                       | 379.13  | 1.809 | 2.071 | *#  |
| 1376319_at   | Sema3c       | Sema domain, immunoglobulin domain (Ig), short basic domain, secreted, (semaphorin) 3C | 655.02  | 2.546 | 2.638 | *#  |
| 1389353_at   | Sema6d       | Sema domain, transmembrane domain (TM), and cytoplasmic domain, (semaphorin) 6D        | 332.47  | 0.538 | 0.821 | #†  |
| 1398986_at   | Serinc3      | Serine incorporator 3                                                                  | 1442.63 | 1.519 | 1.070 | #†  |
| 1368224_at   | Serpina3n    | Serine (or cysteine) peptidase inhibitor, clade A, member 3N                           | 135.49  | 0.455 | 1.176 | #†  |
| 1368519_at   | Serpine1     | Serine (or cysteine) peptidase inhibitor, clade E, member 1                            | 131.30  | 6.782 | 2.265 | *#† |
| 1392264_s_at | Serpine1     | Serine (or cysteine) peptidase inhibitor, clade E, member 1                            | 78.74   | 3.997 | 1.700 | #†  |
| 1372254_at   | Serping1     | Serine (or cysteine) peptidase inhibitor, clade G, member 1                            | 2494.00 | 0.624 | 0.838 | #†  |
| 1391537_at   | Sertad4      | SERTA domain containing 4                                                              | 366.52  | 1.648 | 1.244 | *#† |
| 1382878_at   | Sfrp1        | Secreted frizzled-related protein 1                                                    | 273.88  | 1.267 | 1.644 | --- |
| 1383266_at   | Sfrp1        | Secreted frizzled-related protein 1                                                    | 65.71   | 1.635 | 1.995 | *#  |
| 1396614_at   | Sfrp2        | Secreted frizzled-related protein 2                                                    | 715.83  | 0.655 | 0.822 | #   |
| 1370419_a_at | Sh3kbp1      | SH3-domain kinase binding protein 1                                                    | 1288.11 | 0.519 | 0.817 | *#† |
| 1387957_a_at | Sh3kbp1      | SH3-domain kinase binding protein 1                                                    | 1766.62 | 0.552 | 0.907 | #†  |
| 1373521_at   | Sh3tc2       | SH3 domain and tetratricopeptide repeats 2                                             | 98.16   | 1.519 | 1.233 | *#† |
| 1368965_at   | Slc16a3      | Solute carrier family 16, member 3 (monocarboxylic acid transporter 4)                 | 579.54  | 1.411 | 2.080 | *†  |
| 1368565_at   | Slc1a3       | Solute carrier family 1 (glial high affinity glutamate transporter), member 3          | 231.06  | 1.580 | 1.125 | #†  |
| 1398295_at   | Slc29a1      | Solute carrier family 29 (nucleoside transporters), member 1                           | 206.01  | 1.793 | 1.442 | *#† |
| 1372326_at   | Slc2a3       | Solute carrier family 2 (facilitated glucose transporter), member 3                    | 67.87   | 1.524 | 1.512 | *#  |
| 1369074_at   | Slc38a4      | Solute carrier family 38, member 4                                                     | 102.49  | 1.776 | 1.152 | #†  |
| 1373953_at   | Slc4a1ap     | Solute carrier family 4 (anion exchanger), member 1, adaptor protein                   | 714.19  | 0.763 | 0.500 | *†  |
| 1384302_at   | Slc6a17      | Solute carrier family 6 (neurotransmitter transporter), member 17                      | 194.82  | 0.549 | 0.683 | *#  |
| 1368582_at   | Slc7a3       | Solute carrier family 7 (cationic amino acid transporter, y+ system), member 3         | 162.91  | 1.766 | 1.385 | *#  |
| 1392965_a_at | Smoc2        | SPARC related modular calcium binding 2                                                | 286.32  | 0.680 | 0.487 | *#† |
| 1373865_at   | Snap91       | Synaptosomal-associated protein 91                                                     | 280.71  | 2.536 | 1.565 | #   |
| 1380250_at   | Sned1        | Sushi, nidogen and EGF-like domains 1                                                  | 482.62  | 0.215 | 0.546 | *#† |
| 1368596_at   | Snf1lk       | SNF1-like kinase                                                                       | 267.02  | 1.038 | 1.587 | *†  |
| 1379271_at   | Socs5        | Suppressor of cytokine signaling 5                                                     | 967.78  | 1.510 | 1.313 | *#† |
| 1381971_at   | Sox18        | SRY (sex determining region Y)-box 18                                                  | 292.74  | 0.485 | 0.908 | #†  |
| 1386865_at   | Sparcl1      | SPARC-like 1 (hevin)                                                                   | 314.25  | 0.535 | 0.906 | #†  |
| 1374168_at   | Sphkap       | SPHK1 interactor, AKAP domain containing                                               | 525.13  | 0.458 | 0.551 | *#  |
| 1370847_at   | Spon2        | Spondin 2, extracellular matrix protein                                                | 632.00  | 0.555 | 0.682 | *#  |
| 1379380_at   | Spry1        | Sprouty homolog 1, antagonist of FGF signaling (Drosophila)                            | 325.43  | 1.737 | 1.224 | #†  |
| 1370228_at   | Srprb /// Tf | Signal recognition particle receptor, B subunit /// transferrin                        | 96.58   | 0.650 | 0.916 | #†  |
| 1373000_at   | Srpx2        | Sushi-repeat-containing protein, X-linked 2                                            | 416.04  | 2.562 | 1.301 | #†  |
| 1396101_at   | Stc1         | Stanniocalcin 1                                                                        | 251.64  | 1.569 | 0.855 | #†  |
| 1393706_at   | Steap1       | Six transmembrane epithelial antigen of the prostate 1                                 | 387.18  | 1.515 | 1.405 | --- |
| 1385397_at   | Steap4       | STEAP family member 4                                                                  | 239.69  | 0.225 | 0.463 | #   |
| 1390107_at   | Syt12        | Synaptotagmin-like 2                                                                   | 129.52  | 1.926 | 0.963 | #†  |
| 1387138_at   | Tac2         | Tachykinin 2                                                                           | 226.21  | 0.458 | 1.052 | #†  |
| 1367570_at   | Tagln        | Transgelin                                                                             | 1122.23 | 4.336 | 1.951 | #   |
| 1383401_at   | Tes          | Testis derived transcript                                                              | 219.21  | 1.859 | 1.306 | #†  |
| 1389409_at   | Tes          | Testis derived transcript                                                              | 52.23   | 1.547 | 1.310 | --- |
| 1367859_at   | Tgfb3        | Transforming growth factor, beta 3                                                     | 453.97  | 2.000 | 1.356 | #   |
| 1369653_at   | Tgfb2        | Transforming growth factor, beta receptor II                                           | 627.68  | 0.621 | 0.717 | *#  |
| 1388497_at   | Them2        | Thioesterase superfamily member 2                                                      | 494.69  | 0.655 | 0.661 | *#  |
| 1369652_at   | Thy1         | Thy-1 cell surface antigen                                                             | 58.17   | 1.511 | 1.109 | #†  |
| 1372926_at   | Timp3        | TIMP metalloproteinase inhibitor 3                                                     | 103.30  | 1.943 | 1.529 | *#  |
| 1375138_at   | Timp3        | TIMP metalloproteinase inhibitor 3                                                     | 433.86  | 1.796 | 1.322 | *#† |

|              |               |                                                                    |         |       |       |     |
|--------------|---------------|--------------------------------------------------------------------|---------|-------|-------|-----|
| 1367650_at   | Tinag1        | Tubulointerstitial nephritis antigen-like 1                        | 223.25  | 1.733 | 1.702 | --- |
| 1392280_at   | Tlr2          | Toll-like receptor 2                                               | 224.70  | 0.620 | 0.712 | *#  |
| 1390042_at   | Tmem140       | Transmembrane protein 140                                          | 193.57  | 0.615 | 0.725 | *#† |
| 1373204_at   | Tmem176a      | Transmembrane protein 176A                                         | 914.46  | 0.373 | 0.624 | *#† |
| 1368840_at   | Tmem176b      | Transmembrane protein 176B                                         | 2155.28 | 0.479 | 0.669 | *#  |
| 1376106_at   | Tmem178       | Transmembrane protein 178                                          | 572.08  | 0.418 | 0.793 | *#† |
| 1376623_at   | Tmem204       | Transmembrane protein 204                                          | 90.50   | 1.511 | 0.996 | *#† |
| 1377448_at   | Tmem38a       | Transmembrane protein 38a                                          | 248.17  | 0.651 | 0.837 | *#† |
| 1389583_at   | Tmem82        | Transmembrane protein 82                                           | 126.92  | 0.695 | 0.596 | --- |
| 1372156_at   | Tmem97        | Transmembrane protein 97                                           | 762.23  | 1.357 | 1.530 | *#  |
| 1373401_at   | Tnc           | Tenascin C                                                         | 289.54  | 2.387 | 1.364 | #†  |
| 1369407_at   | Tnfrsf11b     | Tumor necrosis factor receptor superfamily, member 11b             | 287.92  | 2.589 | 1.410 | #   |
| 1388145_at   | Tnxa /// Tnxb | Tenascin XA /// tenascin XB                                        | 296.62  | 0.297 | 0.691 | *#† |
| 1370287_a_at | Tpm1          | tTopomyosin 1, alpha                                               | 702.33  | 2.505 | 1.497 | *#† |
| 1372219_at   | Tpm2          | Tropomyosin 2                                                      | 1632.63 | 2.257 | 1.271 | #†  |
| 1368838_at   | Tpm4          | Tropomyosin 4                                                      | 1828.01 | 1.557 | 1.305 | *#  |
| 1371653_at   | Tpm4          | Tropomyosin 4                                                      | 3012.89 | 1.713 | 1.451 | *#  |
| 1385899_at   | Trim16        | Tripartite motif-containing 16                                     | 68.61   | 1.685 | 1.424 | #   |
| 1375278_at   | Trim2         | Tripartite motif-containing 2                                      | 345.55  | 0.642 | 0.731 | *#  |
| 1370139_a_at | Trpc6         | Transient receptor potential cation channel, subfamily C, member 6 | 23.28   | 2.997 | 1.123 | #†  |
| 1372286_at   | Tspan6        | Tetraspanin 6                                                      | 1285.92 | 1.522 | 1.279 | *#  |
| 1371702_at   | Tspan7        | Tetraspanin 7                                                      | 1171.27 | 0.625 | 0.782 | *#† |
| 1370881_at   | Tst           | Thiosulfate sulfurtransferase, mitochondrial                       | 554.95  | 0.656 | 0.779 | *#† |
| 1371618_s_at | Tubb3         | Tubulin, beta 3                                                    | 183.88  | 1.765 | 1.546 | *#  |
| 1378165_at   | Twist1        | Twist homolog 1 (Drosophila)                                       | 137.80  | 1.528 | 1.238 | #   |
| 1375221_at   | Txndc13       | Thioredoxin domain containing 13                                   | 1368.77 | 1.538 | 1.039 | #†  |
| 1379910_at   | Uap1          | UDP-N-acetylglucosamine pyrophosphorylase 1                        | 248.14  | 2.104 | 1.819 | *#  |
| 1383945_at   | Uck2          | Uridine-cytidine kinase 2                                          | 305.54  | 1.511 | 1.373 | *#  |
| 1369235_at   | Unc5b         | Unc-5 homolog B (C. elegans)                                       | 625.94  | 1.552 | 1.610 | --- |
| 1393799_at   | Unc5b         | Unc-5 homolog B (C. elegans)                                       | 835.71  | 1.522 | 1.531 | *#  |
| 1371861_at   | Unknown       | Unknown                                                            | 387.88  | 1.310 | 1.588 | *#  |
| 1371969_at   | Unknown       | Unknown                                                            | 851.03  | 2.368 | 1.370 | *#† |
| 1372095_at   | Unknown       | Unknown                                                            | 189.58  | 0.587 | 0.665 | *#  |
| 1372347_at   | Unknown       | Unknown                                                            | 529.83  | 1.624 | 1.690 | *#  |
| 1372583_at   | Unknown       | Unknown                                                            | 95.98   | 2.646 | 1.638 | *#† |
| 1372750_at   | Unknown       | Unknown                                                            | 139.11  | 3.966 | 1.759 | *#† |
| 1372761_at   | Unknown       | Unknown                                                            | 81.54   | 0.608 | 0.900 | #†  |
| 1373092_at   | Unknown       | Unknown                                                            | 1494.77 | 0.650 | 0.743 | *#  |
| 1373178_at   | Unknown       | Unknown                                                            | 390.25  | 0.492 | 0.688 | #   |
| 1373487_at   | Unknown       | Unknown                                                            | 744.36  | 0.656 | 0.791 | #   |
| 1373558_at   | Unknown       | Unknown                                                            | 60.51   | 1.617 | 1.388 | --- |
| 1373624_at   | Unknown       | Unknown                                                            | 398.38  | 1.865 | 1.364 | *#† |
| 1373628_at   | Unknown       | Unknown                                                            | 121.00  | 4.960 | 2.000 | *#† |
| 1373651_at   | Unknown       | Unknown                                                            | 115.16  | 1.634 | 1.201 | *#† |
| 1373699_at   | Unknown       | Unknown                                                            | 468.79  | 0.149 | 0.507 | *#† |
| 1374172_at   | Unknown       | Unknown                                                            | 103.81  | 2.908 | 1.579 | *#† |
| 1374298_at   | Unknown       | Unknown                                                            | 74.72   | 0.648 | 0.776 | #   |
| 1374325_at   | Unknown       | Unknown                                                            | 389.22  | 1.563 | 1.400 | *#  |
| 1374410_at   | Unknown       | Unknown                                                            | 63.34   | 1.536 | 1.261 | *#  |
| 1374529_at   | Unknown       | Unknown                                                            | 2639.64 | 2.030 | 1.462 | *#† |
| 1374749_at   | Unknown       | Unknown                                                            | 183.25  | 1.503 | 1.414 | *#  |
| 1374934_at   | Unknown       | Unknown                                                            | 220.35  | 0.395 | 0.625 | *#† |

|              |         |         |         |       |       |     |
|--------------|---------|---------|---------|-------|-------|-----|
| 1375223_at   | Unknown | Unknown | 166.71  | 0.611 | 0.532 | *#  |
| 1376071_at   | Unknown | Unknown | 510.71  | 1.565 | 1.318 | *#  |
| 1376128_at   | Unknown | Unknown | 369.20  | 0.669 | 0.522 | *#† |
| 1376208_at   | Unknown | Unknown | 78.95   | 0.654 | 0.697 | *#  |
| 1376282_at   | Unknown | Unknown | 412.92  | 1.670 | 1.226 | #†  |
| 1376513_a_at | Unknown | Unknown | 282.36  | 1.687 | 1.525 | *#  |
| 1376574_at   | Unknown | Unknown | 530.84  | 0.626 | 1.026 | #†  |
| 1376624_at   | Unknown | Unknown | 186.80  | 0.542 | 0.953 | #†  |
| 1376734_at   | Unknown | Unknown | 238.81  | 2.749 | 1.200 | #†  |
| 1376891_at   | Unknown | Unknown | 376.99  | 0.649 | 0.862 | #†  |
| 1377240_at   | Unknown | Unknown | 92.38   | 2.044 | 1.897 | *#  |
| 1377705_at   | Unknown | Unknown | 1438.05 | 2.139 | 1.830 | *#  |
| 1377706_x_at | Unknown | Unknown | 1254.27 | 2.364 | 2.012 | *#  |
| 1377789_at   | Unknown | Unknown | 50.02   | 1.666 | 1.351 | #   |
| 1377994_at   | Unknown | Unknown | 50.81   | 2.634 | 1.713 | *#† |
| 1378093_at   | Unknown | Unknown | 107.24  | 1.508 | 1.055 | #†  |
| 1378171_at   | Unknown | Unknown | 335.48  | 1.719 | 1.120 | #†  |
| 1378413_at   | Unknown | Unknown | 521.24  | 0.616 | 0.638 | *#  |
| 1378467_at   | Unknown | Unknown | 66.62   | 1.570 | 1.363 | #   |
| 1378556_at   | Unknown | Unknown | 398.24  | 2.265 | 1.817 | *#† |
| 1379252_at   | Unknown | Unknown | 137.32  | 2.436 | 1.382 | *#† |
| 1379517_at   | Unknown | Unknown | 161.45  | 0.696 | 0.609 | *#  |
| 1379598_at   | Unknown | Unknown | 200.01  | 2.319 | 1.826 | *#  |
| 1379785_at   | Unknown | Unknown | 221.25  | 1.619 | 1.406 | *#  |
| 1379799_at   | Unknown | Unknown | 136.62  | 2.298 | 1.628 | *#  |
| 1380318_at   | Unknown | Unknown | 294.00  | 1.880 | 1.041 | #†  |
| 1380494_at   | Unknown | Unknown | 324.69  | 0.606 | 0.542 | *#  |
| 1380544_at   | Unknown | Unknown | 220.60  | 1.739 | 1.402 | *#  |
| 1380626_at   | Unknown | Unknown | 72.32   | 1.466 | 1.541 | --- |
| 1380831_at   | Unknown | Unknown | 64.40   | 1.537 | 1.221 | --- |
| 1382054_at   | Unknown | Unknown | 79.49   | 2.197 | 1.400 | #   |
| 1382108_at   | Unknown | Unknown | 167.26  | 0.432 | 0.620 | #   |
| 1382375_at   | Unknown | Unknown | 202.80  | 0.665 | 0.861 | *#† |
| 1382914_at   | Unknown | Unknown | 169.32  | 1.814 | 1.801 | *#  |
| 1382950_at   | Unknown | Unknown | 197.64  | 0.552 | 0.754 | *#† |
| 1382995_at   | Unknown | Unknown | 264.28  | 1.991 | 1.184 | #†  |
| 1383169_at   | Unknown | Unknown | 665.87  | 0.392 | 0.594 | *#† |
| 1383353_at   | Unknown | Unknown | 246.50  | 1.851 | 1.449 | *#  |
| 1383486_at   | Unknown | Unknown | 110.87  | 5.750 | 2.947 | *#† |
| 1383939_at   | Unknown | Unknown | 460.62  | 1.518 | 1.361 | *#  |
| 1384051_at   | Unknown | Unknown | 143.67  | 3.750 | 1.813 | *#† |
| 1384188_at   | Unknown | Unknown | 143.63  | 0.691 | 0.651 | *#  |
| 1384228_at   | Unknown | Unknown | 166.22  | 1.535 | 1.498 | *#  |
| 1384286_at   | Unknown | Unknown | 116.41  | 1.574 | 1.085 | #†  |
| 1384709_at   | Unknown | Unknown | 70.42   | 2.456 | 1.163 | #†  |
| 1384841_at   | Unknown | Unknown | 213.40  | 0.401 | 0.725 | *#† |
| 1385053_at   | Unknown | Unknown | 98.21   | 0.832 | 0.583 | *†  |
| 1385128_at   | Unknown | Unknown | 83.87   | 0.480 | 0.793 | #†  |
| 1385132_at   | Unknown | Unknown | 49.77   | 2.324 | 2.605 | *#  |
| 1385181_at   | Unknown | Unknown | 46.22   | 1.582 | 1.313 | --- |
| 1386186_s_at | Unknown | Unknown | 110.49  | 1.541 | 1.116 | #†  |
| 1388742_at   | Unknown | Unknown | 458.25  | 0.487 | 0.673 | *#† |

|              |         |                                                 |         |       |       |     |
|--------------|---------|-------------------------------------------------|---------|-------|-------|-----|
| 1388872_at   | Unknown | Unknown                                         | 946.13  | 1.273 | 1.546 | *#† |
| 1388880_at   | Unknown | Unknown                                         | 537.65  | 0.602 | 0.740 | *#  |
| 1388986_at   | Unknown | Unknown                                         | 507.54  | 1.516 | 1.326 | *#  |
| 1389039_at   | Unknown | Unknown                                         | 253.41  | 1.779 | 1.251 | #†  |
| 1389186_at   | Unknown | Unknown                                         | 443.25  | 0.621 | 0.963 | #†  |
| 1389284_at   | Unknown | Unknown                                         | 262.04  | 0.592 | 0.930 | #†  |
| 1389394_at   | Unknown | Unknown                                         | 1017.80 | 1.681 | 1.411 | *#  |
| 1389500_at   | Unknown | Unknown                                         | 404.49  | 0.421 | 0.914 | #†  |
| 1389586_at   | Unknown | Unknown                                         | 335.56  | 1.884 | 1.198 | *#† |
| 1390364_at   | Unknown | Unknown                                         | 86.04   | 1.807 | 1.372 | *#  |
| 1390436_at   | Unknown | Unknown                                         | 763.06  | 0.583 | 0.707 | *#  |
| 1390659_at   | Unknown | Unknown                                         | 355.52  | 1.771 | 1.564 | *#  |
| 1390885_at   | Unknown | Unknown                                         | 271.63  | 1.538 | 1.191 | *#† |
| 1391071_at   | Unknown | Unknown                                         | 36.99   | 1.803 | 1.119 | #†  |
| 1391418_at   | Unknown | Unknown                                         | 112.29  | 1.667 | 1.228 | #†  |
| 1391428_at   | Unknown | Unknown                                         | 123.39  | 1.666 | 1.066 | #†  |
| 1391481_at   | Unknown | Unknown                                         | 124.94  | 1.309 | 1.586 | *   |
| 1391812_at   | Unknown | Unknown                                         | 195.72  | 0.345 | 0.807 | #†  |
| 1392627_x_at | Unknown | Unknown                                         | 401.84  | 1.503 | 1.428 | *#  |
| 1392863_at   | Unknown | Unknown                                         | 67.88   | 0.645 | 0.706 | *#  |
| 1393119_at   | Unknown | Unknown                                         | 254.52  | 1.620 | 1.754 | *#  |
| 1393492_at   | Unknown | Unknown                                         | 72.65   | 1.545 | 1.240 | #   |
| 1393559_at   | Unknown | Unknown                                         | 137.04  | 1.519 | 0.699 | †   |
| 1393653_at   | Unknown | Unknown                                         | 192.33  | 2.120 | 1.241 | *#† |
| 1393728_at   | Unknown | Unknown                                         | 88.73   | 1.535 | 1.487 | --- |
| 1394109_at   | Unknown | Unknown                                         | 841.50  | 2.689 | 1.771 | *#  |
| 1395362_at   | Unknown | Unknown                                         | 384.04  | 1.533 | 1.607 | *#  |
| 1395442_at   | Unknown | Unknown                                         | 58.15   | 2.026 | 1.429 | *#† |
| 1395557_at   | Unknown | Unknown                                         | 173.22  | 1.720 | 1.447 | *#  |
| 1397540_at   | Unknown | Unknown                                         | 306.77  | 0.641 | 0.658 | *#  |
| 1397808_at   | Unknown | Unknown                                         | 850.98  | 0.434 | 0.754 | #†  |
| 1397851_at   | Unknown | Unknown                                         | 186.84  | 1.304 | 1.531 | --- |
| 1397897_x_at | Unknown | Unknown                                         | 94.33   | 1.566 | 1.252 | *#† |
| 1398348_at   | Unknown | Unknown                                         | 618.84  | 1.851 | 1.953 | --- |
| 1373510_at   | Vamp1   | Vesicle-associated membrane protein 1           | 173.46  | 0.600 | 0.634 | *#  |
| 1368474_at   | Vcam1   | Vascular cell adhesion molecule 1               | 1165.17 | 0.330 | 0.626 | *#† |
| 1388142_at   | Vcan    | Versican                                        | 660.54  | 1.343 | 1.513 | --- |
| 1372905_at   | Vcl     | Vinculin                                        | 1928.79 | 1.840 | 1.431 | --- |
| 1368463_at   | Vegfc   | Vascular endothelial growth factor C            | 240.90  | 1.942 | 1.244 | *#† |
| 1387873_at   | Wfdc1   | WAP four-disulfide core domain 1                | 185.54  | 1.765 | 1.956 | *#  |
| 1370221_at   | Wisp1   | WNT1 inducible signaling pathway protein 1      | 110.34  | 2.242 | 1.413 | #†  |
| 1369484_at   | Wisp2   | WNT1 inducible signaling pathway protein 2      | 678.10  | 2.375 | 1.480 | *#† |
| 1392670_at   | Wwc2    | WW and C2 domain containing 2                   | 245.54  | 1.750 | 1.521 | *#  |
| 1395525_at   | Wwc2    | WW and C2 domain containing 2                   | 305.76  | 1.551 | 1.305 | #   |
| 1369973_at   | Xdh     | Xanthine dehydrogenase                          | 458.12  | 0.540 | 0.690 | *#† |
| 1375846_at   | Xpr1    | Xenotropic and polytropic retrovirus receptor 1 | 569.88  | 1.504 | 1.607 | *#  |



## Supplemental Table S7 Changes in transcript expression induced by PE at 0.5 and 1 h

RNA expression analysis was performed using Affymetrix rat exon 1.0 ST microarrays and GeneSpring 12.0, identifying transcripts that were significantly changed by PE at 0.5 or 1 h. Data are provided for PE and ET-1 for the same transcripts for comparison. The raw data for controls are given and results at each time are the mean fold change relative to the controls (n=3). K-means clustering was performed to identify upregulated (U0-U2) and downregulated (D0-D2) groups. Statistical analysis was performed by one-way ANOVA with SNK post-test using a Benjamini and Hochberg false discovery rate correction (FDR<0.05) \* 0.5 h vs control; # 1 h vs control; † 0.5 vs 1 h.

| Transcript cluster ID | Gene Symbol | Gene Title                                                                        | Raw data (Control) | ET-1, 0.5 h | ET-1, 1 h | PE, 0.5 h | PE, 1 h | Statistical significance (PE) | Cluster |
|-----------------------|-------------|-----------------------------------------------------------------------------------|--------------------|-------------|-----------|-----------|---------|-------------------------------|---------|
| 7091079               | Adamts1     | ADAM metalloproteinase with thrombospondin type 1 motif, 1                        | 757                | 1.981       | 2.291     | 1.459     | 1.520   | *#                            | U1      |
| 7370009               | Ankrd57     | Ankyrin repeat domain 57                                                          | 141                | 1.456       | 1.643     | 1.683     | 1.616   | *#                            | U1      |
| 7259100               | Apold1      | Apolipoprotein L domain containing 1                                              | 487                | 1.681       | 1.843     | 1.527     | 1.432   | *#                            | U1      |
| 7328919               | Arc         | Activity-regulated cytoskeleton-associated protein                                | 66                 | 1.887       | 6.367     | 2.711     | 2.649   | *#                            | U1      |
| 7123848               | Areg        | Amphiregulin                                                                      | 163                | 1.862       | 2.880     | 1.414     | 1.900   | *#†                           | U2      |
| 7142915               | Arhgef3     | Rho guanine nucleotide exchange factor (GEF) 3                                    | 199                | 1.054       | 2.763     | 1.220     | 2.068   | *#†                           | U2      |
| 7160453               | Arl5b       | ADP-ribosylation factor-like 5B                                                   | 445                | 1.525       | 1.820     | 2.384     | 2.732   | *#†                           | U1      |
| 7224825               | Aradc3      | Arrestin domain containing 3                                                      | 1760               | 1.150       | 0.694     | 2.787     | 2.214   | *#†                           | U1      |
| 7135004               | AS to Spry2 | Antisense to Sprouty 2                                                            | 214                | 1.416       | 1.601     | 1.357     | 1.683   | *#                            | U2      |
| 7115455               | Atf3        | Activating transcription factor 3                                                 | 480                | 2.141       | 7.189     | 3.286     | 3.487   | *#                            | U1      |
| 7249102               | Bdnf        | Brain derived neurotrophic factor                                                 | 161                | 1.009       | 1.311     | 1.347     | 1.530   | *#†                           | U2      |
| 7257144               | Bhlhe40     | Basic helix-loop-helix family, member e40                                         | 2190               | 1.117       | 1.107     | 1.770     | 1.718   | *#                            | U1      |
| 7111272               | Btg2        | BTG family, member 2                                                              | 421                | 5.329       | 5.287     | 5.059     | 3.802   | *#†                           | U1      |
| 7086934               | Cbr1        | Carbonyl reductase 1                                                              | 1107               | 0.812       | 0.935     | 1.738     | 2.366   | *#†                           | U2      |
| 7086951               | Cbr1        | Carbonyl reductase 1                                                              | 811                | 0.914       | 0.977     | 1.952     | 2.872   | *#†                           | U2      |
| 7086964               | Cbr3        | Carbonyl reductase 3                                                              | 109                | 0.975       | 1.017     | 1.725     | 2.191   | *#†                           | U2      |
| 7070340               | Ccl7        | Chemokine (C-C motif) ligand 7                                                    | 2024               | 1.385       | 1.548     | 1.516     | 1.068   | *†                            | U0      |
| 7209338               | Ccn1        | Cyclin L1                                                                         | 597                | 2.904       | 1.917     | 1.683     | 1.455   | *#                            | U0      |
| 7350504               | Ccr4        | Chemokine (C-C motif) receptor 4                                                  | 43                 | 1.320       | 1.230     | 1.555     | 1.174   | *†                            | U0      |
| 7193902               | Ccrn4l      | CCR4 carbon catabolite repression 4-like (S. cerevisiae)                          | 186                | 1.812       | 6.278     | 1.271     | 2.209   | *#†                           | U2      |
| 7219866               | Cd24        | CD24 molecule                                                                     | 739                | 0.896       | 0.943     | 1.404     | 1.688   | *#†                           | U2      |
| 7062006               | Ch25h       | Cholesterol 25-hydroxylase                                                        | 420                | 3.704       | 5.685     | 3.463     | 2.519   | *#†                           | U0      |
| 7025269               | Cited2      | Cbp/p300-interacting transactivator, with Glu/Asp-rich carboxy-terminal domain, 2 | 1277               | 1.934       | 3.206     | 1.493     | 1.969   | *#†                           | U2      |
| 7039008               | Clcf1       | Cardiotrophin-like cytokine factor 1                                              | 184                | 1.082       | 1.347     | 1.603     | 1.648   | *#                            | U1      |
| 7153439               | Cln8        | Claudin 8                                                                         | 288                | 0.961       | 1.007     | 1.380     | 1.502   | *#†                           | U1      |
| 7354636               | Coq10b      | Coenzyme Q10 homolog B (S. cerevisiae)                                            | 580                | 1.421       | 2.253     | 2.049     | 2.393   | *#                            | U1      |
| 7158671               | Crem        | cAMP responsive element modulator                                                 | 239                | 1.207       | 1.301     | 1.509     | 1.535   | *#                            | U1      |
| 7071906               | Csf3        | Colony stimulating factor 3 (granulocyte)                                         | 274                | 1.416       | 0.894     | 1.597     | 1.222   | *#†                           | U0      |
| 7350918               | Csrp1       | Cysteine-serine-rich nuclear protein 1                                            | 257                | 2.066       | 4.191     | 2.613     | 2.400   | *#†                           | U1      |
| 7044959               | Ctgf        | cConnective tissue growth factor                                                  | 1305               | 3.006       | 2.566     | 1.743     | 1.819   | *#                            | U1      |
| 7123885               | Cxcl1       | Chemokine (C-X-C motif) ligand 1 (melanoma growth stimulating activity, alpha)    | 2563               | 1.585       | 1.257     | 2.044     | 1.085   | *†                            | U0      |
| 7123883               | Cxcl2       | Chemokine (C-X-C motif) ligand 2                                                  | 762                | 1.164       | 1.318     | 1.471     | 1.651   | *#                            | U1      |
| 7357534               | Cxcr7       | Chemokine (C-X-C motif) receptor 7                                                | 1370               | 1.291       | 1.220     | 1.567     | 1.557   | *#                            | U1      |
| 7302739               | Cyp1b1      | Cytochrome P450, family 1, subfamily B, polypeptide 1                             | 948                | 1.362       | 1.080     | 1.450     | 1.510   | *#                            | U1      |
| 7215359               | Cyr61       | Cysteine-rich, angiogenic inducer, 61                                             | 1616               | 5.414       | 3.769     | 2.591     | 1.826   | *#†                           | U0      |
| 7107035               | Dnm3        | Dynamin 3                                                                         | 379                | 0.481       | 0.566     | 0.530     | 0.743   | *#†                           | D2      |

|         |                   |                                                                  |      |        |        |        |       |     |    |
|---------|-------------------|------------------------------------------------------------------|------|--------|--------|--------|-------|-----|----|
| 7312560 | Dos               | Downstream of Stk11                                              | 92   | 1.078  | 1.059  | 1.385  | 1.691 | *#† | U2 |
| 7066011 | Dusp1             | Dual specificity phosphatase 1                                   | 1462 | 3.605  | 2.695  | 2.469  | 1.607 | *#† | U0 |
| 7108644 | Dusp10            | Dual specificity phosphatase 10                                  | 281  | 1.063  | 3.725  | 1.131  | 1.675 | *#† | U2 |
| 7152119 | Dusp4             | Dual specificity phosphatase 4                                   | 306  | 1.299  | 1.849  | 1.504  | 2.019 | *#† | U2 |
| 7043230 | Dusp5             | Dual specificity phosphatase 5                                   | 377  | 1.996  | 4.501  | 2.310  | 2.540 | *#  | U1 |
| 7314286 | Dusp6             | Dual specificity phosphatase 6                                   | 1813 | 1.953  | 2.184  | 1.368  | 1.737 | *#† | U2 |
| 7163221 | Edn1              | Endothelin 1                                                     | 121  | 2.475  | 2.745  | 2.191  | 1.351 | *#† | U0 |
| 7169197 | Egr1              | Early growth response 1                                          | 1804 | 6.774  | 3.158  | 3.421  | 2.388 | *#† | U0 |
| 7222466 | Egr2              | Early growth response 2                                          | 159  | 5.112  | 4.856  | 5.306  | 3.579 | *#† | U0 |
| 7133143 | Egr3              | Early growth response 3                                          | 142  | 4.254  | 16.346 | 6.353  | 6.743 | *#  | U1 |
| 7188693 | Enc1              | Ectodermal-neural cortex 1                                       | 380  | 1.109  | 1.299  | 1.508  | 1.644 | *#† | U1 |
| 7123853 | Ereg              | Epiregulin                                                       | 139  | 2.137  | 4.518  | 2.968  | 3.572 | *#† | U1 |
| 7281719 | Errf1             | ERBB receptor feedback inhibitor 1                               | 1669 | 3.142  | 3.706  | 2.673  | 2.988 | *#† | U1 |
| 7297136 | Fam110c           | Family with sequence similarity 110, member C                    | 111  | 1.979  | 3.760  | 1.875  | 2.537 | *#† | U2 |
| 7212002 | Fam46c            | Family with sequence similarity 46, member C                     | 163  | 1.235  | 1.126  | 1.432  | 1.781 | *#† | U2 |
| 7345585 | Fdx1              | Ferredoxin 1                                                     | 494  | 1.553  | 3.480  | 2.676  | 3.197 | *#† | U1 |
| 7300295 | Fos               | FBJ osteosarcoma oncogene                                        | 178  | 15.214 | 2.952  | 7.867  | 2.566 | *#† | U0 |
| 7048605 | Fosb              | FBJ osteosarcoma oncogene B                                      | 94   | 25.477 | 23.168 | 3.508  | 2.739 | *#† | U1 |
| 7039170 | Fosl1             | Fos-like antigen 1                                               | 184  | 1.456  | 5.980  | 2.073  | 3.088 | *#† | U2 |
| 7162363 | Gadd45g           | Growth arrest and DNA-damage-inducible, gamma                    | 748  | 3.560  | 2.381  | 1.741  | 1.893 | *#  | U1 |
| 7338247 | Gclc              | Glutamate-cysteine ligase, catalytic subunit                     | 798  | 1.412  | 1.668  | 1.451  | 2.034 | *#† | U2 |
| 7144218 | Gdf15             | Growth differentiation factor 15                                 | 291  | 1.583  | 1.143  | 1.804  | 1.158 | *#† | U0 |
| 7067195 | Gfpt2             | Glutamine-fructose-6-phosphate transaminase 2                    | 2413 | 1.025  | 1.186  | 1.424  | 1.820 | *#† | U2 |
| 7280238 | Gpr3              | G protein-coupled receptor 3                                     | 128  | 1.085  | 1.942  | 1.359  | 1.790 | *#† | U2 |
| 7047218 | Has1              | Hyaluronan synthase 1                                            | 71   | 2.021  | 2.452  | 3.319  | 3.324 | *#  | U1 |
| 7327675 | Has2              | Hyaluronan synthase 2                                            | 552  | 3.069  | 8.143  | 3.862  | 4.896 | *#† | U1 |
| 7055290 | Hbb               | Hemoglobin subunit beta-1                                        | 4634 | 0.912  | 0.600  | 0.646  | 0.714 | *#  | D1 |
| 7174562 | Hbegf             | Heparin-binding EGF-like growth factor                           | 304  | 1.503  | 3.592  | 1.285  | 1.610 | *#† | U2 |
| 7266497 | Hk2               | Hexokinase 2                                                     | 305  | 1.034  | 1.712  | 1.098  | 1.551 | *#† | U2 |
| 7179800 | Ier2              | Immediate early response 2                                       | 435  | 5.475  | 2.463  | 3.344  | 1.871 | *#† | U0 |
| 7220503 | Ier3              | Immediate early response 3                                       | 1963 | 1.766  | 1.347  | 2.924  | 1.871 | *#† | U0 |
| 7104832 | Il10              | Interleukin 10                                                   | 43   | 4.331  | 1.479  | 3.948  | 1.642 | *#† | U0 |
| 7028549 | Il11              | Interleukin 11                                                   | 222  | 1.769  | 1.920  | 2.061  | 2.115 | *#  | U1 |
| 7036726 | Il4ra             | Interleukin 4 receptor, alpha                                    | 645  | 1.173  | 0.937  | 1.319  | 1.537 | *#† | U2 |
| 7260080 | Il6               | Interleukin 6                                                    | 229  | 6.140  | 4.611  | 12.595 | 5.897 | *#† | U0 |
| 7165193 | Inhba             | Inhibin beta-A                                                   | 213  | 1.950  | 6.251  | 1.713  | 2.519 | *#† | U2 |
| 7147829 | Intron to Col14a1 | Intron to Col14a1                                                | 180  | 1.198  | 1.332  | 1.564  | 1.314 | *#  | U0 |
| 7135534 | Intron to Mbn12   | Intron to Mbn12                                                  | 186  | 1.352  | 1.315  | 1.303  | 1.531 | *#  | U2 |
| 7091841 | Intron to Runx1   | Intron to Runx1                                                  | 68   | 1.216  | 1.593  | 1.154  | 1.779 | *#† | U2 |
| 7147838 | Irs2              | Insulin receptor substrate 2                                     | 209  | 1.610  | 1.707  | 2.157  | 2.436 | *#† | U1 |
| 7049112 | Itpkc             | Inositol 1,4,5-trisphosphate 3-kinase C                          | 132  | 1.180  | 1.291  | 2.151  | 2.412 | *#† | U1 |
| 7041047 | Jak2              | Janus kinase 2                                                   | 379  | 2.151  | 0.673  | 0.658  | 0.705 | *#  | D1 |
| 7179739 | Junb              | Jun B proto-oncogene                                             | 392  | 3.287  | 1.443  | 2.713  | 1.781 | *#† | U0 |
| 7326749 | Klf10             | Kruppel like factor 10                                           | 227  | 0.783  | 1.088  | 1.296  | 1.518 | *#† | U2 |
| 7149521 | Klf2              | Kruppel-like factor 2 (lung)                                     | 178  | 2.282  | 1.931  | 1.591  | 1.199 | *#† | U0 |
| 7286480 | Klf4              | Kruppel-like factor 4 (gut)                                      | 234  | 2.580  | 3.458  | 2.153  | 2.242 | *#  | U1 |
| 7120521 | Lif               | Leukemia inhibitory factor (cholinergic differentiation factor)  | 204  | 4.823  | 4.712  | 7.569  | 5.317 | *#† | U1 |
| 7257290 | Lmcd1             | LIM and cysteine-rich domains 1                                  | 523  | 1.751  | 2.929  | 1.181  | 1.714 | *#† | U2 |
| 7335998 | LOC363060         | Similar to RIKEN cDNA 1600029D21                                 | 120  | 1.053  | 1.704  | 1.153  | 2.123 | *#† | U2 |
| 7318753 | Maff              | v-maf musculoaponeurotic fibrosarcoma oncogene homolog F (avian) | 147  | 1.553  | 1.957  | 1.360  | 1.510 | *#  | U1 |

|         |                  |                                                                                                |      |       |        |        |        |     |    |
|---------|------------------|------------------------------------------------------------------------------------------------|------|-------|--------|--------|--------|-----|----|
| 7266023 | Mat2a            | Methionine adenosyltransferase II, alpha                                                       | 2888 | 1.468 | 1.620  | 1.547  | 1.678  | *#  | U1 |
| 7173133 | Mir1-2/Mir133a-1 | MicroRNA Mir1-2/Mir133a-1                                                                      | 791  | 1.184 | 0.492  | 0.927  | 0.498  | #†  | D0 |
| 7335235 | Mir125b-1        | MicroRNA Mir125b-1                                                                             | 580  | 1.268 | 2.624  | 1.184  | 1.640  | #†  | U2 |
| 7105681 | Mir181b-1        | MicroRNA mir-181b-1                                                                            | 112  | 0.849 | 0.723  | 0.645  | 1.418  | *†  | D2 |
| 7384266 | Mir351/542       | MicroRNA Mir351/542                                                                            | 232  | 1.447 | 1.005  | 1.690  | 1.115  | *†  | U0 |
| 7211447 | Mllt1            | myeloid/lymphoid or mixed-lineage leukemia (trithorax homolog, Drosophila); translocated to, 1 | 335  | 1.675 | 1.681  | 1.402  | 1.552  | *#  | U1 |
| 7317471 | Myc              | Myelocytomatosis oncogene                                                                      | 212  | 1.830 | 2.602  | 1.323  | 1.554  | *#† | U2 |
| 7326308 | Nab2             | Ngfi-A binding protein 2                                                                       | 580  | 1.025 | 1.012  | 1.530  | 1.403  | *#† | U1 |
| 7297245 | Nampt            | Nicotinamide phosphoribosyltransferase                                                         | 352  | 0.848 | 1.570  | 1.242  | 1.710  | *#† | U2 |
| 7155813 | Nfil3            | Nuclear factor, interleukin 3 regulated                                                        | 107  | 1.584 | 2.735  | 1.968  | 2.369  | *#  | U1 |
| 7320920 | Nr4a1            | Nuclear receptor subfamily 4, group A, member 1                                                | 163  | 8.505 | 18.929 | 20.769 | 20.607 | *#  | U1 |
| 7239111 | Nr4a2            | Nuclear receptor subfamily 4, group A, member 2                                                | 106  | 2.381 | 8.923  | 13.409 | 14.626 | *#  | U1 |
| 7274931 | Nr4a3            | Nuclear receptor subfamily 4, group A, member 3                                                | 121  | 2.813 | 7.361  | 10.615 | 11.601 | *#  | U1 |
| 7270053 | Olr1             | Oxidized low density lipoprotein (lectin-like) receptor 1                                      | 1893 | 1.290 | 1.585  | 1.639  | 1.998  | *#† | U2 |
| 7034940 | Olr148           | Olfactory receptor 148                                                                         | 53   | 1.099 | 1.202  | 1.587  | 1.206  | *†  | U0 |
| 7241464 | Olr704           | olfactory receptor 704                                                                         | 40   | 1.049 | 1.402  | 1.530  | 1.191  | *#† | U0 |
| 7296159 | Osr1             | Odd-skipped related 1 (Drosophila)                                                             | 259  | 0.857 | 0.964  | 0.952  | 0.592  | #†  | D0 |
| 7235566 | Pard6b           | Par-6 (partitioning defective 6) homolog beta (C. elegans)                                     | 98   | 1.230 | 3.622  | 1.104  | 1.838  | #†  | U2 |
| 7277759 | Pde4b            | Phosphodiesterase 4b                                                                           | 474  | 0.910 | 1.110  | 1.410  | 1.516  | *#† | U1 |
| 7189455 | Pde4d            | Phosphodiesterase 4d                                                                           | 385  | 1.012 | 1.048  | 1.250  | 1.500  | *#† | U2 |
| 7204067 | Pelo             | Pelota homolog (Drosophila)                                                                    | 1185 | 1.079 | 1.419  | 1.241  | 1.520  | *#† | U2 |
| 7283288 | Penk             | Proenkephalin                                                                                  | 2246 | 1.258 | 1.101  | 1.360  | 1.524  | *#† | U1 |
| 7068987 | Per1             | Period homolog 1 (Drosophila)                                                                  | 131  | 1.368 | 1.467  | 1.631  | 2.210  | *#† | U2 |
| 7314872 | Phlda1           | Pleckstrin homology-like domain, family A, member 1                                            | 520  | 3.517 | 4.155  | 3.994  | 3.388  | *#† | U1 |
| 7120384 | Pik3ip1          | Phosphoinositide-3-kinase interacting protein 1                                                | 485  | 0.696 | 0.544  | 0.803  | 0.585  | *#† | D0 |
| 7217331 | Pim1             | Pim-1 oncogene                                                                                 | 1687 | 1.610 | 1.703  | 1.772  | 1.208  | *#† | U0 |
| 7189518 | Plk2             | Polo-like kinase 2 (Drosophila)                                                                | 1947 | 2.445 | 3.030  | 1.707  | 1.559  | *#  | U1 |
| 7290290 | Plk3             | Polo-like kinase 3 (Drosophila)                                                                | 179  | 1.449 | 1.508  | 1.678  | 1.308  | *#† | U0 |
| 7339147 | Plscr1           | Phospholipid scramblase 1                                                                      | 169  | 0.997 | 1.408  | 1.464  | 1.833  | *   | U2 |
| 7237508 | Ptges            | Prostaglandin E synthase                                                                       | 427  | 0.979 | 0.902  | 1.276  | 1.862  | *#† | U2 |
| 7106132 | Ptgs2            | Prostaglandin-endoperoxide synthase 2                                                          | 258  | 7.005 | 7.981  | 5.272  | 3.312  | *#† | U0 |
| 7354851 | Ptp4a1           | Protein tyrosine phosphatase 4a1                                                               | 544  | 1.346 | 1.779  | 1.431  | 1.575  | *#  | U1 |
| 7078129 | Rasd1            | RAS, dexamethasone-induced 1                                                                   | 419  | 2.249 | 0.875  | 2.179  | 1.236  | *#† | U0 |
| 7124933 | Rasl11b          | RAS-like family 11 member B                                                                    | 855  | 2.304 | 1.841  | 1.643  | 1.362  | *#† | U0 |
| 7128932 | Rel              | v-rel reticuloendotheliosis viral oncogene homolog gene                                        | 203  | 1.532 | 1.951  | 1.581  | 2.022  | *#† | U2 |
| 7030172 | RGD1563982       | Similar to F-box only protein 27                                                               | 192  | 1.060 | 1.071  | 1.431  | 1.592  | *#† | U1 |
| 7294961 | RGD1565310       | Similar to RIKEN cDNA 1110018J12                                                               | 83   | 0.771 | 0.878  | 0.588  | 0.614  | *#  | D1 |
| 7112009 | Rgs2             | Regulator of G-protein signaling 2                                                             | 613  | 3.146 | 5.494  | 5.024  | 4.199  | *#† | U1 |
| 7304448 | Rhob             | Ras homolog gene family, member B                                                              | 799  | 2.595 | 2.593  | 2.209  | 1.786  | *#† | U0 |
| 7284153 | Ripk2            | Receptor-interacting serine-threonine kinase 2                                                 | 397  | 0.936 | 2.663  | 1.105  | 1.535  | #†  | U2 |
| 7331581 | Rnd1             | Rho family GTPase 1                                                                            | 421  | 1.595 | 2.215  | 1.173  | 1.519  | *#† | U2 |
| 7178179 | Rrad             | Ras-related associated with diabetes                                                           | 443  | 0.856 | 0.894  | 0.658  | 0.553  | *#  | D1 |
| 7103916 | Serpib2          | Serine (or cysteine) peptidase inhibitor, clade B, member 2                                    | 284  | 3.388 | 14.086 | 1.826  | 3.231  | *#† | U2 |
| 7101220 | Serpine1         | Serine (or cysteine) peptidase inhibitor, clade E, member 1                                    | 601  | 6.428 | 8.141  | 1.773  | 2.001  | *#  | U1 |
| 7221460 | Sik1             | Salt-inducible kinase 1                                                                        | 415  | 1.889 | 2.039  | 3.478  | 4.112  | *#† | U1 |
| 7237652 | Slc25a25         | Solute carrier family 25 (mitochondrial carrier, phosphate carrier), member 25                 | 148  | 2.662 | 1.748  | 1.561  | 1.257  | *#† | U0 |
| 7269356 | Slc2a3           | Solute carrier family 2 (facilitated glucose transporter), member 3                            | 435  | 0.833 | 1.571  | 2.040  | 2.752  | *#† | U2 |
| 7187663 | Snrpd1 EII2      | Small nuclear ribonucleoprotein D1   elongation factor RNA polymerase II 2                     | 148  | 1.285 | 2.281  | 1.239  | 2.557  | *#† | U2 |

|         |         |                                                       |      |       |       |       |       |     |    |
|---------|---------|-------------------------------------------------------|------|-------|-------|-------|-------|-----|----|
| 7073409 | Sox9    | SRY box-containing gene 9                             | 351  | 1.006 | 0.974 | 1.568 | 1.826 | *#† | U1 |
| 7382102 | Spin4   | Spindlin family, member 4                             | 248  | 0.921 | 1.323 | 1.433 | 1.785 | *#† | U2 |
| 7141508 | Spry2   | Sprouty 2                                             | 795  | 1.720 | 2.261 | 1.523 | 1.221 | *#† | U0 |
| 7233921 | Srxn1   | Sulfiredoxin 1 homolog (S. cerevisiae)                | 119  | 1.802 | 2.171 | 1.553 | 1.812 | *#  | U1 |
| 7152722 | Star    | Steroidogenic acute regulatory protein                | 159  | 1.125 | 1.143 | 1.494 | 1.753 | *#† | U2 |
| 7261795 | Tfpi2   | Tissue factor pathway inhibitor 2                     | 294  | 1.040 | 2.020 | 1.314 | 1.781 | *#† | U2 |
| 7308910 | Tgfb3   | Transforming growth factor beta 3                     | 299  | 1.297 | 2.044 | 1.240 | 1.505 | *#† | U2 |
| 7246265 | Thbd    | Thrombomodulin                                        | 110  | 1.756 | 1.588 | 1.218 | 1.642 | #†  | U2 |
| 7106964 | Tnfsf18 | Tumor necrosis factor (ligand) superfamily, member 18 | 129  | 2.348 | 7.480 | 1.578 | 1.602 | *#  | U1 |
| 7317342 | Trib1   | Tribbles homolog 1 (Drosophila)                       | 183  | 2.805 | 2.680 | 1.427 | 1.726 | *#† | U2 |
| 7297329 | Twist1  | Twist homolog 1 (Drosophila)                          | 215  | 1.259 | 3.797 | 1.477 | 1.707 | *#  | U1 |
| 7197113 | Txnip   | Thioredoxin interacting protein                       | 2271 | 1.149 | 0.671 | 0.599 | 0.571 | *#  | D1 |
| 7113823 | Uap1    | UDP-N-acetylglucosamine pyrophosphorylase 1           | 430  | 1.172 | 3.186 | 1.701 | 3.032 | *#† | U2 |
| 7118521 | Ugdh    | UDP-glucose 6-dehydrogenase                           | 1143 | 1.054 | 1.566 | 1.415 | 1.548 | *#† | U1 |
| 7043686 | Unknown | Unknown                                               | 50   | 1.150 | 1.022 | 1.507 | 1.063 | *†  | U0 |
| 7057552 | Unknown | Unknown                                               | 134  | 0.807 | 0.698 | 0.646 | 0.697 | *#  | D1 |
| 7061626 | Unknown | Unknown                                               | 57   | 0.892 | 1.503 | 1.116 | 1.702 | #†  | U2 |
| 7071496 | Unknown | Unknown                                               | 96   | 0.587 | 0.789 | 0.662 | 0.877 | *†  | D2 |
| 7085388 | Unknown | Unknown                                               | 85   | 1.385 | 0.962 | 1.802 | 1.370 | *#† | U0 |
| 7085832 | Unknown | Unknown                                               | 98   | 0.872 | 1.411 | 2.165 | 1.680 | *#  | U0 |
| 7096304 | Unknown | Unknown                                               | 90   | 0.795 | 0.625 | 0.692 | 0.620 | *#† | D1 |
| 7145048 | Unknown | Unknown                                               | 283  | 0.930 | 0.615 | 0.624 | 0.594 | *#  | D1 |
| 7146009 | Unknown | Unknown                                               | 124  | 1.329 | 1.192 | 1.486 | 1.651 | *#  | U1 |
| 7174327 | Unknown | Unknown                                               | 85   | 1.568 | 1.400 | 1.756 | 1.600 | *#  | U1 |
| 7200422 | Unknown | Unknown                                               | 124  | 2.974 | 2.049 | 1.590 | 1.447 | *#† | U1 |
| 7203844 | Unknown | Unknown                                               | 65   | 1.016 | 1.099 | 1.563 | 1.278 | *   | U0 |
| 7209914 | Unknown | Unknown                                               | 103  | 1.107 | 0.601 | 0.703 | 0.665 | *#  | D1 |
| 7212310 | Unknown | Unknown                                               | 155  | 1.077 | 2.227 | 1.429 | 1.869 | *#† | U2 |
| 7224482 | Unknown | Unknown                                               | 540  | 0.354 | 0.504 | 0.532 | 0.712 | *#† | D2 |
| 7243539 | Unknown | Unknown                                               | 62   | 0.858 | 1.310 | 1.381 | 1.607 | *#  | U2 |
| 7256305 | Unknown | Unknown                                               | 70   | 1.403 | 1.519 | 2.035 | 2.238 | *#  | U1 |
| 7288050 | Unknown | Unknown                                               | 182  | 1.014 | 0.619 | 0.792 | 0.651 | *#† | D1 |
| 7297222 | Unknown | Unknown                                               | 267  | 1.827 | 2.360 | 1.210 | 1.539 | *#† | U2 |
| 7297247 | Unknown | Unknown                                               | 194  | 1.399 | 2.808 | 2.224 | 1.575 | *#† | U0 |
| 7305661 | Unknown | Unknown                                               | 86   | 0.886 | 1.334 | 1.063 | 1.530 | #†  | U2 |
| 7341409 | Unknown | Unknown                                               | 46   | 1.461 | 1.073 | 1.553 | 1.149 | *†  | U0 |
| 7367172 | Unknown | Unknown                                               | 450  | 0.966 | 0.925 | 0.782 | 0.654 | *#† | D1 |
| 7368431 | Unknown | Unknown                                               | 99   | 1.099 | 0.692 | 0.709 | 0.632 | *#  | D1 |
| 7368915 | Unknown | Unknown                                               | 98   | 1.222 | 0.712 | 0.637 | 0.548 | *#  | D1 |
| 7369143 | Unknown | Unknown                                               | 153  | 0.854 | 0.876 | 0.585 | 0.442 | *#  | D1 |
| 7369253 | Unknown | Unknown                                               | 91   | 1.034 | 1.004 | 0.751 | 0.660 | *#  | D1 |
| 7370000 | Unknown | Unknown                                               | 166  | 0.671 | 1.112 | 1.831 | 1.176 | *†  | U0 |
| 7370355 | Unknown | Unknown                                               | 1984 | 0.906 | 1.432 | 1.582 | 1.326 | *   | U0 |
| 7370666 | Unknown | Unknown                                               | 466  | 0.829 | 0.824 | 0.743 | 0.651 | #   | D1 |
| 7370806 | Unknown | Unknown                                               | 360  | 0.785 | 0.788 | 0.571 | 0.734 | *   | D2 |
| 7371629 | Unknown | Unknown                                               | 72   | 0.909 | 0.891 | 0.676 | 0.571 | *#  | D1 |
| 7335234 | Vof16   | Ischemia related factor vof-16                        | 410  | 1.443 | 2.856 | 1.080 | 1.616 | #†  | U2 |
| 7350922 | Xirp1   | Xin actin-binding repeat containing 1                 | 520  | 1.323 | 1.997 | 1.132 | 1.644 | #†  | U2 |
| 7290942 | Zc3h12a | Zinc finger CCCH type containing 12A                  | 264  | 0.980 | 0.981 | 1.805 | 1.467 | *#† | U0 |
| 7096947 | Zfand2a | Zinc finger, AN1-type domain 2A                       | 555  | 1.204 | 1.714 | 1.217 | 1.513 | *#† | U2 |
| 7049312 | Zfp36   | Zinc finger protein 36                                | 302  | 3.606 | 2.516 | 3.204 | 1.845 | *#† | U0 |

## Supplemental Table S8 Changes in transcript expression induced by ET-1 at 0.5 and 1 h

RNA expression analysis was performed using Affymetrix rat exon 1.0 ST microarrays, identifying transcripts that were significantly changed by ET-1 at 0.5 or 1 h. Data are provided for PE and ET-1 for the same transcripts for comparison. The raw data for controls are given and results at each time are the mean fold change relative to the controls (n=3). Statistical analysis for ET-1-responsive transcripts was performed by one-way ANOVA with SNK post-test using a Benjamini and Hochberg false discovery rate correction (FDR<0.05) \* 0.5 h vs control; # 1 h vs control; † 0.5 vs 1 h.

| Transcript cluster ID | Gene Symbol                 | Gene Title                                                                          | Raw data (Control) | ET-1, 0.5 h | ET-1, 1 h | PE, 0.5 h | PE, 1 h | Statistical significance (ET-1) |
|-----------------------|-----------------------------|-------------------------------------------------------------------------------------|--------------------|-------------|-----------|-----------|---------|---------------------------------|
| 7327038               | Abra                        | Actin-binding Rho activating protein                                                | 86                 | 1.249       | 1.775     | 1.033     | 1.295   | #†                              |
| 7091079               | Adamts1                     | ADAM metalloproteinase with thrombospondin type 1 motif, 1                          | 757                | 1.981       | 2.291     | 1.459     | 1.520   | *#†                             |
| 7343686               | Adamts15                    | ADAM metalloproteinase with thrombospondin type 1 motif, 15                         | 318                | 0.822       | 0.590     | 0.839     | 0.726   | *#†                             |
| 7123129               | Agpat9                      | 1-acylglycerol-3-phosphate O-acyltransferase 9                                      | 109                | 0.952       | 2.054     | 0.995     | 1.404   | #†                              |
| 7275485               | Akap2                       | A kinase (PRKA) anchor protein 2                                                    | 829                | 1.395       | 1.783     | 1.224     | 1.356   | *#†                             |
| 7213945               | Alpk1                       | Alpha-kinase 1                                                                      | 130                | 1.014       | 1.608     | 0.940     | 0.996   | #†                              |
| 7322881               | Angptl4                     | Angiopietin-like 4                                                                  | 303                | 0.889       | 0.664     | 0.775     | 0.869   | #†                              |
| 7370009               | Ankrd57                     | Ankyrin repeat domain 57                                                            | 141                | 1.456       | 1.643     | 1.683     | 1.616   | *#                              |
| 7060990               | Anxa1                       | Annexin A1                                                                          | 2440               | 1.322       | 2.344     | 0.993     | 1.031   | #†                              |
| 7160892               | Apbb1ip                     | Amyloid beta (A4) precursor protein-binding, family B, member 1 interacting protein | 81                 | 1.085       | 1.556     | 0.973     | 0.854   | *#†                             |
| 7259100               | Apold1                      | Apolipoprotein L domain containing 1                                                | 487                | 1.681       | 1.843     | 1.527     | 1.432   | *#                              |
| 7328919               | Arc                         | Activity-regulated cytoskeleton-associated protein                                  | 66                 | 1.887       | 6.367     | 2.711     | 2.649   | *#†                             |
| 7123848               | Areg                        | Amphiregulin                                                                        | 163                | 1.862       | 2.880     | 1.414     | 1.900   | *#†                             |
| 7142915               | Arhgef3                     | Rho guanine nucleotide exchange factor (GEF) 3                                      | 199                | 1.054       | 2.763     | 1.220     | 2.068   | #†                              |
| 7353382               | Arid5a                      | AT rich interactive domain 5A (Mrf1 like)                                           | 246                | 1.457       | 1.547     | 1.069     | 1.311   | *#                              |
| 7218259               | Arid5b                      | AT rich interactive domain 5B (Mrf1 like)                                           | 397                | 1.266       | 1.684     | 1.099     | 1.326   | *#†                             |
| 7160453               | Arl5b                       | ADP-ribosylation factor-like 5B                                                     | 445                | 1.525       | 1.820     | 2.384     | 2.732   | *#                              |
| 7115455               | Atf3                        | Activating transcription factor 3                                                   | 480                | 2.141       | 7.189     | 3.286     | 3.487   | *#†                             |
| 7024628               | Atp13a3 LOC678704 LOC292449 | ATPase type 13A3   hypothetical protein LOC678704   similar to hypothetical protein | 347                | 1.017       | 1.616     | 1.055     | 1.173   | #†                              |
| 7105894               | B3galt2                     | UDP-Gal:betaGlcNAc beta 1,3-galactosyltransferase, polypeptide 2                    | 394                | 1.220       | 1.515     | 1.144     | 1.271   | *#†                             |
| 7048723               | Bcl3                        | B-cell CLL/lymphoma 3                                                               | 289                | 0.855       | 0.583     | 1.007     | 0.825   | *#†                             |
| 7301401               | Bdkrb1                      | Bradykinin receptor B1                                                              | 52                 | 1.677       | 1.445     | 1.148     | 1.240   | *#                              |
| 7271485               | Bhlhe41                     | Basic helix-loop-helix family, member e41                                           | 274                | 0.667       | 0.952     | 1.088     | 1.324   | *†                              |
| 7232862               | Bmp2                        | Bone morphogenetic protein 2                                                        | 139                | 1.821       | 2.443     | 1.141     | 1.393   | *#                              |
| 7111272               | Btg2                        | BTG family, member 2                                                                | 421                | 5.329       | 5.287     | 5.059     | 3.802   | *#                              |
| 7159536               | Calml3                      | Calmodulin-like 3                                                                   | 114                | 1.538       | 0.991     | 1.038     | 1.004   | *†                              |
| 7251397               | Cav1                        | Caveolin 1, caveolae protein                                                        | 2474               | 0.979       | 1.551     | 1.007     | 1.073   | #†                              |
| 7070340               | Ccl7                        | Chemokine (C-C motif) ligand 7                                                      | 2024               | 1.385       | 1.548     | 1.516     | 1.068   | *#†                             |
| 7209338               | Ccn1                        | Cyclin L1                                                                           | 597                | 2.904       | 1.917     | 1.683     | 1.455   | *#†                             |
| 7193902               | Ccrn4l                      | CCR4 carbon catabolite repression 4-like ( <i>S. cerevisiae</i> )                   | 186                | 1.812       | 6.278     | 1.271     | 2.209   | *#†                             |
| 7113283               | Cct6a                       | Chaperonin containing Tcp1, subunit 6A (zeta 1)                                     | 678                | 0.736       | 0.551     | 1.182     | 0.883   | #                               |
| 7242411               | Cd44                        | Cd44 molecule                                                                       | 402                | 1.175       | 2.327     | 1.071     | 1.421   | *#†                             |
| 7110888               | Cd55                        | Cd55 molecule                                                                       | 193                | 1.014       | 1.632     | 1.120     | 1.335   | #†                              |
| 7059858               | Cdc42ep2                    | CDC42 effector protein (Rho GTPase binding) 2                                       | 310                | 1.020       | 0.626     | 0.972     | 0.795   | #†                              |
| 7062006               | Ch25h                       | Cholesterol 25-hydroxylase                                                          | 420                | 3.704       | 5.685     | 3.463     | 2.519   | *#                              |
| 7231595               | Chac1                       | ChaC, cation transport regulator homolog 1 ( <i>E. coli</i> )                       | 315                | 1.344       | 2.368     | 1.461     | 1.078   | *#†                             |

|         |                 |                                                                                                 |      |        |        |       |       |     |
|---------|-----------------|-------------------------------------------------------------------------------------------------|------|--------|--------|-------|-------|-----|
| 7025269 | Cited2          | Cbp/p300-interacting transactivator, with Glu/Asp-rich carboxy-terminal domain, 2               | 1277 | 1.934  | 3.206  | 1.493 | 1.969 | *#† |
| 7279127 | Cited4          | Cbp/p300-interacting transactivator, with Glu/Asp-rich carboxy-terminal domain, 4               | 365  | 0.695  | 0.641  | 0.865 | 0.631 | --- |
| 7045969 | Cnksr3          | Cnksr family member 3                                                                           | 289  | 0.988  | 1.544  | 0.975 | 1.115 | #†  |
| 7250799 | Col1a2          | Collagen, type I, alpha 2                                                                       | 2538 | 1.583  | 0.935  | 0.951 | 1.003 | *#† |
| 7354636 | Coq10b          | Coenzyme Q10 homolog B (S. cerevisiae)                                                          | 580  | 1.421  | 2.253  | 2.049 | 2.393 | *#† |
| 7077481 | Csf2            | Colony stimulating factor 2 (granulocyte-macrophage)                                            | 37   | 1.008  | 1.694  | 1.163 | 1.168 | #†  |
| 7350918 | Csrnp1          | Cysteine-serine-rich nuclear protein 1                                                          | 257  | 2.066  | 4.191  | 2.613 | 2.400 | *#† |
| 7051386 | Csrp3           | Cysteine and glycine-rich protein 3                                                             | 2662 | 1.040  | 1.512  | 1.234 | 1.245 | #†  |
| 7044959 | Ctgf            | Connective tissue growth factor                                                                 | 1305 | 3.006  | 2.566  | 1.743 | 1.819 | *#  |
| 7333046 | Cwc15 LOC310177 | CWC15 spliceosome-associated protein homolog (S. cerevisiae)   similar to RIKEN cDNA 0610040D20 | 425  | 0.664  | 1.135  | 1.016 | 1.196 | *†  |
| 7123885 | Cxcl1           | Chemokine (C-X-C motif) ligand 1 (melanoma growth stimulating activity, alpha)                  | 2563 | 1.585  | 1.257  | 2.044 | 1.085 | *#† |
| 7214253 | Cyp2u1          | Cytochrome P450, family 2, subfamily u, polypeptide 1                                           | 362  | 0.856  | 0.599  | 0.927 | 0.868 | #   |
| 7215359 | Cyr61           | Cysteine-rich, angiogenic inducer, 61                                                           | 1616 | 5.414  | 3.769  | 2.591 | 1.826 | *#† |
| 7222734 | Ddit4           | DNA-damage-inducible transcript 4                                                               | 1221 | 0.941  | 0.483  | 1.147 | 1.013 | #†  |
| 7107035 | Dnm3            | Dynamin 3                                                                                       | 379  | 0.481  | 0.566  | 0.530 | 0.743 | *#  |
| 7060585 | Dtx4            | Deltex homolog 4 (Drosophila)                                                                   | 455  | 0.851  | 0.643  | 0.785 | 0.738 | *#† |
| 7066011 | Dusp1           | Dual specificity phosphatase 1                                                                  | 1462 | 3.605  | 2.695  | 2.469 | 1.607 | *#† |
| 7108644 | Dusp10          | Dual specificity phosphatase 10                                                                 | 281  | 1.063  | 3.725  | 1.131 | 1.675 | #†  |
| 7152119 | Dusp4           | Dual specificity phosphatase 4                                                                  | 306  | 1.299  | 1.849  | 1.504 | 2.019 | *#† |
| 7043230 | Dusp5           | Dual specificity phosphatase 5                                                                  | 377  | 1.996  | 4.501  | 2.310 | 2.540 | *#† |
| 7314286 | Dusp6           | Dual specificity phosphatase 6                                                                  | 1813 | 1.953  | 2.184  | 1.368 | 1.737 | *#  |
| 7163221 | Edn1            | Endothelin 1                                                                                    | 121  | 2.475  | 2.745  | 2.191 | 1.351 | *#  |
| 7147985 | Efnb2           | Ephrin B2                                                                                       | 154  | 0.933  | 1.537  | 1.075 | 1.221 | #†  |
| 7169197 | Egr1            | Early growth response 1                                                                         | 1804 | 6.774  | 3.158  | 3.421 | 2.388 | *#† |
| 7222466 | Egr2            | Early growth response 2                                                                         | 159  | 5.112  | 4.856  | 5.306 | 3.579 | *#  |
| 7133143 | Egr3            | Early growth response 3                                                                         | 142  | 4.254  | 16.346 | 6.353 | 6.743 | *#† |
| 7259141 | Emp1            | Epithelial membrane protein 1                                                                   | 1724 | 1.265  | 2.128  | 1.060 | 1.101 | #†  |
| 7114850 | Enah            | Enabled homolog (Drosophila)                                                                    | 1485 | 1.817  | 1.339  | 1.050 | 1.066 | *#† |
| 7281135 | Epha2           | Eph receptor A2                                                                                 | 163  | 1.169  | 2.020  | 1.101 | 1.328 | *#† |
| 7123853 | Ereg            | Epiregulin                                                                                      | 139  | 2.137  | 4.518  | 2.968 | 3.572 | *#† |
| 7281719 | Errfi1          | ERBB receptor feedback inhibitor 1                                                              | 1669 | 3.142  | 3.706  | 2.673 | 2.988 | *#† |
| 7334452 | Ets1            | v-ets erythroblastosis virus E26 oncogene homolog 1 (avian)                                     | 712  | 0.895  | 1.755  | 1.044 | 1.276 | #†  |
| 7198615 | F3              | Coagulation factor III (thromboplastin, tissue factor)                                          | 165  | 1.466  | 3.580  | 1.073 | 0.958 | *#† |
| 7065178 | Fam100a         | Family with sequence similarity 100, member A                                                   | 352  | 1.570  | 1.342  | 1.082 | 1.152 | *#† |
| 7297136 | Fam110c         | Family with sequence similarity 110, member C                                                   | 111  | 1.979  | 3.760  | 1.875 | 2.537 | *#† |
| 7327842 | Fbxo32          | F-box protein 32                                                                                | 731  | 0.592  | 0.690  | 0.876 | 0.713 | --- |
| 7345585 | Fdx1            | Ferredoxin 1                                                                                    | 494  | 1.553  | 3.480  | 2.676 | 3.197 | *#† |
| 7260805 | Fgl2            | Fibrinogen-like 2                                                                               | 349  | 1.542  | 1.808  | 1.178 | 1.403 | *#  |
| 7252051 | FlnC            | Filamin C, gamma                                                                                | 559  | 1.735  | 1.583  | 0.917 | 1.051 | *#  |
| 7300295 | Fos             | FBJ osteosarcoma oncogene                                                                       | 178  | 15.214 | 2.952  | 7.867 | 2.566 | *#† |
| 7048605 | Fosb            | FBJ osteosarcoma oncogene B                                                                     | 94   | 25.477 | 23.168 | 3.508 | 2.739 | *#  |
| 7039170 | Fosl1           | Fos-like antigen 1                                                                              | 184  | 1.456  | 5.980  | 2.073 | 3.088 | *#† |
| 7299050 | Frmf6           | FERM domain containing 6                                                                        | 200  | 1.039  | 1.606  | 1.035 | 1.205 | #†  |
| 7204090 | Fst             | Follistatin                                                                                     | 195  | 1.377  | 4.347  | 1.103 | 1.274 | *#† |
| 7115625 | G0s2            | G0/G1switch 2                                                                                   | 2879 | 0.994  | 0.635  | 0.819 | 0.762 | #†  |
| 7265600 | Gadd45a         | Growth arrest and DNA-damage-inducible, alpha                                                   | 951  | 1.094  | 1.842  | 0.927 | 1.218 | *#† |
| 7162363 | Gadd45g         | Growth arrest and DNA-damage-inducible, gamma                                                   | 748  | 3.560  | 2.381  | 1.741 | 1.893 | *#† |
| 7248808 | Gata5           | GATA binding protein 5                                                                          | 426  | 0.965  | 0.664  | 0.914 | 0.719 | #†  |

|         |                            |                                                                                              |      |       |       |        |       |     |
|---------|----------------------------|----------------------------------------------------------------------------------------------|------|-------|-------|--------|-------|-----|
| 7338247 | Gclc                       | Glutamate-cysteine ligase, catalytic subunit                                                 | 798  | 1.412 | 1.668 | 1.451  | 2.034 | *#† |
| 7163357 | Gcnt2                      | Glucosaminyl (N-acetyl) transferase 2, l-branching enzyme                                    | 109  | 1.094 | 1.670 | 1.079  | 1.100 | #†  |
| 7144218 | Gdf15                      | Growth differentiation factor 15                                                             | 291  | 1.583 | 1.143 | 1.804  | 1.158 | *†  |
| 7324926 | Glipr1                     | GLI pathogenesis-related 1                                                                   | 232  | 1.318 | 1.555 | 1.142  | 1.134 | *#  |
| 7187674 | Glrx1                      | Glutaredoxin 1                                                                               | 302  | 0.995 | 1.793 | 1.062  | 1.256 | #†  |
| 7248966 | Gmeb2                      | Glucocorticoid modulatory element binding protein 2                                          | 188  | 1.202 | 1.541 | 1.096  | 1.311 | *#† |
| 7364791 | Gpr55                      | G protein-coupled receptor 55                                                                | 47   | 1.705 | 1.186 | 1.331  | 1.064 | *†  |
| 7243216 | Grem1                      | Gremlin 1, cysteine knot superfamily, homolog (Xenopus laevis)                               | 70   | 1.010 | 1.834 | 1.103  | 1.122 | #†  |
| 7077710 | Hand1                      | Heart and neural crest derivatives expressed 1                                               | 176  | 1.680 | 0.856 | 0.955  | 1.046 | *†  |
| 7047218 | Has1                       | Hyaluronan synthase 1                                                                        | 71   | 2.021 | 2.452 | 3.319  | 3.324 | *#† |
| 7327675 | Has2                       | Hyaluronan synthase 2                                                                        | 552  | 3.069 | 8.143 | 3.862  | 4.896 | *#† |
| 7055290 | Hbb LOC689064 LOC100134871 | Hemoglobin, beta   beta-globin   beta globin minor gene                                      | 4634 | 0.912 | 0.600 | 0.646  | 0.714 | #†  |
| 7174562 | Hbegf                      | Heparin-binding EGF-like growth factor                                                       | 304  | 1.503 | 3.592 | 1.285  | 1.610 | *#† |
| 7164850 | Hist1h2ak                  | Histone cluster 1, H2ak                                                                      | 211  | 0.625 | 0.743 | 0.852  | 0.900 | *   |
| 7163227 | Hivp1                      | Human immunodeficiency virus type I enhancer binding protein 1                               | 216  | 1.011 | 1.508 | 0.973  | 1.392 | #†  |
| 7266497 | Hk2                        | Hexokinase 2                                                                                 | 305  | 1.034 | 1.712 | 1.098  | 1.551 | #†  |
| 7202670 | Hmgcr                      | 3-hydroxy-3-methylglutaryl-Coenzyme A reductase                                              | 676  | 1.417 | 1.703 | 1.339  | 1.447 | *#† |
| 7150903 | Hpgd                       | Hydroxyprostaglandin dehydrogenase 15 (NAD)                                                  | 48   | 0.996 | 1.524 | 1.090  | 1.040 | #†  |
| 7216806 | Hspa1b Hspa1a Hspa1l       | Heat shock 70kD protein 1B (mapped)   heat shock 70kD protein 1A   heat shock protein 1-like | 73   | 1.672 | 2.460 | 1.044  | 1.057 | *#† |
| 7133438 | Htr2a                      | 5-hydroxytryptamine (serotonin) receptor 2A                                                  | 652  | 1.224 | 1.598 | 1.271  | 1.042 | *#† |
| 7364798 | Htr2b                      | 5-hydroxytryptamine (serotonin) receptor 2B                                                  | 131  | 0.653 | 0.982 | 0.963  | 0.861 | *†  |
| 7333460 | Icam1                      | Intercellular adhesion molecule 1                                                            | 813  | 2.330 | 1.748 | 1.221  | 1.350 | *#† |
| 7166170 | Idi1                       | Isopentenyl-diphosphate delta isomerase 1                                                    | 1158 | 1.060 | 1.647 | 1.383  | 1.297 | #†  |
| 7179800 | Ier2                       | Immediate early response 2                                                                   | 435  | 5.475 | 2.463 | 3.344  | 1.871 | *#† |
| 7220503 | Ier3                       | Immediate early response 3                                                                   | 1963 | 1.766 | 1.347 | 2.924  | 1.871 | *#† |
| 7112556 | Ier5                       | Immediate early response 5                                                                   | 411  | 2.056 | 1.741 | 1.287  | 1.148 | *#  |
| 7237488 | Ier5l                      | Immediate early response 5-like                                                              | 512  | 0.998 | 0.646 | 0.994  | 0.949 | #†  |
| 7104832 | Il10                       | Interleukin 10                                                                               | 43   | 4.331 | 1.479 | 3.948  | 1.642 | *†  |
| 7028549 | Il11                       | Interleukin 11                                                                               | 222  | 1.769 | 1.920 | 2.061  | 2.115 | *#  |
| 7353844 | Il1rl1                     | Interleukin 1 receptor-like 1                                                                | 525  | 1.069 | 2.842 | 1.178  | 1.257 | #†  |
| 7353831 | Il1rl2                     | Interleukin 1 receptor-like 2                                                                | 91   | 1.136 | 1.600 | 1.097  | 1.100 | #†  |
| 7260080 | Il6                        | Interleukin 6                                                                                | 229  | 6.140 | 4.611 | 12.595 | 5.897 | *#  |
| 7165193 | Inhba                      | Inhibin beta-A                                                                               | 213  | 1.950 | 6.251 | 1.713  | 2.519 | *#† |
| 7067595 | Irf1                       | Interferon regulatory factor 1                                                               | 298  | 0.784 | 0.459 | 0.823  | 0.667 | *#† |
| 7147838 | Irs2                       | Insulin receptor substrate 2                                                                 | 209  | 1.610 | 1.707 | 2.157  | 2.436 | *#  |
| 7229388 | Itgav                      | Integrin, alpha V                                                                            | 140  | 1.723 | 1.631 | 1.062  | 1.118 | *#  |
| 7041047 | Jak2                       | Janus kinase 2                                                                               | 379  | 2.151 | 0.673 | 0.658  | 0.705 | *#† |
| 7288744 | Jun                        | Jun proto-oncogene                                                                           | 587  | 3.052 | 2.252 | 1.410  | 1.074 | *#  |
| 7179739 | Junb                       | Jun B proto-oncogene                                                                         | 392  | 3.287 | 1.443 | 2.713  | 1.781 | *#† |
| 7197866 | Kcna3                      | Potassium voltage-gated channel, shaker-related subfamily, member 3                          | 128  | 0.618 | 0.852 | 0.928  | 1.171 | *†  |
| 7091804 | Kcne1                      | Potassium voltage-gated channel, Isk-related subfamily, member 1                             | 86   | 1.538 | 1.149 | 1.121  | 1.099 | *   |
| 7356519 | Kcne4                      | Potassium voltage-gated channel, Isk-related subfamily, gene 4                               | 1027 | 0.977 | 0.563 | 1.190  | 0.963 | #†  |
| 7073296 | Kcnj2                      | Potassium inwardly-rectifying channel, subfamily J, member 2                                 | 367  | 0.998 | 0.530 | 0.765  | 0.885 | #†  |
| 7149521 | Klf2                       | Kruppel-like factor 2 (lung)                                                                 | 178  | 2.282 | 1.931 | 1.591  | 1.199 | *#† |
| 7286480 | Klf4                       | Kruppel-like factor 4 (gut)                                                                  | 234  | 2.580 | 3.458 | 2.153  | 2.242 | *#† |
| 7134502 | Klf5                       | Kruppel-like factor 5                                                                        | 206  | 1.274 | 2.239 | 0.954  | 1.436 | *#† |
| 7166280 | Klf6                       | Kruppel-like factor 6                                                                        | 970  | 2.538 | 3.016 | 1.433  | 1.419 | *#† |
| 7120521 | Lif                        | Leukemia inhibitory factor (cholinergic differentiation factor)                              | 204  | 4.823 | 4.712 | 7.569  | 5.317 | *#  |
| 7331757 | Lima1 LOC100361502         | LIM domain and actin binding 1   hypothetical protein LOC100361502                           | 188  | 1.577 | 1.374 | 0.971  | 0.939 | *#† |
| 7257290 | Lmcd1                      | LIM and cysteine-rich domains 1                                                              | 523  | 1.751 | 2.929 | 1.181  | 1.714 | *#† |

|         |                                                                                                                                                                               |                                                                                                                                                                                                                                                                                                                                                                                                            |      |       |        |        |        |     |
|---------|-------------------------------------------------------------------------------------------------------------------------------------------------------------------------------|------------------------------------------------------------------------------------------------------------------------------------------------------------------------------------------------------------------------------------------------------------------------------------------------------------------------------------------------------------------------------------------------------------|------|-------|--------|--------|--------|-----|
| 7210664 | Lmna                                                                                                                                                                          | Lamin A                                                                                                                                                                                                                                                                                                                                                                                                    | 909  | 1.429 | 1.588  | 0.985  | 0.995  | *#  |
| 7057647 | LOC100360446                                                                                                                                                                  | Zinc finger and SCAN domain containing 2-like                                                                                                                                                                                                                                                                                                                                                              | 105  | 0.726 | 0.650  | 0.761  | 0.727  | *#  |
| 7335998 | LOC363060                                                                                                                                                                     | Similar to RIKEN cDNA 1600029D21                                                                                                                                                                                                                                                                                                                                                                           | 120  | 1.053 | 1.704  | 1.153  | 2.123  | #†  |
| 7368381 | LOC367515                                                                                                                                                                     | Similar to RIKEN cDNA 1700081O22                                                                                                                                                                                                                                                                                                                                                                           | 163  | 0.608 | 0.919  | 0.959  | 1.021  | *†  |
| 7369922 | LOC501092 LOC501091 LOC687464 LOC367381 RGD1565423 LOC498374 LOC100360712 LOC501222 LOC690398 LOC691575 LOC691487 LOC690576 LOC690672 LOC363433 LOC363306 LOC691626 LOC501224 | Hypothetical LOC501092   similar to Discs large homolog 5 (Placenta and prostate DLG) (Discs large protein P-dlg)   similar to RIKEN cDNA 1700001E04   similar to RIKEN cDNA 4930555G01   similar to cDNA sequence AY358078   rCG43589-like   Hypothetical protein LOC690398   Hypothetical LOC363433   Hypothetical protein LOC363306   Hypothetical protein LOC691626   similar to RIKEN cDNA 2610042L04 | 70   | 0.637 | 0.923  | 1.002  | 1.070  | *†  |
| 7352509 | LOC688459                                                                                                                                                                     | Hypothetical protein LOC688459                                                                                                                                                                                                                                                                                                                                                                             | 59   | 2.175 | 2.969  | 1.157  | 1.360  | *#† |
| 7369926 | LOC690672                                                                                                                                                                     | Similar to Discs large homolog 5 (Placenta and prostate DLG) (Discs large protein P-dlg)                                                                                                                                                                                                                                                                                                                   | 548  | 1.504 | 1.647  | 1.233  | 1.098  | *#  |
| 7187867 | Lysmd3                                                                                                                                                                        | LysM, putative peptidoglycan-binding, domain containing 3                                                                                                                                                                                                                                                                                                                                                  | 302  | 1.120 | 1.572  | 1.426  | 1.411  | *#† |
| 7318753 | Maff                                                                                                                                                                          | v-maf musculoaponeurotic fibrosarcoma oncogene homolog F (avian)                                                                                                                                                                                                                                                                                                                                           | 147  | 1.553 | 1.957  | 1.360  | 1.510  | *#  |
| 7100653 | Mafk                                                                                                                                                                          | v-maf musculoaponeurotic fibrosarcoma oncogene homolog K (avian)                                                                                                                                                                                                                                                                                                                                           | 498  | 1.439 | 1.742  | 1.145  | 1.417  | *#† |
| 7068314 | Map2k3                                                                                                                                                                        | Mitogen activated protein kinase kinase 3                                                                                                                                                                                                                                                                                                                                                                  | 404  | 1.090 | 1.500  | 1.117  | 1.421  | #†  |
| 7266023 | Mat2a                                                                                                                                                                         | Methionine adenosyltransferase II, alpha                                                                                                                                                                                                                                                                                                                                                                   | 2888 | 1.468 | 1.620  | 1.547  | 1.678  | *#  |
| 7325416 | Mdm2                                                                                                                                                                          | Mdm2 p53 binding protein homolog (mouse)                                                                                                                                                                                                                                                                                                                                                                   | 637  | 1.460 | 1.622  | 1.213  | 1.035  | *#  |
| 7194351 | Mei1 Tsc22d2                                                                                                                                                                  | Meiosis inhibitor 1   TSC22 domain family, member 2                                                                                                                                                                                                                                                                                                                                                        | 263  | 1.497 | 2.219  | 1.182  | 1.346  | *#† |
| 7067118 | Mgat1                                                                                                                                                                         | Mannosyl (alpha-1,3-)-glycoprotein beta-1,2-N-acetylglucosaminyltransferase                                                                                                                                                                                                                                                                                                                                | 468  | 0.933 | 1.978  | 1.066  | 1.132  | #†  |
| 7055296 | MGC72973                                                                                                                                                                      | Beta-glo                                                                                                                                                                                                                                                                                                                                                                                                   | 2197 | 0.912 | 0.615  | 0.668  | 0.717  | #†  |
| 7173783 | Mir187                                                                                                                                                                        | MicroRNA mir-187                                                                                                                                                                                                                                                                                                                                                                                           | 103  | 0.666 | 1.077  | 1.211  | 1.238  | *†  |
| 7340376 | Mir191                                                                                                                                                                        | MicroRNA mir-191                                                                                                                                                                                                                                                                                                                                                                                           | 260  | 0.619 | 0.846  | 1.066  | 0.913  | *†  |
| 7070060 | Mir193                                                                                                                                                                        | MicroRNA mir-193                                                                                                                                                                                                                                                                                                                                                                                           | 95   | 1.196 | 2.283  | 1.085  | 1.208  | #†  |
| 7069220 | Mir195                                                                                                                                                                        | MicroRNA mir-195                                                                                                                                                                                                                                                                                                                                                                                           | 56   | 1.807 | 0.837  | 0.841  | 0.972  | *†  |
| 7069688 | Mir212                                                                                                                                                                        | MicroRNA mir-212                                                                                                                                                                                                                                                                                                                                                                                           | 95   | 2.231 | 1.214  | 1.409  | 1.341  | *†  |
| 7069718 | Mir22                                                                                                                                                                         | MicroRNA mir-22                                                                                                                                                                                                                                                                                                                                                                                            | 360  | 1.505 | 1.332  | 1.079  | 1.212  | *#  |
| 7373217 | Mir222                                                                                                                                                                        | MicroRNA mir-222                                                                                                                                                                                                                                                                                                                                                                                           | 40   | 1.472 | 2.856  | 1.089  | 1.247  | *#† |
| 7184116 | Mir27a                                                                                                                                                                        | MicroRNA mir-27a                                                                                                                                                                                                                                                                                                                                                                                           | 79   | 2.616 | 1.287  | 1.194  | 1.482  | *†  |
| 7288447 | Mir31                                                                                                                                                                         | MicroRNA mir-31                                                                                                                                                                                                                                                                                                                                                                                            | 66   | 1.611 | 2.298  | 1.024  | 1.175  | *#  |
| 7345523 | Mir34b                                                                                                                                                                        | MicroRNA mir-34b                                                                                                                                                                                                                                                                                                                                                                                           | 87   | 0.570 | 1.238  | 0.997  | 1.000  | *†  |
| 7211447 | Mllt11                                                                                                                                                                        | Myeloid/lymphoid or mixed-lineage leukemia (trithorax homolog, Drosophila); translocated to, 11                                                                                                                                                                                                                                                                                                            | 335  | 1.675 | 1.681  | 1.402  | 1.552  | *#  |
| 7383823 | Morc4                                                                                                                                                                         | MORC family CW-type zinc finger 4                                                                                                                                                                                                                                                                                                                                                                          | 200  | 1.567 | 1.672  | 0.994  | 0.960  | *#† |
| 7274970 | Murc                                                                                                                                                                          | Muscle-related coiled-coil protein                                                                                                                                                                                                                                                                                                                                                                         | 98   | 0.847 | 1.634  | 0.976  | 1.217  | *#† |
| 7317471 | Myc                                                                                                                                                                           | Myelocytomatosis oncogene                                                                                                                                                                                                                                                                                                                                                                                  | 212  | 1.830 | 2.602  | 1.323  | 1.554  | *#† |
| 7297245 | Nampt                                                                                                                                                                         | Nicotinamide phosphoribosyltransferase                                                                                                                                                                                                                                                                                                                                                                     | 352  | 0.848 | 1.570  | 1.242  | 1.710  | #†  |
| 7155813 | Nfil3                                                                                                                                                                         | Nuclear factor, interleukin 3 regulated                                                                                                                                                                                                                                                                                                                                                                    | 107  | 1.584 | 2.735  | 1.968  | 2.369  | *#† |
| 7197523 | Ngf                                                                                                                                                                           | Nerve growth factor (beta polypeptide)                                                                                                                                                                                                                                                                                                                                                                     | 110  | 0.935 | 1.720  | 1.184  | 1.238  | #†  |
| 7029445 | Nkpd1                                                                                                                                                                         | NTPase, KAP family P-loop domain containing 1                                                                                                                                                                                                                                                                                                                                                              | 126  | 0.583 | 1.167  | 1.364  | 0.989  | *†  |
| 7059690 | Npas4                                                                                                                                                                         | Neuronal PAS domain protein 4                                                                                                                                                                                                                                                                                                                                                                              | 64   | 1.215 | 2.004  | 1.004  | 1.059  | *#† |
| 7218756 | Npffr1                                                                                                                                                                        | Neuropeptide FF receptor 1                                                                                                                                                                                                                                                                                                                                                                                 | 73   | 1.524 | 1.008  | 1.003  | 0.941  | *†  |
| 7194492 | Npy2r                                                                                                                                                                         | Neuropeptide Y receptor Y2                                                                                                                                                                                                                                                                                                                                                                                 | 55   | 1.705 | 0.668  | 0.803  | 0.754  | *#† |
| 7185182 | Nqo1                                                                                                                                                                          | NAD(P)H dehydrogenase, quinone 1                                                                                                                                                                                                                                                                                                                                                                           | 286  | 1.052 | 1.504  | 1.164  | 1.321  | #†  |
| 7082318 | Nr1d1                                                                                                                                                                         | Nuclear receptor subfamily 1, group D, member 1                                                                                                                                                                                                                                                                                                                                                            | 361  | 0.974 | 0.641  | 0.872  | 0.773  | #†  |
| 7320920 | Nr4a1                                                                                                                                                                         | Nuclear receptor subfamily 4, group A, member 1                                                                                                                                                                                                                                                                                                                                                            | 163  | 8.505 | 18.929 | 20.769 | 20.607 | *#† |
| 7239111 | Nr4a2                                                                                                                                                                         | Nuclear receptor subfamily 4, group A, member 2                                                                                                                                                                                                                                                                                                                                                            | 106  | 2.381 | 8.923  | 13.409 | 14.626 | *#† |



|         |                   |                                                                             |      |       |       |        |        |     |
|---------|-------------------|-----------------------------------------------------------------------------|------|-------|-------|--------|--------|-----|
| 7274931 | Nr4a3             | Nuclear receptor subfamily 4, group A, member 3                             | 121  | 2.813 | 7.361 | 10.615 | 11.601 | *#† |
| 7057283 | Nupr1             | Nuclear protein, transcriptional regulator, 1                               | 573  | 0.899 | 1.534 | 1.023  | 0.905  | #†  |
| 7371735 | Odz3 LOC100361541 | Odz, odd Oz/ten-m homolog 3 (Drosophila)   odz, odd Oz/ten-m homolog 3-like | 163  | 0.647 | 1.000 | 0.992  | 1.051  | *†  |
| 7270053 | Olr1              | Oxidized low density lipoprotein (lectin-like) receptor 1                   | 1893 | 1.290 | 1.585 | 1.639  | 1.998  | *#  |
| 7078087 | Olr1463           | Olfactory receptor 1463                                                     | 66   | 1.811 | 0.828 | 1.029  | 1.155  | *†  |
| 7034974 | Olr152            | Olfactory receptor 152                                                      | 54   | 1.620 | 1.012 | 1.253  | 1.073  | *†  |
| 7131237 | Olr1614           | Olfactory receptor 1614                                                     | 82   | 1.682 | 0.848 | 1.022  | 0.906  | *†  |
| 7216279 | Olr1730           | Olfactory receptor 1730                                                     | 68   | 1.903 | 1.020 | 1.081  | 0.974  | *†  |
| 7055382 | Olr175            | Olfactory receptor 175                                                      | 56   | 1.591 | 0.855 | 0.874  | 1.187  | *†  |
| 7055527 | Olr217            | Olfactory receptor 217                                                      | 89   | 1.668 | 0.976 | 1.023  | 1.005  | *†  |
| 7241229 | Olr496            | Olfactory receptor 496                                                      | 54   | 1.740 | 0.816 | 0.952  | 0.890  | *#† |
| 7241352 | Olr602            | Olfactory receptor 602                                                      | 98   | 0.594 | 0.993 | 1.074  | 0.984  | *†  |
| 7241406 | Olr661            | Olfactory receptor 661                                                      | 40   | 1.644 | 1.163 | 1.135  | 0.923  | *†  |
| 7235566 | Pard6b            | Par-6 (partitioning defective 6) homolog beta (C. elegans)                  | 98   | 1.230 | 3.622 | 1.104  | 1.838  | *#† |
| 7208307 | Pcdh18            | Protocadherin 18                                                            | 531  | 0.612 | 0.797 | 0.828  | 0.761  | *†  |
| 7133759 | Pcdh8             | Protocadherin 8                                                             | 68   | 0.650 | 1.081 | 1.267  | 1.297  | *†  |
| 7283909 | Pdp1              | Pyruvate dehydrogenase phosphatase catalytic subunit 1                      | 705  | 0.836 | 1.668 | 0.960  | 1.075  | #†  |
| 7121583 | Peli1             | Pellino 1                                                                   | 102  | 1.537 | 1.422 | 1.363  | 1.411  | *#† |
| 7365259 | Per2              | Period homolog 2 (Drosophila)                                               | 140  | 1.417 | 1.820 | 1.020  | 1.090  | *#† |
| 7314872 | Phlda1            | Pleckstrin homology-like domain, family A, member 1                         | 520  | 3.517 | 4.155 | 3.994  | 3.388  | *#† |
| 7120384 | Pik3ip1           | Phosphoinositide-3-kinase interacting protein 1                             | 485  | 0.696 | 0.544 | 0.803  | 0.585  | *#† |
| 7217331 | Pim1              | Pim-1 oncogene                                                              | 1687 | 1.610 | 1.703 | 1.772  | 1.208  | *#  |
| 7189518 | Plk2              | Polo-like kinase 2 (Drosophila)                                             | 1947 | 2.445 | 3.030 | 1.707  | 1.559  | *#† |
| 7290290 | Plk3              | Polo-like kinase 3 (Drosophila)                                             | 179  | 1.449 | 1.508 | 1.678  | 1.308  | *#  |
| 7051029 | Ppp1r15a          | Protein phosphatase 1, regulatory (inhibitor) subunit 15A                   | 241  | 1.729 | 2.059 | 1.402  | 1.307  | *#† |
| 7152038 | Pragmin           | Pragma of Rnd2                                                              | 148  | 1.113 | 1.887 | 1.100  | 1.422  | *#† |
| 7375047 | Prdx4             | Peroxiredoxin 4                                                             | 916  | 0.657 | 1.065 | 1.008  | 1.024  | *†  |
| 7197221 | Prkab2            | Protein kinase, AMP-activated, beta 2 non-catalytic subunit                 | 148  | 1.541 | 1.691 | 1.062  | 1.131  | *#  |
| 7106132 | Ptgs2             | Prostaglandin-endoperoxide synthase 2                                       | 258  | 7.005 | 7.981 | 5.272  | 3.312  | *#  |
| 7360736 | Ptp4a1            | Protein tyrosine phosphatase 4a1                                            | 1189 | 1.542 | 1.629 | 1.408  | 1.422  | *#  |
| 7048738 | PVR               | Poliovirus receptor                                                         | 916  | 1.054 | 1.853 | 1.149  | 1.442  | #†  |
| 7346979 | Rab8b             | RAB8B, member RAS oncogene family                                           | 892  | 0.648 | 1.178 | 1.065  | 1.071  | *†  |
| 7089813 | Ranbp1            | RAN binding protein 1                                                       | 1954 | 0.486 | 1.016 | 1.005  | 1.025  | *†  |
| 7078129 | Rasd1             | RAS, dexamethasone-induced 1                                                | 419  | 2.249 | 0.875 | 2.179  | 1.236  | *#† |
| 7124933 | Ras11b            | RAS-like family 11 member B                                                 | 855  | 2.304 | 1.841 | 1.643  | 1.362  | *#† |
| 7128932 | Rel               | v-rel reticuloendotheliosis viral oncogene homolog (avian)                  | 203  | 1.532 | 1.951 | 1.581  | 2.022  | *#† |
| 7346143 | RGD1305464        | Similar to human chromosome 15 open reading frame 39                        | 266  | 1.050 | 0.634 | 1.194  | 1.056  | #†  |
| 7064324 | RGD1308127        | Similar to 2700078E11Rik protein                                            | 486  | 0.932 | 1.645 | 1.055  | 1.110  | #†  |
| 7349995 | RGD1560778        | Similar to RIKEN cDNA 6530418L21                                            | 136  | 0.584 | 0.776 | 0.880  | 1.122  | *#† |
| 7157785 | RGD1564767        | Histone H2a                                                                 | 165  | 0.663 | 0.856 | 0.923  | 0.964  | *   |
| 7112009 | Rgs2              | Regulator of G-protein signaling 2                                          | 613  | 3.146 | 5.494 | 5.024  | 4.199  | *#† |
| 7304448 | Rhob              | Ras homolog gene family, member B                                           | 799  | 2.595 | 2.593 | 2.209  | 1.786  | *#  |
| 7284153 | Ripk2             | Receptor-interacting serine-threonine kinase 2                              | 397  | 0.936 | 2.663 | 1.105  | 1.535  | #†  |
| 7331581 | Rnd1              | Rho family GTPase 1                                                         | 421  | 1.595 | 2.215 | 1.173  | 1.519  | *#† |
| 7072329 | Rnd2              | Rho family GTPase 2                                                         | 173  | 1.509 | 0.950 | 0.932  | 0.996  | *†  |
| 7238766 | Rnd3              | Rho family GTPase 3                                                         | 604  | 1.767 | 1.793 | 1.238  | 1.013  | *#  |
| 7220337 | Rnf39             | Ring finger protein 39                                                      | 133  | 1.031 | 1.587 | 0.945  | 1.147  | #†  |
| 7266888 | Rpl22             | Ribosomal protein L22                                                       | 661  | 0.550 | 1.168 | 1.161  | 1.150  | *†  |
| 7162921 | Rpl27 RGD1563835  | Ribosomal protein L27   similar to Ribosomal protein L27                    | 1217 | 0.490 | 1.072 | 1.421  | 1.191  | *†  |
| 7204692 | Rps15a            | Ribosomal protein S15a                                                      | 349  | 0.637 | 1.091 | 0.998  | 1.137  | *†  |
| 7110777 | Rps26             | Ribosomal protein S26                                                       | 2062 | 0.631 | 1.009 | 0.977  | 1.056  | --- |

|         |             |                                                                                   |      |       |        |       |       |     |
|---------|-------------|-----------------------------------------------------------------------------------|------|-------|--------|-------|-------|-----|
| 7062166 | Rps27a      | Ribosomal protein S27a                                                            | 596  | 0.667 | 1.050  | 1.180 | 1.180 | *†  |
| 7196707 | S100a10     | S100 calcium binding protein A10                                                  | 1623 | 0.919 | 1.812  | 1.127 | 1.156 | #†  |
| 7375057 | Sat1        | Spermidine/spermine N1-acetyl transferase 1                                       | 641  | 2.226 | 2.550  | 1.471 | 1.497 | *#  |
| 7144691 | Sc4mol      | Sterol-C4-methyl oxidase-like                                                     | 1985 | 0.910 | 1.520  | 1.137 | 1.137 | #†  |
| 7103916 | Serpnb2     | Serine (or cysteine) peptidase inhibitor, clade B, member 2                       | 284  | 3.388 | 14.086 | 1.826 | 3.231 | *#† |
| 7101220 | Serpine1    | Serine (or cysteine) peptidase inhibitor, clade E, member 1                       | 601  | 6.428 | 8.141  | 1.773 | 2.001 | *#  |
| 7029999 | Sertad1     | SERTA domain containing 1                                                         | 299  | 1.776 | 1.622  | 1.275 | 1.324 | *#  |
| 7045121 | Sgk1        | Serum/glucocorticoid regulated kinase 1                                           | 1072 | 1.779 | 3.202  | 0.962 | 0.910 | *#† |
| 7214260 | Sgms2       | Sphingomyelin synthase 2                                                          | 126  | 1.003 | 1.720  | 0.955 | 1.319 | #†  |
| 7221460 | Sik1        | Salt-inducible kinase 1                                                           | 415  | 1.889 | 2.039  | 3.478 | 4.112 | *#† |
| 7170785 | Slc12a2     | Solute carrier family 12 (sodium/potassium/chloride transporters), member 2       | 333  | 1.484 | 1.934  | 0.945 | 1.008 | *#† |
| 7232493 | Slc20a1     | Solute carrier family 20 (phosphate transporter), member 1                        | 1144 | 1.288 | 1.665  | 1.256 | 1.453 | *#† |
| 7237652 | Slc25a25    | Solute carrier family 25 (mitochondrial carrier, phosphate carrier), member 25    | 148  | 2.662 | 1.748  | 1.561 | 1.257 | *#† |
| 7269356 | Slc2a3      | Solute carrier family 2 (facilitated glucose transporter), member 3               | 435  | 0.833 | 1.571  | 2.040 | 2.752 | *#† |
| 7136592 | Slc4a7      | Solute carrier family 4, sodium bicarbonate cotransporter, member 7               | 156  | 1.027 | 1.742  | 1.014 | 1.297 | #†  |
| 7096358 | Slc7a1      | Solute carrier family 7 (cationic amino acid transporter, y+ system), member 1    | 410  | 0.963 | 1.594  | 1.014 | 1.186 | #†  |
| 7053013 | Slco3a1     | Solute carrier organic anion transporter family, member 3a1                       | 101  | 1.861 | 1.615  | 0.767 | 1.003 | *#  |
| 7346730 | Smad6       | SMAD family member 6                                                              | 353  | 0.819 | 0.617  | 1.039 | 0.811 | *#† |
| 7235533 | Snai1       | Snail homolog 1 (Drosophila)                                                      | 178  | 0.973 | 0.511  | 1.205 | 1.109 | #†  |
| 7187663 | Snrpd1 EII2 | Small nuclear ribonucleoprotein D1   elongation factor RNA polymerase II 2        | 148  | 1.285 | 2.281  | 1.239 | 2.557 | *#† |
| 7084788 | Socs3       | Suppressor of cytokine signaling 3                                                | 588  | 1.280 | 0.614  | 1.039 | 1.258 | *#† |
| 7141508 | Spry2       | Sprouty homolog 2 (Drosophila)                                                    | 795  | 1.720 | 2.261  | 1.523 | 1.221 | *#† |
| 7351949 | Srf         | Serum response factor (c-fos serum response element-binding transcription factor) | 732  | 1.775 | 1.663  | 1.100 | 1.143 | *#  |
| 7233921 | Srxn1       | Sulfiredoxin 1 homolog (S. cerevisiae)                                            | 119  | 1.802 | 2.171  | 1.553 | 1.812 | *#† |
| 7298488 | Sstr1       | Somatostatin receptor 1                                                           | 125  | 1.792 | 1.123  | 1.202 | 1.237 | *†  |
| 7133039 | Stc1        | Stanniocalcin 1                                                                   | 1016 | 1.162 | 1.568  | 0.968 | 1.049 | #†  |
| 7345054 | Tagln       | Transgelin                                                                        | 2486 | 1.124 | 1.651  | 1.183 | 1.214 | *#† |
| 7261795 | Tfpi2       | Tissue factor pathway inhibitor 2                                                 | 294  | 1.040 | 2.020  | 1.314 | 1.781 | #†  |
| 7308910 | Tgfb3       | Transforming growth factor, beta 3                                                | 299  | 1.297 | 2.044  | 1.240 | 1.505 | *#† |
| 7246265 | Thbd        | Thrombomodulin                                                                    | 110  | 1.756 | 1.588  | 1.218 | 1.642 | *#  |
| 7323040 | Timp3       | TIMP metalloproteinase inhibitor 3                                                | 960  | 1.374 | 1.717  | 1.022 | 1.171 | *#† |
| 7210192 | Tlr2        | Toll-like receptor 2                                                              | 336  | 0.545 | 0.952  | 0.978 | 0.986 | *†  |
| 7313905 | Tmcc3       | transmembrane and coiled-coil domain family 3                                     | 190  | 1.011 | 0.638  | 0.889 | 0.749 | #†  |
| 7327525 | Tnfrsf11b   | Tumor necrosis factor receptor superfamily, member 11b                            | 1541 | 1.213 | 1.818  | 1.167 | 1.106 | *#† |
| 7075088 | Tnfrsf12a   | Tumor necrosis factor receptor superfamily, member 12a                            | 1263 | 1.519 | 1.830  | 1.164 | 1.419 | *#† |
| 7287386 | Tnfsf15     | Tumor necrosis factor (ligand) superfamily, member 15                             | 220  | 1.370 | 1.813  | 0.986 | 0.862 | *#† |
| 7106964 | Tnfsf18     | Tumor necrosis factor (ligand) superfamily, member 18                             | 129  | 2.348 | 7.480  | 1.578 | 1.602 | *#† |
| 7272734 | Tp53inp1    | Tumor protein p53 inducible nuclear protein 1                                     | 1029 | 1.078 | 1.554  | 1.077 | 1.122 | #†  |
| 7317342 | Trib1       | Tribbles homolog 1 (Drosophila)                                                   | 183  | 2.805 | 2.680  | 1.427 | 1.726 | *#  |
| 7054758 | Tsku        | Tsukushin                                                                         | 427  | 0.666 | 0.890  | 0.824 | 0.830 | *#† |
| 7297329 | Twist1      | Twist homolog 1 (Drosophila)                                                      | 215  | 1.259 | 3.797  | 1.477 | 1.707 | #†  |
| 7113823 | Uap1        | UDP-N-acetylglucosamine pyrophosphorylase 1                                       | 430  | 1.172 | 3.186  | 1.701 | 3.032 | *#† |
| 7118521 | Ugdh        | UDP-glucose dehydrogenase                                                         | 1143 | 1.054 | 1.566  | 1.415 | 1.548 | #†  |
| 7030810 | Unknown     | Unknown                                                                           | 35   | 1.573 | 1.116  | 1.157 | 1.118 | *†  |
| 7031418 | Unknown     | Unknown                                                                           | 170  | 0.600 | 0.643  | 0.930 | 0.931 | *#  |
| 7034150 | Unknown     | Unknown                                                                           | 392  | 0.886 | 0.665  | 0.696 | 0.887 | #†  |
| 7040909 | Unknown     | Unknown                                                                           | 227  | 0.650 | 0.764  | 0.884 | 1.019 | --- |
| 7041453 | Unknown     | Unknown                                                                           | 52   | 2.208 | 1.430  | 1.387 | 1.158 | *†  |
| 7054779 | Unknown     | Unknown                                                                           | 38   | 1.935 | 1.100  | 0.989 | 0.953 | *†  |

|         |         |         |     |       |       |       |       |     |
|---------|---------|---------|-----|-------|-------|-------|-------|-----|
| 7067733 | Unknown | Unknown | 41  | 1.515 | 0.888 | 0.944 | 0.930 | *†  |
| 7068430 | Unknown | Unknown | 80  | 0.621 | 0.860 | 0.955 | 1.196 | *   |
| 7068912 | Unknown | Unknown | 94  | 1.547 | 0.983 | 1.121 | 1.125 | *†  |
| 7071496 | Unknown | Unknown | 96  | 0.587 | 0.789 | 0.662 | 0.877 | *   |
| 7072840 | Unknown | Unknown | 85  | 1.621 | 1.027 | 1.105 | 1.105 | *†  |
| 7075049 | Unknown | Unknown | 138 | 1.514 | 0.986 | 1.014 | 1.110 | *†  |
| 7076649 | Unknown | Unknown | 41  | 1.644 | 1.126 | 1.223 | 1.300 | *   |
| 7077802 | Unknown | Unknown | 96  | 0.568 | 0.751 | 0.789 | 0.726 | *#  |
| 7083146 | Unknown | Unknown | 67  | 1.563 | 0.995 | 1.007 | 0.936 | *†  |
| 7083509 | Unknown | Unknown | 67  | 2.010 | 1.119 | 1.299 | 1.028 | *†  |
| 7091841 | Unknown | Unknown | 68  | 1.216 | 1.593 | 1.154 | 1.779 | #†  |
| 7096304 | Unknown | Unknown | 90  | 0.795 | 0.625 | 0.692 | 0.620 | *#† |
| 7098954 | Unknown | Unknown | 76  | 0.619 | 0.906 | 1.022 | 0.919 | *†  |
| 7105586 | Unknown | Unknown | 457 | 1.248 | 2.543 | 1.221 | 1.412 | #†  |
| 7108686 | Unknown | Unknown | 58  | 1.616 | 0.940 | 0.920 | 0.955 | *†  |
| 7111633 | Unknown | Unknown | 112 | 1.896 | 1.984 | 1.434 | 1.512 | *#  |
| 7113707 | Unknown | Unknown | 373 | 0.904 | 0.585 | 0.768 | 0.724 | #†  |
| 7113780 | Unknown | Unknown | 63  | 1.743 | 0.967 | 1.079 | 1.158 | *†  |
| 7118707 | Unknown | Unknown | 57  | 1.547 | 0.975 | 1.085 | 1.009 | *†  |
| 7147988 | Unknown | Unknown | 68  | 0.918 | 1.676 | 1.094 | 1.174 | #†  |
| 7150788 | Unknown | Unknown | 70  | 0.472 | 1.135 | 0.980 | 0.979 | *†  |
| 7153410 | Unknown | Unknown | 139 | 1.173 | 0.631 | 0.826 | 0.834 | *#† |
| 7164849 | Unknown | Unknown | 942 | 0.584 | 0.891 | 0.843 | 0.871 | *†  |
| 7167845 | Unknown | Unknown | 342 | 0.561 | 0.747 | 1.035 | 0.976 | *   |
| 7170361 | Unknown | Unknown | 78  | 0.606 | 0.878 | 0.875 | 0.939 | *†  |
| 7173133 | Unknown | Unknown | 791 | 1.184 | 0.492 | 0.927 | 0.498 | #†  |
| 7174327 | Unknown | Unknown | 85  | 1.568 | 1.400 | 1.756 | 1.600 | --- |
| 7194194 | Unknown | Unknown | 75  | 1.136 | 2.320 | 0.859 | 1.213 | #†  |
| 7200422 | Unknown | Unknown | 124 | 2.974 | 2.049 | 1.590 | 1.447 | *#† |
| 7205580 | Unknown | Unknown | 185 | 1.920 | 1.774 | 1.298 | 0.900 | *#  |
| 7207860 | Unknown | Unknown | 395 | 0.659 | 1.204 | 1.051 | 1.042 | *†  |
| 7209914 | Unknown | Unknown | 103 | 1.107 | 0.601 | 0.703 | 0.665 | #†  |
| 7212310 | Unknown | Unknown | 155 | 1.077 | 2.227 | 1.429 | 1.869 | #†  |
| 7224482 | Unknown | Unknown | 540 | 0.354 | 0.504 | 0.532 | 0.712 | *#  |
| 7239047 | Unknown | Unknown | 37  | 1.514 | 1.059 | 1.094 | 1.086 | *†  |
| 7239847 | Unknown | Unknown | 35  | 1.659 | 0.892 | 1.079 | 1.020 | *†  |
| 7244036 | Unknown | Unknown | 124 | 0.624 | 0.894 | 1.036 | 0.936 | *†  |
| 7244657 | Unknown | Unknown | 290 | 0.921 | 2.037 | 1.166 | 1.343 | #†  |
| 7252930 | Unknown | Unknown | 41  | 2.276 | 0.916 | 1.123 | 1.076 | *†  |
| 7256305 | Unknown | Unknown | 70  | 1.403 | 1.519 | 2.035 | 2.238 | *#  |
| 7259197 | Unknown | Unknown | 78  | 1.594 | 1.070 | 1.263 | 1.179 | *†  |
| 7264249 | Unknown | Unknown | 57  | 1.502 | 0.971 | 1.040 | 0.954 | *†  |
| 7267783 | Unknown | Unknown | 60  | 1.531 | 1.092 | 1.136 | 1.024 | *†  |
| 7268354 | Unknown | Unknown | 63  | 1.665 | 1.842 | 1.119 | 1.373 | *#  |
| 7288050 | Unknown | Unknown | 182 | 1.014 | 0.619 | 0.792 | 0.651 | #†  |
| 7290857 | Unknown | Unknown | 111 | 0.595 | 0.881 | 0.816 | 0.691 | *#† |
| 7294779 | Unknown | Unknown | 90  | 1.518 | 0.938 | 1.026 | 0.960 | *†  |
| 7297222 | Unknown | Unknown | 267 | 1.827 | 2.360 | 1.210 | 1.539 | *#† |
| 7297247 | Unknown | Unknown | 194 | 1.399 | 2.808 | 2.224 | 1.575 | *#† |
| 7300423 | Unknown | Unknown | 134 | 0.561 | 0.935 | 1.084 | 0.999 | *†  |
| 7306804 | Unknown | Unknown | 54  | 1.808 | 1.019 | 1.031 | 1.062 | *†  |
| 7310849 | Unknown | Unknown | 132 | 0.518 | 0.622 | 0.784 | 0.761 | *#  |

|         |               |                                              |     |       |       |       |       |     |
|---------|---------------|----------------------------------------------|-----|-------|-------|-------|-------|-----|
| 7316664 | Unknown       | Unknown                                      | 43  | 1.513 | 0.988 | 1.069 | 1.012 | *†  |
| 7318523 | Unknown       | Unknown                                      | 59  | 1.603 | 1.408 | 1.111 | 1.107 | *#  |
| 7324225 | Unknown       | Unknown                                      | 51  | 1.506 | 0.907 | 0.943 | 1.013 | *†  |
| 7327468 | Unknown       | Unknown                                      | 188 | 1.083 | 1.626 | 0.990 | 1.191 | #†  |
| 7327469 | Unknown       | Unknown                                      | 120 | 1.231 | 1.688 | 1.023 | 1.280 | *#† |
| 7330257 | Unknown       | Unknown                                      | 126 | 0.632 | 0.932 | 1.103 | 1.073 | *†  |
| 7335235 | Unknown       | Unknown                                      | 580 | 1.268 | 2.624 | 1.184 | 1.640 | #†  |
| 7340113 | Unknown       | Unknown                                      | 113 | 0.546 | 0.911 | 0.980 | 0.952 | *†  |
| 7351669 | Unknown       | Unknown                                      | 40  | 1.845 | 1.059 | 1.101 | 1.115 | *†  |
| 7361747 | Unknown       | Unknown                                      | 95  | 2.246 | 1.756 | 0.847 | 0.825 | *#† |
| 7367065 | Unknown       | Unknown                                      | 305 | 0.663 | 1.402 | 0.942 | 0.983 | †   |
| 7367480 | Unknown       | Unknown                                      | 242 | 0.553 | 1.158 | 0.728 | 0.996 | *†  |
| 7367576 | Unknown       | Unknown                                      | 105 | 0.548 | 0.943 | 0.931 | 0.921 | *†  |
| 7368026 | Unknown       | Unknown                                      | 107 | 0.465 | 1.027 | 1.066 | 0.985 | *†  |
| 7368095 | Unknown       | Unknown                                      | 112 | 1.810 | 0.840 | 0.821 | 0.810 | *†  |
| 7368449 | Unknown       | Unknown                                      | 86  | 0.658 | 1.168 | 0.988 | 0.913 | *†  |
| 7368483 | Unknown       | Unknown                                      | 224 | 1.029 | 2.519 | 0.923 | 1.490 | #†  |
| 7368677 | Unknown       | Unknown                                      | 87  | 1.643 | 1.079 | 1.075 | 0.964 | *†  |
| 7368735 | Unknown       | Unknown                                      | 131 | 1.628 | 1.272 | 1.150 | 0.935 | *   |
| 7369075 | Unknown       | Unknown                                      | 48  | 1.556 | 1.206 | 0.984 | 0.820 | *#† |
| 7369324 | Unknown       | Unknown                                      | 86  | 2.336 | 1.133 | 1.100 | 1.289 | *†  |
| 7369358 | Unknown       | Unknown                                      | 968 | 0.605 | 0.941 | 0.972 | 1.002 | *†  |
| 7369500 | Unknown       | Unknown                                      | 124 | 0.623 | 0.980 | 0.752 | 0.876 | *†  |
| 7369845 | Unknown       | Unknown                                      | 165 | 0.663 | 1.053 | 0.916 | 0.742 | *†  |
| 7370018 | Unknown       | Unknown                                      | 371 | 1.600 | 1.002 | 0.910 | 0.742 | *†  |
| 7370023 | Unknown       | Unknown                                      | 888 | 1.076 | 1.500 | 1.312 | 1.168 | #†  |
| 7370343 | Unknown       | Unknown                                      | 402 | 0.589 | 1.383 | 1.229 | 0.824 | *†  |
| 7370444 | Unknown       | Unknown                                      | 70  | 1.631 | 1.253 | 0.777 | 0.766 | *#† |
| 7370452 | Unknown       | Unknown                                      | 77  | 0.799 | 0.653 | 0.823 | 0.732 | #   |
| 7370879 | Unknown       | Unknown                                      | 94  | 0.602 | 1.049 | 1.050 | 0.928 | *†  |
| 7370997 | Unknown       | Unknown                                      | 761 | 0.913 | 2.179 | 0.836 | 1.376 | #†  |
| 7370998 | Unknown       | Unknown                                      | 912 | 1.013 | 1.550 | 0.847 | 1.066 | #†  |
| 7371014 | Unknown       | Unknown                                      | 82  | 1.564 | 0.907 | 0.720 | 0.726 | *†  |
| 7371233 | Unknown       | Unknown                                      | 38  | 2.207 | 1.055 | 1.093 | 0.972 | *†  |
| 7371555 | Unknown       | Unknown                                      | 172 | 1.117 | 2.645 | 1.117 | 1.572 | #†  |
| 7371731 | Unknown       | Unknown                                      | 624 | 0.611 | 0.755 | 0.862 | 0.790 | *#  |
| 7381687 | Unknown       | Unknown                                      | 128 | 1.648 | 0.941 | 0.990 | 1.252 | *†  |
| 7384598 | Unknown       | Unknown                                      | 49  | 1.823 | 0.951 | 0.985 | 0.904 | *†  |
| 7136062 | Vcl           | Vinculin                                     | 669 | 1.437 | 1.821 | 1.023 | 1.060 | *#† |
| 7151046 | Vegfc         | Vascular endothelial growth factor C         | 182 | 0.996 | 1.537 | 0.979 | 0.942 | #†  |
| 7085544 | Vgll3         | Vestigial like 3 (Drosophila)                | 417 | 1.101 | 2.416 | 1.033 | 1.036 | #†  |
| 7335234 | Vof16         | Ischemia related factor vof-16               | 410 | 1.443 | 2.856 | 1.080 | 1.616 | #†  |
| 7095316 | Vpreb1 Vpreb2 | Pre-B lymphocyte 1   pre-B lymphocyte gene 2 | 61  | 1.514 | 1.067 | 1.072 | 1.100 | *†  |
| 7350922 | Xirp1         | Xin actin-binding repeat containing 1        | 520 | 1.323 | 1.997 | 1.132 | 1.644 | *#† |
| 7228236 | Xirp2         | Xin actin-binding repeat containing 2        | 586 | 1.267 | 1.810 | 1.172 | 1.264 | #   |
| 7096947 | Zfand2a       | Zinc finger, AN1-type domain 2A              | 555 | 1.204 | 1.714 | 1.217 | 1.513 | *#† |
| 7105589 | Zfp281        | Zinc finger protein 281                      | 462 | 1.817 | 2.214 | 1.326 | 1.439 | *#† |
| 7049312 | Zfp36         | Zinc finger protein 36                       | 302 | 3.606 | 2.516 | 3.204 | 1.845 | *#† |
| 7149612 | Zfp709        | Zinc finger protein 709                      | 129 | 0.659 | 0.752 | 0.945 | 0.879 | *#  |
| 7284912 | Znf292        | Zinc finger protein 292                      | 235 | 1.024 | 0.638 | 0.938 | 0.690 | #†  |
| 7197294 | Znf697        | Zinc finger protein 697                      | 183 | 1.047 | 2.216 | 1.041 | 1.412 | #†  |
